# Supplementary material for: Discovery of novel non-retroviral endogenous viral elements reveals their long-term co-evolution with spiders
Source: Research Square preprint supplement (doi:10.21203/rs.3.rs-4996788/v1), 2024-10-15
Supplement: Supplementary file 1 [file 0e21d48ed6870411bdc15e5c.pdf]

Reporting Summary

Nature Portfolio wishes to improve the reproducibility of the work that we publish. This form provides structure for consistency and transparency in reporting. For further information on Nature Portfolio policies, see our [Editorial Policies](#) and the [Editorial Policy Checklist](#).

Statistics

For all statistical analyses, confirm that the following items are present in the figure legend, table legend, main text, or Methods section.

|                                     |                                                                                                                                                                                                                                                                                     |
|-------------------------------------|-------------------------------------------------------------------------------------------------------------------------------------------------------------------------------------------------------------------------------------------------------------------------------------|
| n/a                                 | Confirmed                                                                                                                                                                                                                                                                           |
| <input type="checkbox"/>            | <input checked="" type="checkbox"/> The exact sample size ( <i>n</i> ) for each experimental group/condition, given as a discrete number and unit of measurement                                                                                                                    |
| <input type="checkbox"/>            | <input checked="" type="checkbox"/> A statement on whether measurements were taken from distinct samples or whether the same sample was measured repeatedly                                                                                                                         |
| <input checked="" type="checkbox"/> | <input type="checkbox"/> The statistical test(s) used AND whether they are one- or two-sided<br><i>Only common tests should be described solely by name; describe more complex techniques in the Methods section.</i>                                                               |
| <input checked="" type="checkbox"/> | <input type="checkbox"/> A description of all covariates tested                                                                                                                                                                                                                     |
| <input checked="" type="checkbox"/> | <input type="checkbox"/> A description of any assumptions or corrections, such as tests of normality and adjustment for multiple comparisons                                                                                                                                        |
| <input checked="" type="checkbox"/> | <input type="checkbox"/> A full description of the statistical parameters including central tendency (e.g. means) or other basic estimates (e.g. regression coefficient) AND variation (e.g. standard deviation) or associated estimates of uncertainty (e.g. confidence intervals) |
| <input type="checkbox"/>            | <input checked="" type="checkbox"/> For null hypothesis testing, the test statistic (e.g. <i>F</i> , <i>t</i> , <i>r</i> ) with confidence intervals, effect sizes, degrees of freedom and <i>P</i> value noted<br><i>Give P values as exact values whenever suitable.</i>          |
| <input type="checkbox"/>            | <input checked="" type="checkbox"/> For Bayesian analysis, information on the choice of priors and Markov chain Monte Carlo settings                                                                                                                                                |
| <input checked="" type="checkbox"/> | <input type="checkbox"/> For hierarchical and complex designs, identification of the appropriate level for tests and full reporting of outcomes                                                                                                                                     |
| <input checked="" type="checkbox"/> | <input type="checkbox"/> Estimates of effect sizes (e.g. Cohen's <i>d</i> , Pearson's <i>r</i> ), indicating how they were calculated                                                                                                                                               |

Our web collection on [statistics for biologists](#) contains articles on many of the points above.

Software and code

Policy information about [availability of computer code](#)

|                 |                                                                                                                                                                                                                                                                                                      |
|-----------------|------------------------------------------------------------------------------------------------------------------------------------------------------------------------------------------------------------------------------------------------------------------------------------------------------|
| Data collection | Ubuntu v22.04.3<br>Python v3.10.14<br>LocalColabFold v 1.5.0<br>MMseqs2 v14.7e284<br>Foldseek v6.29e2557<br>orfipy v0.0.3<br>Pymol v2.5.0<br>IQ-TREE v2.2.5<br>MAFFT v7.505<br>trimAl v1.4.1<br>BEAST v2.7.6<br>FigTree v1.4.4<br>Bowtie2 v2.5.3<br>samtools v1.20<br>iVar v1.4.2<br>TB-Tools v2.085 |
| Data analysis   | R version 4.2.3 - all analysis code is available in Figshare file<br>Anvi'o version 8                                                                                                                                                                                                                |

## Data

Policy information about [availability of data](#)

All manuscripts must include a [data availability statement](#). This statement should provide the following information, where applicable:

- Accession codes, unique identifiers, or web links for publicly available datasets
- A description of any restrictions on data availability
- For clinical datasets or third party data, please ensure that the statement adheres to our [policy](#)

Databases used in our study include:

NCBI RefSeq (<https://ftp.ncbi.nlm.nih.gov/refseq/>);  
 NCBI WGS (Whole Genome Shotgun) genomes (<https://ftp.ncbi.nlm.nih.gov/genbank/wgs/>);  
 NCBI TSA (Transcriptome Shotgun Assemblies) (<https://ftp.ncbi.nlm.nih.gov/genbank/tsa/>);  
 UniRef90 (<https://ftp.ebi.ac.uk/pub/databases/uniprot/uniref/uniref90/>);  
 National Genomics Data Center (<https://ngdc.cncb.ac.cn/>);  
 AlphaFold Protein Structure Database (<https://alphafold.ebi.ac.uk/>);  
 SpiderDB 1.0 (<https://spider.bioinfotoolkits.net>).

The high-throughput sequencing raw data of *A. ventricosus* genomic DNA were deposited into the Genome Sequence Archive (GSA) of the National Genomics Data Center and are available through accession number: CRA017441.

The original data generated in our study, including phylogenetic trees, predicted protein structures, custom codes, etc., have been made publicly available at Figshare.

## Research involving human participants, their data, or biological material

Policy information about studies with [human participants or human data](#). See also policy information about [sex, gender \(identity/presentation\), and sexual orientation](#) and [race, ethnicity and racism](#).

Reporting on sex and gender N/A

Reporting on race, ethnicity, or other socially relevant groupings N/A

Population characteristics N/A

Recruitment N/A

Ethics oversight N/A

Note that full information on the approval of the study protocol must also be provided in the manuscript.

## Field-specific reporting

Please select the one below that is the best fit for your research. If you are not sure, read the appropriate sections before making your selection.

☒ Life sciences ☐ Behavioural & social sciences ☐ Ecological, evolutionary & environmental sciences

For a reference copy of the document with all sections, see [nature.com/documents/nr-reporting-summary-flat.pdf](https://www.nature.com/documents/nr-reporting-summary-flat.pdf)

## Life sciences study design

All studies must disclose on these points even when the disclosure is negative.

Sample size The samples included all the accessible Refseq genomes of NALDVs, WGS data for Arachnida and TSA data for Araneae at the start of our study. The list of samples could be found in the supplementary tables.

Data exclusions The WGS data for Arachnida and TSA data for Araneae were obtained at June 2023. All the sequencing data that generated after our accession time were excluded.

Replication All computational pipelines were run successfully at least twice. The qRT-PCR samples was performed from three female spiders.

Randomization This study did not perform experiments that require sample randomization.

Blinding This study did not perform experiments that require blinding.

# Reporting for specific materials, systems and methods

We require information from authors about some types of materials, experimental systems and methods used in many studies. Here, indicate whether each material, system or method listed is relevant to your study. If you are not sure if a list item applies to your research, read the appropriate section before selecting a response.

## Materials & experimental systems

|                                     |                                                                 |
|-------------------------------------|-----------------------------------------------------------------|
| n/a                                 | Involved in the study                                           |
| <input checked="" type="checkbox"/> | <input type="checkbox"/> Antibodies                             |
| <input checked="" type="checkbox"/> | <input type="checkbox"/> Eukaryotic cell lines                  |
| <input checked="" type="checkbox"/> | <input type="checkbox"/> Palaeontology and archaeology          |
| <input type="checkbox"/>            | <input checked="" type="checkbox"/> Animals and other organisms |
| <input checked="" type="checkbox"/> | <input type="checkbox"/> Clinical data                          |
| <input checked="" type="checkbox"/> | <input type="checkbox"/> Dual use research of concern           |
| <input checked="" type="checkbox"/> | <input type="checkbox"/> Plants                                 |

## Methods

|                                     |                                                 |
|-------------------------------------|-------------------------------------------------|
| n/a                                 | Involved in the study                           |
| <input checked="" type="checkbox"/> | <input type="checkbox"/> ChIP-seq               |
| <input checked="" type="checkbox"/> | <input type="checkbox"/> Flow cytometry         |
| <input checked="" type="checkbox"/> | <input type="checkbox"/> MRI-based neuroimaging |

## Animals and other research organisms

Policy information about [studies involving animals](#); [ARRIVE guidelines](#) recommended for reporting animal research, and [Sex and Gender in Research](#)

|                         |                                                                                                                                                                                                                                                                                                                                                                                                                                                            |
|-------------------------|------------------------------------------------------------------------------------------------------------------------------------------------------------------------------------------------------------------------------------------------------------------------------------------------------------------------------------------------------------------------------------------------------------------------------------------------------------|
| Laboratory animals      | N/A                                                                                                                                                                                                                                                                                                                                                                                                                                                        |
| Wild animals            | The adult spiders ( <i>A. ventricosus</i> and <i>T. clavata</i> ) captured in Nanyang, Henan Province, China, were purchased via Taobao ( <a href="https://shop104568564.taobao.com">https://shop104568564.taobao.com</a> ). For <i>A. ventricosus</i> , the spiders were first immersed in liquid nitrogen and macerated prior to DNA extraction. For <i>T. clavata</i> , the fresh tissues of spiders were dissected in PBS and prior to RNA extraction. |
| Reporting on sex        | For <i>A. ventricosus</i> , individuals of both sexes were used to determine whether the spider nrEVs was present in both sexes. For <i>T. clavata</i> , only females were used for RNA extraction, because females are larger and easier to dissect, and have a greater variety of silk glands.                                                                                                                                                           |
| Field-collected samples | N/A                                                                                                                                                                                                                                                                                                                                                                                                                                                        |
| Ethics oversight        | N/A                                                                                                                                                                                                                                                                                                                                                                                                                                                        |

Note that full information on the approval of the study protocol must also be provided in the manuscript.

## Plants

|                       |     |
|-----------------------|-----|
| Seed stocks           | NA/ |
| Novel plant genotypes | N/A |
| Authentication        | N/A |
