# Supplementary material for: Discovery of novel non-retroviral endogenous viral elements reveals their long-term co-evolution with spiders
Source: Research Square preprint supplement (doi:10.21203/rs.3.rs-4996788/v1), 2024-10-15
Supplement: Supplementary file 1 [file 395415d0399ccc163bfd4fa5.xlsx]

## Sheet: Table S1
Supplementary Table 1. Baculoviral homologs founded in Araneus ventricosus by querying predicted baculoviral protein structures in AFDB50 via Foldseek
query	target	evalue	bits	alntmscore	prob	lddt	taxname	product
NC_001623.1_NP_054111.1	AF-A0A7X1LGN1-F1-model_v4	0.01208	77	0.3196	0.975	0.4809	Rhizobium sp. AQ_MP	AcOrf-81 peptide
NC_001623.1_NP_054111.1	AF-A0A2B4R9D1-F1-model_v4	0.02786	77	0.3651	0.975	0.4922	Stylophora pistillata	AcOrf-81 peptide
NC_001623.1_NP_054111.1	AF-A0A523LDD9-F1-model_v4	0.0423	74	0.3775	0.961	0.477	Gammaproteobacteria bacterium	AcOrf-81 peptide
NC_001623.1_NP_054111.1	AF-A0A2T5X3Q2-F1-model_v4	0.01445	70	0.2888	0.933	0.4518	Methylobacterium sp. GV104	AcOrf-81 peptide
NC_001623.1_NP_054111.1	AF-A0A327KIP9-F1-model_v4	0.02473	69	0.3101	0.923	0.4601	Rhodoplanes elegans	AcOrf-81 peptide
NC_001623.1_NP_054111.1	AF-A0A6A5EGQ3-F1-model_v4	0.1238	67	0.4317	0.9	0.4209	Perca fluviatilis	AcOrf-81 peptide
NC_001623.1_NP_054111.1	AF-A0A520H2T9-F1-model_v4	0.08154	67	0.3253	0.9	0.5105	Variovorax sp.	AcOrf-81 peptide
NC_001623.1_NP_054111.1	AF-A0A6M0SHH8-F1-model_v4	0.008967	65	0.2518	0.872	0.4219	Adonisia turfae CCMR0082	AcOrf-81 peptide
NC_001623.1_NP_054111.1	AF-A0A517LDL1-F1-model_v4	0.06051	64	0.3185	0.855	0.4472	Venturia effusa	AcOrf-81 peptide
NC_001623.1_NP_054111.1	AF-A0A1P8KDZ2-F1-model_v4	0.188	64	0.3739	0.855	0.4828	Rhodoferax saidenbachensis	AcOrf-81 peptide
NC_001623.1_NP_054111.1	AF-A0A4Z1P4T8-F1-model_v4	0.08154	62	0.2634	0.817	0.5367	Venturia nashicola	AcOrf-81 peptide
NC_001623.1_NP_054111.1	AF-A0A284S946-F1-model_v4	0.0537	61	0.2902	0.795	0.435	Armillaria ostoyae	AcOrf-81 peptide
NC_001623.1_NP_054111.1	AF-A0A5C7Q0I2-F1-model_v4	0.1572	58	0.2966	0.72	0.4946	Burkholderiaceae bacterium	AcOrf-81 peptide
NC_001623.1_NP_054111.1	AF-A0A3N5EMJ6-F1-model_v4	0.2118	57	0.3173	0.692	0.4678	Burkholderiales bacterium	AcOrf-81 peptide
NC_001623.1_NP_054111.1	AF-A0A7Y2FRN9-F1-model_v4	0.5841	56	0.4653	0.663	0.399	Hyphomicrobiales bacterium	AcOrf-81 peptide
NC_001623.1_NP_054111.1	AF-A0A5K7ZX14-F1-model_v4	0.3414	54	0.3953	0.601	0.3756	Desulfosarcina ovata subsp. sediminis	AcOrf-81 peptide
NC_001623.1_NP_054111.1	AF-S3URL5-F1-model_v4	0.05059	52	0.2294	0.537	0.396	Leptospira fainei serovar Hurstbridge str. BUT 6	AcOrf-81 peptide
NC_001623.1_NP_054111.1	AF-A0A077ZWJ8-F1-model_v4	0.5841	50	0.2876	0.473	0.5087	Stylonychia lemnae	AcOrf-81 peptide
NC_001623.1_NP_054111.1	AF-A0A2U0Y986-F1-model_v4	0.8869	49	0.3266	0.442	0.4848	Rhodoferax sp. YR267	AcOrf-81 peptide
NC_001623.1_NP_054111.1	AF-A0A0B1PNT1-F1-model_v4	0.09188	49	0.2045	0.442	0.4428	Trichuris suis	AcOrf-81 peptide
NC_001623.1_NP_054111.1	AF-A0A397QUA1-F1-model_v4	1.517	47	0.3439	0.382	0.4898	Pelomonas sp. BT06	AcOrf-81 peptide
NC_001623.1_NP_054111.1	AF-A0A4Q6BSX2-F1-model_v4	1.517	46	0.3432	0.353	0.4652	Proteobacteria bacterium	AcOrf-81 peptide
NC_001623.1_NP_054111.1	AF-A0A838QXF7-F1-model_v4	0.2387	46	0.203	0.353	0.4892	Pirellulales bacterium	AcOrf-81 peptide
NC_001623.1_NP_054111.1	AF-A0A2V8RCE6-F1-model_v4	0.9993	46	0.2668	0.353	0.5284	Acidobacteria bacterium	AcOrf-81 peptide
NC_001623.1_NP_054111.1	AF-A0A7I8KFZ6-F1-model_v4	0.1314	46	0.1907	0.353	0.4645	Spirodela intermedia	AcOrf-81 peptide
NC_001623.1_NP_054111.1	AF-A0A811LIQ5-F1-model_v4	3.713	45	0.3373	0.326	0.6004	Bursaphelenchus okinawaensis	AcOrf-81 peptide
NC_001623.1_NP_054111.1	AF-A0A7R9W4Z0-F1-model_v4	1.061	44	0.2714	0.301	0.4813	Pseudictyota dubia	AcOrf-81 peptide
NC_001623.1_NP_054111.1	AF-F9CVH9-F1-model_v4	1.429	44	0.2684	0.301	0.5283	Nitrosarchaeum koreense MY1	AcOrf-81 peptide
NC_001623.1_NP_054111.1	AF-A0A239DTM1-F1-model_v4	1.517	44	0.3305	0.301	0.4522	Dokdonia pacifica	AcOrf-81 peptide
NC_001623.1_NP_054111.1	AF-A0A3N5V8M7-F1-model_v4	0.2855	44	0.2049	0.301	0.4559	Verrucomicrobiaceae bacterium	AcOrf-81 peptide
NC_001623.1_NP_054111.1	AF-A0A2A6PUT9-F1-model_v4	0.7871	44	0.2593	0.301	0.4773	Bradyrhizobium sp. Y36	AcOrf-81 peptide
NC_001623.1_NP_054111.1	AF-A0A086T367-F1-model_v4	0.1572	44	0.1916	0.301	0.429	Acremonium chrysogenum ATCC 11550	AcOrf-81 peptide
NC_001623.1_NP_054111.1	AF-R6GQD3-F1-model_v4	0.62	43	0.217	0.277	0.501	Oscillibacter sp. CAG:241	AcOrf-81 peptide
NC_001623.1_NP_054111.1	AF-V2XDD9-F1-model_v4	0.4884	43	0.2216	0.277	0.4639	Moniliophthora roreri MCA 2997	AcOrf-81 peptide
NC_001623.1_NP_054111.1	AF-A7HBR7-F1-model_v4	0.7415	43	0.2318	0.277	0.5088	Anaeromyxobacter sp. Fw109-5	AcOrf-81 peptide
NC_001623.1_NP_054111.1	AF-A0A1J1IX91-F1-model_v4	1.061	43	0.255	0.277	0.4991	Clunio marinus	AcOrf-81 peptide
NC_001623.1_NP_054111.1	AF-A0A6G4WPP8-F1-model_v4	0.2533	42	0.1944	0.254	0.446	Streptomyces boncukensis	AcOrf-81 peptide
NC_001623.1_NP_054111.1	AF-G0MH42-F1-model_v4	0.4601	42	0.204	0.254	0.4777	Caenorhabditis brenneri	AcOrf-81 peptide
NC_001623.1_NP_054111.1	AF-A0A1F9XIY5-F1-model_v4	0.9414	42	0.2425	0.254	0.4763	Elusimicrobia bacterium RIFOXYB2_FULL_48_7	AcOrf-81 peptide
NC_001623.1_NP_054111.1	AF-A0A2E3K405-F1-model_v4	0.3624	42	0.2208	0.254	0.4148	Rhodospirillaceae bacterium	AcOrf-81 peptide
NC_001623.1_NP_054111.1	AF-A0A1Z4C584-F1-model_v4	1.195	42	0.2325	0.254	0.5361	Methylovulum psychrotolerans	AcOrf-81 peptide
NC_001623.1_NP_054111.1	AF-A0A2P5YQC5-F1-model_v4	0.3847	42	0.2131	0.254	0.4483	Gossypium barbadense	AcOrf-81 peptide
NC_001623.1_NP_054111.1	AF-A0A3P1CUJ6-F1-model_v4	2.596	42	0.303	0.254	0.5185	Larkinella knui	AcOrf-81 peptide
NC_001623.1_NP_054111.1	AF-A0A4R7Q592-F1-model_v4	0.9414	42	0.2272	0.254	0.5078	Gelidibacter sediminis	AcOrf-81 peptide
NC_001623.1_NP_054111.1	AF-A0A4R6T0L9-F1-model_v4	0.7871	42	0.235	0.254	0.4748	Pedobacter metabolipauper	AcOrf-81 peptide
NC_001623.1_NP_054111.1	AF-A0A2V3IGC4-F1-model_v4	2.596	42	0.2828	0.254	0.5532	Gracilariopsis chorda	AcOrf-81 peptide
NC_001623.1_NP_054111.1	AF-A0A6A7L485-F1-model_v4	1.061	42	0.2642	0.254	0.4624	Luteitalea sp.	AcOrf-81 peptide
NC_001623.1_NP_054111.1	AF-A0A328R272-F1-model_v4	0.5503	42	0.2485	0.254	0.4132	Candidatus Marinamargulisbacteria bacterium SCGC AG-343-D04	AcOrf-81 peptide
NC_001623.1_NP_054111.1	AF-A0A7U3LT22-F1-model_v4	3.105	42	0.3424	0.254	0.4945	Enterobacter roggenkampii	AcOrf-81 peptide
NC_001623.1_NP_054111.1	AF-A0A498ME51-F1-model_v4	0.303	41	0.1989	0.233	0.427	Labeo rohita	AcOrf-81 peptide
NC_001623.1_NP_054111.1	AF-A0A5J4TKH4-F1-model_v4	3.296	41	0.3086	0.233	0.5258	Streblomastix strix	AcOrf-81 peptide
NC_001623.1_NP_054111.1	AF-A0A7X1HGI7-F1-model_v4	1.71	41	0.2494	0.233	0.532	Rhizobium sp. AQ_MP	AcOrf-81 peptide
NC_001623.1_NP_054111.1	AF-A0A4Y7SXX3-F1-model_v4	0.2248	41	0.199	0.233	0.3923	Coprinellus micaceus	AcOrf-81 peptide
NC_001623.1_NP_054111.1	AF-A0A7W4F1M6-F1-model_v4	0.188	41	0.1735	0.233	0.439	Candidatus Saccharibacteria bacterium	AcOrf-81 peptide
NC_001623.1_NP_054111.1	AF-A0A0G4NK81-F1-model_v4	2.17	41	0.2997	0.233	0.4845	Verticillium longisporum	AcOrf-81 peptide
NC_001623.1_NP_054111.1	AF-A0A2X0KJ96-F1-model_v4	0.1481	40	0.1635	0.214	0.4269	Streptacidiphilus pinicola	AcOrf-81 peptide
NC_001623.1_NP_054111.1	AF-A0A521Z6U2-F1-model_v4	0.9993	40	0.2139	0.214	0.5172	Patescibacteria group bacterium	AcOrf-81 peptide
NC_001623.1_NP_054111.1	AF-A0A1Y1XEX5-F1-model_v4	1.126	40	0.2629	0.214	0.4273	Anaeromyces robustus	AcOrf-81 peptide
NC_001623.1_NP_054111.1	AF-A0A7X5CN11-F1-model_v4	0.8355	39	0.2523	0.196	0.3892	Clostridiaceae bacterium	AcOrf-81 peptide
NC_001623.1_NP_054111.1	AF-A0A0P7V5X3-F1-model_v4	0.9414	39	0.22	0.196	0.4665	Oceanicaulis sp. HLUCCA04	AcOrf-81 peptide
NC_001623.1_NP_054111.1	AF-A0A3D9SK92-F1-model_v4	2.304	39	0.2651	0.196	0.4982	Thermomonospora umbrina	AcOrf-81 peptide
NC_001623.1_NP_054111.1	AF-A0A3L6T5P7-F1-model_v4	2.925	39	0.2736	0.196	0.5152	Panicum miliaceum	AcOrf-81 peptide
NC_001623.1_NP_054111.1	AF-A0A819HWT0-F1-model_v4	1.71	39	0.2632	0.196	0.454	Rotaria sp. Silwood2	AcOrf-81 peptide
NC_001623.1_NP_054111.1	AF-A0A2N2JQN0-F1-model_v4	0.5841	39	0.1964	0.196	0.4667	Deltaproteobacteria bacterium HGW-Deltaproteobacteria-14	AcOrf-81 peptide
NC_001623.1_NP_054111.1	AF-A0A7X7SAH4-F1-model_v4	3.296	38	0.3007	0.179	0.4618	Lentisphaerae bacterium	AcOrf-81 peptide
NC_001623.1_NP_054111.1	AF-A0A7C4IAX0-F1-model_v4	1.611	38	0.2416	0.179	0.4726	Betaproteobacteria bacterium	AcOrf-81 peptide
NC_001623.1_NP_054111.1	AF-T1JGF1-F1-model_v4	0.3847	38	0.1747	0.179	0.4323	Strigamia maritima	AcOrf-81 peptide
NC_001623.1_NP_054111.1	AF-B2HKF5-F1-model_v4	0.9414	38	0.2207	0.179	0.4286	Mycobacterium marinum M	AcOrf-81 peptide
NC_001623.1_NP_054111.1	AF-K6UYN5-F1-model_v4	3.941	38	0.2828	0.179	0.5331	Plasmodium cynomolgi strain B	AcOrf-81 peptide
NC_001623.1_NP_054111.1	AF-A0A7V9P9U1-F1-model_v4	2.596	38	0.2616	0.179	0.4967	Acidobacteria bacterium	AcOrf-81 peptide
NC_001623.1_NP_054111.1	AF-A0A7S0RQH3-F1-model_v4	6.743	38	0.3476	0.179	0.508	Chlamydomonas leiostraca	AcOrf-81 peptide
NC_001623.1_NP_054111.1	AF-A0A3D1BMR9-F1-model_v4	0.3847	38	0.1982	0.179	0.3783	Nitrospiraceae bacterium	AcOrf-81 peptide
NC_001623.1_NP_054111.1	AF-A0A1Z5J9B3-F1-model_v4	1.269	38	0.2325	0.179	0.4557	Fistulifera solaris	AcOrf-81 peptide
NC_001623.1_NP_054111.1	AF-A0A6A8QJ58-F1-model_v4	0.2533	38	0.1519	0.179	0.4477	Telmatospirillum sp.	AcOrf-81 peptide
NC_001623.1_NP_054111.1	AF-A0A7G1H4D2-F1-model_v4	0.9993	38	0.2135	0.179	0.4508	Dissulfurispira thermophila	AcOrf-81 peptide
NC_001623.1_NP_054111.1	AF-A0A0R3PG81-F1-model_v4	0.06818	38	0.1371	0.179	0.3906	Angiostrongylus costaricensis	AcOrf-81 peptide
NC_001623.1_NP_054111.1	AF-A0A3L7Q331-F1-model_v4	1.195	38	0.2269	0.179	0.4641	Planctomycetota bacterium	AcOrf-81 peptide
NC_001623.1_NP_054111.1	AF-A0A811QYV2-F1-model_v4	8.065	38	0.3503	0.179	0.5565	Miscanthus lutarioriparius	AcOrf-81 peptide
NC_001623.1_NP_054111.1	AF-A0A1J5FNU5-F1-model_v4	2.304	38	0.2599	0.179	0.4814	Ignavibacteria bacterium CG2_30_36_16	AcOrf-81 peptide
NC_001623.1_NP_054111.1	AF-A0A2V9QMR6-F1-model_v4	0.8355	38	0.2209	0.179	0.4244	Acidobacteria bacterium	AcOrf-81 peptide
NC_001623.1_NP_054111.1	AF-A0A4Y2AAJ6-F1-model_v4	7.158	38	0.3096	0.179	0.5894	Araneus ventricosus	AcOrf-81 peptide
NC_001623.1_NP_054111.1	AF-A0A5A9PBZ6-F1-model_v4	4.714	38	0.3018	0.179	0.5152	Triplophysa tibetana	AcOrf-81 peptide
NC_001623.1_NP_054111.1	AF-A0A5J9UZI9-F1-model_v4	1.269	38	0.2191	0.179	0.4749	Eragrostis curvula	AcOrf-81 peptide
NC_001623.1_NP_054111.1	AF-A0A372IK36-F1-model_v4	0.4083	38	0.1783	0.179	0.4335	Paracidobacterium acidisoli	AcOrf-81 peptide
NC_001623.1_NP_054111.1	AF-A0A388LTX5-F1-model_v4	1.611	38	0.225	0.179	0.4964	Chara braunii	AcOrf-81 peptide
NC_001623.1_NP_054111.1	AF-A0A7M7IMU4-F1-model_v4	0.4884	37	0.1743	0.164	0.4481	Nasonia vitripennis	AcOrf-81 peptide
NC_001623.1_NP_054111.1	AF-W9QSH3-F1-model_v4	1.195	37	0.2137	0.164	0.4479	Morus notabilis	AcOrf-81 peptide
NC_001623.1_NP_054111.1	AF-A0A7Y7E7A1-F1-model_v4	0.9993	37	0.1934	0.164	0.4711	Streptomyces morookaense	AcOrf-81 peptide
NC_001623.1_NP_054111.1	AF-A0A4Z0WJ86-F1-model_v4	0.4884	37	0.1745	0.164	0.4399	Natronospirillum operosum	AcOrf-81 peptide
NC_001623.1_NP_054111.1	AF-A0A1U7R9E6-F1-model_v4	5.004	37	0.277	0.164	0.5646	Alligator sinensis	AcOrf-81 peptide
NC_001623.1_NP_054111.1	AF-A0A0A9YGM5-F1-model_v4	1.517	37	0.214	0.164	0.4826	Lygus hesperus	AcOrf-81 peptide
NC_001623.1_NP_054111.1	AF-U2E571-F1-model_v4	0.2248	37	0.1561	0.164	0.4145	Halorhabdus tiamatea SARL4B	AcOrf-81 peptide
NC_001623.1_NP_054111.1	AF-R5L0Q1-F1-model_v4	3.105	37	0.2455	0.164	0.5158	Clostridium sp. CAG:678	AcOrf-81 peptide
NC_001623.1_NP_054111.1	AF-A0A1F6VFG9-F1-model_v4	2.304	37	0.2555	0.164	0.4543	Candidatus Muproteobacteria bacterium RBG_16_60_9	AcOrf-81 peptide
NC_001623.1_NP_054111.1	AF-A0A519BIH9-F1-model_v4	1.611	37	0.2294	0.164	0.4615	Candidatus Acididesulfobacter guangdongensis	AcOrf-81 peptide
NC_001623.1_NP_054111.1	AF-K0SP88-F1-model_v4	0.5184	37	0.1874	0.164	0.4112	Thalassiosira oceanica	AcOrf-81 peptide
NC_001623.1_NP_054111.1	AF-A0A2H9TJG7-F1-model_v4	1.126	37	0.2129	0.164	0.4544	Paramicrosporidium saccamoebae	AcOrf-81 peptide
NC_001623.1_NP_054111.1	AF-A0A7R9DJA1-F1-model_v4	1.269	37	0.2177	0.164	0.446	Timema poppensis	AcOrf-81 peptide
NC_001623.1_NP_054111.1	AF-A0A448YNR8-F1-model_v4	1.71	37	0.2309	0.164	0.4586	Brettanomyces naardenensis	AcOrf-81 peptide
NC_001623.1_NP_054111.1	AF-F1KVM9-F1-model_v4	5.638	37	0.2986	0.164	0.5451	Ascaris suum	AcOrf-81 peptide
NC_001623.1_NP_054111.1	AF-A0A3S4QVX6-F1-model_v4	1.926	36	0.2351	0.15	0.4426	Chryseobacterium gleum	AcOrf-81 peptide
NC_001623.1_NP_054111.1	AF-A0A1Y2G9I2-F1-model_v4	0.4083	36	0.1693	0.15	0.4084	Lobosporangium transversale	AcOrf-81 peptide
NC_001623.1_NP_054111.1	AF-A0A1Y2I8Q6-F1-model_v4	1.195	36	0.2377	0.15	0.3837	Trametes coccinea BRFM310	AcOrf-81 peptide
NC_001623.1_NP_054111.1	AF-A0A2S6IUN1-F1-model_v4	0.4884	36	0.1679	0.15	0.4471	Kineococcus xinjiangensis	AcOrf-81 peptide
NC_001623.1_NP_054111.1	AF-A0A2E3Y362-F1-model_v4	0.4601	36	0.1948	0.15	0.3693	Crocinitomicaceae bacterium	AcOrf-81 peptide
NC_001623.1_NP_054111.1	AF-L8JZB5-F1-model_v4	3.105	36	0.3197	0.15	0.375	Fulvivirga imtechensis AK7	AcOrf-81 peptide
NC_001623.1_NP_054111.1	AF-B3PF14-F1-model_v4	6.743	36	0.3542	0.15	0.4583	Cellvibrio japonicus Ueda107	AcOrf-81 peptide
NC_001623.1_NP_054111.1	AF-A0A3A0CHL9-F1-model_v4	2.755	36	0.2531	0.15	0.4798	Planctomycetota bacterium	AcOrf-81 peptide
NC_001623.1_NP_054111.1	AF-A0A7C7Q1M2-F1-model_v4	1.926	36	0.2258	0.15	0.4633	Armatimonadetes bacterium	AcOrf-81 peptide
NC_001623.1_NP_054111.1	AF-A0A1M3N6G7-F1-model_v4	4.184	36	0.2616	0.15	0.5154	Myxococcales bacterium 68-20	AcOrf-81 peptide
NC_001623.1_NP_054111.1	AF-A0A1M6DYW5-F1-model_v4	0.6581	36	0.1793	0.15	0.4443	Nocardiopsis flavescens	AcOrf-81 peptide
NC_001623.1_NP_054111.1	AF-A0A6C0FNK9-F1-model_v4	0.6581	36	0.1766	0.15	0.4357	Cellulomonas sp. H30R-01	AcOrf-81 peptide
NC_001623.1_NP_054111.1	AF-A0A1H9SVW0-F1-model_v4	2.304	36	0.2306	0.15	0.4795	Rhizobium sp. NFR03	AcOrf-81 peptide
NC_001623.1_NP_054111.1	AF-A0A7X8HNI3-F1-model_v4	0.3847	36	0.1617	0.15	0.4307	Peptococcaceae bacterium	AcOrf-81 peptide
NC_001623.1_NP_054111.1	AF-A0A7S2RX99-F1-model_v4	9.087	36	0.3317	0.15	0.5549	Rhizochromulina marina	AcOrf-81 peptide
NC_001623.1_NP_054111.1	AF-A0A7R8AVK0-F1-model_v4	0.9414	36	0.205	0.15	0.4148	Luteitalea sp. TBR-22	AcOrf-81 peptide
NC_001623.1_NP_054111.1	AF-A0A484B2Y6-F1-model_v4	1.815	36	0.2151	0.15	0.4939	Drosophila navojoa	AcOrf-81 peptide
NC_001623.1_NP_054111.1	AF-A0A521WH20-F1-model_v4	2.445	36	0.2426	0.15	0.4826	Gammaproteobacteria bacterium	AcOrf-81 peptide
NC_001623.1_NP_054111.1	AF-A0A6P4BPP7-F1-model_v4	5.638	36	0.3208	0.15	0.4601	Arachis duranensis	AcOrf-81 peptide
NC_001623.1_NP_054111.1	AF-A0A062UU31-F1-model_v4	3.498	36	0.376	0.15	0.3363	Candidatus Methanoperedens nitroreducens	AcOrf-81 peptide
NC_001623.1_NP_054111.1	AF-A0A1G2KJX6-F1-model_v4	0.4601	36	0.1704	0.15	0.4139	Candidatus Sungbacteria bacterium RIFCSPHIGHO2_02_FULL_47_11	AcOrf-81 peptide
NC_001623.1_NP_054111.1	AF-L8H2Z0-F1-model_v4	5.985	36	0.272	0.15	0.5543	Acanthamoeba castellanii str. Neff	AcOrf-81 peptide
NC_001623.1_NP_054111.1	AF-A0A812MYE7-F1-model_v4	2.755	36	0.2388	0.15	0.4852	Symbiodinium sp. CCMP2592	AcOrf-81 peptide
NC_001623.1_NP_054111.1	AF-A0A1U7LT74-F1-model_v4	0.9414	36	0.2024	0.15	0.4288	Neolecta irregularis DAH-3	AcOrf-81 peptide
NC_001623.1_NP_054111.1	AF-C1A7D1-F1-model_v4	6.353	35	0.3314	0.138	0.4593	Gemmatimonas aurantiaca T-27	AcOrf-81 peptide
NC_001623.1_NP_054111.1	AF-A0A843R0E7-F1-model_v4	4.184	35	0.2359	0.138	0.5405	Limosilactobacillus fermentum	AcOrf-81 peptide
NC_001623.1_NP_054111.1	AF-A0A4Y0BRG1-F1-model_v4	2.755	35	0.2372	0.138	0.4824	Anopheles funestus	AcOrf-81 peptide
NC_001623.1_NP_054111.1	AF-A0A6J7H509-F1-model_v4	0.5841	35	0.1696	0.138	0.419	freshwater metagenome	AcOrf-81 peptide
NC_001623.1_NP_054111.1	AF-A0A2N3ZLU0-F1-model_v4	1.71	35	0.2037	0.138	0.4655	Streptomyces sp. OK885	AcOrf-81 peptide
NC_001623.1_NP_054111.1	AF-A0A1E7JXL6-F1-model_v4	0.303	35	0.1539	0.138	0.4099	Streptomyces oceani	AcOrf-81 peptide
NC_001623.1_NP_054111.1	AF-A0A6P8SW17-F1-model_v4	0.07237	35	0.1189	0.138	0.379	Gymnodraco acuticeps	AcOrf-81 peptide
NC_001623.1_NP_054111.1	AF-A0A6I6DHS9-F1-model_v4	0.7415	35	0.1829	0.138	0.4313	Candidatus Syntrophocurvum alkaliphilum	AcOrf-81 peptide
NC_001623.1_NP_054111.1	AF-A0A553ZPY3-F1-model_v4	0.2855	35	0.1402	0.138	0.4293	Streptomyces benahoarensis	AcOrf-81 peptide
NC_001623.1_NP_054111.1	AF-A0A1Q3EAM3-F1-model_v4	1.061	35	0.1991	0.138	0.4196	Lentinula edodes	AcOrf-81 peptide
NC_001623.1_NP_054111.1	AF-A0A3D3W8K1-F1-model_v4	0.4601	35	0.1502	0.138	0.4418	Peptococcaceae bacterium	AcOrf-81 peptide
NC_001623.1_NP_054111.1	AF-I4B8Q9-F1-model_v4	3.713	35	0.2367	0.138	0.5349	Turneriella parva DSM 21527	AcOrf-81 peptide
NC_001623.1_NP_054111.1	AF-A0A355X4Q9-F1-model_v4	4.184	35	0.2626	0.138	0.4968	Oscillospiraceae bacterium	AcOrf-81 peptide
NC_001623.1_NP_054111.1	AF-A0A838F416-F1-model_v4	2.17	35	0.2151	0.138	0.4812	Chitinophagales bacterium	AcOrf-81 peptide
NC_001623.1_NP_054111.1	AF-A0A5S4ZY33-F1-model_v4	1.061	35	0.175	0.138	0.4903	Desulfallas thermosapovorans DSM 6562	AcOrf-81 peptide
NC_001623.1_NP_054111.1	AF-A0A7C6J811-F1-model_v4	1.429	35	0.2	0.138	0.4476	Peptococcaceae bacterium	AcOrf-81 peptide
NC_001623.1_NP_054111.1	AF-A0A1J5CZ81-F1-model_v4	0.8355	35	0.203	0.138	0.4002	Deltaproteobacteria bacterium CG2_30_43_15	AcOrf-81 peptide
NC_001623.1_NP_054111.1	AF-A0A4R1HJ24-F1-model_v4	2.304	35	0.2278	0.138	0.4735	Thiogranum longum	AcOrf-81 peptide
NC_001623.1_NP_054111.1	AF-D1CC35-F1-model_v4	1.347	35	0.1979	0.138	0.4495	Thermobaculum terrenum ATCC BAA-798	AcOrf-81 peptide
NC_001623.1_NP_054111.1	AF-A0A1Z5L592-F1-model_v4	0.5503	35	0.1603	0.138	0.4543	Ornithodoros moubata	AcOrf-81 peptide
NC_001623.1_NP_054111.1	AF-A0A6A5HJJ4-F1-model_v4	1.926	35	0.2124	0.138	0.4692	Caenorhabditis remanei	AcOrf-81 peptide
NC_001623.1_NP_054111.1	AF-A0A1J5PV20-F1-model_v4	4.184	35	0.2645	0.138	0.4876	mine drainage metagenome	AcOrf-81 peptide
NC_001623.1_NP_054111.1	AF-A0A5Q4EXR2-F1-model_v4	0.6986	35	0.1664	0.138	0.4491	Gammaproteobacteria bacterium	AcOrf-81 peptide
NC_001623.1_NP_054111.1	AF-A0A7Y5CM28-F1-model_v4	1.611	35	0.1986	0.138	0.4821	candidate division KSB1 bacterium	AcOrf-81 peptide
NC_001623.1_NP_054111.1	AF-A0A7S3Y0X5-F1-model_v4	0.5841	35	0.1585	0.138	0.4448	Heterosigma akashiwo	AcOrf-81 peptide
NC_001623.1_NP_054111.1	AF-A0A2G5CYJ8-F1-model_v4	3.713	35	0.2403	0.138	0.5056	Aquilegia coerulea	AcOrf-81 peptide
NC_001623.1_NP_054111.1	AF-A0A8B5WDL0-F1-model_v4	1.195	35	0.1928	0.138	0.4513	Wenzhouxiangella sp.	AcOrf-81 peptide
NC_001623.1_NP_054111.1	AF-A0A3M2SZI7-F1-model_v4	1.611	35	0.1945	0.138	0.4819	Aspergillus sp. HF37	AcOrf-81 peptide
NC_001623.1_NP_054111.1	AF-K0T9D7-F1-model_v4	0.6986	35	0.1865	0.138	0.4032	Thalassiosira oceanica	AcOrf-81 peptide
NC_001623.1_NP_054111.1	AF-A0A3L6DZV0-F1-model_v4	0.4083	35	0.1655	0.138	0.4033	Zea mays	AcOrf-81 peptide
NC_001623.1_NP_054111.1	AF-A0A813APD5-F1-model_v4	4.184	35	0.2565	0.138	0.5067	Symbiodinium microadriaticum	AcOrf-81 peptide
NC_001623.1_NP_054111.1	AF-A0A024GRA0-F1-model_v4	3.105	35	0.2402	0.138	0.4726	Albugo candida	AcOrf-81 peptide
NC_001623.1_NP_054111.1	AF-A0A4S2KGF7-F1-model_v4	2.755	35	0.236	0.138	0.4697	Temnothorax longispinosus	AcOrf-81 peptide
NC_001623.1_NP_054111.1	AF-A0A662X9G1-F1-model_v4	2.925	35	0.25	0.138	0.4487	Nothophytophthora sp. Chile5	AcOrf-81 peptide
NC_001623.1_NP_054111.1	AF-A0A4S4KHB3-F1-model_v4	1.815	35	0.2235	0.138	0.449	Hermanssonia centrifuga	AcOrf-81 peptide
NC_001623.1_NP_054111.1	AF-G3NF47-F1-model_v4	1.347	34	0.2234	0.126	0.3762	Gasterosteus aculeatus	AcOrf-81 peptide
NC_001623.1_NP_054111.1	AF-A0A7W6N8S6-F1-model_v4	0.4884	34	0.1644	0.126	0.3858	Microvirga flocculans	AcOrf-81 peptide
NC_001623.1_NP_054111.1	AF-Q01607-F1-model_v4	0.5841	34	0.1737	0.126	0.3951	Oenothera elata subsp. hookeri	AcOrf-81 peptide
NC_001623.1_NP_054111.1	AF-T1F4P2-F1-model_v4	1.347	34	0.2196	0.126	0.383	Helobdella robusta	AcOrf-81 peptide
NC_001623.1_NP_054111.1	AF-A0A5C5UQ00-F1-model_v4	1.611	34	0.2003	0.126	0.4437	Corynebacterium canis	AcOrf-81 peptide
NC_001623.1_NP_054111.1	AF-A0A7W8DQQ5-F1-model_v4	3.498	34	0.2544	0.126	0.462	Prosthecobacter dejongeii	AcOrf-81 peptide
NC_001623.1_NP_054111.1	AF-A0A815BK54-F1-model_v4	7.158	34	0.2832	0.126	0.5055	Adineta steineri	AcOrf-81 peptide
NC_001623.1_NP_054111.1	AF-A0A2W2EB81-F1-model_v4	0.5841	34	0.155	0.126	0.4329	Nonomuraea aridisoli	AcOrf-81 peptide
NC_001623.1_NP_054111.1	AF-A0A2D7BZ10-F1-model_v4	2.925	34	0.2441	0.126	0.4319	Euryarchaeota archaeon	AcOrf-81 peptide
NC_001623.1_NP_054111.1	AF-A0A4R3QBP4-F1-model_v4	1.815	34	0.2041	0.126	0.4587	Rhizobium laguerreae	AcOrf-81 peptide
NC_001623.1_NP_054111.1	AF-A0A3B8LCT0-F1-model_v4	1.269	34	0.2028	0.126	0.4057	Myxococcales bacterium	AcOrf-81 peptide
NC_001623.1_NP_054111.1	AF-A0A0E0NS48-F1-model_v4	0.9414	34	0.2126	0.126	0.3592	Oryza rufipogon	AcOrf-81 peptide
NC_001623.1_NP_054111.1	AF-A0A813F6U8-F1-model_v4	3.296	34	0.2201	0.126	0.4951	Polarella glacialis	AcOrf-81 peptide
NC_001623.1_NP_054111.1	AF-A0A2W5UNB5-F1-model_v4	2.596	34	0.214	0.126	0.474	Archangium gephyra	AcOrf-81 peptide
NC_001623.1_NP_054111.1	AF-A0A1J4JSQ6-F1-model_v4	0.62	34	0.1741	0.126	0.4035	Tritrichomonas foetus	AcOrf-81 peptide
NC_001623.1_NP_054111.1	AF-A0A359B5J3-F1-model_v4	1.347	34	0.1851	0.126	0.4738	Desulfotomaculum sp.	AcOrf-81 peptide
NC_001623.1_NP_054111.1	AF-A0A7T9DU75-F1-model_v4	1.926	34	0.2176	0.126	0.439	Sphingobacteriales bacterium	AcOrf-81 peptide
NC_001623.1_NP_054111.1	AF-A0A2C6CQM0-F1-model_v4	1.347	34	0.1937	0.126	0.4361	Lewinellaceae bacterium SD302	AcOrf-81 peptide
NC_001623.1_NP_054111.1	AF-A0A2E3MBY8-F1-model_v4	0.2855	34	0.152	0.126	0.3871	Euryarchaeota archaeon	AcOrf-81 peptide
NC_001623.1_NP_054111.1	AF-A0A563BF16-F1-model_v4	0.62	34	0.1565	0.126	0.4534	TM7 phylum sp. oral taxon 351	AcOrf-81 peptide
NC_001623.1_NP_054111.1	AF-A0A1I7FMZ1-F1-model_v4	1.815	34	0.1867	0.126	0.4926	Eubacterium pyruvativorans	AcOrf-81 peptide
NC_001623.1_NP_054111.1	AF-R5HNC7-F1-model_v4	1.195	34	0.1729	0.126	0.4853	Roseburia inulinivorans CAG:15	AcOrf-81 peptide
NC_001623.1_NP_054111.1	AF-A0A4V1M550-F1-model_v4	9.087	34	0.3002	0.126	0.5345	Tremella mesenterica	AcOrf-81 peptide
NC_001623.1_NP_054111.1	AF-A0A2V9REV7-F1-model_v4	1.061	34	0.1855	0.126	0.4274	Acidobacteria bacterium	AcOrf-81 peptide
NC_001623.1_NP_054111.1	AF-A0A2V2RE78-F1-model_v4	1.517	34	0.1953	0.126	0.4435	Acidobacteria bacterium	AcOrf-81 peptide
NC_001623.1_NP_054111.1	AF-A0A2M6W4N3-F1-model_v4	0.6581	33	0.1699	0.116	0.3955	Candidatus Magasanikbacteria bacterium CG10_big_fil_rev_8_21_14_0_10_40_10	AcOrf-81 peptide
NC_001623.1_NP_054111.1	AF-A0A1C6MAT6-F1-model_v4	4.184	33	0.2545	0.116	0.4547	Variovorax sp. HW608	AcOrf-81 peptide
NC_001623.1_NP_054111.1	AF-A0A1H2EE66-F1-model_v4	1.815	33	0.2134	0.116	0.4105	Verrucomicrobium sp. GAS474	AcOrf-81 peptide
NC_001623.1_NP_054111.1	AF-A0A3M1CVS0-F1-model_v4	1.347	33	0.2081	0.116	0.3888	Deltaproteobacteria bacterium	AcOrf-81 peptide
NC_001623.1_NP_054111.1	AF-A0A1A9YCF6-F1-model_v4	1.926	33	0.2165	0.116	0.4059	Glossina fuscipes fuscipes	AcOrf-81 peptide
NC_001623.1_NP_054111.1	AF-A0A7R9Z5R1-F1-model_v4	2.445	33	0.2066	0.116	0.4592	Pseudictyota dubia	AcOrf-81 peptide
NC_001623.1_NP_054111.1	AF-A0A2D5QQM6-F1-model_v4	3.713	33	0.2496	0.116	0.4305	Myxococcales bacterium	AcOrf-81 peptide
NC_001623.1_NP_054111.1	AF-A0A7J6N940-F1-model_v4	1.517	33	0.1813	0.116	0.4668	Perkinsus olseni	AcOrf-81 peptide
NC_001623.1_NP_054111.1	AF-A0A1V1T4P1-F1-model_v4	2.925	33	0.2228	0.116	0.4584	Xylariales sp. No.14919	AcOrf-81 peptide
NC_001623.1_NP_054111.1	AF-A0A2M6X570-F1-model_v4	1.517	33	0.195	0.116	0.4162	Bdellovibrionales bacterium CG10_big_fil_rev_8_21_14_0_10_45_34	AcOrf-81 peptide
NC_001623.1_NP_054111.1	AF-A0A146GE56-F1-model_v4	5.312	33	0.2629	0.116	0.4741	Terrimicrobium sacchariphilum	AcOrf-81 peptide
NC_001623.1_NP_054111.1	AF-A0A7T9GJS6-F1-model_v4	0.7871	33	0.1884	0.116	0.376	Acidobacteria bacterium	AcOrf-81 peptide
NC_001623.1_NP_054111.1	AF-A0A1L8HJP6-F1-model_v4	2.304	33	0.2053	0.116	0.4513	Xenopus laevis	AcOrf-81 peptide
NC_001623.1_NP_054111.1	AF-A0A816RI64-F1-model_v4	2.304	33	0.2205	0.116	0.4323	Brassica napus	AcOrf-81 peptide
NC_001623.1_NP_054111.1	AF-A0A2V8ZI89-F1-model_v4	3.296	33	0.224	0.116	0.4722	Acidobacteria bacterium	AcOrf-81 peptide
NC_001623.1_NP_054111.1	AF-A0A4D7QKU0-F1-model_v4	3.105	33	0.2326	0.116	0.4368	Phreatobacter sp. NMCR1094	AcOrf-81 peptide
NC_001623.1_NP_054111.1	AF-A0A1F7RP58-F1-model_v4	5.638	33	0.2996	0.116	0.4276	Candidatus Schekmanbacteria bacterium RBG_13_48_7	AcOrf-81 peptide
NC_001623.1_NP_054111.1	AF-A0A2V5PYT9-F1-model_v4	2.045	33	0.1984	0.116	0.4546	Verrucomicrobia bacterium	AcOrf-81 peptide
NC_001623.1_NP_054111.1	AF-W4K6V2-F1-model_v4	0.5503	33	0.1616	0.116	0.3947	Heterobasidion irregulare TC 32-1	AcOrf-81 peptide
NC_001623.1_NP_054111.1	AF-A0A813E8V1-F1-model_v4	0.5503	33	0.1575	0.116	0.4019	Polarella glacialis	AcOrf-81 peptide
NC_001623.1_NP_054111.1	AF-A0A1V6ANM9-F1-model_v4	2.17	33	0.1984	0.116	0.4645	Deltaproteobacteria bacterium ADurb.Bin151	AcOrf-81 peptide
NC_001623.1_NP_054111.1	AF-U3JX67-F1-model_v4	3.713	33	0.2317	0.116	0.4632	Ficedula albicollis	AcOrf-81 peptide
NC_001623.1_NP_054111.1	AF-A0A7S2VHF5-F1-model_v4	0.9993	33	0.1707	0.116	0.4222	Skeletonema marinoi	AcOrf-81 peptide
NC_001623.1_NP_054111.1	AF-R4YWG1-F1-model_v4	0.7871	33	0.1497	0.116	0.4575	Candidatus Microthrix parvicella RN1	AcOrf-81 peptide
NC_001623.1_NP_054111.1	AF-A0A0Q7JKM2-F1-model_v4	2.445	33	0.2074	0.116	0.4507	Angustibacter sp. Root456	AcOrf-81 peptide
NC_001623.1_NP_054111.1	AF-A0A7S4VUK5-F1-model_v4	4.184	33	0.2289	0.116	0.5001	Alexandrium monilatum	AcOrf-81 peptide
NC_001623.1_NP_054111.1	AF-J1I5G5-F1-model_v4	3.498	33	0.2223	0.116	0.4752	Saprospira grandis DSM 2844	AcOrf-81 peptide
NC_001623.1_NP_054111.1	AF-A0A7W1JLH7-F1-model_v4	1.926	33	0.2094	0.116	0.438	Parachlamydiaceae bacterium	AcOrf-81 peptide
NC_001623.1_NP_054111.1	AF-A0A673INS9-F1-model_v4	5.312	33	0.2552	0.116	0.4934	Sinocyclocheilus rhinocerous	AcOrf-81 peptide
NC_001623.1_NP_054111.1	AF-A0A849K983-F1-model_v4	3.498	32	0.2253	0.106	0.4438	Ramlibacter sp. B156	AcOrf-81 peptide
NC_001623.1_NP_054111.1	AF-A0A182IXC4-F1-model_v4	1.429	32	0.1835	0.106	0.4236	Anopheles atroparvus	AcOrf-81 peptide
NC_001623.1_NP_054111.1	AF-A0A554IZN7-F1-model_v4	1.611	32	0.2103	0.106	0.3902	Parcubacteria group bacterium Greene0416_14	AcOrf-81 peptide
NC_001623.1_NP_054111.1	AF-E5XND2-F1-model_v4	1.926	32	0.1733	0.106	0.49	Segniliparus rugosus ATCC BAA-974	AcOrf-81 peptide
NC_001623.1_NP_054111.1	AF-A0A2S6TK48-F1-model_v4	0.9993	32	0.1565	0.106	0.451	Alphaproteobacteria bacterium MarineAlpha3_Bin3	AcOrf-81 peptide
NC_001623.1_NP_054111.1	AF-A0A5E6NQA7-F1-model_v4	4.184	32	0.2369	0.106	0.4641	uncultured Gammaproteobacteria bacterium	AcOrf-81 peptide
NC_001623.1_NP_054111.1	AF-A0A7R9D7C9-F1-model_v4	0.5184	32	0.155	0.106	0.3859	Timema cristinae	AcOrf-81 peptide
NC_001623.1_NP_054111.1	AF-A0A519E229-F1-model_v4	3.713	32	0.2269	0.106	0.4519	Rubrivivax sp.	AcOrf-81 peptide
NC_001623.1_NP_054111.1	AF-A0A7R9K7R3-F1-model_v4	1.815	32	0.181	0.106	0.4435	Timema genevievae	AcOrf-81 peptide
NC_001623.1_NP_054111.1	AF-V6ATY5-F1-model_v4	5.312	32	0.24	0.106	0.4804	Candidatus Nitrosotenuis uzonensis	AcOrf-81 peptide
NC_001623.1_NP_054111.1	AF-A0A2N2Y182-F1-model_v4	0.2533	32	0.1495	0.106	0.3304	Bacteroidetes bacterium HGW-Bacteroidetes-21	AcOrf-81 peptide
NC_001623.1_NP_054111.1	AF-A0A7C5JB45-F1-model_v4	8.065	32	0.2617	0.106	0.5172	Gammaproteobacteria bacterium	AcOrf-81 peptide
NC_001623.1_NP_054111.1	AF-A0A2T6D2Q0-F1-model_v4	0.7871	32	0.1762	0.106	0.3633	Spartobacteria bacterium LR76	AcOrf-81 peptide
NC_001623.1_NP_054111.1	AF-A8UK28-F1-model_v4	2.755	32	0.2073	0.106	0.4533	Flavobacteriales bacterium ALC-1	AcOrf-81 peptide
NC_001623.1_NP_054111.1	AF-A0A3C1HP79-F1-model_v4	6.353	32	0.2632	0.106	0.4787	Alcanivorax sp.	AcOrf-81 peptide
NC_001623.1_NP_054111.1	AF-A0A7V3L102-F1-model_v4	0.9414	32	0.1769	0.106	0.3806	Deltaproteobacteria bacterium	AcOrf-81 peptide
NC_001623.1_NP_054111.1	AF-A0A7Y0CMA8-F1-model_v4	1.061	32	0.167	0.106	0.4282	Rhodoferax sp.	AcOrf-81 peptide
NC_001623.1_NP_054111.1	AF-A0A2F0ARQ3-F1-model_v4	1.195	32	0.1864	0.106	0.3852	Myxococcales bacterium	AcOrf-81 peptide
NC_001623.1_NP_054111.1	AF-A0A347SQJ2-F1-model_v4	4.184	32	0.2241	0.106	0.481	Bombilactobacillus bombi	AcOrf-81 peptide
NC_001623.1_NP_054111.1	AF-A0A554GD84-F1-model_v4	6.743	32	0.2487	0.106	0.5136	Corallococcus sp. Z5C101001	AcOrf-81 peptide
NC_001623.1_NP_054111.1	AF-A0A1V5NX78-F1-model_v4	1.269	32	0.1647	0.106	0.4488	Firmicutes bacterium ADurb.Bin373	AcOrf-81 peptide
NC_001623.1_NP_054111.1	AF-A0A7H4NBJ5-F1-model_v4	1.429	32	0.1626	0.106	0.4639	Klebsiella michiganensis	AcOrf-81 peptide
NC_001623.1_NP_054111.1	AF-Q7MK36-F1-model_v4	2.925	32	0.2094	0.106	0.4509	Vibrio vulnificus YJ016	AcOrf-81 peptide
NC_001623.1_NP_054111.1	AF-A0A3L7T836-F1-model_v4	4.714	32	0.2456	0.106	0.4643	Planctomycetota bacterium	AcOrf-81 peptide
NC_001623.1_NP_054111.1	AF-A0A7J7AMX2-F1-model_v4	2.445	32	0.2059	0.106	0.4509	Lamprigera yunnana	AcOrf-81 peptide
NC_001623.1_NP_054111.1	AF-A0A2E7UQL1-F1-model_v4	0.4601	32	0.1418	0.106	0.3979	Deltaproteobacteria bacterium	AcOrf-81 peptide
NC_001623.1_NP_054111.1	AF-A0A4Q9FII2-F1-model_v4	9.087	32	0.2802	0.106	0.4989	Hyunsoonleella flava	AcOrf-81 peptide
NC_001623.1_NP_054111.1	AF-A0A2H0RN91-F1-model_v4	0.62	32	0.152	0.106	0.4032	Candidatus Uhrbacteria bacterium CG10_big_fil_rev_8_21_14_0_10_50_16	AcOrf-81 peptide
NC_001623.1_NP_054111.1	AF-A0A542X950-F1-model_v4	3.296	32	0.2014	0.106	0.5076	Barrientosiimonas humi	AcOrf-81 peptide
NC_001623.1_NP_054111.1	AF-A0A0P1BG08-F1-model_v4	0.9414	32	0.1699	0.106	0.4004	Ceraceosorus bombacis	AcOrf-81 peptide
NC_001623.1_NP_054111.1	AF-A0A833RX49-F1-model_v4	8.065	32	0.2701	0.106	0.5103	Frieseomelitta varia	AcOrf-81 peptide
NC_001623.1_NP_054111.1	AF-A0A0M0JXC1-F1-model_v4	0.9414	32	0.1949	0.106	0.3495	Chrysochromulina tobinii	AcOrf-81 peptide
NC_001623.1_NP_054111.1	AF-A0A1X2H3X3-F1-model_v4	4.714	32	0.2282	0.106	0.4875	Syncephalastrum racemosum	AcOrf-81 peptide
NC_001623.1_NP_054111.1	AF-A0A4Q1SZI4-F1-model_v4	1.71	31	0.2104	0.098	0.3614	Ammoniphilus sp. CFH 90114	AcOrf-81 peptide
NC_001623.1_NP_054111.1	AF-A0A3N5Y5S7-F1-model_v4	5.004	31	0.2572	0.098	0.4191	Alteromonas sediminis	AcOrf-81 peptide
NC_001623.1_NP_054111.1	AF-A0A1M9G5Y3-F1-model_v4	3.105	31	0.1906	0.098	0.4714	Mycobacteroides abscessus subsp. abscessus	AcOrf-81 peptide
NC_001623.1_NP_054111.1	AF-A0A1V1PDY5-F1-model_v4	2.925	31	0.199	0.098	0.4536	Candidatus Magnetoglobus multicellularis str. Araruama	AcOrf-81 peptide
NC_001623.1_NP_054111.1	AF-A0A671T983-F1-model_v4	0.8355	31	0.1714	0.098	0.3638	Sinocyclocheilus anshuiensis	AcOrf-81 peptide
NC_001623.1_NP_054111.1	AF-A0A521H2F1-F1-model_v4	1.429	31	0.1753	0.098	0.4085	Alphaproteobacteria bacterium	AcOrf-81 peptide
NC_001623.1_NP_054111.1	AF-A0A2C9JYM7-F1-model_v4	0.7871	31	0.1586	0.098	0.3974	Biomphalaria glabrata	AcOrf-81 peptide
NC_001623.1_NP_054111.1	AF-M3B687-F1-model_v4	1.611	31	0.1882	0.098	0.4062	Streptomyces mobaraensis NBRC 13819 = DSM 40847	AcOrf-81 peptide
NC_001623.1_NP_054111.1	AF-A0A139H622-F1-model_v4	5.638	31	0.2377	0.098	0.4668	Pseudocercospora eumusae	AcOrf-81 peptide
NC_001623.1_NP_054111.1	AF-A0A1M3DTC5-F1-model_v4	0.9993	31	0.1524	0.098	0.4319	Alphaproteobacteria bacterium 43-37	AcOrf-81 peptide
NC_001623.1_NP_054111.1	AF-B9XB83-F1-model_v4	3.713	31	0.2113	0.098	0.4492	Pedosphaera parvula Ellin514	AcOrf-81 peptide
NC_001623.1_NP_054111.1	AF-A0A0A9YY32-F1-model_v4	0.8869	31	0.1683	0.098	0.37	Lygus hesperus	AcOrf-81 peptide
NC_001623.1_NP_054111.1	AF-A0A5M3MTM3-F1-model_v4	1.926	31	0.1936	0.098	0.4098	Coniophora puteana RWD-64-598 SS2	AcOrf-81 peptide
NC_001623.1_NP_054111.1	AF-A0A843RW21-F1-model_v4	4.184	31	0.2139	0.098	0.4801	Luteitalea sp.	AcOrf-81 peptide
NC_001623.1_NP_054111.1	AF-R4L8Z7-F1-model_v4	3.713	31	0.1908	0.098	0.496	Actinoplanes sp. N902-109	AcOrf-81 peptide
NC_001623.1_NP_054111.1	AF-A0A7J5XSC7-F1-model_v4	0.9993	31	0.266	0.098	0.2524	Dissostichus mawsoni	AcOrf-81 peptide
NC_001623.1_NP_054111.1	AF-A0A6C0XZS0-F1-model_v4	5.985	31	0.2469	0.098	0.4747	Acinetobacter indicus	AcOrf-81 peptide
NC_001623.1_NP_054111.1	AF-A0A1Q6NMB7-F1-model_v4	3.105	31	0.2058	0.098	0.444	Eubacterium sp. 38_16	AcOrf-81 peptide
NC_001623.1_NP_054111.1	AF-A0A7C7U3W9-F1-model_v4	4.441	31	0.2387	0.098	0.4392	Myxococcales bacterium	AcOrf-81 peptide
NC_001623.1_NP_054111.1	AF-K8E9V2-F1-model_v4	3.498	31	0.1962	0.098	0.4728	Bathycoccus prasinos	AcOrf-81 peptide
NC_001623.1_NP_054111.1	AF-A0A6N2N778-F1-model_v4	1.71	31	0.1766	0.098	0.4357	Salix viminalis	AcOrf-81 peptide
NC_001623.1_NP_054111.1	AF-A0A834T0U7-F1-model_v4	0.62	31	0.143	0.098	0.4069	Senna tora	AcOrf-81 peptide
NC_001623.1_NP_054111.1	AF-A0A1G6HLH3-F1-model_v4	0.6581	31	0.1526	0.098	0.3848	Streptomyces sp. LaPpAH-199	AcOrf-81 peptide
NC_001623.1_NP_054111.1	AF-A0A450TTM5-F1-model_v4	0.7871	31	0.1609	0.098	0.375	Candidatus Kentron sp. FW	AcOrf-81 peptide
NC_001623.1_NP_054111.1	AF-A0A3L7VUT3-F1-model_v4	2.445	31	0.1865	0.098	0.4667	Planctomycetota bacterium	AcOrf-81 peptide
NC_001623.1_NP_054111.1	AF-A0A2T4IRP7-F1-model_v4	2.596	31	0.2509	0.098	0.3448	Mesorhizobium helmanticense	AcOrf-81 peptide
NC_001623.1_NP_054111.1	AF-A0A1V1RHA6-F1-model_v4	2.17	31	0.1804	0.098	0.4427	Coriobacteriaceae bacterium EMTCatB1	AcOrf-81 peptide
NC_001623.1_NP_054111.1	AF-A0A5J9SHR9-F1-model_v4	1.061	31	0.171	0.098	0.3989	Eragrostis curvula	AcOrf-81 peptide
NC_001623.1_NP_054111.1	AF-A0A4P9WTE6-F1-model_v4	2.596	31	0.242	0.098	0.3532	Caulochytrium protostelioides	AcOrf-81 peptide
NC_001623.1_NP_054111.1	AF-E4Z6B7-F1-model_v4	1.517	31	0.1654	0.098	0.4494	Oikopleura dioica	AcOrf-81 peptide
NC_001623.1_NP_054111.1	AF-E4X475-F1-model_v4	2.304	31	0.1947	0.098	0.433	Oikopleura dioica	AcOrf-81 peptide
NC_001623.1_NP_054111.1	AF-L8H9R9-F1-model_v4	8.065	31	0.2852	0.098	0.4517	Acanthamoeba castellanii str. Neff	AcOrf-81 peptide
NC_001623.1_NP_054111.1	AF-A0A1Q3PA40-F1-model_v4	5.638	30	0.3566	0.09	0.2868	Dyadobacter sp. 50-39	AcOrf-81 peptide
NC_001623.1_NP_054111.1	AF-A0A257KJB1-F1-model_v4	1.815	30	0.1877	0.09	0.383	Bradyrhizobiaceae bacterium PARB1	AcOrf-81 peptide
NC_001623.1_NP_054111.1	AF-A0A1X1PS44-F1-model_v4	0.9414	30	0.1582	0.09	0.38	Frankia casuarinae	AcOrf-81 peptide
NC_001623.1_NP_054111.1	AF-A0A182VIW1-F1-model_v4	2.045	30	0.1947	0.09	0.3887	Anopheles merus	AcOrf-81 peptide
NC_001623.1_NP_054111.1	AF-W5J3J5-F1-model_v4	1.269	30	0.1636	0.09	0.4079	Anopheles darlingi	AcOrf-81 peptide
NC_001623.1_NP_054111.1	AF-A0A7R6WBR1-F1-model_v4	0.9993	30	0.1334	0.09	0.4471	Methyloprofundus sp.	AcOrf-81 peptide
NC_001623.1_NP_054111.1	AF-F0V314-F1-model_v4	2.925	30	0.181	0.09	0.4543	Mycoplasma suis KI3806	AcOrf-81 peptide
NC_001623.1_NP_054111.1	AF-A0A2M7GTN9-F1-model_v4	1.611	30	0.166	0.09	0.4303	Rhodospirillales bacterium CG15_BIG_FIL_POST_REV_8_21_14_020_66_15	AcOrf-81 peptide
NC_001623.1_NP_054111.1	AF-A0A845S9C2-F1-model_v4	6.743	30	0.2403	0.09	0.4686	Candidatus Parcubacteria bacterium	AcOrf-81 peptide
NC_001623.1_NP_054111.1	AF-A0A2D4GIB8-F1-model_v4	0.8355	30	0.1462	0.09	0.3908	Micrurus corallinus	AcOrf-81 peptide
NC_001623.1_NP_054111.1	AF-A0A0P1B088-F1-model_v4	2.045	30	0.1643	0.09	0.4664	Plasmopara halstedii	AcOrf-81 peptide
NC_001623.1_NP_054111.1	AF-A0A812F1W1-F1-model_v4	5.004	30	0.2237	0.09	0.4405	Candidatus Nitrosotenuis uzonensis	AcOrf-81 peptide
NC_001623.1_NP_054111.1	AF-A0A6J5E8L3-F1-model_v4	2.596	30	0.1831	0.09	0.4498	Burkholderia puraquae	AcOrf-81 peptide
NC_001623.1_NP_054111.1	AF-A0A1M2Z3N1-F1-model_v4	4.714	30	0.2141	0.09	0.4707	Rhizobiales bacterium 65-79	AcOrf-81 peptide
NC_001623.1_NP_054111.1	AF-A0A5K1USP6-F1-model_v4	0.9414	30	0.1385	0.09	0.4272	Entamoeba histolytica	AcOrf-81 peptide
NC_001623.1_NP_054111.1	AF-A0A383VQA2-F1-model_v4	3.941	30	0.202	0.09	0.465	Tetradesmus obliquus	AcOrf-81 peptide
NC_001623.1_NP_054111.1	AF-F0QQN0-F1-model_v4	1.347	30	0.1632	0.09	0.4156	Mycoplasma suis str. Illinois	AcOrf-81 peptide
NC_001623.1_NP_054111.1	AF-A0A832BJ51-F1-model_v4	9.087	30	0.2683	0.09	0.4804	Proteobacteria bacterium	AcOrf-81 peptide
NC_001623.1_NP_054111.1	AF-V8NBM5-F1-model_v4	4.714	30	0.2146	0.09	0.4604	Ophiophagus hannah	AcOrf-81 peptide
NC_001623.1_NP_054111.1	AF-A0A2W5X8Z0-F1-model_v4	4.184	30	0.2065	0.09	0.4591	Candidatus Eremiobacteraeota bacterium	AcOrf-81 peptide
NC_001623.1_NP_054111.1	AF-A0A0F2PY48-F1-model_v4	3.296	30	0.1771	0.09	0.4889	Peptococcaceae bacterium BRH_c4b	AcOrf-81 peptide
NC_001623.1_NP_054111.1	AF-A0A6L7TGN5-F1-model_v4	9.646	30	0.2553	0.09	0.5057	Gammaproteobacteria bacterium	AcOrf-81 peptide
NC_001623.1_NP_054111.1	AF-A0A4S4D202-F1-model_v4	1.815	30	0.1711	0.09	0.4187	Camellia sinensis var. sinensis	AcOrf-81 peptide
NC_001623.1_NP_054111.1	AF-A0A6I1QC47-F1-model_v4	0.7871	30	0.1286	0.09	0.4342	Dehalococcoidia bacterium	AcOrf-81 peptide
NC_001623.1_NP_054111.1	AF-A0A1V6E010-F1-model_v4	5.638	30	0.2388	0.09	0.4297	Spirochaetes bacterium ADurb.Bin110	AcOrf-81 peptide
NC_001623.1_NP_054111.1	AF-A0A4R0N8Q4-F1-model_v4	4.441	30	0.2079	0.09	0.4556	Pedobacter hiemivivus	AcOrf-81 peptide
NC_001623.1_NP_054111.1	AF-A0A7T9H4A3-F1-model_v4	3.498	30	0.1856	0.09	0.4777	Candidatus Melainabacteria bacterium	AcOrf-81 peptide
NC_001623.1_NP_054111.1	AF-A0A2V8PPI2-F1-model_v4	4.714	30	0.2479	0.09	0.4115	Acidobacteria bacterium	AcOrf-81 peptide
NC_001623.1_NP_054111.1	AF-A0A3B8LH61-F1-model_v4	1.815	30	0.1625	0.09	0.4605	Myxococcales bacterium	AcOrf-81 peptide
NC_001623.1_NP_054111.1	AF-A0A0K8T7N9-F1-model_v4	1.926	30	0.1626	0.09	0.466	Lygus hesperus	AcOrf-81 peptide
NC_001623.1_NP_054111.1	AF-A0A2M8KZ48-F1-model_v4	5.312	30	0.2014	0.09	0.5281	Candidatus Saccharibacteria bacterium CG10_big_fil_rev_8_21_14_0_10_47_8	AcOrf-81 peptide
NC_001623.1_NP_054111.1	AF-A0A2H0A262-F1-model_v4	0.7871	30	0.1417	0.09	0.4023	Desulfobacterales bacterium CG23_combo_of_CG06-09_8_20_14_all_51_8	AcOrf-81 peptide
NC_001623.1_NP_054111.1	AF-A0A1S4FJP0-F1-model_v4	1.195	30	0.1643	0.09	0.3924	Aedes aegypti	AcOrf-81 peptide
NC_001623.1_NP_054111.1	AF-A0A653HFM8-F1-model_v4	8.065	30	0.2433	0.09	0.4916	Hepatocystis sp. ex Piliocolobus tephrosceles	AcOrf-81 peptide
NC_001623.1_NP_054111.1	AF-G3XN81-F1-model_v4	0.6581	30	0.1313	0.09	0.4281	Aspergillus niger ATCC 1015	AcOrf-81 peptide
NC_001623.1_NP_054111.1	AF-A0A210PKT4-F1-model_v4	3.296	30	0.2037	0.09	0.4378	Mizuhopecten yessoensis	AcOrf-81 peptide
NC_001623.1_NP_054111.1	AF-A0A813BTV8-F1-model_v4	1.926	30	0.1744	0.09	0.4227	Symbiodinium sp. KB8	AcOrf-81 peptide
NC_001623.1_NP_054111.1	AF-A0A1E4T5T9-F1-model_v4	2.304	30	0.171	0.09	0.471	[Candida] arabinofermentans NRRL YB-2248	AcOrf-81 peptide
NC_001623.1_NP_054111.1	AF-A0A855N8X7-F1-model_v4	3.105	30	0.1891	0.09	0.4647	Campylobacter hyointestinalis subsp. hyointestinalis	AcOrf-81 peptide
NC_001623.1_NP_054111.1	AF-A0A2D5S9U4-F1-model_v4	1.926	30	0.2951	0.09	0.2565	Planctomycetaceae bacterium	AcOrf-81 peptide
NC_001623.1_NP_054111.1	AF-A0A269TUV9-F1-model_v4	2.596	29	0.2008	0.082	0.3831	Streptomyces sp. alain-838	AcOrf-81 peptide
NC_001623.1_NP_054111.1	AF-A0A3B5B666-F1-model_v4	7.158	29	0.2207	0.082	0.4739	Stegastes partitus	AcOrf-81 peptide
NC_001623.1_NP_054111.1	AF-L8WMU9-F1-model_v4	3.713	29	0.1985	0.082	0.4424	Rhizoctonia solani AG-1 IA	AcOrf-81 peptide
NC_001623.1_NP_054111.1	AF-A0A455T1B2-F1-model_v4	2.925	29	0.1816	0.082	0.4486	Thermogemmatispora argillosa	AcOrf-81 peptide
NC_001623.1_NP_054111.1	AF-A0A7C8YQS6-F1-model_v4	9.087	29	0.2564	0.082	0.4694	Opuntia streptacantha	AcOrf-81 peptide
NC_001623.1_NP_054111.1	AF-A0A8B2NRM0-F1-model_v4	1.611	29	0.1582	0.082	0.4222	Acuticoccus sediminis	AcOrf-81 peptide
NC_001623.1_NP_054111.1	AF-A0A834XVK7-F1-model_v4	3.713	29	0.2246	0.082	0.3882	Aphidius gifuensis	AcOrf-81 peptide
NC_001623.1_NP_054111.1	AF-A6DES5-F1-model_v4	9.646	29	0.2399	0.082	0.489	Caminibacter mediatlanticus TB-2	AcOrf-81 peptide
NC_001623.1_NP_054111.1	AF-A0A1V5QRU1-F1-model_v4	2.17	29	0.1662	0.082	0.4195	Betaproteobacteria bacterium ADurb.Bin341	AcOrf-81 peptide
NC_001623.1_NP_054111.1	AF-A0A2L2Y657-F1-model_v4	2.445	29	0.1722	0.082	0.4212	Parasteatoda tepidariorum	AcOrf-81 peptide
NC_001623.1_NP_054111.1	AF-A0A7S2CS70-F1-model_v4	3.713	29	0.2037	0.082	0.4326	Alexandrium andersonii	AcOrf-81 peptide
NC_001623.1_NP_054111.1	AF-A0A506P4E1-F1-model_v4	5.004	29	0.2082	0.082	0.4463	Pantoea anthophila	AcOrf-81 peptide
NC_001623.1_NP_054111.1	AF-A0A1I4B2N3-F1-model_v4	2.596	29	0.1728	0.082	0.4495	Shimia haliotis	AcOrf-81 peptide
NC_001623.1_NP_054111.1	AF-A0A7S4I2T0-F1-model_v4	8.561	29	0.2301	0.082	0.5017	Prymnesium polylepis	AcOrf-81 peptide
NC_001623.1_NP_054111.1	AF-A0A6C1QT79-F1-model_v4	1.815	29	0.1662	0.082	0.4159	Spirochaetaceae bacterium	AcOrf-81 peptide
NC_001623.1_NP_054111.1	AF-A0A7Y3KNF2-F1-model_v4	3.941	29	0.1787	0.082	0.4799	Candidatus Eremiobacteraeota bacterium	AcOrf-81 peptide
NC_001623.1_NP_054111.1	AF-A0A7X7ZC74-F1-model_v4	2.304	29	0.1645	0.082	0.4551	Ignavibacteriales bacterium	AcOrf-81 peptide
NC_001623.1_NP_054111.1	AF-A0A550JKK7-F1-model_v4	0.9414	29	0.142	0.082	0.3886	Desulfuromonas acetexigens	AcOrf-81 peptide
NC_001623.1_NP_054111.1	AF-A0A6P7E6E0-F1-model_v4	8.561	29	0.251	0.082	0.4507	Ovis aries	AcOrf-81 peptide
NC_001623.1_NP_054111.1	AF-A0A4P9Y944-F1-model_v4	4.714	29	0.2097	0.082	0.452	Piptocephalis cylindrospora	AcOrf-81 peptide
NC_001623.1_NP_054111.1	AF-A0A7I8WVX4-F1-model_v4	8.561	29	0.2389	0.082	0.4976	Bursaphelenchus xylophilus	AcOrf-81 peptide
NC_001623.1_NP_054111.1	AF-A0A6S7FEH3-F1-model_v4	3.713	29	0.1912	0.082	0.4499	Paramuricea clavata	AcOrf-81 peptide
NC_001623.1_NP_054111.1	AF-A0A3N5VWJ8-F1-model_v4	0.8355	29	0.1629	0.082	0.3421	Planctomycetaceae bacterium	AcOrf-81 peptide
NC_001623.1_NP_054111.1	AF-A0A6N4WW45-F1-model_v4	5.985	29	0.218	0.082	0.4628	Lentimonas sp. CC11	AcOrf-81 peptide
NC_001623.1_NP_054111.1	AF-A0A7R9AKB2-F1-model_v4	1.347	29	0.1578	0.082	0.3998	Timema shepardi	AcOrf-81 peptide
NC_001623.1_NP_054111.1	AF-Q297U2-F1-model_v4	1.269	29	0.1544	0.082	0.4104	Drosophila pseudoobscura pseudoobscura	AcOrf-81 peptide
NC_001623.1_NP_054111.1	AF-B0WEK3-F1-model_v4	8.065	29	0.2388	0.082	0.4626	Culex quinquefasciatus	AcOrf-81 peptide
NC_001623.1_NP_054111.1	AF-A0A6J4J257-F1-model_v4	5.985	29	0.2148	0.082	0.4605	uncultured Chloroflexi bacterium	AcOrf-81 peptide
NC_001623.1_NP_054111.1	AF-A0A6J2JWY7-F1-model_v4	2.445	29	0.1617	0.082	0.4565	Bombyx mandarina	AcOrf-81 peptide
NC_001623.1_NP_054111.1	AF-B6AK07-F1-model_v4	1.517	29	0.175	0.082	0.3745	Cryptosporidium muris RN66	AcOrf-81 peptide
NC_001623.1_NP_054111.1	AF-A0A356AAU9-F1-model_v4	2.925	29	0.1946	0.082	0.4179	Planctomycetaceae bacterium	AcOrf-81 peptide
NC_001623.1_NP_054111.1	AF-A0A3M7NQL4-F1-model_v4	1.71	29	0.1636	0.082	0.4154	Chaetothyriales sp. CBS 134916	AcOrf-81 peptide
NC_001623.1_NP_054111.1	AF-A0A7K3WKF6-F1-model_v4	5.985	29	0.2187	0.082	0.4454	Cryomorpha ignava	AcOrf-81 peptide
NC_001623.1_NP_054111.1	AF-A0A258VTC5-F1-model_v4	9.646	28	0.4143	0.076	0.2693	Bdellovibrio sp. 28-41-41	AcOrf-81 peptide
NC_001623.1_NP_054111.1	AF-A0A1M6ST56-F1-model_v4	6.743	28	0.2641	0.076	0.3725	Fibrobacter sp. UWB12	AcOrf-81 peptide
NC_001623.1_NP_054111.1	AF-A0A0D0F5D0-F1-model_v4	8.065	28	0.2535	0.076	0.4033	Pedobacter lusitanus	AcOrf-81 peptide
NC_001623.1_NP_054111.1	AF-A0A160FA32-F1-model_v4	3.713	28	0.1919	0.076	0.4033	Anoxybacillus sp. B7M1	AcOrf-81 peptide
NC_001623.1_NP_054111.1	AF-A0A839RBN4-F1-model_v4	9.646	28	0.2618	0.076	0.4437	Paenibacillus illinoisensis	AcOrf-81 peptide
NC_001623.1_NP_054111.1	AF-A0A0F2RGG7-F1-model_v4	7.598	28	0.2327	0.076	0.446	Rhodospirillaceae bacterium BRH_c57	AcOrf-81 peptide
NC_001623.1_NP_054111.1	AF-A0A544ZJ30-F1-model_v4	8.561	28	0.2224	0.076	0.4717	Microbispora sp. KK1-11	AcOrf-81 peptide
NC_001623.1_NP_054111.1	AF-A0A484DWA1-F1-model_v4	3.105	28	0.1709	0.076	0.4539	Bremia lactucae	AcOrf-81 peptide
NC_001623.1_NP_054111.1	AF-A0A2E8YXU6-F1-model_v4	5.638	28	0.2195	0.076	0.4257	Nocardioides sp.	AcOrf-81 peptide
NC_001623.1_NP_054111.1	AF-A0A816X097-F1-model_v4	4.714	28	0.2056	0.076	0.4065	Brassica napus	AcOrf-81 peptide
NC_001623.1_NP_054111.1	AF-A0A1M6BKR3-F1-model_v4	9.087	28	0.2169	0.076	0.5023	Anaerovibrio lipolyticus DSM 3074	AcOrf-81 peptide
NC_001623.1_NP_054111.1	AF-A0A6H5HGJ4-F1-model_v4	5.312	28	0.2119	0.076	0.4175	Nesidiocoris tenuis	AcOrf-81 peptide
NC_001623.1_NP_054111.1	AF-F0F7Y5-F1-model_v4	3.498	28	0.1829	0.076	0.4371	Prevotella multiformis DSM 16608	AcOrf-81 peptide
NC_001623.1_NP_054111.1	AF-A0A2A2R558-F1-model_v4	4.714	28	0.1988	0.076	0.44	Verrucomicrobia bacterium Tous-C9LFEB	AcOrf-81 peptide
NC_001623.1_NP_054111.1	AF-A0A352JW77-F1-model_v4	5.638	28	0.2217	0.076	0.4192	candidate division Zixibacteria bacterium	AcOrf-81 peptide
NC_001623.1_NP_054111.1	AF-A0A6N9PFK7-F1-model_v4	4.714	28	0.1786	0.076	0.4794	Clostridiaceae bacterium	AcOrf-81 peptide
NC_001623.1_NP_054111.1	AF-A0A835ZAT2-F1-model_v4	0.4884	28	0.1224	0.076	0.3708	Tribonema minus	AcOrf-81 peptide
NC_001623.1_NP_054111.1	AF-A0A850BLK9-F1-model_v4	5.004	28	0.1853	0.076	0.4758	Polyangiaceae bacterium	AcOrf-81 peptide
NC_001623.1_NP_054111.1	AF-A0A0D8XQ16-F1-model_v4	4.441	28	0.1995	0.076	0.4202	Dictyocaulus viviparus	AcOrf-81 peptide
NC_001623.1_NP_054111.1	AF-A0A7V0UEH8-F1-model_v4	1.71	28	0.1756	0.076	0.3516	Acidobacteria bacterium	AcOrf-81 peptide
NC_001623.1_NP_054111.1	AF-A0A3M1TEA2-F1-model_v4	5.985	28	0.2126	0.076	0.4556	Deltaproteobacteria bacterium	AcOrf-81 peptide
NC_001623.1_NP_054111.1	AF-A0A1V4VJD7-F1-model_v4	5.004	28	0.1876	0.076	0.4557	Pelotomaculum sp. PtaB.Bin104	AcOrf-81 peptide
NC_001623.1_NP_054111.1	AF-A0A2E2JDB2-F1-model_v4	3.498	28	0.182	0.076	0.4317	Polycyclovorans sp.	AcOrf-81 peptide
NC_001623.1_NP_054111.1	AF-A0A2S8K9A1-F1-model_v4	9.646	28	0.2485	0.076	0.4527	Desulfobacteraceae bacterium SEEP-SAG9	AcOrf-81 peptide
NC_001623.1_NP_054111.1	AF-A0A7C3X8V1-F1-model_v4	6.353	28	0.2236	0.076	0.4165	Phycisphaerales bacterium	AcOrf-81 peptide
NC_001623.1_NP_054111.1	AF-A0A521KCG4-F1-model_v4	1.926	28	0.1437	0.076	0.4465	Planctomycetota bacterium	AcOrf-81 peptide
NC_001623.1_NP_054111.1	AF-I7LW82-F1-model_v4	7.158	28	0.2598	0.076	0.3808	Tetrahymena thermophila SB210	AcOrf-81 peptide
NC_001623.1_NP_054111.1	AF-A0A668T6E3-F1-model_v4	1.195	28	0.154	0.076	0.3702	Oreochromis aureus	AcOrf-81 peptide
NC_001623.1_NP_054111.1	AF-A0A2E5PGR7-F1-model_v4	5.004	28	0.1781	0.076	0.4777	Rhodospirillaceae bacterium	AcOrf-81 peptide
NC_001623.1_NP_054111.1	AF-K7V855-F1-model_v4	3.105	28	0.1685	0.076	0.4316	Zea mays	AcOrf-81 peptide
NC_001623.1_NP_054111.1	AF-F0WR85-F1-model_v4	2.445	28	0.1681	0.076	0.408	Albugo laibachii Nc14	AcOrf-81 peptide
NC_001623.1_NP_054111.1	AF-A0A0V0QCL2-F1-model_v4	7.158	28	0.2235	0.076	0.4381	Pseudocohnilembus persalinus	AcOrf-81 peptide
NC_001623.1_NP_054111.1	AF-A0A846RR60-F1-model_v4	2.925	28	0.1636	0.076	0.4376	Brevibacterium marinum	AcOrf-81 peptide
NC_001623.1_NP_054111.1	AF-A0A0F6QA55-F1-model_v4	5.004	28	0.2003	0.076	0.4266	Glypta fumiferanae	AcOrf-81 peptide
NC_001623.1_NP_054111.1	AF-E2A2I6-F1-model_v4	0.6986	28	0.1237	0.076	0.3881	Camponotus floridanus	AcOrf-81 peptide
NC_001623.1_NP_054111.1	AF-A0A178U5L7-F1-model_v4	5.312	28	0.2095	0.076	0.4185	Arabidopsis thaliana	AcOrf-81 peptide
NC_001623.1_NP_054111.1	AF-A0A7S3NYB0-F1-model_v4	8.065	27	0.2191	0.069	0.4393	Moneuplotes crassus	AcOrf-81 peptide
NC_001623.1_NP_054111.1	AF-E6YQ87-F1-model_v4	3.713	27	0.1765	0.069	0.4275	Bartonella sp. AR 15-3	AcOrf-81 peptide
NC_001623.1_NP_054111.1	AF-A0A6G6WX34-F1-model_v4	4.184	27	0.17	0.069	0.4674	Nordella sp. HKS 07	AcOrf-81 peptide
NC_001623.1_NP_054111.1	AF-A0A7Y3RNP0-F1-model_v4	5.985	27	0.1908	0.069	0.467	Parvularcula mediterranea	AcOrf-81 peptide
NC_001623.1_NP_054111.1	AF-A0A2G3D2Y3-F1-model_v4	1.926	27	0.1607	0.069	0.3642	Capsicum chinense	AcOrf-81 peptide
NC_001623.1_NP_054111.1	AF-A0A1G5MV42-F1-model_v4	3.105	27	0.1617	0.069	0.4366	Afifella marina DSM 2698	AcOrf-81 peptide
NC_001623.1_NP_054111.1	AF-A0A0G1NAV6-F1-model_v4	3.105	27	0.2026	0.069	0.3487	Candidatus Azambacteria bacterium GW2011_GWA2_45_90	AcOrf-81 peptide
NC_001623.1_NP_054111.1	AF-A0A6N7BD10-F1-model_v4	8.561	27	0.2527	0.069	0.3921	Ignavibacteria bacterium	AcOrf-81 peptide
NC_001623.1_NP_054111.1	AF-F2LSB8-F1-model_v4	4.441	27	0.1802	0.069	0.431	Burkholderia gladioli BSR3	AcOrf-81 peptide
NC_001623.1_NP_054111.1	AF-A0A6G6JY28-F1-model_v4	6.743	27	0.2092	0.069	0.4291	Roseimicrobium sp. ORNL1	AcOrf-81 peptide
NC_001623.1_NP_054111.1	AF-A0A1B7TEJ5-F1-model_v4	7.598	27	0.2112	0.069	0.4402	Hanseniaspora valbyensis NRRL Y-1626	AcOrf-81 peptide
NC_001623.1_NP_054111.1	AF-A0A7W0SCB4-F1-model_v4	3.713	27	0.1884	0.069	0.4022	Blastocatellia bacterium	AcOrf-81 peptide
NC_001623.1_NP_054111.1	AF-A0A3D3KNV8-F1-model_v4	2.925	27	0.1631	0.069	0.4282	Planctomycetia bacterium	AcOrf-81 peptide
NC_001623.1_NP_054111.1	AF-A0A0B2UXF4-F1-model_v4	3.296	27	0.1629	0.069	0.4427	Toxocara canis	AcOrf-81 peptide
NC_001623.1_NP_054111.1	AF-A0A6G0ZSE4-F1-model_v4	9.087	27	0.2298	0.069	0.4565	Andreprevotia sp. IGB-42	AcOrf-81 peptide
NC_001623.1_NP_054111.1	AF-A0A6H9KY90-F1-model_v4	6.743	27	0.223	0.069	0.3953	Calditrichaeota bacterium	AcOrf-81 peptide
NC_001623.1_NP_054111.1	AF-A0A7T2GLR2-F1-model_v4	2.045	27	0.1676	0.069	0.3689	Sphingosinicella flava	AcOrf-81 peptide
NC_001623.1_NP_054111.1	AF-A0A7X1B1B6-F1-model_v4	6.353	27	0.1953	0.069	0.4505	Puniceicoccus vermicola	AcOrf-81 peptide
NC_001623.1_NP_054111.1	AF-A0A4Y7NPJ8-F1-model_v4	3.498	27	0.1676	0.069	0.4439	Simocephalus serrulatus	AcOrf-81 peptide
NC_001623.1_NP_054111.1	AF-A5KSZ4-F1-model_v4	0.62	27	0.1288	0.069	0.342	candidate division TM7 genomosp. GTL1	AcOrf-81 peptide
NC_001623.1_NP_054111.1	AF-A0A7V2GYW2-F1-model_v4	2.304	27	0.1433	0.069	0.4323	Betaproteobacteria bacterium	AcOrf-81 peptide
NC_001623.1_NP_054111.1	AF-A0A200R0C8-F1-model_v4	1.611	27	0.1459	0.069	0.3895	Macleaya cordata	AcOrf-81 peptide
NC_001623.1_NP_054111.1	AF-A0A1M3QP78-F1-model_v4	3.296	27	0.193	0.069	0.3717	Sphingobacteriales bacterium 40-81	AcOrf-81 peptide
NC_001623.1_NP_054111.1	AF-A0A257B617-F1-model_v4	9.087	27	0.2157	0.069	0.475	Chloracidobacterium sp. CP2_5A	AcOrf-81 peptide
NC_001623.1_NP_054111.1	AF-A0A2E6W3X3-F1-model_v4	5.312	27	0.1787	0.069	0.458	Magnetovibrio sp.	AcOrf-81 peptide
NC_001623.1_NP_054111.1	AF-J9I5D9-F1-model_v4	2.045	27	0.1443	0.069	0.4358	Oxytricha trifallax	AcOrf-81 peptide
NC_001623.1_NP_054111.1	AF-A0A4D7BCL9-F1-model_v4	1.926	27	0.1498	0.069	0.407	Phreatobacter stygius	AcOrf-81 peptide
NC_001623.1_NP_054111.1	AF-A0A7L9BSC3-F1-model_v4	7.158	27	0.2153	0.069	0.4435	Phycisphaeraceae bacterium	AcOrf-81 peptide
NC_001623.1_NP_054111.1	AF-A0A0G4FV64-F1-model_v4	2.304	27	0.154	0.069	0.4091	Vitrella brassicaformis CCMP3155	AcOrf-81 peptide
NC_001623.1_NP_054111.1	AF-A0A820GJW0-F1-model_v4	1.517	27	0.1504	0.069	0.3814	Rotaria socialis	AcOrf-81 peptide
NC_001623.1_NP_054111.1	AF-A0A2U1J5I8-F1-model_v4	5.985	27	0.2008	0.069	0.4441	Smittium angustum	AcOrf-81 peptide
NC_001623.1_NP_054111.1	AF-A0A0D5IU88-F1-model_v4	7.598	27	0.2026	0.069	0.4561	Burkholderia dolosa AU0158	AcOrf-81 peptide
NC_001623.1_NP_054111.1	AF-A0A1F6EN80-F1-model_v4	8.065	26	0.1946	0.063	0.4568	Candidatus Kaiserbacteria bacterium RIFCSPLOWO2_01_FULL_50_24	AcOrf-81 peptide
NC_001623.1_NP_054111.1	AF-A0A2I1F3F5-F1-model_v4	3.296	26	0.1712	0.063	0.4002	Rhizophagus irregularis	AcOrf-81 peptide
NC_001623.1_NP_054111.1	AF-A0A7I4Z551-F1-model_v4	6.353	26	0.2121	0.063	0.3899	Haemonchus contortus	AcOrf-81 peptide
NC_001623.1_NP_054111.1	AF-B8CSS3-F1-model_v4	9.646	26	0.2251	0.063	0.4456	Shewanella piezotolerans WP3	AcOrf-81 peptide
NC_001623.1_NP_054111.1	AF-A0A2E4HE58-F1-model_v4	6.743	26	0.2152	0.063	0.3873	Cytophagaceae bacterium	AcOrf-81 peptide
NC_001623.1_NP_054111.1	AF-A0A356J3R8-F1-model_v4	5.312	26	0.2306	0.063	0.3442	Verrucomicrobia bacterium	AcOrf-81 peptide
NC_001623.1_NP_054111.1	AF-A0A0S7YNU3-F1-model_v4	2.925	26	0.1848	0.063	0.3525	Deltaproteobacteria bacterium SG8_13	AcOrf-81 peptide
NC_001623.1_NP_054111.1	AF-A0A1I7CRM6-F1-model_v4	5.004	26	0.1833	0.063	0.4301	Algoriphagus locisalis	AcOrf-81 peptide
NC_001623.1_NP_054111.1	AF-A0A0L0SMU5-F1-model_v4	4.714	26	0.1572	0.063	0.4615	Allomyces macrogynus ATCC 38327	AcOrf-81 peptide
NC_001623.1_NP_054111.1	AF-A0A377Q8V1-F1-model_v4	1.71	26	0.138	0.063	0.385	Iodobacter fluviatilis	AcOrf-81 peptide
NC_001623.1_NP_054111.1	AF-A0A7V0VFU3-F1-model_v4	2.755	26	0.1425	0.063	0.4388	Ignavibacteria bacterium	AcOrf-81 peptide
NC_001623.1_NP_054111.1	AF-A0A538U492-F1-model_v4	2.17	26	0.1573	0.063	0.3809	Candidatus Eisenbacteria bacterium	AcOrf-81 peptide
NC_001623.1_NP_054111.1	AF-A0A538SGJ0-F1-model_v4	5.985	26	0.1948	0.063	0.4281	Candidatus Eisenbacteria bacterium	AcOrf-81 peptide
NC_001623.1_NP_054111.1	AF-A0A831X817-F1-model_v4	5.638	26	0.1681	0.063	0.4671	Armatimonadetes bacterium	AcOrf-81 peptide
NC_001623.1_NP_054111.1	AF-A0A2E9RUL4-F1-model_v4	5.638	26	0.1903	0.063	0.4205	Opitutae bacterium	AcOrf-81 peptide
NC_001623.1_NP_054111.1	AF-A0A2E8GEC4-F1-model_v4	5.312	26	0.1879	0.063	0.4158	Nitrospiraceae bacterium	AcOrf-81 peptide
NC_001623.1_NP_054111.1	AF-A0A077Z7V2-F1-model_v4	5.004	26	0.194	0.063	0.4066	Trichuris trichiura	AcOrf-81 peptide
NC_001623.1_NP_054111.1	AF-A0A3Q2TRT2-F1-model_v4	5.638	26	0.1946	0.063	0.4025	Gallus gallus	AcOrf-81 peptide
NC_001623.1_NP_054111.1	AF-A0A6L6EDY6-F1-model_v4	2.17	26	0.1415	0.063	0.4094	Actinomycetia bacterium	AcOrf-81 peptide
NC_001623.1_NP_054111.1	AF-A0A4P5TF28-F1-model_v4	3.296	26	0.1824	0.063	0.3712	Bacteroidetes bacterium	AcOrf-81 peptide
NC_001623.1_NP_054111.1	AF-G7E736-F1-model_v4	6.353	26	0.2155	0.063	0.3844	Mixia osmundae IAM 14324	AcOrf-81 peptide
NC_001623.1_NP_054111.1	AF-A0A2E0VNJ2-F1-model_v4	5.004	26	0.1853	0.063	0.4141	Saprospirales bacterium	AcOrf-81 peptide
NC_001623.1_NP_054111.1	AF-A0A1F3BII9-F1-model_v4	5.638	26	0.1946	0.063	0.4146	Armatimonadetes bacterium RBG_16_58_9	AcOrf-81 peptide
NC_001623.1_NP_054111.1	AF-M7CGW4-F1-model_v4	1.269	26	0.1466	0.063	0.3488	Chelonia mydas	AcOrf-81 peptide
NC_001623.1_NP_054111.1	AF-A0A0N4VJV1-F1-model_v4	6.353	26	0.1852	0.063	0.4449	Enterobius vermicularis	AcOrf-81 peptide
NC_001623.1_NP_054111.1	AF-H9JRA8-F1-model_v4	8.065	26	0.2068	0.063	0.4279	Bombyx mori	AcOrf-81 peptide
NC_001623.1_NP_054111.1	AF-A0A6G0X779-F1-model_v4	5.638	26	0.1881	0.063	0.4245	Aphanomyces euteiches	AcOrf-81 peptide
NC_001623.1_NP_054111.1	AF-A0A2V6S831-F1-model_v4	2.304	26	0.1282	0.063	0.4451	Candidatus Rokubacteria bacterium	AcOrf-81 peptide
NC_001623.1_NP_054111.1	AF-A0A1C3EHG1-F1-model_v4	3.296	26	0.1661	0.063	0.3842	Planctopirus hydrillae	AcOrf-81 peptide
NC_001623.1_NP_054111.1	AF-A0A2M6X7X9-F1-model_v4	8.065	25	0.194	0.057	0.4453	Bdellovibrionales bacterium CG10_big_fil_rev_8_21_14_0_10_45_34	AcOrf-81 peptide
NC_001623.1_NP_054111.1	AF-A0A3N5IJ19-F1-model_v4	5.312	25	0.1722	0.057	0.4074	Desulfobacteraceae bacterium	AcOrf-81 peptide
NC_001623.1_NP_054111.1	AF-Q1Z2Z3-F1-model_v4	3.941	25	0.1843	0.057	0.3611	Photobacterium profundum 3TCK	AcOrf-81 peptide
NC_001623.1_NP_054111.1	AF-M8BM40-F1-model_v4	5.312	25	0.1692	0.057	0.4191	Aegilops tauschii	AcOrf-81 peptide
NC_001623.1_NP_054111.1	AF-A0A0G4F6I7-F1-model_v4	5.312	25	0.205	0.057	0.351	Chromera velia CCMP2878	AcOrf-81 peptide
NC_001623.1_NP_054111.1	AF-A0A6I4UTL5-F1-model_v4	2.304	25	0.1424	0.057	0.3801	Croceibacterium soli	AcOrf-81 peptide
NC_001623.1_NP_054111.1	AF-A0A5C1HRS3-F1-model_v4	2.17	25	0.157	0.057	0.3315	Mucilaginibacter rubeus	AcOrf-81 peptide
NC_001623.1_NP_054111.1	AF-A0A662UH97-F1-model_v4	4.184	25	0.1587	0.057	0.4096	Thermoprotei archaeon	AcOrf-81 peptide
NC_001623.1_NP_054111.1	AF-A0A7H8R672-F1-model_v4	6.353	25	0.1812	0.057	0.4355	Talaromyces rugulosus	AcOrf-81 peptide
NC_001623.1_NP_054111.1	AF-A0A845JT41-F1-model_v4	5.004	25	0.1851	0.057	0.3836	Nitrospinae bacterium	AcOrf-81 peptide
NC_001623.1_NP_054111.1	AF-A0A357ZJT2-F1-model_v4	2.755	25	0.1584	0.057	0.3614	Desulfobulbaceae bacterium	AcOrf-81 peptide
NC_001623.1_NP_054111.1	AF-A0A3D2XDI9-F1-model_v4	2.045	25	0.1434	0.057	0.3802	Chitinophagaceae bacterium	AcOrf-81 peptide
NC_001623.1_NP_054111.1	AF-A0A7J6NNP3-F1-model_v4	2.755	25	0.1678	0.057	0.3453	Perkinsus olseni	AcOrf-81 peptide
NC_001623.1_NP_054111.1	AF-A0A447G1N3-F1-model_v4	8.561	25	0.1943	0.057	0.4301	Nitrosopumilaceae archaeon	AcOrf-81 peptide
NC_001623.1_NP_054111.1	AF-A0A2E4FCW0-F1-model_v4	7.598	25	0.3247	0.057	0.2622	Deltaproteobacteria bacterium	AcOrf-81 peptide
NC_001623.1_NP_054111.1	AF-F3L303-F1-model_v4	5.312	25	0.1756	0.057	0.4205	Aequoribacter fuscus	AcOrf-81 peptide
NC_001623.1_NP_054111.1	AF-A0A0K8VBF4-F1-model_v4	5.312	25	0.1578	0.057	0.439	Bactrocera latifrons	AcOrf-81 peptide
NC_001623.1_NP_054111.1	AF-A0A2N5JUC7-F1-model_v4	8.065	25	0.1789	0.057	0.4867	Actinomycetia bacterium	AcOrf-81 peptide
NC_001623.1_NP_054111.1	AF-C5FWM0-F1-model_v4	9.646	25	0.1966	0.057	0.4572	Microsporum canis CBS 113480	AcOrf-81 peptide
NC_001623.1_NP_054111.1	AF-A0A7X2DC74-F1-model_v4	3.105	25	0.1536	0.057	0.3912	Clostridia bacterium	AcOrf-81 peptide
NC_001623.1_NP_054111.1	AF-A0A1I7XWB5-F1-model_v4	4.184	25	0.1546	0.057	0.4326	Steinernema glaseri	AcOrf-81 peptide
NC_001623.1_NP_054111.1	AF-A0A0D8Y8P2-F1-model_v4	5.004	25	0.1706	0.057	0.4073	Dictyocaulus viviparus	AcOrf-81 peptide
NC_001623.1_NP_054111.1	AF-A0A2P6MP70-F1-model_v4	6.743	25	0.1833	0.057	0.4256	Planoprotostelium fungivorum	AcOrf-81 peptide
NC_001623.1_NP_054111.1	AF-W3A5T6-F1-model_v4	2.304	25	0.1404	0.057	0.3933	Phytophthora parasitica P10297	AcOrf-81 peptide
NC_001623.1_NP_054111.1	AF-A0A2H6BEN6-F1-model_v4	8.065	24	0.1921	0.051	0.4092	Methylopila sp. Yamaguchi	AcOrf-81 peptide
NC_001623.1_NP_054111.1	AF-A0A3B9BXT5-F1-model_v4	5.004	24	0.1552	0.051	0.4117	Chitinophagaceae bacterium	AcOrf-81 peptide
NC_001623.1_NP_054111.1	AF-A0A2Z6RRE8-F1-model_v4	3.941	24	0.1404	0.051	0.4197	Rhizophagus clarus	AcOrf-81 peptide
NC_001623.1_NP_054111.1	AF-A0A1F9UT19-F1-model_v4	1.269	24	0.1204	0.051	0.3601	Elusimicrobia bacterium RBG_16_66_12	AcOrf-81 peptide
NC_001623.1_NP_054111.1	AF-D4E0Y5-F1-model_v4	9.087	24	0.1853	0.051	0.4269	Serratia odorifera DSM 4582	AcOrf-81 peptide
NC_001623.1_NP_054111.1	AF-A0A1G0PC68-F1-model_v4	2.304	24	0.1306	0.051	0.3836	Ignavibacteria bacterium GWB2_35_6b	AcOrf-81 peptide
NC_001623.1_NP_054111.1	AF-A0A0C3B2D2-F1-model_v4	5.004	24	0.1598	0.051	0.4163	Serendipita vermifera MAFF 305830	AcOrf-81 peptide
NC_001623.1_NP_054111.1	AF-A0A419G3R2-F1-model_v4	5.004	24	0.1482	0.051	0.4296	Peptococcaceae bacterium	AcOrf-81 peptide
NC_001623.1_NP_054111.1	AF-A0A5K7ZCG8-F1-model_v4	8.065	24	0.2021	0.051	0.3761	Desulfosarcina ovata subsp. sediminis	AcOrf-81 peptide
NC_001623.1_NP_054111.1	AF-A0A401RUM7-F1-model_v4	3.941	24	0.1543	0.051	0.4012	Chiloscyllium punctatum	AcOrf-81 peptide
NC_001623.1_NP_054111.1	AF-A0A7S0UNT0-F1-model_v4	6.743	24	0.1786	0.051	0.4076	Polytomella parva	AcOrf-81 peptide
NC_001623.1_NP_054111.1	AF-I0KBK5-F1-model_v4	4.441	24	0.1556	0.051	0.4045	Fibrella aestuarina BUZ 2	AcOrf-81 peptide
NC_001623.1_NP_054111.1	AF-A0A7W8QHC2-F1-model_v4	3.498	24	0.1521	0.051	0.3753	Nocardiopsis composta	AcOrf-81 peptide
NC_001623.1_NP_054111.1	AF-A0A4R4TC82-F1-model_v4	8.065	24	0.2199	0.051	0.362	Streptomyces hainanensis	AcOrf-81 peptide
NC_001623.1_NP_054111.1	AF-A0A7V8JGR6-F1-model_v4	8.561	24	0.2003	0.051	0.4121	Luteibacter sp.	AcOrf-81 peptide
NC_001623.1_NP_054111.1	AF-C3R9D0-F1-model_v4	5.985	24	0.1516	0.051	0.4507	Phocaeicola dorei 5_1_36/D4	AcOrf-81 peptide
NC_001623.1_NP_054111.1	AF-A0A397U0H1-F1-model_v4	3.296	24	0.1507	0.051	0.3799	Gigaspora rosea	AcOrf-81 peptide
NC_001623.1_NP_054111.1	AF-A0A1E5A2J4-F1-model_v4	9.087	24	0.1979	0.051	0.4196	Chromatiales bacterium (ex Bugula neritina AB1)	AcOrf-81 peptide
NC_001623.1_NP_054111.1	AF-A0A2D5NHZ6-F1-model_v4	5.985	24	0.1594	0.051	0.4375	Planctomycetota bacterium	AcOrf-81 peptide
NC_001623.1_NP_054111.1	AF-A0A2P5AMW1-F1-model_v4	9.087	24	0.1784	0.051	0.4589	Parasponia andersonii	AcOrf-81 peptide
NC_001623.1_NP_054111.1	AF-A0A7X6NL43-F1-model_v4	3.713	24	0.151	0.051	0.3894	Bacteroidales bacterium	AcOrf-81 peptide
NC_001623.1_NP_054111.1	AF-A0A7Y4XKJ4-F1-model_v4	5.312	24	0.1417	0.051	0.461	Hyphomicrobium sp.	AcOrf-81 peptide
NC_001623.1_NP_054111.1	AF-A0A818L179-F1-model_v4	2.925	24	0.1372	0.051	0.4059	Rotaria sp. Silwood1	AcOrf-81 peptide
NC_001623.1_NP_054111.1	AF-A0A800JJX1-F1-model_v4	9.646	24	0.2126	0.051	0.4067	Verrucomicrobiales bacterium	AcOrf-81 peptide
NC_001623.1_NP_054111.1	AF-A0A4R6EAK4-F1-model_v4	7.598	23	0.1734	0.045	0.395	Buttiauxella sp. JUb87	AcOrf-81 peptide
NC_001623.1_NP_054111.1	AF-A0A1F8E673-F1-model_v4	9.087	23	0.1802	0.045	0.4158	Candidatus Wolfebacteria bacterium RIFOXYD1_FULL_48_65	AcOrf-81 peptide
NC_001623.1_NP_054111.1	AF-A0A6N7ZUQ2-F1-model_v4	3.498	23	0.1247	0.045	0.4209	Roseibium sp. RKSG952	AcOrf-81 peptide
NC_001623.1_NP_054111.1	AF-A0A7C4XSI9-F1-model_v4	5.638	23	0.1555	0.045	0.4061	Hyphomicrobiales bacterium	AcOrf-81 peptide
NC_001623.1_NP_054111.1	AF-M5S946-F1-model_v4	9.087	23	0.1821	0.045	0.404	Rhodopirellula europaea SH398	AcOrf-81 peptide
NC_001623.1_NP_054111.1	AF-A0A2V8JSG8-F1-model_v4	5.004	23	0.1345	0.045	0.4472	Acidobacteria bacterium	AcOrf-81 peptide
NC_001623.1_NP_054111.1	AF-A0A014LEV5-F1-model_v4	4.184	23	0.1573	0.045	0.3566	Streptomyces sp. PRh5	AcOrf-81 peptide
NC_001623.1_NP_054111.1	AF-C0NG88-F1-model_v4	5.638	23	0.1759	0.045	0.3705	Histoplasma capsulatum G186AR	AcOrf-81 peptide
NC_001623.1_NP_054111.1	AF-A0A0F9LSQ8-F1-model_v4	7.158	23	0.1553	0.045	0.4462	marine sediment metagenome	AcOrf-81 peptide
NC_001623.1_NP_054111.1	AF-A0A831UL62-F1-model_v4	7.158	23	0.1552	0.045	0.4419	Candidatus Hydrogenedentes bacterium	AcOrf-81 peptide
NC_001623.1_NP_054111.1	AF-A0A239RR80-F1-model_v4	7.598	23	0.1749	0.045	0.3957	Prevotellaceae bacterium KH2P17	AcOrf-81 peptide
NC_001623.1_NP_054111.1	AF-A0A3D9H3X7-F1-model_v4	5.985	23	0.178	0.045	0.3551	Aestuariispira insulae	AcOrf-81 peptide
NC_001623.1_NP_054111.1	AF-A0A7V4P1T5-F1-model_v4	9.646	23	0.1615	0.045	0.4602	Phycisphaerae bacterium	AcOrf-81 peptide
NC_001623.1_NP_054111.1	AF-A0A2V9K578-F1-model_v4	4.441	23	0.1398	0.045	0.4127	Acidobacteria bacterium	AcOrf-81 peptide
NC_001623.1_NP_054111.1	AF-A0A426FRS3-F1-model_v4	6.353	23	0.1546	0.045	0.4353	Lautropia dentalis	AcOrf-81 peptide
NC_001623.1_NP_054111.1	AF-A0A6A4UCB8-F1-model_v4	4.441	23	0.1538	0.045	0.3609	Ignavibacteria bacterium	AcOrf-81 peptide
NC_001623.1_NP_054111.1	AF-A0A1G6BMM9-F1-model_v4	3.713	23	0.1412	0.045	0.396	Butyrivibrio sp. INlla16	AcOrf-81 peptide
NC_001623.1_NP_054111.1	AF-A0A7Y4VAE3-F1-model_v4	9.087	23	0.1868	0.045	0.4066	Candidatus Peribacteraceae bacterium	AcOrf-81 peptide
NC_001623.1_NP_054111.1	AF-A0A7V0U9G9-F1-model_v4	2.925	23	0.1531	0.045	0.3347	bacterium	AcOrf-81 peptide
NC_001623.1_NP_054111.1	AF-A0A849RUV7-F1-model_v4	6.353	23	0.1631	0.045	0.3933	Methylococcaceae bacterium	AcOrf-81 peptide
NC_001623.1_NP_054111.1	AF-D2UZP6-F1-model_v4	2.596	23	0.1574	0.045	0.3148	Naegleria gruberi	AcOrf-81 peptide
NC_001623.1_NP_054111.1	AF-A0A815YDV1-F1-model_v4	2.925	23	0.1242	0.045	0.3867	Didymodactylos carnosus	AcOrf-81 peptide
NC_001623.1_NP_054111.1	AF-A0A519MI94-F1-model_v4	7.158	23	0.1686	0.045	0.4181	Acidovorax sp.	AcOrf-81 peptide
NC_001623.1_NP_054111.1	AF-A0A6N2NEX9-F1-model_v4	9.087	23	0.1804	0.045	0.429	Salix viminalis	AcOrf-81 peptide
NC_001623.1_NP_054111.1	AF-A0A2E3GZU7-F1-model_v4	5.004	23	0.1368	0.045	0.4219	Pseudooceanicola sp.	AcOrf-81 peptide
NC_001623.1_NP_054111.1	AF-A0A1Q9E673-F1-model_v4	9.646	23	0.1822	0.045	0.4288	Symbiodinium microadriaticum	AcOrf-81 peptide
NC_001623.1_NP_054111.1	AF-K2CPD6-F1-model_v4	9.646	23	0.1691	0.045	0.4431	uncultured bacterium	AcOrf-81 peptide
NC_001623.1_NP_054111.1	AF-B9XDT6-F1-model_v4	4.441	23	0.131	0.045	0.4294	Pedosphaera parvula Ellin514	AcOrf-81 peptide
NC_001623.1_NP_054111.1	AF-A0A117S995-F1-model_v4	6.743	23	0.1771	0.045	0.3913	bacterium BRH_c32	AcOrf-81 peptide
NC_001623.1_NP_054111.1	AF-A0A167GBG5-F1-model_v4	7.158	23	0.1615	0.045	0.4118	Hydrogenophaga crassostreae	AcOrf-81 peptide
NC_001623.1_NP_054111.1	AF-A0A7X5VZZ1-F1-model_v4	5.638	23	0.1743	0.045	0.3567	Candidatus Aminicenantes bacterium	AcOrf-81 peptide
NC_001623.1_NP_054111.1	AF-A0A0D0AUV0-F1-model_v4	8.561	23	0.1845	0.045	0.4036	Suillus luteus UH-Slu-Lm8-n1	AcOrf-81 peptide
NC_001623.1_NP_054111.1	AF-A0A2T0RPT0-F1-model_v4	8.065	22	0.1555	0.04	0.4386	Aliiruegeria haliotis	AcOrf-81 peptide
NC_001623.1_NP_054111.1	AF-A0A814FWX4-F1-model_v4	8.065	22	0.1571	0.04	0.4213	Adineta steineri	AcOrf-81 peptide
NC_001623.1_NP_054111.1	AF-A0A3D6C798-F1-model_v4	6.353	22	0.1461	0.04	0.4134	Desulfobacteraceae bacterium	AcOrf-81 peptide
NC_001623.1_NP_054111.1	AF-A0A3N5VES1-F1-model_v4	7.598	22	0.1667	0.04	0.3864	Verrucomicrobiaceae bacterium	AcOrf-81 peptide
NC_001623.1_NP_054111.1	AF-A0A287PKY7-F1-model_v4	8.561	22	0.1477	0.04	0.4565	Hordeum vulgare subsp. vulgare	AcOrf-81 peptide
NC_001623.1_NP_054111.1	AF-A0A524KQI1-F1-model_v4	8.561	22	0.1632	0.04	0.4005	Hyphomicrobiales bacterium	AcOrf-81 peptide
NC_001623.1_NP_054111.1	AF-A0A316R858-F1-model_v4	8.561	22	0.1712	0.04	0.3739	Flavobacteriales bacterium	AcOrf-81 peptide
NC_001623.1_NP_054111.1	AF-A0A1X7RIL6-F1-model_v4	8.561	22	0.1644	0.04	0.4002	Zymoseptoria tritici ST99CH_3D7	AcOrf-81 peptide
NC_001623.1_NP_054111.1	AF-A0A539EJQ2-F1-model_v4	5.004	22	0.1437	0.04	0.3821	Elusimicrobia bacterium	AcOrf-81 peptide
NC_001623.1_NP_054111.1	AF-G7E6S0-F1-model_v4	2.445	22	0.1226	0.04	0.3658	Mixia osmundae IAM 14324	AcOrf-81 peptide
NC_001623.1_NP_054111.1	AF-A0A1F3BCZ3-F1-model_v4	3.941	22	0.1401	0.04	0.3672	Armatimonadetes bacterium RBG_16_58_9	AcOrf-81 peptide
NC_001623.1_NP_054111.1	AF-A0A7W0GT65-F1-model_v4	4.184	22	0.139	0.04	0.3801	Pyrinomonadaceae bacterium	AcOrf-81 peptide
NC_001623.1_NP_054111.1	AF-A0A6I7LW57-F1-model_v4	7.158	22	0.1571	0.04	0.4138	candidate division Zixibacteria bacterium	AcOrf-81 peptide
NC_001623.1_NP_054111.1	AF-D8TC65-F1-model_v4	3.498	22	0.1213	0.04	0.3929	Selaginella moellendorffii	AcOrf-81 peptide
NC_001623.1_NP_054111.1	AF-A0A7W1VUI5-F1-model_v4	7.158	22	0.1416	0.04	0.4585	Verrucomicrobia bacterium	AcOrf-81 peptide
NC_001623.1_NP_054111.1	AF-A0A315VBD8-F1-model_v4	7.598	22	0.1553	0.04	0.426	Gambusia affinis	AcOrf-81 peptide
NC_001623.1_NP_054111.1	AF-A0A6A6C4Z4-F1-model_v4	4.441	22	0.1311	0.04	0.3977	Zasmidium cellare ATCC 36951	AcOrf-81 peptide
NC_001623.1_NP_054111.1	AF-L0EJN6-F1-model_v4	9.087	21	0.1881	0.034	0.3476	Thermobacillus composti KWC4	AcOrf-81 peptide
NC_001623.1_NP_054111.1	AF-A0A7V3LEM7-F1-model_v4	4.184	21	0.1368	0.034	0.3332	Candidatus Berkelbacteria bacterium	AcOrf-81 peptide
NC_001623.1_NP_054111.1	AF-A0A3P7J9S6-F1-model_v4	9.646	21	0.1737	0.034	0.3742	Strongylus vulgaris	AcOrf-81 peptide
NC_001623.1_NP_054111.1	AF-A0A3C1KV70-F1-model_v4	9.646	21	0.1589	0.034	0.4184	Myxococcales bacterium	AcOrf-81 peptide
NC_001623.1_NP_054111.1	AF-A0A081BUG7-F1-model_v4	7.598	21	0.1594	0.034	0.3608	Candidatus Vecturithrix granuli	AcOrf-81 peptide
NC_001623.1_NP_054111.1	AF-A0A2P7NRZ3-F1-model_v4	7.158	21	0.1472	0.034	0.3901	Nitrosomonas supralitoralis	AcOrf-81 peptide
NC_001623.1_NP_054111.1	AF-A0A1Y2VP43-F1-model_v4	5.638	21	0.1464	0.034	0.3698	Hypoxylon sp. CI-4A	AcOrf-81 peptide
NC_001623.1_NP_054111.1	AF-A0A523A5J1-F1-model_v4	8.065	21	0.1588	0.034	0.3762	Desulfobulbaceae bacterium	AcOrf-81 peptide
NC_001623.1_NP_054111.1	AF-A0A838ZEB0-F1-model_v4	7.598	21	0.142	0.034	0.4018	Enterococcus hirae	AcOrf-81 peptide
NC_001623.1_NP_054111.1	AF-A0A7J6QZW4-F1-model_v4	2.925	21	0.1212	0.034	0.3362	Perkinsus olseni	AcOrf-81 peptide
NC_001623.1_NP_054111.1	AF-A0A4C1XG01-F1-model_v4	6.743	21	0.1335	0.034	0.402	Eumeta japonica	AcOrf-81 peptide
NC_001623.1_NP_054111.1	AF-A0A4U5N0Q8-F1-model_v4	9.087	21	0.158	0.034	0.4021	Steinernema carpocapsae	AcOrf-81 peptide
NC_001623.1_NP_054111.1	AF-A0A1H0T5V8-F1-model_v4	9.087	20	0.1587	0.029	0.3531	Desulforhopalus singaporensis	AcOrf-81 peptide
NC_001623.1_NP_054111.1	AF-A0A6G0ZEW3-F1-model_v4	7.158	20	0.1512	0.029	0.3514	Aphis craccivora	AcOrf-81 peptide
NC_001623.1_NP_054111.1	AF-A0A821GYM1-F1-model_v4	8.065	20	0.1461	0.029	0.3668	Rotaria sp. Silwood2	AcOrf-81 peptide
NC_001623.1_NP_054111.1	AF-A0A368GLG2-F1-model_v4	9.646	20	0.1542	0.029	0.3915	Ancylostoma caninum	AcOrf-81 peptide
NC_001623.1_NP_054111.1	AF-A0A0G1GBY2-F1-model_v4	5.638	20	0.1193	0.029	0.3859	Microgenomates group bacterium GW2011_GWF1_44_10	AcOrf-81 peptide
NC_001623.1_NP_054111.1	AF-A0A2G6E6Z5-F1-model_v4	6.743	20	0.1294	0.029	0.4109	candidate division KSB3 bacterium	AcOrf-81 peptide
NC_001623.1_NP_054111.1	AF-A0A6C0I3L4-F1-model_v4	6.743	20	0.1287	0.029	0.4043	viral metagenome	AcOrf-81 peptide
NC_001623.1_NP_054111.1	AF-A0A813GDW5-F1-model_v4	7.158	20	0.1339	0.029	0.3984	Polarella glacialis	AcOrf-81 peptide
NC_001623.1_NP_054111.1	AF-A0A4Y7JIT0-F1-model_v4	9.646	20	0.1385	0.029	0.4328	Papaver somniferum	AcOrf-81 peptide
NC_001623.1_NP_054111.1	AF-A0A1Y2AGH2-F1-model_v4	9.646	19	0.1463	0.024	0.3777	Naematelia encephala	AcOrf-81 peptide
NC_001623.1_NP_054111.1	AF-A0A2G8K8G2-F1-model_v4	8.561	19	0.1258	0.024	0.3984	Apostichopus japonicus	AcOrf-81 peptide
NC_001623.1_NP_054111.1	AF-A0A7S0V8C0-F1-model_v4	7.598	19	0.133	0.024	0.3605	Polytomella parva	AcOrf-81 peptide
NC_001623.1_NP_054111.1	AF-L1K282-F1-model_v4	7.598	19	0.1256	0.024	0.3949	Guillardia theta CCMP2712	AcOrf-81 peptide
NC_001623.1_NP_054111.1	AF-A0A537S8V0-F1-model_v4	4.441	19	0.1044	0.024	0.391	Alphaproteobacteria bacterium	AcOrf-81 peptide
NC_001623.1_NP_054111.1	AF-A0A820VU84-F1-model_v4	7.158	19	0.1379	0.024	0.3471	Rotaria socialis	AcOrf-81 peptide
NC_001623.1_NP_054111.1	AF-A0A7S0E4U8-F1-model_v4	6.353	18	0.1113	0.02	0.3534	Hanusia phi	AcOrf-81 peptide
NC_001623.1_NP_054111.1	AF-A0A3N5I814-F1-model_v4	3.296	18	0.1099	0.02	0.3037	Nitrospiraceae bacterium	AcOrf-81 peptide
NC_001623.1_NP_054111.1	AF-A0A1Y2SVD8-F1-model_v4	9.087	18	0.1259	0.02	0.3847	Alloscardovia macacae	AcOrf-81 peptide
NC_001623.1_NP_054111.1	AF-A0A3T0DTW4-F1-model_v4	5.985	18	0.1201	0.02	0.3238	Brevibacterium aurantiacum	AcOrf-81 peptide
NC_001623.1_NP_054111.1	AF-E8R063-F1-model_v4	7.158	17	0.09772	0.016	0.3777	Isosphaera pallida ATCC 43644	AcOrf-81 peptide
NC_001623.1_NP_054132.1	AF-A0A3S0EMB7-F1-model_v4	2.532e-05	169	0.4988	1	0.6901	Ancylobacter aquaticus	AcOrf-102
NC_001623.1_NP_054132.1	AF-A0A1W1DIW8-F1-model_v4	0.9007	47	0.2801	0.382	0.5501	hydrothermal vent metagenome	AcOrf-102
NC_001623.1_NP_054132.1	AF-A0A1I1DCH8-F1-model_v4	1.02	38	0.2108	0.179	0.5156	Butyrivibrio sp. YAB3001	AcOrf-102
NC_001623.1_NP_054132.1	AF-A0A366RBW1-F1-model_v4	4.805	33	0.2438	0.116	0.5282	Fusarium coffeatum	AcOrf-102
NC_001623.1_NP_054132.1	AF-A0A7R9WBL4-F1-model_v4	5.787	28	0.2098	0.076	0.4883	Pseudictyota dubia	AcOrf-102
NC_001623.1_NP_054132.1	AF-A0A849QDF1-F1-model_v4	4.805	25	0.1619	0.057	0.4679	Nanohaloarchaea archaeon	AcOrf-102
NC_001623.1_NP_054132.1	AF-A0A1V5VPH3-F1-model_v4	8.395	24	0.1754	0.051	0.4736	Microgenomates group bacterium ADurb.Bin219	AcOrf-102
NC_001623.1_NP_054132.1	AF-A0A1D1ZXK5-F1-model_v4	8.932	23	0.1761	0.045	0.4721	Auxenochlorella protothecoides	AcOrf-102
NC_001623.1_NP_054137.1	AF-A0A1I8NIZ5-F1-model_v4	7.797	27	0.2231	0.069	0.7663	Musca domestica	AcOrf-107 peptide
NC_001623.1_NP_054137.1	AF-A0A0A9GQT5-F1-model_v4	6.667	25	0.1796	0.057	0.7806	Arundo donax	AcOrf-107 peptide
NC_001623.1_NP_054144.1	AF-A0A0A1TQT1-F1-model_v4	2.12e-10	325	0.6463	1	0.4804	[Torrubiella] hemipterigena	AcOrf-114 peptide
NC_001623.1_NP_054144.1	AF-A0A812R7F4-F1-model_v4	1.247e-09	299	0.6078	1	0.4881	Symbiodinium natans	AcOrf-114 peptide
NC_001623.1_NP_054144.1	AF-N9USR5-F1-model_v4	8.749e-10	285	0.5721	1	0.4598	Entamoeba histolytica HM-1:IMSS-A	AcOrf-114 peptide
NC_001623.1_NP_054144.1	AF-A0A366PWM1-F1-model_v4	1.967e-09	285	0.5961	1	0.467	Fusarium verticillioides	AcOrf-114 peptide
NC_001623.1_NP_054144.1	AF-A0A1Y1N6B8-F1-model_v4	1.127e-09	285	0.5996	1	0.4468	Photinus pyralis	AcOrf-114 peptide
NC_001623.1_NP_054144.1	AF-A0A2P6NQW6-F1-model_v4	2.803e-09	282	0.6043	1	0.4618	Planoprotostelium fungivorum	AcOrf-114 peptide
NC_001623.1_NP_054144.1	AF-A0A817YYN1-F1-model_v4	7.717e-09	281	0.647	1	0.4621	Rotaria sp. Silwood1	AcOrf-114 peptide
NC_001623.1_NP_054144.1	AF-A0A5N6L2Y4-F1-model_v4	4.422e-09	273	0.6131	1	0.4435	Carpinus fangiana	AcOrf-114 peptide
NC_001623.1_NP_054144.1	AF-I3KQ75-F1-model_v4	1.825e-08	273	0.6455	1	0.47	Oreochromis niloticus	AcOrf-114 peptide
NC_001623.1_NP_054144.1	AF-A0A2K0TTM8-F1-model_v4	8.54e-09	271	0.6177	1	0.4553	Trichoderma gamsii	AcOrf-114 peptide
NC_001623.1_NP_054144.1	AF-A0A162K264-F1-model_v4	3.611e-09	271	0.5822	1	0.4509	Akanthomyces lecanii RCEF 1005	AcOrf-114 peptide
NC_001623.1_NP_054144.1	AF-A0A1Q9C3Z5-F1-model_v4	4.422e-09	269	0.5774	1	0.457	Symbiodinium microadriaticum	AcOrf-114 peptide
NC_001623.1_NP_054144.1	AF-A0A1I7ZPM0-F1-model_v4	1.568e-08	266	0.6331	1	0.4495	Steinernema glaseri	AcOrf-114 peptide
NC_001623.1_NP_054144.1	AF-A0A7J8GEU1-F1-model_v4	4.103e-08	266	0.6461	1	0.4764	Rousettus aegyptiacus	AcOrf-114 peptide
NC_001623.1_NP_054144.1	AF-A0A447CA17-F1-model_v4	3.102e-09	265	0.5724	1	0.4355	Podospora comata	AcOrf-114 peptide
NC_001623.1_NP_054144.1	AF-A0A0J0XQG1-F1-model_v4	2.879e-08	262	0.6156	1	0.4718	Cutaneotrichosporon oleaginosum	AcOrf-114 peptide
NC_001623.1_NP_054144.1	AF-B4DX76-F1-model_v4	3.525e-08	262	0.6284	1	0.4667	Homo sapiens	AcOrf-114 peptide
NC_001623.1_NP_054144.1	AF-A0A7J6AHZ4-F1-model_v4	5.147e-09	261	0.5708	1	0.4384	Ameiurus melas	AcOrf-114 peptide
NC_001623.1_NP_054144.1	AF-A0A834EDP4-F1-model_v4	4.54e-08	260	0.6294	1	0.47	Phyllostomus discolor	AcOrf-114 peptide
NC_001623.1_NP_054144.1	AF-A0A4Y2F9R8-F1-model_v4	2.02e-08	260	0.6007	1	0.4595	Araneus ventricosus	AcOrf-114 peptide
NC_001623.1_NP_054144.1	AF-Q4SL14-F1-model_v4	6.302e-09	257	0.5584	1	0.4419	Tetraodon nigroviridis	AcOrf-114 peptide
NC_001623.1_NP_054144.1	AF-A0A087XJD5-F1-model_v4	1.49e-08	256	0.5875	1	0.4457	Poecilia formosa	AcOrf-114 peptide
NC_001623.1_NP_054144.1	AF-A0A4W6F2B2-F1-model_v4	3.9e-08	253	0.5888	1	0.4706	Lates calcarifer	AcOrf-114 peptide
NC_001623.1_NP_054144.1	AF-A0A811KWL9-F1-model_v4	1.28e-08	253	0.5594	1	0.4523	Bursaphelenchus okinawaensis	AcOrf-114 peptide
NC_001623.1_NP_054144.1	AF-A0A1J1HID5-F1-model_v4	6.808e-08	252	0.6273	1	0.4594	Clunio marinus	AcOrf-114 peptide
NC_001623.1_NP_054144.1	AF-A0A2D0SGQ6-F1-model_v4	1.347e-08	251	0.5555	1	0.4516	Ictalurus punctatus	AcOrf-114 peptide
NC_001623.1_NP_054144.1	AF-A0A672H433-F1-model_v4	5.559e-08	251	0.6027	1	0.4667	Salarias fasciatus	AcOrf-114 peptide
NC_001623.1_NP_054144.1	AF-A0A1D2M6T0-F1-model_v4	9.45e-09	251	0.5575	1	0.4348	Orchesella cincta	AcOrf-114 peptide
NC_001623.1_NP_054144.1	AF-A0A179HJN9-F1-model_v4	7.717e-09	248	0.5457	1	0.4291	Purpureocillium lilacinum	AcOrf-114 peptide
NC_001623.1_NP_054144.1	AF-A0A7S0A104-F1-model_v4	7.336e-09	248	0.5266	1	0.4437	Pyrodinium bahamense	AcOrf-114 peptide
NC_001623.1_NP_054144.1	AF-E9Q088-F1-model_v4	2.473e-08	248	0.576	1	0.4435	Mus musculus	AcOrf-114 peptide
NC_001623.1_NP_054144.1	AF-A0A6G1IYD1-F1-model_v4	4.54e-08	247	0.6167	1	0.4315	Lentithecium fluviatile CBS 122367	AcOrf-114 peptide
NC_001623.1_NP_054144.1	AF-A0A673N3W5-F1-model_v4	2.02e-08	247	0.5739	1	0.4368	Sinocyclocheilus rhinocerous	AcOrf-114 peptide
NC_001623.1_NP_054144.1	AF-A0A7C8MNQ4-F1-model_v4	2.473e-08	247	0.5899	1	0.4294	Xylaria multiplex	AcOrf-114 peptide
NC_001623.1_NP_054144.1	AF-Q9N5L4-F1-model_v4	8.317e-10	247	0.5101	1	0.3855	Caenorhabditis elegans	AcOrf-114 peptide
NC_001623.1_NP_054144.1	AF-A0A2K3QER2-F1-model_v4	3.9e-08	247	0.5723	1	0.4609	Tolypocladium capitatum	AcOrf-114 peptide
NC_001623.1_NP_054144.1	AF-A0A0S7FKW7-F1-model_v4	4.651e-09	245	0.5291	1	0.4146	Poeciliopsis prolifica	AcOrf-114 peptide
NC_001623.1_NP_054144.1	AF-A0A6G5AAG3-F1-model_v4	1.417e-08	244	0.5505	1	0.432	Rhipicephalus microplus	AcOrf-114 peptide
NC_001623.1_NP_054144.1	AF-A0A7J8DQF7-F1-model_v4	5.559e-08	242	0.5906	1	0.4407	Molossus molossus	AcOrf-114 peptide
NC_001623.1_NP_054144.1	AF-A0A671R279-F1-model_v4	5.147e-09	242	0.5207	1	0.416	Sinocyclocheilus anshuiensis	AcOrf-114 peptide
NC_001623.1_NP_054144.1	AF-A0A226E3L1-F1-model_v4	3.799e-09	241	0.5251	1	0.3994	Folsomia candida	AcOrf-114 peptide
NC_001623.1_NP_054144.1	AF-A0A814S8G5-F1-model_v4	6.974e-09	240	0.5083	1	0.4262	Didymodactylos carnosus	AcOrf-114 peptide
NC_001623.1_NP_054144.1	AF-A0A7J7UXW5-F1-model_v4	3.028e-08	240	0.5628	1	0.4329	Rhinolophus ferrumequinum	AcOrf-114 peptide
NC_001623.1_NP_054144.1	AF-A0A369RWB2-F1-model_v4	2.671e-07	240	0.6271	1	0.4666	Trichoplax sp. H2	AcOrf-114 peptide
NC_001623.1_NP_054144.1	AF-A0A7M7KW74-F1-model_v4	4.316e-08	240	0.5559	1	0.4515	Varroa destructor	AcOrf-114 peptide
NC_001623.1_NP_054144.1	AF-A0A0B1SIR2-F1-model_v4	9.703e-08	239	0.6132	1	0.4359	Oesophagostomum dentatum	AcOrf-114 peptide
NC_001623.1_NP_054144.1	AF-A0A6J2QQ10-F1-model_v4	2.02e-08	236	0.539	1	0.4253	Cottoperca gobio	AcOrf-114 peptide
NC_001623.1_NP_054144.1	AF-A0A1Y1ZN81-F1-model_v4	2.351e-08	235	0.5382	1	0.4271	Clohesyomyces aquaticus	AcOrf-114 peptide
NC_001623.1_NP_054144.1	AF-A0A1I7S3K5-F1-model_v4	2.473e-08	234	0.5426	1	0.4211	Bursaphelenchus xylophilus	AcOrf-114 peptide
NC_001623.1_NP_054144.1	AF-J9FPZ7-F1-model_v4	2.601e-08	233	0.5482	1	0.4154	Oxytricha trifallax	AcOrf-114 peptide
NC_001623.1_NP_054144.1	AF-A0A1V9YC24-F1-model_v4	9.703e-08	233	0.5787	1	0.4385	Achlya hypogyna	AcOrf-114 peptide
NC_001623.1_NP_054144.1	AF-A0A3B3RP14-F1-model_v4	2.539e-07	233	0.6052	1	0.4532	Paramormyrops kingsleyae	AcOrf-114 peptide
NC_001623.1_NP_054144.1	AF-A0A6A5GWL5-F1-model_v4	1.247e-09	233	0.4764	1	0.3798	Caenorhabditis remanei	AcOrf-114 peptide
NC_001623.1_NP_054144.1	AF-A0A2H4SMT8-F1-model_v4	1.129e-07	233	0.5746	1	0.4468	Cordyceps militaris	AcOrf-114 peptide
NC_001623.1_NP_054144.1	AF-A0A0P7V193-F1-model_v4	2.539e-07	232	0.6034	1	0.4505	Scleropages formosus	AcOrf-114 peptide
NC_001623.1_NP_054144.1	AF-A0A4U7KZJ5-F1-model_v4	5.696e-09	232	0.4978	1	0.402	Sporisorium graminicola	AcOrf-114 peptide
NC_001623.1_NP_054144.1	AF-A0A2A2JAH5-F1-model_v4	1.694e-07	230	0.5955	1	0.4333	Diploscapter pachys	AcOrf-114 peptide
NC_001623.1_NP_054144.1	AF-A0A6P8VWG8-F1-model_v4	1.825e-08	230	0.5235	1	0.4116	Gymnodraco acuticeps	AcOrf-114 peptide
NC_001623.1_NP_054144.1	AF-A0A3Q3RW74-F1-model_v4	3.525e-08	229	0.5272	1	0.4258	Mastacembelus armatus	AcOrf-114 peptide
NC_001623.1_NP_054144.1	AF-A0A177C0G8-F1-model_v4	3.185e-08	228	0.5483	1	0.4018	Paraphaeosphaeria sporulosa	AcOrf-114 peptide
NC_001623.1_NP_054144.1	AF-A0A0F9XT97-F1-model_v4	1.874e-07	227	0.5773	1	0.4424	Trichoderma harzianum	AcOrf-114 peptide
NC_001623.1_NP_054144.1	AF-A0A814EYQ9-F1-model_v4	6.808e-08	226	0.5533	1	0.4189	Adineta steineri	AcOrf-114 peptide
NC_001623.1_NP_054144.1	AF-A0A668URE5-F1-model_v4	9.703e-08	226	0.5638	1	0.4238	Oreochromis aureus	AcOrf-114 peptide
NC_001623.1_NP_054144.1	AF-A0A0B2V8W8-F1-model_v4	2.671e-07	226	0.5832	1	0.4458	Toxocara canis	AcOrf-114 peptide
NC_001623.1_NP_054144.1	AF-A0A669CSD3-F1-model_v4	2.473e-08	225	0.5195	1	0.4061	Oreochromis niloticus	AcOrf-114 peptide
NC_001623.1_NP_054144.1	AF-A0A7S0XY21-F1-model_v4	4.776e-08	225	0.5428	1	0.4092	Hemiselmis andersenii	AcOrf-114 peptide
NC_001623.1_NP_054144.1	AF-A0A139AN14-F1-model_v4	8.769e-08	225	0.5542	1	0.4211	Gonapodya prolifera JEL478	AcOrf-114 peptide
NC_001623.1_NP_054144.1	AF-A0A6P7P7Z5-F1-model_v4	6.152e-08	225	0.5306	1	0.4292	Betta splendens	AcOrf-114 peptide
NC_001623.1_NP_054144.1	AF-Q23CV5-F1-model_v4	5.991e-09	224	0.484	1	0.387	Tetrahymena thermophila SB210	AcOrf-114 peptide
NC_001623.1_NP_054144.1	AF-A0A6I9Y985-F1-model_v4	6.317e-07	224	0.6144	1	0.4481	Thamnophis sirtalis	AcOrf-114 peptide
NC_001623.1_NP_054144.1	AF-A0A0N5AGM0-F1-model_v4	1.188e-07	224	0.5659	1	0.4225	Syphacia muris	AcOrf-114 peptide
NC_001623.1_NP_054144.1	AF-A0A0C2X9D8-F1-model_v4	5.285e-08	223	0.5093	1	0.4336	Amanita muscaria Koide BX008	AcOrf-114 peptide
NC_001623.1_NP_054144.1	AF-A0A7J7IU25-F1-model_v4	4.316e-08	223	0.5199	1	0.4172	Bugula neritina	AcOrf-114 peptide
NC_001623.1_NP_054144.1	AF-Q4RE60-F1-model_v4	7.735e-07	222	0.6094	1	0.4551	Tetraodon nigroviridis	AcOrf-114 peptide
NC_001623.1_NP_054144.1	AF-A0A6G0I286-F1-model_v4	3.185e-08	221	0.5046	1	0.4123	Larimichthys crocea	AcOrf-114 peptide
NC_001623.1_NP_054144.1	AF-A0A0H5R9N5-F1-model_v4	1.315e-07	221	0.5211	1	0.4472	Spongospora subterranea	AcOrf-114 peptide
NC_001623.1_NP_054144.1	AF-A0A397ETG3-F1-model_v4	4.904e-07	220	0.5846	1	0.4471	Aphanomyces astaci	AcOrf-114 peptide
NC_001623.1_NP_054144.1	AF-A0A7S4SEB3-F1-model_v4	2.539e-07	220	0.5704	1	0.4319	Alexandrium monilatum	AcOrf-114 peptide
NC_001623.1_NP_054144.1	AF-A0A6P6Y148-F1-model_v4	2.736e-08	220	0.5012	1	0.4067	Dermatophagoides pteronyssinus	AcOrf-114 peptide
NC_001623.1_NP_054144.1	AF-A0A1A8QUL5-F1-model_v4	2.736e-08	220	0.5058	1	0.4015	Nothobranchius pienaari	AcOrf-114 peptide
NC_001623.1_NP_054144.1	AF-A0A091GQ26-F1-model_v4	1.35e-06	219	0.6129	1	0.4616	Buceros rhinoceros silvestris	AcOrf-114 peptide
NC_001623.1_NP_054144.1	AF-A0A665VDF7-F1-model_v4	5.559e-08	218	0.5174	1	0.409	Echeneis naucrates	AcOrf-114 peptide
NC_001623.1_NP_054144.1	AF-A0A2A2JRB6-F1-model_v4	2.02e-08	218	0.4984	1	0.392	Diploscapter pachys	AcOrf-114 peptide
NC_001623.1_NP_054144.1	AF-A0A672KX73-F1-model_v4	2.181e-07	217	0.5486	1	0.4305	Sinocyclocheilus grahami	AcOrf-114 peptide
NC_001623.1_NP_054144.1	AF-A0A3S2M494-F1-model_v4	5.559e-08	217	0.505	1	0.4159	Oryzias javanicus	AcOrf-114 peptide
NC_001623.1_NP_054144.1	AF-W2T9W2-F1-model_v4	5.024e-08	216	0.5141	1	0.4025	Necator americanus	AcOrf-114 peptide
NC_001623.1_NP_054144.1	AF-A0A6P7J9F1-F1-model_v4	3.708e-08	215	0.5019	1	0.3984	Parambassis ranga	AcOrf-114 peptide
NC_001623.1_NP_054144.1	AF-A0A1A8EZW0-F1-model_v4	2.479e-06	213	0.6344	1	0.4489	Nothobranchius korthausae	AcOrf-114 peptide
NC_001623.1_NP_054144.1	AF-A0A0G4FF91-F1-model_v4	5.159e-07	213	0.58	1	0.4242	Vitrella brassicaformis CCMP3155	AcOrf-114 peptide
NC_001623.1_NP_054144.1	AF-A0A3B4VP82-F1-model_v4	1.53e-07	213	0.5454	1	0.4036	Seriola dumerili	AcOrf-114 peptide
NC_001623.1_NP_054144.1	AF-A0A016T1E4-F1-model_v4	2.02e-08	211	0.4995	1	0.3656	Ancylostoma ceylanicum	AcOrf-114 peptide
NC_001623.1_NP_054144.1	AF-A0A6J0D8M0-F1-model_v4	9.703e-08	211	0.5181	1	0.4019	Peromyscus maniculatus bairdii	AcOrf-114 peptide
NC_001623.1_NP_054144.1	AF-A0A0S7FG78-F1-model_v4	8.769e-08	210	0.509	1	0.4008	Poeciliopsis prolifica	AcOrf-114 peptide
NC_001623.1_NP_054144.1	AF-A0A818G1R0-F1-model_v4	8.336e-08	209	0.4982	1	0.4026	Rotaria socialis	AcOrf-114 peptide
NC_001623.1_NP_054144.1	AF-A0A4U5M6E8-F1-model_v4	1.103e-06	208	0.5903	1	0.4275	Steinernema carpocapsae	AcOrf-114 peptide
NC_001623.1_NP_054144.1	AF-W2RJ01-F1-model_v4	1.494e-06	206	0.5866	1	0.4304	Cyphellophora europaea CBS 101466	AcOrf-114 peptide
NC_001623.1_NP_054144.1	AF-A0A3R6YIE9-F1-model_v4	1.874e-07	206	0.5111	1	0.4119	Aphanomyces astaci	AcOrf-114 peptide
NC_001623.1_NP_054144.1	AF-A0A2A2JR72-F1-model_v4	1.129e-07	206	0.5053	1	0.3969	Diploscapter pachys	AcOrf-114 peptide
NC_001623.1_NP_054144.1	AF-S3CNL9-F1-model_v4	6.005e-07	205	0.5342	1	0.433	Ophiostoma piceae UAMH 11346	AcOrf-114 peptide
NC_001623.1_NP_054144.1	AF-A0A016T1A2-F1-model_v4	3.807e-07	204	0.546	1	0.4023	Ancylostoma ceylanicum	AcOrf-114 peptide
NC_001623.1_NP_054144.1	AF-A0A7I5EA99-F1-model_v4	1.315e-07	203	0.5011	1	0.3926	Haemonchus contortus	AcOrf-114 peptide
NC_001623.1_NP_054144.1	AF-A0A0K2UVC4-F1-model_v4	4.005e-07	202	0.5264	1	0.409	Lepeophtheirus salmonis	AcOrf-114 peptide
NC_001623.1_NP_054144.1	AF-V9LTT8-F1-model_v4	1.188e-07	202	0.4985	1	0.3901	Crithidia mellificae	AcOrf-114 peptide
NC_001623.1_NP_054144.1	AF-A0A226E3I3-F1-model_v4	7.533e-08	202	0.4854	1	0.3823	Folsomia candida	AcOrf-114 peptide
NC_001623.1_NP_054144.1	AF-A0A3Q1GYX3-F1-model_v4	5.848e-08	202	0.481	1	0.38	Anabas testudineus	AcOrf-114 peptide
NC_001623.1_NP_054144.1	AF-A0A1D2NDH5-F1-model_v4	8.559e-07	201	0.5351	1	0.4292	Orchesella cincta	AcOrf-114 peptide
NC_001623.1_NP_054144.1	AF-A0A820RWW3-F1-model_v4	1.786e-05	198	0.6399	1	0.4739	Rotaria magnacalcarata	AcOrf-114 peptide
NC_001623.1_NP_054144.1	AF-A0A267GIW2-F1-model_v4	9.224e-08	197	0.4755	1	0.3803	Macrostomum lignano	AcOrf-114 peptide
NC_001623.1_NP_054144.1	AF-A0A7J7B636-F1-model_v4	1.22e-06	196	0.5304	1	0.4268	Abscondita terminalis	AcOrf-114 peptide
NC_001623.1_NP_054144.1	AF-A0A2P6NFQ0-F1-model_v4	9.725e-06	194	0.59	1	0.4599	Planoprotostelium fungivorum	AcOrf-114 peptide
NC_001623.1_NP_054144.1	AF-A0A196S962-F1-model_v4	3.533e-06	193	0.5715	1	0.4254	Blastocystis sp. ATCC 50177/Nand II	AcOrf-114 peptide
NC_001623.1_NP_054144.1	AF-A0A7S4Q6R0-F1-model_v4	7.753e-05	193	0.685	1	0.4972	Alexandrium monilatum	AcOrf-114 peptide
NC_001623.1_NP_054144.1	AF-A0A183FXP4-F1-model_v4	8.789e-06	193	0.601	1	0.4427	Heligmosomoides polygyrus	AcOrf-114 peptide
NC_001623.1_NP_054144.1	AF-A0A498SHZ5-F1-model_v4	1.924e-06	192	0.5422	1	0.4174	Acanthocheilonema viteae	AcOrf-114 peptide
NC_001623.1_NP_054144.1	AF-U5DJL4-F1-model_v4	1.653e-06	191	0.528	1	0.4177	Rubidibacter lacunae KORDI 51-2	AcOrf-114 peptide
NC_001623.1_NP_054144.1	AF-A0A016T1M4-F1-model_v4	6.166e-06	190	0.5817	1	0.4289	Ancylostoma ceylanicum	AcOrf-114 peptide
NC_001623.1_NP_054144.1	AF-R7TD56-F1-model_v4	8.789e-06	189	0.5793	1	0.4412	Capitella teleta	AcOrf-114 peptide
NC_001623.1_NP_054144.1	AF-A0A2P6MZW6-F1-model_v4	2.24e-06	188	0.5028	1	0.4374	Planoprotostelium fungivorum	AcOrf-114 peptide
NC_001623.1_NP_054144.1	AF-A0A814ZQA9-F1-model_v4	1.048e-06	188	0.5155	1	0.3967	Rotaria sordida	AcOrf-114 peptide
NC_001623.1_NP_054144.1	AF-A0A7R8ZLY9-F1-model_v4	1.494e-06	187	0.513	1	0.4069	Cyprideis torosa	AcOrf-114 peptide
NC_001623.1_NP_054144.1	AF-A0A1I7YLU2-F1-model_v4	9.004e-07	186	0.4972	1	0.3984	Steinernema glaseri	AcOrf-114 peptide
NC_001623.1_NP_054144.1	AF-A0A3P6T8E2-F1-model_v4	5.862e-06	185	0.5578	1	0.4188	Litomosoides sigmodontis	AcOrf-114 peptide
NC_001623.1_NP_054144.1	AF-A0A7S0P4U9-F1-model_v4	3.116e-05	184	0.6197	1	0.4501	Calcidiscus leptoporus	AcOrf-114 peptide
NC_001623.1_NP_054144.1	AF-A0A1D2M168-F1-model_v4	4.662e-07	182	0.427	1	0.4158	Orchesella cincta	AcOrf-114 peptide
NC_001623.1_NP_054144.1	AF-A0A1X0P5Q5-F1-model_v4	8.559e-07	182	0.4967	1	0.378	Trypanosoma theileri	AcOrf-114 peptide
NC_001623.1_NP_054144.1	AF-X6M859-F1-model_v4	1.571e-06	181	0.5115	1	0.3868	Reticulomyxa filosa	AcOrf-114 peptide
NC_001623.1_NP_054144.1	AF-A0A7S3PEB9-F1-model_v4	6.645e-07	181	0.4616	1	0.3939	Aplanochytrium stocchinoi	AcOrf-114 peptide
NC_001623.1_NP_054144.1	AF-W2JIE6-F1-model_v4	1.35e-06	181	0.4684	1	0.4123	Phytophthora parasitica	AcOrf-114 peptide
NC_001623.1_NP_054144.1	AF-A0A4Z0YVT7-F1-model_v4	7.735e-07	178	0.4593	1	0.3887	Xylaria hypoxylon	AcOrf-114 peptide
NC_001623.1_NP_054144.1	AF-A8ZXE3-F1-model_v4	9.725e-06	177	0.528	1	0.4277	Desulfosudis oleivorans Hxd3	AcOrf-114 peptide
NC_001623.1_NP_054144.1	AF-A0A0A6P2X0-F1-model_v4	9.725e-06	177	0.5415	1	0.4181	Candidatus Thiomargarita nelsonii	AcOrf-114 peptide
NC_001623.1_NP_054144.1	AF-A0A813FWP8-F1-model_v4	4.787e-06	177	0.5111	1	0.4095	Polarella glacialis	AcOrf-114 peptide
NC_001623.1_NP_054144.1	AF-A0A0R3QAQ4-F1-model_v4	7.942e-06	171	0.5402	1	0.3837	Brugia timori	AcOrf-114 peptide
NC_001623.1_NP_054144.1	AF-I7MMA3-F1-model_v4	5.159e-07	170	0.4282	1	0.3639	Tetrahymena thermophila SB210	AcOrf-114 peptide
NC_001623.1_NP_054144.1	AF-A0A817Y4P3-F1-model_v4	9.471e-07	170	0.4531	1	0.3659	Rotaria sp. Silwood1	AcOrf-114 peptide
NC_001623.1_NP_054144.1	AF-A0A1Y2GBS6-F1-model_v4	4.551e-06	167	0.4752	1	0.3936	Lobosporangium transversale	AcOrf-114 peptide
NC_001623.1_NP_054144.1	AF-A0A197JPU6-F1-model_v4	5.036e-06	167	0.4744	1	0.3984	Linnemannia elongata AG-77	AcOrf-114 peptide
NC_001623.1_NP_054144.1	AF-J9EHK6-F1-model_v4	9.493e-05	165	0.5964	1	0.4264	Wuchereria bancrofti	AcOrf-114 peptide
NC_001623.1_NP_054144.1	AF-A0A1D2M2G4-F1-model_v4	1.829e-06	164	0.4401	1	0.3723	Orchesella cincta	AcOrf-114 peptide
NC_001623.1_NP_054144.1	AF-A0A0C2GLW5-F1-model_v4	9.025e-05	163	0.5731	1	0.4321	Ancylostoma duodenale	AcOrf-114 peptide
NC_001623.1_NP_054144.1	AF-A0A813DTG2-F1-model_v4	3.035e-06	161	0.4365	1	0.3822	Polarella glacialis	AcOrf-114 peptide
NC_001623.1_NP_054144.1	AF-A0A225VM92-F1-model_v4	1.253e-05	160	0.4711	1	0.4062	Phytophthora megakarya	AcOrf-114 peptide
NC_001623.1_NP_054144.1	AF-A0A7M7KWC0-F1-model_v4	2.186e-05	160	0.4888	1	0.4115	Varroa destructor	AcOrf-114 peptide
NC_001623.1_NP_054144.1	AF-A0A815BHK0-F1-model_v4	0.0002749	159	0.604	1	0.4461	Didymodactylos carnosus	AcOrf-114 peptide
NC_001623.1_NP_054144.1	AF-H7EKF3-F1-model_v4	7.753e-05	153	0.5391	1	0.396	Treponema saccharophilum DSM 2985	AcOrf-114 peptide
NC_001623.1_NP_054144.1	AF-A0A158R2I0-F1-model_v4	1.534e-05	152	0.4476	1	0.3922	Nippostrongylus brasiliensis	AcOrf-114 peptide
NC_001623.1_NP_054144.1	AF-A0A0C3MBH6-F1-model_v4	0.00032	150	0.5689	1	0.4303	Tulasnella calospora MUT 4182	AcOrf-114 peptide
NC_001623.1_NP_054144.1	AF-A0A812Q8C1-F1-model_v4	4.014e-05	149	0.4755	1	0.393	Symbiodinium natans	AcOrf-114 peptide
NC_001623.1_NP_054144.1	AF-A0A0D2QCL8-F1-model_v4	5.722e-05	147	0.4696	1	0.4067	Gossypium raimondii	AcOrf-114 peptide
NC_001623.1_NP_054144.1	AF-G0QQB5-F1-model_v4	5.171e-05	145	0.4792	1	0.3841	Ichthyophthirius multifiliis strain G5	AcOrf-114 peptide
NC_001623.1_NP_054144.1	AF-A0A2P4QVH3-F1-model_v4	1.786e-05	145	0.4144	1	0.3923	Rhizophagus irregularis DAOM 181602=DAOM 197198	AcOrf-114 peptide
NC_001623.1_NP_054144.1	AF-F1W2H9-F1-model_v4	9.245e-06	143	0.4144	1	0.356	Oxalobacteraceae bacterium IMCC9480	AcOrf-114 peptide
NC_001623.1_NP_054144.1	AF-A0A497QJY6-F1-model_v4	6.331e-05	139	0.4359	1	0.3935	Candidatus Lokiarchaeota archaeon	AcOrf-114 peptide
NC_001623.1_NP_054144.1	AF-A0A7E5VD35-F1-model_v4	0.0004798	132	0.5515	1	0.3612	Trichoplusia ni	AcOrf-114 peptide
NC_001623.1_NP_054144.1	AF-A0A812Z344-F1-model_v4	0.001135	129	0.5458	1	0.3956	Symbiodinium sp. CCMP2456	AcOrf-114 peptide
NC_001623.1_NP_054144.1	AF-A0A0D8XX85-F1-model_v4	0.002823	128	0.5703	1	0.4276	Dictyocaulus viviparus	AcOrf-114 peptide
NC_001623.1_NP_054144.1	AF-A0A2D4GK70-F1-model_v4	0.0008809	117	0.4915	1	0.3454	Micrurus corallinus	AcOrf-114 peptide
NC_001623.1_NP_054144.1	AF-A0A819JYT4-F1-model_v4	3.278e-05	117	0.307	1	0.3705	Rotaria sp. Silwood1	AcOrf-114 peptide
NC_001623.1_NP_054144.1	AF-A0A821N8D5-F1-model_v4	2.677e-05	117	0.3638	1	0.3069	Pieris macdunnoughi	AcOrf-114 peptide
NC_001623.1_NP_054144.1	AF-A0A6J2JGX9-F1-model_v4	7.753e-05	117	0.3908	1	0.322	Bombyx mandarina	AcOrf-114 peptide
NC_001623.1_NP_054144.1	AF-A0A0D2X2C5-F1-model_v4	0.001256	117	0.5102	1	0.3535	Capsaspora owczarzaki ATCC 30864	AcOrf-114 peptide
NC_001623.1_NP_054144.1	AF-A0A812WYL9-F1-model_v4	0.007022	116	0.5769	1	0.4	Symbiodinium sp. CCMP2456	AcOrf-114 peptide
NC_001623.1_NP_054144.1	AF-A0A433Q5S9-F1-model_v4	0.00032	115	0.3876	1	0.3754	Jimgerdemannia flammicorona	AcOrf-114 peptide
NC_001623.1_NP_054144.1	AF-A0A0D6LZP3-F1-model_v4	0.002551	114	0.477	1	0.3978	Ancylostoma ceylanicum	AcOrf-114 peptide
NC_001623.1_NP_054144.1	AF-A0A2H5TCA5-F1-model_v4	0.002191	113	0.4533	1	0.4048	Rhizophagus irregularis DAOM 181602=DAOM 197198	AcOrf-114 peptide
NC_001623.1_NP_054144.1	AF-A0A1C3VZH2-F1-model_v4	0.01661	112	0.6197	1	0.4005	Rhizobium hainanense	AcOrf-114 peptide
NC_001623.1_NP_054144.1	AF-A0A3P7JGT1-F1-model_v4	0.006033	112	0.5799	1	0.3609	Strongylus vulgaris	AcOrf-114 peptide
NC_001623.1_NP_054144.1	AF-A0A419HV75-F1-model_v4	0.002305	111	0.5026	1	0.35	Pseudonocardiaceae bacterium YIM PH 21723	AcOrf-114 peptide
NC_001623.1_NP_054144.1	AF-A0A812T972-F1-model_v4	0.002969	109	0.5516	1	0.3222	Symbiodinium sp. CCMP2456	AcOrf-114 peptide
NC_001623.1_NP_054144.1	AF-A0A813MD66-F1-model_v4	0.02139	104	0.6137	1	0.3676	Adineta steineri	AcOrf-114 peptide
NC_001623.1_NP_054144.1	AF-A0A820DZA2-F1-model_v4	0.01747	103	0.5549	1	0.3805	Adineta steineri	AcOrf-114 peptide
NC_001623.1_NP_054144.1	AF-A0A1H9NRQ9-F1-model_v4	0.03927	102	0.6034	1	0.3972	Lentzea albida	AcOrf-114 peptide
NC_001623.1_NP_054144.1	AF-A0A1Y4B536-F1-model_v4	0.004683	98	0.4483	0.999	0.3413	Eubacterium sp. An3	AcOrf-114 peptide
NC_001623.1_NP_054144.1	AF-A0A016VK22-F1-model_v4	0.0249	98	0.5585	0.999	0.369	Ancylostoma ceylanicum	AcOrf-114 peptide
NC_001623.1_NP_054144.1	AF-A0A553HWP9-F1-model_v4	0.001389	97	0.3874	0.999	0.3212	Xylaria flabelliformis	AcOrf-114 peptide
NC_001623.1_NP_054144.1	AF-A0A5C7PCY1-F1-model_v4	0.1028	96	0.6669	0.999	0.3851	Actinomycetia bacterium	AcOrf-114 peptide
NC_001623.1_NP_054144.1	AF-A0A1C7HHB2-F1-model_v4	0.06194	96	0.6052	0.999	0.383	Burkholderiales bacterium YL45	AcOrf-114 peptide
NC_001623.1_NP_054144.1	AF-A0A5N5KH57-F1-model_v4	0.07585	96	0.5792	0.999	0.4145	Salix brachista	AcOrf-114 peptide
NC_001623.1_NP_054144.1	AF-A0A5E4BSI9-F1-model_v4	0.02619	96	0.5409	0.999	0.3632	Marmota monax	AcOrf-114 peptide
NC_001623.1_NP_054144.1	AF-H3KBR5-F1-model_v4	0.09288	95	0.6029	0.998	0.4089	Sutterella parvirubra YIT 11816	AcOrf-114 peptide
NC_001623.1_NP_054144.1	AF-A0A2G9UWP4-F1-model_v4	0.03207	95	0.5579	0.998	0.3595	Teladorsagia circumcincta	AcOrf-114 peptide
NC_001623.1_NP_054144.1	AF-C3N220-F1-model_v4	0.03374	94	0.5617	0.998	0.3551	Sulfolobus islandicus M.16.27	AcOrf-114 peptide
NC_001623.1_NP_054144.1	AF-A0A3R6KHR5-F1-model_v4	0.009045	94	0.4798	0.998	0.3255	Roseburia sp. AM59-24XD	AcOrf-114 peptide
NC_001623.1_NP_054144.1	AF-A0A0A1UQV4-F1-model_v4	0.01933	94	0.5077	0.998	0.3527	Metarhizium robertsii	AcOrf-114 peptide
NC_001623.1_NP_054144.1	AF-A0A0D8YAW1-F1-model_v4	0.06194	94	0.5742	0.998	0.3864	Dictyocaulus viviparus	AcOrf-114 peptide
NC_001623.1_NP_054144.1	AF-A0A1Z5SCE4-F1-model_v4	0.04131	93	0.5471	0.998	0.3708	Sorghum bicolor	AcOrf-114 peptide
NC_001623.1_NP_054144.1	AF-A0A7J8BCL6-F1-model_v4	0.05322	92	0.5679	0.997	0.3646	Rousettus aegyptiacus	AcOrf-114 peptide
NC_001623.1_NP_054144.1	AF-Q9H678-F1-model_v4	0.04572	92	0.5664	0.997	0.3567	Homo sapiens	AcOrf-114 peptide
NC_001623.1_NP_054144.1	AF-A0A7J8BCK9-F1-model_v4	0.03374	92	0.5352	0.997	0.3531	Rousettus aegyptiacus	AcOrf-114 peptide
NC_001623.1_NP_054144.1	AF-A0A1Q9CEG0-F1-model_v4	0.03549	92	0.5108	0.997	0.3738	Symbiodinium microadriaticum	AcOrf-114 peptide
NC_001623.1_NP_054144.1	AF-A0A2Z6IB57-F1-model_v4	0.1137	91	0.6111	0.997	0.3899	Sutterella megalosphaeroides	AcOrf-114 peptide
NC_001623.1_NP_054144.1	AF-A0A251UHE6-F1-model_v4	0.03049	91	0.5115	0.997	0.3568	Helianthus annuus	AcOrf-114 peptide
NC_001623.1_NP_054144.1	AF-A0A0N5AHB5-F1-model_v4	0.03374	91	0.5335	0.997	0.3478	Syphacia muris	AcOrf-114 peptide
NC_001623.1_NP_054144.1	AF-A0A3L7J7P5-F1-model_v4	0.0977	90	0.6146	0.996	0.3676	Mycetocola zhadangensis	AcOrf-114 peptide
NC_001623.1_NP_054144.1	AF-A0A7K0C736-F1-model_v4	0.06194	90	0.5492	0.996	0.3741	Actinomadura macrotermitis	AcOrf-114 peptide
NC_001623.1_NP_054144.1	AF-A0A0B2VFE5-F1-model_v4	0.02755	89	0.4958	0.996	0.3465	Toxocara canis	AcOrf-114 peptide
NC_001623.1_NP_054144.1	AF-A0A379BY65-F1-model_v4	0.06516	87	0.5797	0.994	0.3371	Nocardia brasiliensis	AcOrf-114 peptide
NC_001623.1_NP_054144.1	AF-A0A2R6WGN0-F1-model_v4	0.03927	87	0.5033	0.994	0.3451	Marchantia polymorpha	AcOrf-114 peptide
NC_001623.1_NP_054144.1	AF-A0A673TW30-F1-model_v4	0.07211	87	0.554	0.994	0.3554	Suricata suricatta	AcOrf-114 peptide
NC_001623.1_NP_054144.1	AF-A0A6P9BFL2-F1-model_v4	0.05889	87	0.548	0.994	0.3421	Pantherophis guttatus	AcOrf-114 peptide
NC_001623.1_NP_054144.1	AF-A0A812SZA4-F1-model_v4	0.002823	87	0.3335	0.994	0.3372	Symbiodinium sp. KB8	AcOrf-114 peptide
NC_001623.1_NP_054144.1	AF-A0A821HRD0-F1-model_v4	0.07979	86	0.5342	0.993	0.3716	Rotaria socialis	AcOrf-114 peptide
NC_001623.1_NP_054144.1	AF-A0A6Q2X1B6-F1-model_v4	0.08393	86	0.5425	0.993	0.3636	Esox lucius	AcOrf-114 peptide
NC_001623.1_NP_054144.1	AF-S8D1L6-F1-model_v4	0.2196	85	0.5725	0.992	0.413	Genlisea aurea	AcOrf-114 peptide
NC_001623.1_NP_054144.1	AF-A0A7V8NHE7-F1-model_v4	0.1137	84	0.5621	0.991	0.3598	Streptomyces sp. AJS327	AcOrf-114 peptide
NC_001623.1_NP_054144.1	AF-A0A7N4NVX7-F1-model_v4	0.08393	84	0.5288	0.991	0.3577	Sarcophilus harrisii	AcOrf-114 peptide
NC_001623.1_NP_054144.1	AF-A0A667GNG5-F1-model_v4	0.06194	84	0.5181	0.991	0.3412	Lynx canadensis	AcOrf-114 peptide
NC_001623.1_NP_054144.1	AF-A0A6J5ISX5-F1-model_v4	0.1137	83	0.5343	0.99	0.3682	Burkholderia aenigmatica	AcOrf-114 peptide
NC_001623.1_NP_054144.1	AF-A0A016VKU1-F1-model_v4	0.08393	82	0.5323	0.988	0.3415	Ancylostoma ceylanicum	AcOrf-114 peptide
NC_001623.1_NP_054144.1	AF-A0A402FPV1-F1-model_v4	0.1621	82	0.563	0.988	0.3695	Paroedura picta	AcOrf-114 peptide
NC_001623.1_NP_054144.1	AF-A0A210PIP9-F1-model_v4	0.1137	82	0.5182	0.988	0.3684	Mizuhopecten yessoensis	AcOrf-114 peptide
NC_001623.1_NP_054144.1	AF-A0A345SX16-F1-model_v4	0.09288	80	0.5066	0.984	0.3493	Peterkaempfera bronchialis	AcOrf-114 peptide
NC_001623.1_NP_054144.1	AF-A0A7J7E269-F1-model_v4	0.3131	80	0.5727	0.984	0.3982	Tripterygium wilfordii	AcOrf-114 peptide
NC_001623.1_NP_054144.1	AF-A0A821YWH3-F1-model_v4	0.06516	80	0.4527	0.984	0.3653	Rotaria sp. Silwood1	AcOrf-114 peptide
NC_001623.1_NP_054144.1	AF-A0A4Y7IUT5-F1-model_v4	0.1393	80	0.5123	0.984	0.3732	Papaver somniferum	AcOrf-114 peptide
NC_001623.1_NP_054144.1	AF-A0A810LKG3-F1-model_v4	0.08393	79	0.498	0.981	0.3393	Actinoplanes ianthinogenes	AcOrf-114 peptide
NC_001623.1_NP_054144.1	AF-C0PAT3-F1-model_v4	0.1258	79	0.4824	0.981	0.3763	Zea mays	AcOrf-114 peptide
NC_001623.1_NP_054144.1	AF-A0A817YU47-F1-model_v4	0.1465	79	0.5182	0.981	0.3667	Rotaria sp. Silwood2	AcOrf-114 peptide
NC_001623.1_NP_054144.1	AF-A0A2D4HF05-F1-model_v4	0.3131	79	0.6019	0.981	0.3765	Micrurus lemniscatus lemniscatus	AcOrf-114 peptide
NC_001623.1_NP_054144.1	AF-A0A816PN65-F1-model_v4	0.2431	79	0.5571	0.981	0.3805	Rotaria magnacalcarata	AcOrf-114 peptide
NC_001623.1_NP_054144.1	AF-A0A2K5S7G4-F1-model_v4	0.2311	78	0.551	0.978	0.3672	Cebus imitator	AcOrf-114 peptide
NC_001623.1_NP_054144.1	AF-A0A0D2VW30-F1-model_v4	0.2088	78	0.5308	0.978	0.3737	Capsaspora owczarzaki ATCC 30864	AcOrf-114 peptide
NC_001623.1_NP_054144.1	AF-A0A1X7TLM6-F1-model_v4	0.06194	77	0.4424	0.975	0.3408	Amphimedon queenslandica	AcOrf-114 peptide
NC_001623.1_NP_054144.1	AF-A0A3L6VIA3-F1-model_v4	0.06516	77	0.4661	0.975	0.3222	Aphanomyces astaci	AcOrf-114 peptide
NC_001623.1_NP_054144.1	AF-A0A7I8IEF3-F1-model_v4	0.01747	77	0.3755	0.975	0.3158	Spirodela intermedia	AcOrf-114 peptide
NC_001623.1_NP_054144.1	AF-A0A7M5VG44-F1-model_v4	0.1621	77	0.527	0.975	0.349	Clytia hemisphaerica	AcOrf-114 peptide
NC_001623.1_NP_054144.1	AF-A0A1I5AAJ0-F1-model_v4	0.1393	76	0.5117	0.971	0.3346	Mycetocola miduiensis	AcOrf-114 peptide
NC_001623.1_NP_054144.1	AF-A0A093IB20-F1-model_v4	0.05889	76	0.4302	0.971	0.3355	Fulmarus glacialis	AcOrf-114 peptide
NC_001623.1_NP_054144.1	AF-A0A7J8BD46-F1-model_v4	0.2196	76	0.5311	0.971	0.3624	Rousettus aegyptiacus	AcOrf-114 peptide
NC_001623.1_NP_054144.1	AF-A0A2G8JQD8-F1-model_v4	0.08829	76	0.4486	0.971	0.3477	Apostichopus japonicus	AcOrf-114 peptide
NC_001623.1_NP_054144.1	AF-A0A1B6M7F4-F1-model_v4	0.06194	76	0.4218	0.971	0.3478	Graphocephala atropunctata	AcOrf-114 peptide
NC_001623.1_NP_054144.1	AF-A0A5N4CQV8-F1-model_v4	0.1621	76	0.5362	0.971	0.3295	Camelus dromedarius	AcOrf-114 peptide
NC_001623.1_NP_054144.1	AF-A0A0F7VV23-F1-model_v4	0.269	75	0.5588	0.967	0.3464	Streptomyces leeuwenhoekii	AcOrf-114 peptide
NC_001623.1_NP_054144.1	AF-A0A7J7SW19-F1-model_v4	0.3834	75	0.5681	0.967	0.371	Rhinolophus ferrumequinum	AcOrf-114 peptide
NC_001623.1_NP_054144.1	AF-A0A6P3TPQ9-F1-model_v4	0.1393	75	0.5097	0.967	0.334	Ovis aries	AcOrf-114 peptide
NC_001623.1_NP_054144.1	AF-A0A5A7PEU6-F1-model_v4	0.07585	75	0.4643	0.967	0.3215	Striga asiatica	AcOrf-114 peptide
NC_001623.1_NP_054144.1	AF-A0A5N6LL02-F1-model_v4	0.6361	74	0.5759	0.961	0.4069	Mikania micrantha	AcOrf-114 peptide
NC_001623.1_NP_054144.1	AF-A0A6P8BRE0-F1-model_v4	0.5194	74	0.565	0.961	0.3916	Punica granatum	AcOrf-114 peptide
NC_001623.1_NP_054144.1	AF-A0A4W4EES1-F1-model_v4	0.1621	74	0.5095	0.961	0.329	Electrophorus electricus	AcOrf-114 peptide
NC_001623.1_NP_054144.1	AF-A0A674BZY9-F1-model_v4	0.3464	74	0.5598	0.961	0.3642	Salmo trutta	AcOrf-114 peptide
NC_001623.1_NP_054144.1	AF-A0A356TEL7-F1-model_v4	0.6361	73	0.6042	0.956	0.3732	Myxococcales bacterium	AcOrf-114 peptide
NC_001623.1_NP_054144.1	AF-A0A6B0S6V3-F1-model_v4	0.1258	73	0.5001	0.956	0.3125	Bos mutus	AcOrf-114 peptide
NC_001623.1_NP_054144.1	AF-A0A355ZZX9-F1-model_v4	0.5748	72	0.5729	0.949	0.3786	Sutterella sp.	AcOrf-114 peptide
NC_001623.1_NP_054144.1	AF-A0A370JWK4-F1-model_v4	0.5464	72	0.5598	0.949	0.3775	Meiothermus sp. QL-1	AcOrf-114 peptide
NC_001623.1_NP_054144.1	AF-D7T4C9-F1-model_v4	0.5748	72	0.5607	0.949	0.3862	Vitis vinifera	AcOrf-114 peptide
NC_001623.1_NP_054144.1	AF-A0A060Z1P7-F1-model_v4	0.07211	72	0.429	0.949	0.3123	Oncorhynchus mykiss	AcOrf-114 peptide
NC_001623.1_NP_054144.1	AF-A0A6A5F3T0-F1-model_v4	0.1465	72	0.4539	0.949	0.3413	Perca fluviatilis	AcOrf-114 peptide
NC_001623.1_NP_054144.1	AF-A0A0U9HIA1-F1-model_v4	0.1541	72	0.4615	0.949	0.3449	Klebsormidium nitens	AcOrf-114 peptide
NC_001623.1_NP_054144.1	AF-A0A4P6U1A6-F1-model_v4	0.6047	71	0.603	0.941	0.3572	Streptomyces seoulensis	AcOrf-114 peptide
NC_001623.1_NP_054144.1	AF-A0A4P8PP56-F1-model_v4	0.3464	71	0.5495	0.941	0.3371	Rhodococcus sp. SGAir0479	AcOrf-114 peptide
NC_001623.1_NP_054144.1	AF-A0A1U8GQ99-F1-model_v4	0.4694	71	0.5262	0.941	0.3845	Capsicum annuum	AcOrf-114 peptide
NC_001623.1_NP_054144.1	AF-A0A383V8U4-F1-model_v4	0.4462	71	0.5228	0.941	0.3764	Tetradesmus obliquus	AcOrf-114 peptide
NC_001623.1_NP_054144.1	AF-A0A6P8W4R3-F1-model_v4	0.1465	71	0.4536	0.941	0.3403	Gymnodraco acuticeps	AcOrf-114 peptide
NC_001623.1_NP_054144.1	AF-A0A813ZYR4-F1-model_v4	0.5748	71	0.5584	0.941	0.3777	Didymodactylos carnosus	AcOrf-114 peptide
NC_001623.1_NP_054144.1	AF-K7RFJ4-F1-model_v4	0.8193	70	0.6028	0.933	0.376	Thermus oshimai JL-2	AcOrf-114 peptide
NC_001623.1_NP_054144.1	AF-A0A438AWQ6-F1-model_v4	0.4938	70	0.5678	0.933	0.3439	Rhodococcus xishaensis	AcOrf-114 peptide
NC_001623.1_NP_054144.1	AF-Q01T20-F1-model_v4	0.2829	70	0.4994	0.933	0.3425	Candidatus Solibacter usitatus Ellin6076	AcOrf-114 peptide
NC_001623.1_NP_054144.1	AF-A0A0B6ZN33-F1-model_v4	0.7404	70	0.5637	0.933	0.389	Arion vulgaris	AcOrf-114 peptide
NC_001623.1_NP_054144.1	AF-A0A4Z1E718-F1-model_v4	0.3464	70	0.5025	0.933	0.3598	Serinibacter arcticus	AcOrf-114 peptide
NC_001623.1_NP_054144.1	AF-A0A507FFZ4-F1-model_v4	0.2976	70	0.4969	0.933	0.3545	Chytriomyces confervae	AcOrf-114 peptide
NC_001623.1_NP_054144.1	AF-A0A1A0Q5V8-F1-model_v4	0.5748	69	0.5564	0.923	0.3522	Mycolicibacterium setense	AcOrf-114 peptide
NC_001623.1_NP_054144.1	AF-A5BMT8-F1-model_v4	0.6361	69	0.5382	0.923	0.3796	Vitis vinifera	AcOrf-114 peptide
NC_001623.1_NP_054144.1	AF-A0A4Z2ETK1-F1-model_v4	0.5748	69	0.5532	0.923	0.3623	Liparis tanakae	AcOrf-114 peptide
NC_001623.1_NP_054144.1	AF-A0A2T7PF65-F1-model_v4	0.1541	69	0.4549	0.923	0.3245	Pomacea canaliculata	AcOrf-114 peptide
NC_001623.1_NP_054144.1	AF-A0A674C161-F1-model_v4	0.1985	69	0.4805	0.923	0.3176	Salmo trutta	AcOrf-114 peptide
NC_001623.1_NP_054144.1	AF-A0A7X3NTZ4-F1-model_v4	0.9066	68	0.5826	0.912	0.3758	Candidatus Poribacteria bacterium	AcOrf-114 peptide
NC_001623.1_NP_054144.1	AF-A0A401SF84-F1-model_v4	0.8193	68	0.5598	0.912	0.3728	Chiloscyllium punctatum	AcOrf-114 peptide
NC_001623.1_NP_054144.1	AF-A0A6Q2WZ96-F1-model_v4	0.2088	68	0.4837	0.912	0.3114	Esox lucius	AcOrf-114 peptide
NC_001623.1_NP_054144.1	AF-A0A7C1B4T3-F1-model_v4	0.8618	67	0.5754	0.9	0.3569	Deltaproteobacteria bacterium	AcOrf-114 peptide
NC_001623.1_NP_054144.1	AF-A0A078GES3-F1-model_v4	0.8193	67	0.5517	0.9	0.3693	Brassica napus	AcOrf-114 peptide
NC_001623.1_NP_054144.1	AF-A0A2K1Y3D6-F1-model_v4	0.3131	67	0.4782	0.9	0.3426	Populus trichocarpa	AcOrf-114 peptide
NC_001623.1_NP_054144.1	AF-A0A2K3NM63-F1-model_v4	0.5194	67	0.507	0.9	0.3624	Trifolium pratense	AcOrf-114 peptide
NC_001623.1_NP_054144.1	AF-A0A1X1WHJ3-F1-model_v4	0.4242	67	0.508	0.9	0.3418	Mycobacterium gordonae	AcOrf-114 peptide
NC_001623.1_NP_054144.1	AF-A0A498KMI9-F1-model_v4	1.842	67	0.5988	0.9	0.4257	Malus domestica	AcOrf-114 peptide
NC_001623.1_NP_054144.1	AF-A0A1A8UKY9-F1-model_v4	0.1465	67	0.4332	0.9	0.3116	Nothobranchius furzeri	AcOrf-114 peptide
NC_001623.1_NP_054144.1	AF-A0A671FR36-F1-model_v4	0.7788	67	0.5525	0.9	0.3648	Rhinolophus ferrumequinum	AcOrf-114 peptide
NC_001623.1_NP_054144.1	AF-A0A2I3NFE4-F1-model_v4	0.3131	67	0.5065	0.9	0.3199	Papio anubis	AcOrf-114 peptide
NC_001623.1_NP_054144.1	AF-S7MYH2-F1-model_v4	0.6691	67	0.5404	0.9	0.3551	Myotis brandtii	AcOrf-114 peptide
NC_001623.1_NP_054144.1	AF-A0A7I4XT49-F1-model_v4	0.6047	67	0.5469	0.9	0.3455	Haemonchus contortus	AcOrf-114 peptide
NC_001623.1_NP_054144.1	AF-A0A830HBY0-F1-model_v4	1.582	66	0.5865	0.887	0.4039	Pycnococcus provasolii	AcOrf-114 peptide
NC_001623.1_NP_054144.1	AF-A0A7N8XC02-F1-model_v4	0.08829	66	0.4142	0.887	0.2899	Mastacembelus armatus	AcOrf-114 peptide
NC_001623.1_NP_054144.1	AF-A0A821FR28-F1-model_v4	0.5464	65	0.5008	0.872	0.3462	Rotaria socialis	AcOrf-114 peptide
NC_001623.1_NP_054144.1	AF-A0A0D6R0D6-F1-model_v4	0.3293	65	0.4435	0.872	0.3487	Araucaria cunninghamii	AcOrf-114 peptide
NC_001623.1_NP_054144.1	AF-A0A3B4BFK4-F1-model_v4	0.1324	65	0.4158	0.872	0.3052	Periophthalmus magnuspinnatus	AcOrf-114 peptide
NC_001623.1_NP_054144.1	AF-C3YI34-F1-model_v4	0.1985	65	0.4364	0.872	0.3146	Branchiostoma floridae	AcOrf-114 peptide
NC_001623.1_NP_054144.1	AF-Q9CXF7-F1-model_v4	1.055	65	0.5612	0.872	0.3676	Mus musculus	AcOrf-114 peptide
NC_001623.1_NP_054144.1	AF-A0A6A5BS68-F1-model_v4	0.5464	65	0.4959	0.872	0.3558	Naegleria fowleri	AcOrf-114 peptide
NC_001623.1_NP_054144.1	AF-A0A4Q3JPF2-F1-model_v4	0.7788	64	0.5643	0.855	0.3275	Myxococcales bacterium	AcOrf-114 peptide
NC_001623.1_NP_054144.1	AF-A0A7Y5T495-F1-model_v4	0.7788	64	0.5488	0.855	0.3416	Bacteroidetes bacterium	AcOrf-114 peptide
NC_001623.1_NP_054144.1	AF-A0A2U1LRU0-F1-model_v4	0.8193	64	0.5241	0.855	0.3605	Artemisia annua	AcOrf-114 peptide
NC_001623.1_NP_054144.1	AF-A0A2H5QBP4-F1-model_v4	1.359	64	0.5586	0.855	0.3911	Citrus unshiu	AcOrf-114 peptide
NC_001623.1_NP_054144.1	AF-H9EYM5-F1-model_v4	0.6691	64	0.5704	0.855	0.3142	Macaca mulatta	AcOrf-114 peptide
NC_001623.1_NP_054144.1	AF-E8NDP3-F1-model_v4	0.6047	64	0.496	0.855	0.3457	Microbacterium testaceum StLB037	AcOrf-114 peptide
NC_001623.1_NP_054144.1	AF-A0A671W9I8-F1-model_v4	0.2431	64	0.4654	0.855	0.3012	Sparus aurata	AcOrf-114 peptide
NC_001623.1_NP_054144.1	AF-A0A3Q3VX27-F1-model_v4	0.2431	64	0.4621	0.855	0.3046	Mola mola	AcOrf-114 peptide
NC_001623.1_NP_054144.1	AF-A0A397CLC7-F1-model_v4	0.4242	64	0.4912	0.855	0.3251	Aphanomyces astaci	AcOrf-114 peptide
NC_001623.1_NP_054144.1	AF-A0A7M7SX25-F1-model_v4	0.7788	64	0.5209	0.855	0.3535	Strongylocentrotus purpuratus	AcOrf-114 peptide
NC_001623.1_NP_054144.1	AF-A0A2H5PNN4-F1-model_v4	0.6691	63	0.4927	0.837	0.3527	Citrus unshiu	AcOrf-114 peptide
NC_001623.1_NP_054144.1	AF-A0A6J4IBA8-F1-model_v4	0.2196	63	0.4067	0.837	0.3274	uncultured Armatimonadetes bacterium	AcOrf-114 peptide
NC_001623.1_NP_054144.1	AF-V4B066-F1-model_v4	1.055	63	0.5485	0.837	0.3502	Lottia gigantea	AcOrf-114 peptide
NC_001623.1_NP_054144.1	AF-A0A0D2WTE4-F1-model_v4	0.9537	63	0.5154	0.837	0.3719	Capsaspora owczarzaki ATCC 30864	AcOrf-114 peptide
NC_001623.1_NP_054144.1	AF-A0A162NKW7-F1-model_v4	0.3644	62	0.445	0.817	0.3237	Flavihumibacter sp. CACIAM 22H1	AcOrf-114 peptide
NC_001623.1_NP_054144.1	AF-A0A6G0SW93-F1-model_v4	0.6361	62	0.4841	0.817	0.3396	Aphis glycines	AcOrf-114 peptide
NC_001623.1_NP_054144.1	AF-A0A3Q2GW70-F1-model_v4	1.11	62	0.5431	0.817	0.3573	Equus caballus	AcOrf-114 peptide
NC_001623.1_NP_054144.1	AF-A0A661NNY0-F1-model_v4	1.43	61	0.5817	0.795	0.3459	Deltaproteobacteria bacterium	AcOrf-114 peptide
NC_001623.1_NP_054144.1	AF-A0A1R2CCK6-F1-model_v4	0.9537	61	0.5167	0.795	0.3468	Stentor coeruleus	AcOrf-114 peptide
NC_001623.1_NP_054144.1	AF-A0A1I7X4E2-F1-model_v4	0.1621	60	0.4239	0.772	0.2657	Heterorhabditis bacteriophora	AcOrf-114 peptide
NC_001623.1_NP_054144.1	AF-A0A5S9QX57-F1-model_v4	1.292	60	0.5416	0.772	0.3469	BD1-7 clade bacterium	AcOrf-114 peptide
NC_001623.1_NP_054144.1	AF-A0A7X3VJZ8-F1-model_v4	0.9066	60	0.4984	0.772	0.3425	Candidatus Poribacteria bacterium	AcOrf-114 peptide
NC_001623.1_NP_054144.1	AF-A0A428Y6B2-F1-model_v4	0.269	60	0.4175	0.772	0.299	Amycolatopsis sp. WAC 01376	AcOrf-114 peptide
NC_001623.1_NP_054144.1	AF-A0A507CC59-F1-model_v4	0.5194	60	0.4481	0.772	0.327	Synchytrium microbalum	AcOrf-114 peptide
NC_001623.1_NP_054144.1	AF-A0A5J6YRA5-F1-model_v4	0.8193	59	0.5091	0.747	0.3147	Deinococcus sp. AJ005	AcOrf-114 peptide
NC_001623.1_NP_054144.1	AF-A0A5C6DEG2-F1-model_v4	1.11	59	0.5156	0.747	0.3331	Novipirellula aureliae	AcOrf-114 peptide
NC_001623.1_NP_054144.1	AF-A0A7S0UQ37-F1-model_v4	1.665	59	0.5386	0.747	0.3641	Polytomella parva	AcOrf-114 peptide
NC_001623.1_NP_054144.1	AF-A0A6A4Q4I1-F1-model_v4	1.11	59	0.5085	0.747	0.3436	Lupinus albus	AcOrf-114 peptide
NC_001623.1_NP_054144.1	AF-A0A2P5EGR2-F1-model_v4	2.762	59	0.5714	0.747	0.3976	Trema orientale	AcOrf-114 peptide
NC_001623.1_NP_054144.1	AF-A0A5E6XKL8-F1-model_v4	1.359	59	0.5076	0.747	0.3592	Pseudomonas fluorescens	AcOrf-114 peptide
NC_001623.1_NP_054144.1	AF-A0A1A8LAQ0-F1-model_v4	0.7038	59	0.4497	0.747	0.3398	Nothobranchius pienaari	AcOrf-114 peptide
NC_001623.1_NP_054144.1	AF-A0A3D5VVB5-F1-model_v4	1.665	58	0.5458	0.72	0.3394	Micrococcales bacterium	AcOrf-114 peptide
NC_001623.1_NP_054144.1	AF-D8RR29-F1-model_v4	1.582	58	0.506	0.72	0.3608	Selaginella moellendorffii	AcOrf-114 peptide
NC_001623.1_NP_054144.1	AF-A0A1A8S0E5-F1-model_v4	0.2976	58	0.3977	0.72	0.3008	Nothobranchius rachovii	AcOrf-114 peptide
NC_001623.1_NP_054144.1	AF-A0A1V9YR91-F1-model_v4	0.7038	58	0.4057	0.72	0.3652	Achlya hypogyna	AcOrf-114 peptide
NC_001623.1_NP_054144.1	AF-A0A7N6AUA7-F1-model_v4	0.7038	58	0.4448	0.72	0.3338	Anabas testudineus	AcOrf-114 peptide
NC_001623.1_NP_054144.1	AF-R7M3L6-F1-model_v4	1.003	57	0.4699	0.692	0.3339	Clostridium sp. CAG:914	AcOrf-114 peptide
NC_001623.1_NP_054144.1	AF-A7T7W5-F1-model_v4	1.582	57	0.507	0.692	0.3478	Nematostella vectensis	AcOrf-114 peptide
NC_001623.1_NP_054144.1	AF-A0A8B6CL85-F1-model_v4	1.359	57	0.4927	0.692	0.3479	Mytilus galloprovincialis	AcOrf-114 peptide
NC_001623.1_NP_054144.1	AF-A0A1H2ZJX7-F1-model_v4	0.8618	56	0.4829	0.663	0.3047	Saccharopolyspora shandongensis	AcOrf-114 peptide
NC_001623.1_NP_054144.1	AF-A0A5E4PVN7-F1-model_v4	0.1887	56	0.3508	0.663	0.2892	Leptidea sinapis	AcOrf-114 peptide
NC_001623.1_NP_054144.1	AF-A0A671W9X4-F1-model_v4	0.4033	56	0.4154	0.663	0.2899	Sparus aurata	AcOrf-114 peptide
NC_001623.1_NP_054144.1	AF-A0A0L8GXZ6-F1-model_v4	1.003	56	0.4725	0.663	0.3198	Octopus bimaculoides	AcOrf-114 peptide
NC_001623.1_NP_054144.1	AF-A0A6G0IT82-F1-model_v4	2.762	56	0.5654	0.663	0.3657	Larimichthys crocea	AcOrf-114 peptide
NC_001623.1_NP_054144.1	AF-A0A1I1VK68-F1-model_v4	1.359	55	0.5004	0.632	0.3239	Chitinophaga sp. CF118	AcOrf-114 peptide
NC_001623.1_NP_054144.1	AF-A0A2S6IMH3-F1-model_v4	0.6691	55	0.4433	0.632	0.2919	Nonlabens xylanidelens	AcOrf-114 peptide
NC_001623.1_NP_054144.1	AF-A0A1B6MK86-F1-model_v4	0.6361	55	0.3887	0.632	0.3285	Graphocephala atropunctata	AcOrf-114 peptide
NC_001623.1_NP_054144.1	AF-A0A5E4JR25-F1-model_v4	3.742	54	0.5944	0.601	0.3581	uncultured archaeon	AcOrf-114 peptide
NC_001623.1_NP_054144.1	AF-A0A1B6M2G8-F1-model_v4	0.7404	54	0.4036	0.601	0.3241	Graphocephala atropunctata	AcOrf-114 peptide
NC_001623.1_NP_054144.1	AF-A0A522U7H6-F1-model_v4	1.582	54	0.4728	0.601	0.3351	bacterium	AcOrf-114 peptide
NC_001623.1_NP_054144.1	AF-A0A7V6C737-F1-model_v4	4.356	53	0.572	0.569	0.3655	Deltaproteobacteria bacterium	AcOrf-114 peptide
NC_001623.1_NP_054144.1	AF-A0A1A7WDL8-F1-model_v4	0.5194	53	0.3993	0.569	0.2906	Iconisemion striatum	AcOrf-114 peptide
NC_001623.1_NP_054144.1	AF-A0A067JCX9-F1-model_v4	0.3131	53	0.3146	0.569	0.32	Jatropha curcas	AcOrf-114 peptide
NC_001623.1_NP_054144.1	AF-A0A1S8VQU0-F1-model_v4	4.582	53	0.5715	0.569	0.3742	Batrachochytrium salamandrivorans	AcOrf-114 peptide
NC_001623.1_NP_054144.1	AF-A0A671WAW2-F1-model_v4	1.665	53	0.512	0.569	0.3081	Sparus aurata	AcOrf-114 peptide
NC_001623.1_NP_054144.1	AF-A0A7E6FG84-F1-model_v4	1.665	53	0.4909	0.569	0.3221	Octopus vulgaris	AcOrf-114 peptide
NC_001623.1_NP_054144.1	AF-A0A3Q2FEC1-F1-model_v4	0.5748	53	0.3982	0.569	0.2979	Cyprinodon variegatus	AcOrf-114 peptide
NC_001623.1_NP_054144.1	AF-A0A327LTA8-F1-model_v4	1.504	52	0.4444	0.537	0.3305	Roseicella frigidaeris	AcOrf-114 peptide
NC_001623.1_NP_054144.1	AF-A0A7W0UW27-F1-model_v4	1.842	51	0.4881	0.505	0.3089	Pyrinomonadaceae bacterium	AcOrf-114 peptide
NC_001623.1_NP_054144.1	AF-X5XYR4-F1-model_v4	1.228	51	0.4299	0.505	0.3083	Mesorhizobium sp. LNJC405B00	AcOrf-114 peptide
NC_001623.1_NP_054144.1	AF-A0A665TCY9-F1-model_v4	1.582	51	0.4313	0.505	0.3349	Echeneis naucrates	AcOrf-114 peptide
NC_001623.1_NP_054144.1	AF-A0A3D4ZRZ5-F1-model_v4	2.038	50	0.4478	0.473	0.3288	Oscillospiraceae bacterium	AcOrf-114 peptide
NC_001623.1_NP_054144.1	AF-A0A5J4YWZ3-F1-model_v4	1.938	50	0.4514	0.473	0.3278	Porphyridium purpureum	AcOrf-114 peptide
NC_001623.1_NP_054144.1	AF-A0A6I8NMD0-F1-model_v4	0.8618	50	0.3924	0.473	0.2949	Ornithorhynchus anatinus	AcOrf-114 peptide
NC_001623.1_NP_054144.1	AF-A0A1U6I9N9-F1-model_v4	2.373	49	0.4833	0.442	0.3042	Novosphingobium mathurense	AcOrf-114 peptide
NC_001623.1_NP_054144.1	AF-A0A556TR51-F1-model_v4	0.9066	49	0.402	0.442	0.2845	Bagarius yarrelli	AcOrf-114 peptide
NC_001623.1_NP_054144.1	AF-A0A1A8A3Q1-F1-model_v4	1.582	48	0.4157	0.411	0.3089	Nothobranchius furzeri	AcOrf-114 peptide
NC_001623.1_NP_054144.1	AF-Q7ZU90-F1-model_v4	2.625	48	0.4482	0.411	0.3259	Danio rerio	AcOrf-114 peptide
NC_001623.1_NP_054144.1	AF-A0A1E4JDK2-F1-model_v4	4.356	47	0.5326	0.382	0.3175	Sphingomonas sp. SCN 67-18	AcOrf-114 peptide
NC_001623.1_NP_054144.1	AF-A0A251RSF1-F1-model_v4	0.5194	47	0.3	0.382	0.3004	Helianthus annuus	AcOrf-114 peptide
NC_001623.1_NP_054144.1	AF-A0A258TB01-F1-model_v4	3.557	44	0.4473	0.301	0.3095	Sphingomonas sp. 28-66-16	AcOrf-114 peptide
NC_001623.1_NP_054144.1	AF-A0A0B1SVC8-F1-model_v4	0.3131	43	0.2872	0.277	0.2303	Oesophagostomum dentatum	AcOrf-114 peptide
NC_001623.1_NP_054144.1	AF-A0A1U9LJN6-F1-model_v4	6.87	42	0.4695	0.254	0.3321	Acetobacter persici	AcOrf-114 peptide
NC_001623.1_NP_054144.1	AF-A0A1I5C0W5-F1-model_v4	0.04809	41	0.1629	0.233	0.2522	Flavobacterium ummariense	AcOrf-114 peptide
NC_001623.1_NP_054144.1	AF-A0A0S2TG99-F1-model_v4	2.496	40	0.3876	0.214	0.2585	Candidatus Tenderia electrophaga	AcOrf-114 peptide
NC_001623.1_NP_054144.1	AF-A0A1S3IU14-F1-model_v4	1.168	40	0.2802	0.214	0.2879	Lingula anatina	AcOrf-114 peptide
NC_001623.1_NP_054144.1	AF-A0A402AJF3-F1-model_v4	4.141	39	0.418	0.196	0.2662	Dictyobacter kobayashii	AcOrf-114 peptide
NC_001623.1_NP_054144.1	AF-A0A2J6W230-F1-model_v4	4.141	37	0.3781	0.164	0.2666	Caldisphaera sp.	AcOrf-114 peptide
NC_001623.1_NP_054144.1	AF-A0A2D5JQB4-F1-model_v4	0.1465	37	0.1681	0.164	0.2557	Gammaproteobacteria bacterium	AcOrf-114 peptide
NC_001623.1_NP_054144.1	AF-A0A2E7CR77-F1-model_v4	0.1887	36	0.1623	0.15	0.253	Crocinitomicaceae bacterium	AcOrf-114 peptide
NC_001623.1_NP_054144.1	AF-A0A239HUS6-F1-model_v4	0.1887	36	0.1589	0.15	0.2626	Ekhidna lutea	AcOrf-114 peptide
NC_001623.1_NP_054144.1	AF-A0A7Y0FDM9-F1-model_v4	0.1887	36	0.1632	0.15	0.2591	Flavobacterium sp. SG815	AcOrf-114 peptide
NC_001623.1_NP_054144.1	AF-A0A7Y1YGL6-F1-model_v4	0.1137	36	0.1536	0.15	0.2431	Saprospiraceae bacterium	AcOrf-114 peptide
NC_001623.1_NP_054144.1	AF-A0A090W924-F1-model_v4	0.2976	35	0.1644	0.138	0.2726	Nonlabens ulvanivorans	AcOrf-114 peptide
NC_001623.1_NP_054144.1	AF-A0A517NUH8-F1-model_v4	1.43	35	0.302	0.138	0.2183	Planctomycetes bacterium K23_9	AcOrf-114 peptide
NC_001623.1_NP_054144.1	AF-A0A090Q3T9-F1-model_v4	0.2557	35	0.163	0.138	0.2666	Nonlabens ulvanivorans	AcOrf-114 peptide
NC_001623.1_NP_054144.1	AF-A0A117LX56-F1-model_v4	5.07	34	0.3378	0.126	0.2764	Clostridiales bacterium 38_11	AcOrf-114 peptide
NC_001623.1_NP_054144.1	AF-A0A6J4GYG2-F1-model_v4	0.3834	34	0.1726	0.126	0.253	Flavobacterium bizetiae	AcOrf-114 peptide
NC_001623.1_NP_054144.1	AF-A0A6M1NCP9-F1-model_v4	1.751	33	0.2937	0.116	0.2096	Sphingobacterium sp. SGG-5	AcOrf-114 peptide
NC_001623.1_NP_054144.1	AF-A0A0F9BJ69-F1-model_v4	1.003	32	0.199	0.106	0.2488	marine sediment metagenome	AcOrf-114 peptide
NC_001623.1_NP_054144.1	AF-A0A2R7JTQ4-F1-model_v4	0.3644	32	0.1621	0.106	0.2466	Flavobacterium sp. HMWF030	AcOrf-114 peptide
NC_001623.1_NP_054144.1	AF-A0A371JVV3-F1-model_v4	0.4938	32	0.1628	0.106	0.2613	Muricauda nanhaiensis	AcOrf-114 peptide
NC_001623.1_NP_054144.1	AF-A0A3N5WI54-F1-model_v4	2.038	32	0.2496	0.106	0.2504	Candidatus Latescibacteria bacterium	AcOrf-114 peptide
NC_001623.1_NP_054144.1	AF-A0A1G4V3N7-F1-model_v4	0.6361	31	0.1582	0.098	0.2564	Lachnospiraceae bacterium YSD2013	AcOrf-114 peptide
NC_001623.1_NP_054144.1	AF-A0A7L5E3P5-F1-model_v4	0.4242	31	0.1536	0.098	0.2454	Mucilaginibacter robiniae	AcOrf-114 peptide
NC_001623.1_NP_054144.1	AF-A0A6M8SLG3-F1-model_v4	0.2431	31	0.1466	0.098	0.2244	Flavobacterium sp. M31R6	AcOrf-114 peptide
NC_001623.1_NP_054144.1	AF-Q26I60-F1-model_v4	0.6361	31	0.1598	0.098	0.2612	Flavobacteria bacterium BBFL7	AcOrf-114 peptide
NC_001623.1_NP_054144.1	AF-A0A5M6CLU6-F1-model_v4	0.3293	31	0.1496	0.098	0.2417	Taibaiella lutea	AcOrf-114 peptide
NC_001623.1_NP_054144.1	AF-A0A843KFW1-F1-model_v4	2.905	30	0.2765	0.09	0.2172	Methanomassiliicoccales archaeon	AcOrf-114 peptide
NC_001623.1_NP_054144.1	AF-A0A0B8NPB6-F1-model_v4	8.85	29	0.3116	0.082	0.2725	Vibrio ishigakensis	AcOrf-114 peptide
NC_001623.1_NP_054144.1	AF-R5RT82-F1-model_v4	7.997	29	0.3333	0.082	0.2438	Firmicutes bacterium CAG:646	AcOrf-114 peptide
NC_001623.1_NP_054144.1	AF-A0A662BS13-F1-model_v4	8.85	29	0.3436	0.082	0.2416	Bacteroidetes bacterium	AcOrf-114 peptide
NC_001623.1_NP_054144.1	AF-A0A1Z8Q9V5-F1-model_v4	0.2557	29	0.1338	0.082	0.2188	Flammeovirgaceae bacterium TMED32	AcOrf-114 peptide
NC_001623.1_NP_054144.1	AF-A0A7Y3MBD6-F1-model_v4	0.4938	29	0.152	0.082	0.233	Saprospiraceae bacterium	AcOrf-114 peptide
NC_001623.1_NP_054144.1	AF-A0A2G6P0X2-F1-model_v4	1.055	29	0.1714	0.082	0.2464	Candidatus Delongbacteria bacterium	AcOrf-114 peptide
NC_001623.1_NP_054144.1	AF-A0A2N2NP25-F1-model_v4	0.6691	29	0.1586	0.082	0.238	Chloroflexi bacterium HGW-Chloroflexi-2	AcOrf-114 peptide
NC_001623.1_NP_054144.1	AF-A0A2E0SHX4-F1-model_v4	0.6047	29	0.1529	0.082	0.2352	Planctomyces sp.	AcOrf-114 peptide
NC_001623.1_NP_054144.1	AF-A0A2K4FAF6-F1-model_v4	8.85	28	0.3304	0.076	0.2436	Staphylococcus argensis	AcOrf-114 peptide
NC_001623.1_NP_054144.1	AF-A0A4P5YAA3-F1-model_v4	2.255	28	0.2397	0.076	0.2093	Planctomycetota bacterium	AcOrf-114 peptide
NC_001623.1_NP_054144.1	AF-A0A1X4N032-F1-model_v4	2.625	28	0.256	0.076	0.2034	Thalassospira sp. MCCC 1A03138	AcOrf-114 peptide
NC_001623.1_NP_054144.1	AF-A0A316X4F6-F1-model_v4	3.936	28	0.2742	0.076	0.2196	Chryseobacterium oncorhynchi	AcOrf-114 peptide
NC_001623.1_NP_054144.1	AF-A0A1B3SKV4-F1-model_v4	4.582	28	0.2659	0.076	0.2321	Spiroplasma helicoides	AcOrf-114 peptide
NC_001623.1_NP_054144.1	AF-A0A518C4C8-F1-model_v4	5.07	28	0.3064	0.076	0.2094	Bremerella volcania	AcOrf-114 peptide
NC_001623.1_NP_054144.1	AF-A0A2E2SKW6-F1-model_v4	0.9066	28	0.1485	0.076	0.2449	Cytophagaceae bacterium	AcOrf-114 peptide
NC_001623.1_NP_054144.1	AF-A0A0S8J8P4-F1-model_v4	1.168	28	0.1656	0.076	0.2441	bacterium SM23_57	AcOrf-114 peptide
NC_001623.1_NP_054144.1	AF-R5W1U1-F1-model_v4	3.215	27	0.2206	0.069	0.2364	Coprobacillus sp. CAG:605	AcOrf-114 peptide
NC_001623.1_NP_054144.1	AF-A0A7H4Q198-F1-model_v4	3.936	27	0.2685	0.069	0.2067	Paraburkholderia sp.	AcOrf-114 peptide
NC_001623.1_NP_054144.1	AF-A0A3A4PHC7-F1-model_v4	7.997	27	0.3124	0.069	0.231	Candidatus Omnitrophica bacterium	AcOrf-114 peptide
NC_001623.1_NP_054144.1	AF-A0A3R6SEP0-F1-model_v4	1.228	27	0.159	0.069	0.236	Parabacteroides sp. AF17-28	AcOrf-114 peptide
NC_001623.1_NP_054144.1	AF-F2IE27-F1-model_v4	2.373	27	0.179	0.069	0.2492	Fluviicola taffensis DSM 16823	AcOrf-114 peptide
NC_001623.1_NP_054144.1	AF-A0A6N4SSZ7-F1-model_v4	1.504	27	0.1554	0.069	0.2515	Cytophaga hutchinsonii ATCC 33406	AcOrf-114 peptide
NC_001623.1_NP_054144.1	AF-A0A842IK14-F1-model_v4	1.751	27	0.1668	0.069	0.2519	Robiginitalea sp. SC105	AcOrf-114 peptide
NC_001623.1_NP_054144.1	AF-A0A6C0IQS7-F1-model_v4	2.255	27	0.1837	0.069	0.239	viral metagenome	AcOrf-114 peptide
NC_001623.1_NP_054144.1	AF-A0A660ZHT4-F1-model_v4	1.055	27	0.1507	0.069	0.2357	Candidatus Hydrothermae bacterium	AcOrf-114 peptide
NC_001623.1_NP_054144.1	AF-A0A1M7F099-F1-model_v4	6.87	26	0.2864	0.063	0.2165	Mucilaginibacter sp. OK098	AcOrf-114 peptide
NC_001623.1_NP_054144.1	AF-A0A6N7GQP0-F1-model_v4	8.85	26	0.2623	0.063	0.2504	Micromonosporaceae bacterium	AcOrf-114 peptide
NC_001623.1_NP_054144.1	AF-A0A321L4H4-F1-model_v4	1.228	26	0.1498	0.063	0.2347	Candidatus Angelobacter sp. Gp1-AA117	AcOrf-114 peptide
NC_001623.1_NP_054144.1	AF-A0A7X8DIU6-F1-model_v4	1.938	26	0.1656	0.063	0.2435	Tissierellia bacterium	AcOrf-114 peptide
NC_001623.1_NP_054144.1	AF-A0A2A4GE82-F1-model_v4	1.003	26	0.14	0.063	0.2452	Sediminicola luteus	AcOrf-114 peptide
NC_001623.1_NP_054144.1	AF-A0A2S7TH19-F1-model_v4	2.373	26	0.1683	0.063	0.2618	Nonlabens tegetincola	AcOrf-114 peptide
NC_001623.1_NP_054144.1	AF-A0A3N5P0Q5-F1-model_v4	2.038	26	0.1495	0.063	0.2644	Chloroflexi bacterium	AcOrf-114 peptide
NC_001623.1_NP_054144.1	AF-A0A2E0MBM9-F1-model_v4	5.611	25	0.194	0.057	0.2651	Chloroflexi bacterium	AcOrf-114 peptide
NC_001623.1_NP_054144.1	AF-A0A495IWR4-F1-model_v4	1.842	25	0.1516	0.057	0.2455	Mucilaginibacter gracilis	AcOrf-114 peptide
NC_001623.1_NP_054144.1	AF-A0A5C6MDK9-F1-model_v4	2.038	25	0.1516	0.057	0.2516	Planctomyces bekefii	AcOrf-114 peptide
NC_001623.1_NP_054144.1	AF-A0A7X6PJ99-F1-model_v4	3.382	24	0.1882	0.051	0.2115	Alcaligenaceae bacterium	AcOrf-114 peptide
NC_001623.1_NP_054144.1	AF-A0A849CL57-F1-model_v4	6.209	24	0.1944	0.051	0.2588	Pasteurella multocida	AcOrf-114 peptide
NC_001623.1_NP_054144.1	AF-A0A1C6RT08-F1-model_v4	7.602	24	0.2777	0.051	0.1971	Micromonospora rhizosphaerae	AcOrf-114 peptide
NC_001623.1_NP_054144.1	AF-A0A6C0EHS2-F1-model_v4	4.582	24	0.1708	0.051	0.2696	viral metagenome	AcOrf-114 peptide
NC_001623.1_NP_054144.1	AF-G8X4L2-F1-model_v4	3.215	24	0.164	0.051	0.2418	Flavobacterium columnare ATCC 49512	AcOrf-114 peptide
NC_001623.1_NP_054144.1	AF-A0A662HHB8-F1-model_v4	7.227	23	0.1898	0.045	0.2559	Thermoprotei archaeon	AcOrf-114 peptide
NC_001623.1_NP_054144.1	AF-A0A0R1HMA5-F1-model_v4	9.793	23	0.2713	0.045	0.2083	Secundilactobacillus kimchicus JCM 15530	AcOrf-114 peptide
NC_001623.1_NP_054144.1	AF-A0A2N7B970-F1-model_v4	4.141	23	0.1582	0.045	0.2462	Siphonobacter sp. BAB-5405	AcOrf-114 peptide
NC_001623.1_NP_054144.1	AF-H1Z609-F1-model_v4	2.144	22	0.1313	0.04	0.2326	Myroides odoratus DSM 2801	AcOrf-114 peptide
NC_001623.1_NP_054144.1	AF-A0A1M7M2E7-F1-model_v4	5.334	22	0.159	0.04	0.2565	Anaerosporobacter mobilis DSM 15930	AcOrf-114 peptide
NC_001623.1_NP_054144.1	AF-F5TAZ0-F1-model_v4	5.07	22	0.1522	0.04	0.2516	Parvimonas sp. oral taxon 110 str. F0139	AcOrf-114 peptide
NC_001623.1_NP_054144.1	AF-A0A6C0E2F9-F1-model_v4	4.141	22	0.1563	0.04	0.2425	viral metagenome	AcOrf-114 peptide
NC_001623.1_NP_054144.1	AF-F0IFG8-F1-model_v4	7.227	21	0.1694	0.034	0.2393	Capnocytophaga sp. oral taxon 338 str. F0234	AcOrf-114 peptide
NC_001623.1_NP_054144.1	AF-A0A254RCR4-F1-model_v4	5.611	21	0.1623	0.034	0.2318	Fibrobacter sp. UWR2	AcOrf-114 peptide
NC_001623.1_NP_054144.1	AF-A0A7J3TBA5-F1-model_v4	6.209	21	0.1664	0.034	0.2413	Thermoplasmatales archaeon	AcOrf-114 peptide
NC_001623.1_NP_054144.1	AF-A0A5P2G0Z1-F1-model_v4	6.87	21	0.1646	0.034	0.2446	Arachidicoccus sp. B3-10	AcOrf-114 peptide
NC_001623.1_NP_054144.1	AF-A0A1H8VDG6-F1-model_v4	3.936	21	0.131	0.034	0.2575	Mucilaginibacter sp. OK283	AcOrf-114 peptide
NC_001623.1_NP_054144.1	AF-R9JN07-F1-model_v4	3.557	21	0.1287	0.034	0.2528	Lachnospiraceae bacterium A4	AcOrf-114 peptide
NC_001623.1_NP_054144.1	AF-H6L3N2-F1-model_v4	2.905	21	0.125	0.034	0.2351	Saprospira grandis str. Lewin	AcOrf-114 peptide
NC_001623.1_NP_054144.1	AF-A0A651DKX3-F1-model_v4	3.742	21	0.1333	0.034	0.2427	Gemmatimonadales bacterium	AcOrf-114 peptide
NC_001623.1_NP_054144.1	AF-E4TV36-F1-model_v4	4.82	20	0.1504	0.029	0.2249	Marivirga tractuosa DSM 4126	AcOrf-114 peptide
NC_001623.1_NP_054144.1	AF-J1QMU6-F1-model_v4	6.209	19	0.1632	0.024	0.2048	Alishewanella aestuarii B11	AcOrf-114 peptide
NC_001623.1_NP_054144.1	AF-A0A2U4F900-F1-model_v4	6.209	19	0.1383	0.024	0.2357	Brachyspira hampsonii 30446	AcOrf-114 peptide
NC_001623.1_NP_054144.1	AF-A0A816R7I1-F1-model_v4	4.82	19	0.1294	0.024	0.2368	Rotaria magnacalcarata	AcOrf-114 peptide
NC_001623.1_NP_054144.1	AF-A0A524L281-F1-model_v4	8.413	19	0.1487	0.024	0.2411	Candidatus Atribacteria bacterium	AcOrf-114 peptide
NC_001623.1_NP_054144.1	AF-A0A7X8RR44-F1-model_v4	6.209	18	0.1293	0.02	0.221	Olsenella sp. KGMB02461	AcOrf-114 peptide
NC_001623.1_NP_054144.1	AF-A0A419GPC4-F1-model_v4	5.334	18	0.1268	0.02	0.2239	Nitrospiraceae bacterium	AcOrf-114 peptide
NC_001973.1_NP_047651.1	AF-B0D7H2-F1-model_v4	0.2143	37	0.1211	0.164	0.4738	Laccaria bicolor S238N-H82	immediate early transactivator 1
NC_001973.1_NP_047651.1	AF-A0A4Y7T8E0-F1-model_v4	0.2268	36	0.1234	0.15	0.4406	Coprinellus micaceus	immediate early transactivator 1
NC_001973.1_NP_047651.1	AF-A0A812PZN5-F1-model_v4	1.403	34	0.1651	0.126	0.4727	Symbiodinium sp. CCMP2456	immediate early transactivator 1
NC_001973.1_NP_047651.1	AF-A0A232FIR3-F1-model_v4	7.312	33	0.1938	0.116	0.6441	Trichomalopsis sarcophagae	immediate early transactivator 1
NC_001973.1_NP_047651.1	AF-A0A0C9WGG5-F1-model_v4	6.164	32	0.1891	0.106	0.6107	Laccaria amethystina LaAM-08-1	immediate early transactivator 1
NC_001973.1_NP_047651.1	AF-A0CAK2-F1-model_v4	6.908	26	0.1461	0.063	0.5141	Paramecium tetraurelia	immediate early transactivator 1
NC_001973.1_NP_047651.1	AF-A0A815WZP1-F1-model_v4	8.674	25	0.1497	0.057	0.5394	Rotaria magnacalcarata	immediate early transactivator 1
NC_001973.1_NP_047651.1	AF-A0A179F6U0-F1-model_v4	4.138	25	0.1174	0.057	0.5262	Pochonia chlamydosporia 170	immediate early transactivator 1
NC_001973.1_NP_047651.1	AF-A0A813KC03-F1-model_v4	1.974	25	0.1089	0.057	0.4417	Polarella glacialis	immediate early transactivator 1
NC_001973.1_NP_047651.1	AF-A0A164KWJ5-F1-model_v4	6.908	24	0.1365	0.051	0.5046	Daphnia magna	immediate early transactivator 1
NC_001973.1_NP_047651.1	AF-A0A6L2JE50-F1-model_v4	8.194	21	0.1026	0.034	0.509	Tanacetum cinerariifolium	immediate early transactivator 1
NC_001973.1_NP_047651.1	AF-A0A3P6TD30-F1-model_v4	6.908	21	0.116	0.034	0.4267	Litomosoides sigmodontis	immediate early transactivator 1
NC_001973.1_NP_047651.1	AF-B8AHP2-F1-model_v4	6.525	20	0.09903	0.029	0.4684	Oryza sativa Indica Group	immediate early transactivator 1
NC_001973.1_NP_047651.1	AF-A0A7S0DZK6-F1-model_v4	9.721	20	0.1156	0.029	0.4433	Hanusia phi	immediate early transactivator 1
NC_001973.1_NP_047651.1	AF-A0A7S4HWV5-F1-model_v4	7.312	18	0.09796	0.02	0.4147	Vannella robusta	immediate early transactivator 1
NC_001973.1_NP_047668.1	AF-A0A1S6L087-F1-model_v4	2.724e-17	365	0.3047	1	0.657	Bombyx mori	Ld-bro-a
NC_001973.1_NP_047668.1	AF-A0A6S7G9I9-F1-model_v4	3.445e-08	350	0.8855	1	0.7176	Paramuricea clavata	Ld-bro-a
NC_001973.1_NP_047668.1	AF-A0A1B6LJZ4-F1-model_v4	9.725e-10	342	0.6707	1	0.6867	Graphocephala atropunctata	Ld-bro-a
NC_001973.1_NP_047668.1	AF-A0A6S7FGQ9-F1-model_v4	4.072e-08	342	0.8561	1	0.7171	Paramuricea clavata	Ld-bro-a
NC_001973.1_NP_047668.1	AF-A0A7D9JFN6-F1-model_v4	1.765e-08	338	0.8015	1	0.6979	Paramuricea clavata	Ld-bro-a
NC_001973.1_NP_047668.1	AF-A0A7D9J2I0-F1-model_v4	2.205e-08	330	0.7854	1	0.6916	Paramuricea clavata	Ld-bro-a
NC_001973.1_NP_047668.1	AF-A0A7D9J7M1-F1-model_v4	5.689e-08	318	0.7934	1	0.6879	Paramuricea clavata	Ld-bro-a
NC_001973.1_NP_047668.1	AF-A0A6S7HM29-F1-model_v4	1.174e-07	317	0.8158	1	0.7077	Paramuricea clavata	Ld-bro-a
NC_001973.1_NP_047668.1	AF-A0A7D9EKN8-F1-model_v4	3.386e-07	316	0.8458	1	0.7421	Paramuricea clavata	Ld-bro-a
NC_001973.1_NP_047668.1	AF-A0A7D9EF95-F1-model_v4	3.445e-08	313	0.7584	1	0.6707	Paramuricea clavata	Ld-bro-a
NC_001973.1_NP_047668.1	AF-A0A7D9IKI6-F1-model_v4	1.834e-07	308	0.8224	1	0.6905	Paramuricea clavata	Ld-bro-a
NC_001973.1_NP_047668.1	AF-A0A6S7H5G7-F1-model_v4	4.552e-08	301	0.7209	1	0.6659	Paramuricea clavata	Ld-bro-a
NC_001973.1_NP_047668.1	AF-A0A7D9J3Y0-F1-model_v4	7.11e-08	296	0.7219	1	0.6693	Paramuricea clavata	Ld-bro-a
NC_001973.1_NP_047668.1	AF-A0A7D9JXP8-F1-model_v4	2.864e-07	289	0.7459	1	0.6972	Paramuricea clavata	Ld-bro-a
NC_001973.1_NP_047668.1	AF-A0A7D9KE61-F1-model_v4	1.313e-07	288	0.7113	1	0.6763	Paramuricea clavata	Ld-bro-a
NC_001973.1_NP_047668.1	AF-A0A7D9I032-F1-model_v4	8.404e-08	287	0.6945	1	0.6608	Paramuricea clavata	Ld-bro-a
NC_001973.1_NP_047668.1	AF-A0A7D9ISW8-F1-model_v4	4.231e-07	282	0.756	1	0.6743	Paramuricea clavata	Ld-bro-a
NC_001973.1_NP_047668.1	AF-A0A2S2P650-F1-model_v4	4.516e-14	279	0.2871	1	0.5813	Schizaphis graminum	Ld-bro-a
NC_001973.1_NP_047668.1	AF-A0A1B6JEL2-F1-model_v4	8.404e-08	270	0.6237	1	0.6534	Homalodisca liturata	Ld-bro-a
NC_001973.1_NP_047668.1	AF-A0A7D9KEQ3-F1-model_v4	8.733e-07	263	0.7182	1	0.664	Paramuricea clavata	Ld-bro-a
NC_001973.1_NP_047668.1	AF-A0A316R4W1-F1-model_v4	6.12e-09	261	0.5224	1	0.5896	Flavobacteriales bacterium	Ld-bro-a
NC_001973.1_NP_047668.1	AF-A0A6S7K3M5-F1-model_v4	6.36e-08	259	0.6041	1	0.6071	Paramuricea clavata	Ld-bro-a
NC_001973.1_NP_047668.1	AF-A0A6S7H0Z3-F1-model_v4	5.474e-09	252	0.3991	1	0.7131	Paramuricea clavata	Ld-bro-a
NC_001973.1_NP_047668.1	AF-X1WNN0-F1-model_v4	4.794e-11	250	0.3063	1	0.6571	Acyrthosiphon pisum	Ld-bro-a
NC_001973.1_NP_047668.1	AF-A0A7D9K3Q1-F1-model_v4	3.328e-06	248	0.7216	1	0.6693	Paramuricea clavata	Ld-bro-a
NC_001973.1_NP_047668.1	AF-J9LRJ1-F1-model_v4	6.251e-07	246	0.6255	1	0.6432	Acyrthosiphon pisum	Ld-bro-a
NC_001973.1_NP_047668.1	AF-A0A3N9WEN4-F1-model_v4	5.069e-11	244	0.3374	1	0.5706	Geobacter sp.	Ld-bro-a
NC_001973.1_NP_047668.1	AF-A0A7D9JUB0-F1-model_v4	5.474e-09	239	0.3924	1	0.6537	Paramuricea clavata	Ld-bro-a
NC_001973.1_NP_047668.1	AF-A0A7D9JL84-F1-model_v4	2.214e-05	238	0.7989	1	0.6793	Paramuricea clavata	Ld-bro-a
NC_001973.1_NP_047668.1	AF-A0A2W4TI99-F1-model_v4	8.26e-07	236	0.6532	1	0.5825	Candidatus Methylumidiphilus alinenensis	Ld-bro-a
NC_001973.1_NP_047668.1	AF-A0A7D9LS76-F1-model_v4	3.72e-06	236	0.6757	1	0.6537	Paramuricea clavata	Ld-bro-a
NC_001973.1_NP_047668.1	AF-A0A6S7G3I6-F1-model_v4	1.069e-08	235	0.3871	1	0.6753	Paramuricea clavata	Ld-bro-a
NC_001973.1_NP_047668.1	AF-A0A7D9IE66-F1-model_v4	3.851e-08	234	0.4495	1	0.6389	Paramuricea clavata	Ld-bro-a
NC_001973.1_NP_047668.1	AF-A0A7D9KY74-F1-model_v4	3.081e-08	234	0.4115	1	0.6869	Paramuricea clavata	Ld-bro-a
NC_001973.1_NP_047668.1	AF-A0A821UI83-F1-model_v4	2.382e-06	232	0.6595	1	0.6182	Pieris macdunnoughi	Ld-bro-a
NC_001973.1_NP_047668.1	AF-A0A373J9L7-F1-model_v4	1.64e-07	230	0.5209	1	0.5986	Firmicutes bacterium AM10-47	Ld-bro-a
NC_001973.1_NP_047668.1	AF-A0A7D9EWB3-F1-model_v4	1.866e-08	229	0.3857	1	0.6739	Paramuricea clavata	Ld-bro-a
NC_001973.1_NP_047668.1	AF-A0A6S7JYE9-F1-model_v4	1.13e-08	229	0.3837	1	0.6492	Paramuricea clavata	Ld-bro-a
NC_001973.1_NP_047668.1	AF-A0A7D9HPZ1-F1-model_v4	3.386e-07	226	0.4714	1	0.6816	Paramuricea clavata	Ld-bro-a
NC_001973.1_NP_047668.1	AF-A0A7D9EVT3-F1-model_v4	9.395e-08	216	0.3715	1	0.7064	Paramuricea clavata	Ld-bro-a
NC_001973.1_NP_047668.1	AF-A0A6S7GUD4-F1-model_v4	9.395e-08	214	0.3957	1	0.6525	Paramuricea clavata	Ld-bro-a
NC_001973.1_NP_047668.1	AF-A0A6S7HY01-F1-model_v4	4.305e-08	213	0.3589	1	0.6688	Paramuricea clavata	Ld-bro-a
NC_001973.1_NP_047668.1	AF-T4W113-F1-model_v4	4.002e-07	213	0.4944	1	0.5857	Paraclostridium bifermentans ATCC 19299	Ld-bro-a
NC_001973.1_NP_047668.1	AF-A0A1B6MQP3-F1-model_v4	4.916e-06	212	0.5939	1	0.6194	Graphocephala atropunctata	Ld-bro-a
NC_001973.1_NP_047668.1	AF-A0A3A6E7Y6-F1-model_v4	2.292e-07	208	0.3938	1	0.6687	Faecalibacterium sp. AM43-5AT	Ld-bro-a
NC_001973.1_NP_047668.1	AF-A0A250VJ77-F1-model_v4	7.812e-07	207	0.4183	1	0.7013	Streptomyces olivochromogenes	Ld-bro-a
NC_001973.1_NP_047668.1	AF-A0A6I2AFH1-F1-model_v4	1.032e-06	206	0.4686	1	0.6313	Acinetobacter baumannii	Ld-bro-a
NC_001973.1_NP_047668.1	AF-A0A7D9HH64-F1-model_v4	1.551e-07	205	0.3791	1	0.6535	Paramuricea clavata	Ld-bro-a
NC_001973.1_NP_047668.1	AF-A0A7D9LHT5-F1-model_v4	1.467e-07	204	0.4069	1	0.6023	Paramuricea clavata	Ld-bro-a
NC_001973.1_NP_047668.1	AF-A0A6S7HXQ6-F1-model_v4	1.906e-06	200	0.4187	1	0.7054	Paramuricea clavata	Ld-bro-a
NC_001973.1_NP_047668.1	AF-S5JA48-F1-model_v4	1.069e-08	200	0.3577	1	0.5273	Vibrio parahaemolyticus O1:Kuk str. FDA_R31	Ld-bro-a
NC_001973.1_NP_047668.1	AF-C8VXR4-F1-model_v4	4.159e-06	200	0.5117	1	0.6281	Desulfofarcimen acetoxidans DSM 771	Ld-bro-a
NC_001973.1_NP_047668.1	AF-A0A7D9J5C3-F1-model_v4	0.0001393	198	0.7268	1	0.6404	Paramuricea clavata	Ld-bro-a
NC_001973.1_NP_047668.1	AF-A0A349YI84-F1-model_v4	5.089e-08	196	0.3478	1	0.595	Lachnospiraceae bacterium	Ld-bro-a
NC_001973.1_NP_047668.1	AF-G4E7U1-F1-model_v4	3.202e-07	192	0.3925	1	0.5895	Thiorhodospira sibirica ATCC 700588	Ld-bro-a
NC_001973.1_NP_047668.1	AF-A0A433SH74-F1-model_v4	1.418e-05	192	0.5925	1	0.5656	Saezia sanguinis	Ld-bro-a
NC_001973.1_NP_047668.1	AF-A0A395XDK3-F1-model_v4	4.143e-09	192	0.3288	1	0.4944	Bifidobacterium pseudolongum	Ld-bro-a
NC_001973.1_NP_047668.1	AF-A0A6S7FHC8-F1-model_v4	2.015e-06	191	0.4606	1	0.5918	Paramuricea clavata	Ld-bro-a
NC_001973.1_NP_047668.1	AF-A0A6C0E2K0-F1-model_v4	1.795e-09	190	0.2743	1	0.5417	viral metagenome	Ld-bro-a
NC_001973.1_NP_047668.1	AF-A0A3S4XAP4-F1-model_v4	2.214e-05	189	0.5313	1	0.6413	Serratia rubidaea	Ld-bro-a
NC_001973.1_NP_047668.1	AF-A0A521ZXM9-F1-model_v4	1.263e-08	188	0.3358	1	0.5053	Rhodospirillaceae bacterium	Ld-bro-a
NC_001973.1_NP_047668.1	AF-A0A4U7JKE0-F1-model_v4	2.382e-06	187	0.4642	1	0.5743	Ruminiclostridium herbifermentans	Ld-bro-a
NC_001973.1_NP_047668.1	AF-A0A010ZIH9-F1-model_v4	2.382e-06	186	0.4543	1	0.5774	Cloacibacillus evryensis DSM 19522	Ld-bro-a
NC_001973.1_NP_047668.1	AF-A0A5B6P062-F1-model_v4	1.499e-05	185	0.5839	1	0.5365	Akkermansia muciniphila	Ld-bro-a
NC_001973.1_NP_047668.1	AF-A0A415VBX9-F1-model_v4	1.341e-05	185	0.4242	1	0.729	Prevotella sp. AM23-5	Ld-bro-a
NC_001973.1_NP_047668.1	AF-A0A2D9EKQ5-F1-model_v4	5.591e-07	183	0.3723	1	0.594	Pusillimonas sp. (ex Stolz et al. 2005)	Ld-bro-a
NC_001973.1_NP_047668.1	AF-A0A3R6IK22-F1-model_v4	3.72e-06	182	0.3919	1	0.6683	Prevotella copri	Ld-bro-a
NC_001973.1_NP_047668.1	AF-I0RPB5-F1-model_v4	9.596e-06	180	0.5196	1	0.5484	Mycobacterium xenopi RIVM700367	Ld-bro-a
NC_001973.1_NP_047668.1	AF-K1RJS4-F1-model_v4	1.335e-08	179	0.3115	1	0.4967	human gut metagenome	Ld-bro-a
NC_001973.1_NP_047668.1	AF-A0A385YTM6-F1-model_v4	8.118e-06	178	0.4258	1	0.6398	Paenisporosarcina cavernae	Ld-bro-a
NC_001973.1_NP_047668.1	AF-A0A834XHQ9-F1-model_v4	1.195e-08	178	0.2887	1	0.5225	Aphidius gifuensis	Ld-bro-a
NC_001973.1_NP_047668.1	AF-A0A2N3ULS6-F1-model_v4	8.584e-06	177	0.4095	1	0.6628	Streptomyces sp. GP55	Ld-bro-a
NC_001973.1_NP_047668.1	AF-Q6D4T2-F1-model_v4	6.385e-05	176	0.5652	1	0.5909	Pectobacterium atrosepticum SCRI1043	Ld-bro-a
NC_001973.1_NP_047668.1	AF-A0A1I3P7N9-F1-model_v4	2.332e-08	176	0.2903	1	0.5351	Terrisporobacter glycolicus	Ld-bro-a
NC_001973.1_NP_047668.1	AF-A0A1G5YJ39-F1-model_v4	2.094e-05	175	0.4695	1	0.6227	Pseudomonas sp. NFPP33	Ld-bro-a
NC_001973.1_NP_047668.1	AF-A0A6C0E1E9-F1-model_v4	4.813e-08	175	0.2647	1	0.621	viral metagenome	Ld-bro-a
NC_001973.1_NP_047668.1	AF-A0A7D9JDJ4-F1-model_v4	2.663e-06	173	0.349	1	0.6617	Paramuricea clavata	Ld-bro-a
NC_001973.1_NP_047668.1	AF-A0A6N0LXT7-F1-model_v4	6.868e-06	172	0.412	1	0.6092	Nostoc sp. TCL240-02	Ld-bro-a
NC_001973.1_NP_047668.1	AF-A0A4R3BEF5-F1-model_v4	1.29e-06	171	0.3574	1	0.588	Streptomyces sp. BK205	Ld-bro-a
NC_001973.1_NP_047668.1	AF-D1PGP4-F1-model_v4	2.709e-07	171	0.3102	1	0.5838	Prevotella copri DSM 18205	Ld-bro-a
NC_001973.1_NP_047668.1	AF-A0A6S7FT14-F1-model_v4	3.72e-06	170	0.3523	1	0.6533	Paramuricea clavata	Ld-bro-a
NC_001973.1_NP_047668.1	AF-A0A821XPL2-F1-model_v4	1.442e-06	169	0.3664	1	0.5654	Pieris macdunnoughi	Ld-bro-a
NC_001973.1_NP_047668.1	AF-A0A1I6T437-F1-model_v4	4.159e-06	169	0.3989	1	0.5778	Streptomyces harbinensis	Ld-bro-a
NC_001973.1_NP_047668.1	AF-A0A6C0CPD9-F1-model_v4	3.081e-08	169	0.2662	1	0.5541	viral metagenome	Ld-bro-a
NC_001973.1_NP_047668.1	AF-A0A1Q6FIC0-F1-model_v4	2.05e-07	168	0.3067	1	0.5591	Bacteroidales bacterium 43_36	Ld-bro-a
NC_001973.1_NP_047668.1	AF-B7J821-F1-model_v4	1.199e-05	168	0.4966	1	0.5114	Acidithiobacillus ferrooxidans ATCC 23270	Ld-bro-a
NC_001973.1_NP_047668.1	AF-A0A6C0EE58-F1-model_v4	3.147e-06	168	0.3678	1	0.5994	viral metagenome	Ld-bro-a
NC_001973.1_NP_047668.1	AF-A0A7U9RTQ2-F1-model_v4	2.214e-05	167	0.4754	1	0.5625	Lachnospiraceae bacterium	Ld-bro-a
NC_001973.1_NP_047668.1	AF-A0A7D9I959-F1-model_v4	6.751e-05	167	0.5549	1	0.5482	Paramuricea clavata	Ld-bro-a
NC_001973.1_NP_047668.1	AF-A0A6C0C8U7-F1-model_v4	6.724e-08	167	0.2667	1	0.5756	viral metagenome	Ld-bro-a
NC_001973.1_NP_047668.1	AF-A0A049DR96-F1-model_v4	3.866e-05	166	0.4972	1	0.5633	Mycobacterium avium XTB13-223	Ld-bro-a
NC_001973.1_NP_047668.1	AF-A0A4Y2LY18-F1-model_v4	5.912e-07	166	0.3352	1	0.5455	Araneus ventricosus	Ld-bro-a
NC_001973.1_NP_047668.1	AF-A0A415ZGD8-F1-model_v4	5.811e-06	165	0.3935	1	0.5715	Clostridium sp. AF50-3	Ld-bro-a
NC_001973.1_NP_047668.1	AF-F0QZX8-F1-model_v4	2.926e-05	162	0.4629	1	0.559	Phocaeicola salanitronis DSM 18170	Ld-bro-a
NC_001973.1_NP_047668.1	AF-A0A7W7RYS8-F1-model_v4	2.926e-05	162	0.4256	1	0.6106	Streptosporangium album	Ld-bro-a
NC_001973.1_NP_047668.1	AF-A0A4U0SNT7-F1-model_v4	6.251e-07	161	0.2927	1	0.5916	Actinacidiphila oryziradicis	Ld-bro-a
NC_001973.1_NP_047668.1	AF-A0A6C0C9D6-F1-model_v4	9.763e-07	161	0.2844	1	0.634	viral metagenome	Ld-bro-a
NC_001973.1_NP_047668.1	AF-A0A1Y3XDS9-F1-model_v4	4.832e-05	160	0.4349	1	0.6148	Gemmiger sp. An50	Ld-bro-a
NC_001973.1_NP_047668.1	AF-A0A261S327-F1-model_v4	1.772e-05	156	0.3992	1	0.5729	Bordetella genomosp. 10	Ld-bro-a
NC_001973.1_NP_047668.1	AF-A0A6C0AD22-F1-model_v4	4.231e-07	156	0.2818	1	0.555	viral metagenome	Ld-bro-a
NC_001973.1_NP_047668.1	AF-A0A0J7JVM2-F1-model_v4	0.0006635	155	0.4689	1	0.7467	Lasius niger	Ld-bro-a
NC_001973.1_NP_047668.1	AF-A0A0L8NS94-F1-model_v4	3.519e-06	155	0.3551	1	0.5327	Streptomyces griseoflavus	Ld-bro-a
NC_001973.1_NP_047668.1	AF-A0A1Y4TJS8-F1-model_v4	6.385e-05	153	0.3702	1	0.6865	Gemmiger sp. An120	Ld-bro-a
NC_001973.1_NP_047668.1	AF-A0A117QGL2-F1-model_v4	2.663e-06	152	0.2929	1	0.6088	Streptomyces corchorusii	Ld-bro-a
NC_001973.1_NP_047668.1	AF-A0A317RSY5-F1-model_v4	7.812e-07	150	0.2982	1	0.5184	Eubacterium limosum	Ld-bro-a
NC_001973.1_NP_047668.1	AF-A0A2U2Z4L0-F1-model_v4	2.815e-06	150	0.2957	1	0.5883	Streptomyces sp. NWU339	Ld-bro-a
NC_001973.1_NP_047668.1	AF-A0A4P6DT46-F1-model_v4	2.015e-06	148	0.328	1	0.4978	Bifidobacterium pullorum subsp. gallinarum	Ld-bro-a
NC_001973.1_NP_047668.1	AF-A0A5C8BDG6-F1-model_v4	1.906e-06	148	0.2983	1	0.5441	Neisseriales bacterium	Ld-bro-a
NC_001973.1_NP_047668.1	AF-R6Q0P0-F1-model_v4	9.234e-07	147	0.276	1	0.5412	Prevotella sp. CAG:386	Ld-bro-a
NC_001973.1_NP_047668.1	AF-A0A7K1M1D0-F1-model_v4	2.518e-06	147	0.2796	1	0.5877	Prevotella copri	Ld-bro-a
NC_001973.1_NP_047668.1	AF-A0A1I2Q6E5-F1-model_v4	2.663e-06	146	0.2755	1	0.5952	Streptomyces mirabilis	Ld-bro-a
NC_001973.1_NP_047668.1	AF-A0A5J4U859-F1-model_v4	0.0006635	145	0.5181	1	0.5936	Streblomastix strix	Ld-bro-a
NC_001973.1_NP_047668.1	AF-E0ULX5-F1-model_v4	1.134e-05	142	0.32	1	0.5597	Gloeothece verrucosa PCC 7822	Ld-bro-a
NC_001973.1_NP_047668.1	AF-A0A419G232-F1-model_v4	9.076e-06	142	0.3194	1	0.5499	Peptococcaceae bacterium	Ld-bro-a
NC_001973.1_NP_047668.1	AF-A0A6C0CSM2-F1-model_v4	1.134e-05	142	0.2983	1	0.6024	viral metagenome	Ld-bro-a
NC_001973.1_NP_047668.1	AF-A0A6C0CTJ1-F1-model_v4	8.118e-06	140	0.2985	1	0.5653	viral metagenome	Ld-bro-a
NC_001973.1_NP_047668.1	AF-A0A229H9S2-F1-model_v4	9.076e-06	139	0.2849	1	0.5875	Streptomyces sp. NBS 14/10	Ld-bro-a
NC_001973.1_NP_047668.1	AF-X1WYI2-F1-model_v4	0.0001393	138	0.376	1	0.6042	Acyrthosiphon pisum	Ld-bro-a
NC_001973.1_NP_047668.1	AF-A0A6G1VK46-F1-model_v4	1.091e-06	138	0.2558	1	0.5214	Prevotella copri	Ld-bro-a
NC_001973.1_NP_047668.1	AF-A0A7X7H7S4-F1-model_v4	0.0001054	137	0.4643	1	0.4675	Bacteroidales bacterium	Ld-bro-a
NC_001973.1_NP_047668.1	AF-A0A1I3WM45-F1-model_v4	3.271e-05	137	0.3474	1	0.5445	Xenorhabdus mauleonii	Ld-bro-a
NC_001973.1_NP_047668.1	AF-A0A367E7H1-F1-model_v4	9.076e-06	135	0.2935	1	0.545	Streptomyces diacarni	Ld-bro-a
NC_001973.1_NP_047668.1	AF-A0A3E4YLP4-F1-model_v4	5.109e-05	133	0.3081	1	0.6098	[Eubacterium] rectale	Ld-bro-a
NC_001973.1_NP_047668.1	AF-R5GAQ7-F1-model_v4	4.159e-06	132	0.2531	1	0.5559	Clostridium sp. CAG:81	Ld-bro-a
NC_001973.1_NP_047668.1	AF-A0A286EYR2-F1-model_v4	5.198e-06	132	0.2637	1	0.5452	Streptomyces sp. 1222.2	Ld-bro-a
NC_001973.1_NP_047668.1	AF-A0A373BT85-F1-model_v4	3.72e-06	130	0.3114	1	0.4286	Clostridiaceae bacterium AF02-42	Ld-bro-a
NC_001973.1_NP_047668.1	AF-A0A1E5A527-F1-model_v4	1.199e-05	127	0.2913	1	0.4995	Flavobacteriaceae bacterium (ex Bugula neritina AB1)	Ld-bro-a
NC_001973.1_NP_047668.1	AF-A0A6C0CSX7-F1-model_v4	1.772e-05	127	0.2596	1	0.5778	viral metagenome	Ld-bro-a
NC_001973.1_NP_047668.1	AF-A0A1B6K673-F1-model_v4	0.0008293	126	0.3676	1	0.6439	Homalodisca liturata	Ld-bro-a
NC_001973.1_NP_047668.1	AF-A0A212SHY1-F1-model_v4	5.711e-05	125	0.3192	1	0.5239	Rhodoblastus acidophilus	Ld-bro-a
NC_001973.1_NP_047668.1	AF-A0A0J7JWB4-F1-model_v4	0.0007843	124	0.3498	1	0.6575	Lasius niger	Ld-bro-a
NC_001973.1_NP_047668.1	AF-A0A6C0CSR1-F1-model_v4	5.496e-06	124	0.2305	1	0.5547	viral metagenome	Ld-bro-a
NC_001973.1_NP_047668.1	AF-A0A6C0J240-F1-model_v4	0.001159	123	0.3593	1	0.6677	viral metagenome	Ld-bro-a
NC_001973.1_NP_047668.1	AF-A0A4R4TQ23-F1-model_v4	0.0001947	122	0.3159	1	0.5825	Streptomyces hainanensis	Ld-bro-a
NC_001973.1_NP_047668.1	AF-A0A5S9IT69-F1-model_v4	2.617e-05	121	0.2643	1	0.5395	Candidatus Uabimicrobium amorphum	Ld-bro-a
NC_001973.1_NP_047668.1	AF-A0A268TPZ9-F1-model_v4	1.873e-05	120	0.2724	1	0.4981	Helicobacter sp. 12S02634-8	Ld-bro-a
NC_001973.1_NP_047668.1	AF-A0A5J4WCG7-F1-model_v4	0.0004018	115	0.3161	1	0.5699	Streblomastix strix	Ld-bro-a
NC_001973.1_NP_047668.1	AF-A0A373ZNJ6-F1-model_v4	0.01779	112	0.5588	1	0.5422	Clostridium sp. AF15-31	Ld-bro-a
NC_001973.1_NP_047668.1	AF-A0A5J4VZE1-F1-model_v4	5.711e-05	112	0.3088	1	0.4359	Streblomastix strix	Ld-bro-a
NC_001973.1_NP_047668.1	AF-A0A1B6GI08-F1-model_v4	0.001295	111	0.3142	1	0.6324	Cuerna arida	Ld-bro-a
NC_001973.1_NP_047668.1	AF-A0A2P8QLQ8-F1-model_v4	0.004668	108	0.3441	1	0.6527	Chroococcidiopsis sp. CCALA 051	Ld-bro-a
NC_001973.1_NP_047668.1	AF-A0A1H2WQJ6-F1-model_v4	0.002989	106	0.3052	1	0.6641	Lachnospiraceae bacterium KHCPX20	Ld-bro-a
NC_001973.1_NP_047668.1	AF-A0A1B0AL11-F1-model_v4	0.0001179	106	0.2557	1	0.5172	Glossina palpalis gambiensis	Ld-bro-a
NC_001973.1_NP_047668.1	AF-A0A5J4WM72-F1-model_v4	0.0001246	105	0.2797	1	0.4606	Streblomastix strix	Ld-bro-a
NC_001973.1_NP_047668.1	AF-A0A2J7ZN06-F1-model_v4	4.322e-05	105	0.2115	1	0.5411	Tetrabaena socialis	Ld-bro-a
NC_001973.1_NP_047668.1	AF-A0A5J4UFR2-F1-model_v4	0.0004018	103	0.3235	1	0.4474	Streblomastix strix	Ld-bro-a
NC_001973.1_NP_047668.1	AF-A0A5J4UZ25-F1-model_v4	0.0003399	101	0.2755	1	0.4904	Streblomastix strix	Ld-bro-a
NC_001973.1_NP_047668.1	AF-A0A5J4UNL0-F1-model_v4	0.01139	100	0.3949	1	0.5656	Streblomastix strix	Ld-bro-a
NC_001973.1_NP_047668.1	AF-A0A5J4UZH3-F1-model_v4	6.751e-05	98	0.2366	0.999	0.4452	Streblomastix strix	Ld-bro-a
NC_001973.1_NP_047668.1	AF-A0A6A4KM59-F1-model_v4	2.767e-05	97	0.1992	0.999	0.468	Apolygus lucorum	Ld-bro-a
NC_001973.1_NP_047668.1	AF-A0A1A9UYJ6-F1-model_v4	0.0002572	93	0.2155	0.998	0.5141	Glossina austeni	Ld-bro-a
NC_001973.1_NP_047668.1	AF-A0A849WBA4-F1-model_v4	0.0008768	89	0.2449	0.996	0.4908	Candidatus Brocadiae bacterium	Ld-bro-a
NC_001973.1_NP_047668.1	AF-A0A6C0DW41-F1-model_v4	0.0005309	89	0.2094	0.996	0.5402	viral metagenome	Ld-bro-a
NC_001973.1_NP_047668.1	AF-A0A7X8BU54-F1-model_v4	0.03284	86	0.3212	0.993	0.6209	Sphingobacteriales bacterium	Ld-bro-a
NC_001973.1_NP_047668.1	AF-A0A7Y2GSG6-F1-model_v4	0.2066	81	0.427	0.986	0.6072	Acidimicrobiales bacterium	Ld-bro-a
NC_001973.1_NP_047668.1	AF-A0A7D9JP64-F1-model_v4	0.0847	80	0.3487	0.984	0.5926	Paramuricea clavata	Ld-bro-a
NC_001973.1_NP_047668.1	AF-A0A542UBU0-F1-model_v4	0.01273	78	0.2612	0.978	0.5328	Streptomyces puniciscabiei	Ld-bro-a
NC_001973.1_NP_047668.1	AF-A0A6A4K9Q3-F1-model_v4	0.04851	77	0.295	0.975	0.5851	Apolygus lucorum	Ld-bro-a
NC_001973.1_NP_047668.1	AF-A0A6C0AMR7-F1-model_v4	0.001531	77	0.196	0.975	0.5036	viral metagenome	Ld-bro-a
NC_001973.1_NP_047668.1	AF-A0A6C0JMV8-F1-model_v4	0.002989	77	0.2227	0.975	0.4811	viral metagenome	Ld-bro-a
NC_001973.1_NP_047668.1	AF-D1PBL4-F1-model_v4	0.02778	75	0.2647	0.967	0.5566	Prevotella copri DSM 18205	Ld-bro-a
NC_001973.1_NP_047668.1	AF-A0A6C0E2E0-F1-model_v4	0.005218	74	0.2204	0.961	0.4959	viral metagenome	Ld-bro-a
NC_001973.1_NP_047668.1	AF-A0A1W9LTM0-F1-model_v4	0.06778	73	0.3269	0.956	0.513	Desulfobacteraceae bacterium IS3	Ld-bro-a
NC_001973.1_NP_047668.1	AF-W2VQI2-F1-model_v4	0.1748	72	0.3159	0.949	0.6346	Phytophthora parasitica CJ01A1	Ld-bro-a
NC_001973.1_NP_047668.1	AF-A0A835Y0Q5-F1-model_v4	0.01591	71	0.2202	0.941	0.5405	Edaphochlamys debaryana	Ld-bro-a
NC_001973.1_NP_047668.1	AF-A0A6C0DAK0-F1-model_v4	0.005218	70	0.2149	0.933	0.4471	viral metagenome	Ld-bro-a
NC_001973.1_NP_047668.1	AF-A0A6S7HUK4-F1-model_v4	0.04339	69	0.2273	0.923	0.6099	Paramuricea clavata	Ld-bro-a
NC_001973.1_NP_047668.1	AF-A0A7V9ZDH1-F1-model_v4	0.0847	67	0.3368	0.9	0.4333	Blastocatellia bacterium	Ld-bro-a
NC_001973.1_NP_047668.1	AF-A0A6A3JIG6-F1-model_v4	0.1399	67	0.2788	0.9	0.5844	Phytophthora rubi	Ld-bro-a
NC_001973.1_NP_047668.1	AF-A0A6C0K6K0-F1-model_v4	0.01273	66	0.2097	0.887	0.4828	viral metagenome	Ld-bro-a
NC_001973.1_NP_047668.1	AF-A0A1Y1IQX5-F1-model_v4	0.05423	61	0.2247	0.795	0.5019	Klebsormidium nitens	Ld-bro-a
NC_001973.1_NP_047668.1	AF-A0A2M4BD49-F1-model_v4	5.857	59	0.5049	0.747	0.6985	Anopheles marajoara	Ld-bro-a
NC_001973.1_NP_047668.1	AF-A0A355D5C4-F1-model_v4	0.3608	58	0.2869	0.72	0.5325	Clostridium sp.	Ld-bro-a
NC_001973.1_NP_047668.1	AF-G4ZUS3-F1-model_v4	4.432	58	0.5087	0.72	0.6145	Phytophthora sojae strain P6497	Ld-bro-a
NC_001973.1_NP_047668.1	AF-A0A6C0AQR7-F1-model_v4	0.03106	58	0.2042	0.72	0.4417	viral metagenome	Ld-bro-a
NC_001973.1_NP_047668.1	AF-A0A2M4A2F2-F1-model_v4	7.739	57	0.526	0.692	0.6986	Anopheles triannulatus	Ld-bro-a
NC_001973.1_NP_047668.1	AF-A0A6G5R0M6-F1-model_v4	0.63	56	0.285	0.663	0.5696	Campylobacter sp. RM6914	Ld-bro-a
NC_001973.1_NP_047668.1	AF-A0A397CA17-F1-model_v4	0.7874	56	0.3276	0.663	0.5326	Aphanomyces astaci	Ld-bro-a
NC_001973.1_NP_047668.1	AF-A0A6A4CXC9-F1-model_v4	1.04	55	0.3252	0.632	0.5581	Phytophthora rubi	Ld-bro-a
NC_001973.1_NP_047668.1	AF-A0A081AG34-F1-model_v4	0.2887	54	0.2447	0.601	0.5056	Phytophthora parasitica P1976	Ld-bro-a
NC_001973.1_NP_047668.1	AF-Q6MK59-F1-model_v4	6.548	53	0.4752	0.569	0.6335	Bdellovibrio bacteriovorus HD100	Ld-bro-a
NC_001973.1_NP_047668.1	AF-A0A222SYA1-F1-model_v4	2.148	52	0.3472	0.537	0.5747	Streptomyces sp. 11-1-2	Ld-bro-a
NC_001973.1_NP_047668.1	AF-A0A6C0ECS2-F1-model_v4	0.2443	52	0.1994	0.537	0.5637	viral metagenome	Ld-bro-a
NC_001973.1_NP_047668.1	AF-A0A387HG99-F1-model_v4	1.625	52	0.3215	0.537	0.561	Streptomyces hundungensis	Ld-bro-a
NC_001973.1_NP_047668.1	AF-A0A0F7FVQ8-F1-model_v4	3.172	51	0.3449	0.505	0.6145	Streptomyces xiamenensis	Ld-bro-a
NC_001973.1_NP_047668.1	AF-J9LJQ2-F1-model_v4	1.921	51	0.3195	0.505	0.5779	Acyrthosiphon pisum	Ld-bro-a
NC_001973.1_NP_047668.1	AF-A0A7K5Q6L5-F1-model_v4	0.6662	51	0.2629	0.505	0.5171	Erythrocercus mccallii	Ld-bro-a
NC_001973.1_NP_047668.1	AF-A0A2T6N1G9-F1-model_v4	0.8803	51	0.2941	0.505	0.4996	gamma proteobacterium symbiont of Ctena orbiculata	Ld-bro-a
NC_001973.1_NP_047668.1	AF-A0A1F6WZ42-F1-model_v4	0.8326	50	0.2621	0.473	0.538	Candidatus Nomurabacteria bacterium RIFCSPLOWO2_01_FULL_33_24	Ld-bro-a
NC_001973.1_NP_047668.1	AF-A0A7X0K3J1-F1-model_v4	3.965	49	0.3748	0.442	0.5715	Streptomyces sp. CNZ298	Ld-bro-a
NC_001973.1_NP_047668.1	AF-A0A372NM31-F1-model_v4	1.375	49	0.2923	0.442	0.5202	Mucilaginibacter conchicola	Ld-bro-a
NC_001973.1_NP_047668.1	AF-A0A5N3UYZ5-F1-model_v4	0.4265	48	0.2227	0.411	0.4887	Muntiacus muntjak	Ld-bro-a
NC_001973.1_NP_047668.1	AF-A0A7K7DFE0-F1-model_v4	0.5959	48	0.2373	0.411	0.4913	Pheucticus melanocephalus	Ld-bro-a
NC_001973.1_NP_047668.1	AF-A0A7S1C7K1-F1-model_v4	4.192	46	0.3479	0.353	0.5544	Bicosoecida sp. CB-2014	Ld-bro-a
NC_001973.1_NP_047668.1	AF-L1IKF2-F1-model_v4	0.1059	46	0.1566	0.353	0.4678	Guillardia theta CCMP2712	Ld-bro-a
NC_001973.1_NP_047668.1	AF-A0A0P1AAM2-F1-model_v4	0.7874	46	0.2234	0.353	0.5223	Plasmopara halstedii	Ld-bro-a
NC_001973.1_NP_047668.1	AF-A0A2H9THV4-F1-model_v4	2.538	45	0.3011	0.326	0.5205	Paramicrosporidium saccamoebae	Ld-bro-a
NC_001973.1_NP_047668.1	AF-A0A7M4EP07-F1-model_v4	0.5636	45	0.2175	0.326	0.4624	Crocodylus porosus	Ld-bro-a
NC_001973.1_NP_047668.1	AF-A6Q251-F1-model_v4	1.718	44	0.2275	0.301	0.5817	Nitratiruptor sp. SB155-2	Ld-bro-a
NC_001973.1_NP_047668.1	AF-A0A2G4SW23-F1-model_v4	1.537	44	0.2619	0.301	0.4929	Rhizopus microsporus ATCC 52813	Ld-bro-a
NC_001973.1_NP_047668.1	AF-N2A5N1-F1-model_v4	0.3413	44	0.1804	0.301	0.4877	Eubacterium plexicaudatum ASF492	Ld-bro-a
NC_001973.1_NP_047668.1	AF-G1SJ27-F1-model_v4	0.533	44	0.2104	0.301	0.4587	Oryctolagus cuniculus	Ld-bro-a
NC_001973.1_NP_047668.1	AF-A0A6J1TH94-F1-model_v4	1.3	44	0.2216	0.301	0.564	Frankliniella occidentalis	Ld-bro-a
NC_001973.1_NP_047668.1	AF-A0A2S5AIW1-F1-model_v4	8.652	43	0.3931	0.277	0.5685	Avibacterium endocarditidis	Ld-bro-a
NC_001973.1_NP_047668.1	AF-G5A2I6-F1-model_v4	0.5041	42	0.176	0.254	0.4901	Phytophthora sojae strain P6497	Ld-bro-a
NC_001973.1_NP_047668.1	AF-A0A2J6Q0V3-F1-model_v4	4.686	42	0.3124	0.254	0.5324	Hyaloscypha hepaticicola	Ld-bro-a
NC_001973.1_NP_047668.1	AF-A0A449B3D0-F1-model_v4	1.537	42	0.23	0.254	0.5054	Mycoplasmopsis citelli	Ld-bro-a
NC_001973.1_NP_047668.1	AF-A0A2U0ZVQ9-F1-model_v4	4.686	41	0.2933	0.233	0.5497	Filimonas sp. YR581	Ld-bro-a
NC_001973.1_NP_047668.1	AF-A0A7K0IX92-F1-model_v4	1.163	40	0.213	0.214	0.4651	Geobacter sp.	Ld-bro-a
NC_001973.1_NP_047668.1	AF-A0A1Y2BUB3-F1-model_v4	6.193	39	0.2968	0.196	0.5402	Rhizoclosmatium globosum	Ld-bro-a
NC_001973.1_NP_047668.1	AF-A0A7C5EBE3-F1-model_v4	2.538	39	0.2372	0.196	0.4975	Candidatus Parcubacteria bacterium	Ld-bro-a
NC_001973.1_NP_047668.1	AF-A0A3B1J417-F1-model_v4	6.923	38	0.3082	0.179	0.5121	Astyanax mexicanus	Ld-bro-a
NC_001973.1_NP_047668.1	AF-T1CDN3-F1-model_v4	2.538	38	0.2247	0.179	0.4953	mine drainage metagenome	Ld-bro-a
NC_001973.1_NP_047668.1	AF-L5NC06-F1-model_v4	9.672	37	0.2972	0.164	0.5597	Halobacillus sp. BAB-2008	Ld-bro-a
NC_001973.1_NP_047668.1	AF-A0A6I4XC52-F1-model_v4	6.923	37	0.2724	0.164	0.5466	Enterococcus faecium	Ld-bro-a
NC_001973.1_NP_047668.1	AF-A0A7J2NF90-F1-model_v4	6.923	36	0.2632	0.15	0.5459	Candidatus Woesearchaeota archaeon	Ld-bro-a
NC_001973.1_NP_047668.1	AF-A0A1Y3BSS2-F1-model_v4	9.672	36	0.3008	0.15	0.5291	Euroglyphus maynei	Ld-bro-a
NC_001973.1_NP_047668.1	AF-A0A2I0LQ89-F1-model_v4	3.354	36	0.223	0.15	0.4908	Columba livia	Ld-bro-a
NC_001973.1_NP_047668.1	AF-A2EBK1-F1-model_v4	5.239	36	0.2558	0.15	0.4926	Trichomonas vaginalis	Ld-bro-a
NC_001973.1_NP_047668.1	AF-A0A077ZS69-F1-model_v4	8.652	36	0.281	0.15	0.5452	Stylonychia lemnae	Ld-bro-a
NC_001973.1_NP_047668.1	AF-A0A7M7NA97-F1-model_v4	2.401	35	0.2027	0.138	0.467	Strongylocentrotus purpuratus	Ld-bro-a
NC_001973.1_NP_047668.1	AF-A0A1H9VJ60-F1-model_v4	1.454	35	0.1892	0.138	0.4147	Salipaludibacillus aurantiacus	Ld-bro-a
NC_001973.1_NP_047668.1	AF-A0A061I600-F1-model_v4	0.5959	35	0.1298	0.138	0.4771	Cricetulus griseus	Ld-bro-a
NC_001973.1_NP_047668.1	AF-G1V6H2-F1-model_v4	6.193	35	0.2416	0.138	0.5398	Bilophila sp. 4_1_30	Ld-bro-a
NC_001973.1_NP_047668.1	AF-A0A2J7ZUA0-F1-model_v4	3.965	34	0.2118	0.126	0.4827	Tetrabaena socialis	Ld-bro-a
NC_001973.1_NP_047668.1	AF-A0A6G5R3X0-F1-model_v4	8.183	34	0.2268	0.126	0.5799	Campylobacter sp. RM16192	Ld-bro-a
NC_001973.1_NP_047668.1	AF-A0A7S2X9F5-F1-model_v4	6.923	34	0.2514	0.126	0.5019	Lotharella oceanica	Ld-bro-a
NC_001973.1_NP_047668.1	AF-A0A8B6EV17-F1-model_v4	3.172	34	0.1934	0.126	0.4925	Mytilus galloprovincialis	Ld-bro-a
NC_001973.1_NP_047668.1	AF-A0A348PCH7-F1-model_v4	4.192	34	0.2118	0.126	0.498	Phycisphaerales bacterium	Ld-bro-a
NC_001973.1_NP_047668.1	AF-A0A2E9QXT4-F1-model_v4	5.857	34	0.2484	0.126	0.4824	Deltaproteobacteria bacterium	Ld-bro-a
NC_001973.1_NP_047668.1	AF-A0A2N5ZX33-F1-model_v4	2.684	33	0.2037	0.116	0.4323	Salinivirgaceae bacterium	Ld-bro-a
NC_001973.1_NP_047668.1	AF-A0A7M7JY18-F1-model_v4	9.672	32	0.2564	0.106	0.4864	Varroa destructor	Ld-bro-a
NC_001973.1_NP_047668.1	AF-A0A379FJR3-F1-model_v4	7.739	32	0.2256	0.106	0.5085	Proteus mirabilis	Ld-bro-a
NC_001973.1_NP_047668.1	AF-Q89QY8-F1-model_v4	8.652	32	0.2643	0.106	0.4682	Bradyrhizobium diazoefficiens USDA 110	Ld-bro-a
NC_001973.1_NP_047668.1	AF-A0A7C3BMQ5-F1-model_v4	9.148	32	0.2475	0.106	0.4995	Dehalococcoidia bacterium	Ld-bro-a
NC_001973.1_NP_047668.1	AF-A0A520IQL7-F1-model_v4	1.817	31	0.1569	0.098	0.4402	Pedobacter sp.	Ld-bro-a
NC_001973.1_NP_047668.1	AF-A0A855N789-F1-model_v4	7.739	30	0.1965	0.09	0.5183	Campylobacter hyointestinalis subsp. hyointestinalis	Ld-bro-a
NC_001973.1_NP_047668.1	AF-A0A4R1IEF6-F1-model_v4	7.739	30	0.2155	0.09	0.4858	Paraburkholderia sp. BL8N3	Ld-bro-a
NC_001973.1_NP_047668.1	AF-K0T4G6-F1-model_v4	8.652	30	0.2135	0.09	0.5125	Thalassiosira oceanica	Ld-bro-a
NC_001973.1_NP_047668.1	AF-A0A0C3ARC5-F1-model_v4	7.739	29	0.1983	0.082	0.4822	Serendipita vermifera MAFF 305830	Ld-bro-a
NC_001973.1_NP_047668.1	AF-A0A1B9G413-F1-model_v4	5.539	29	0.1948	0.082	0.429	Kwoniella bestiolae CBS 10118	Ld-bro-a
NC_001973.1_NP_047668.1	AF-K3WSP3-F1-model_v4	9.672	29	0.1988	0.082	0.5259	Globisporangium ultimum DAOM BR144	Ld-bro-a
NC_001973.1_NP_047668.1	AF-A0A814WIH0-F1-model_v4	8.652	29	0.2244	0.082	0.462	Rotaria sordida	Ld-bro-a
NC_001973.1_NP_047668.1	AF-A0A0S9KEE8-F1-model_v4	5.539	28	0.1771	0.076	0.4645	Leifsonia sp. Leaf264	Ld-bro-a
NC_001973.1_NP_047668.1	AF-A0A2G3DI28-F1-model_v4	8.183	28	0.2086	0.076	0.4377	Capsicum chinense	Ld-bro-a
NC_001973.1_NP_047668.1	AF-A0A7H8QV34-F1-model_v4	5.539	28	0.1683	0.076	0.4801	Talaromyces rugulosus	Ld-bro-a
NC_001973.1_NP_047668.1	AF-A0A7S3YHS5-F1-model_v4	9.148	27	0.1845	0.069	0.4679	Lotharella globosa	Ld-bro-a
NC_001973.1_NP_047668.1	AF-A0A1F8EA18-F1-model_v4	4.432	26	0.143	0.063	0.4609	Candidatus Yanofskybacteria bacterium RIFCSPHIGHO2_01_FULL_41_21	Ld-bro-a
NC_001973.1_NP_047668.1	AF-A0A673CAA4-F1-model_v4	9.672	24	0.1549	0.051	0.4787	Sphaeramia orbicularis	Ld-bro-a
NC_001973.1_NP_047668.1	AF-A0A1H4GCL7-F1-model_v4	5.239	24	0.1279	0.051	0.4661	Flavobacterium gillisiae	Ld-bro-a
NC_001973.1_NP_047668.1	AF-A0A6L3ZTV0-F1-model_v4	3.75	24	0.1159	0.051	0.4512	Sphingopyxis terrae	Ld-bro-a
NC_001973.1_NP_047668.1	AF-A0A5S3WNK8-F1-model_v4	9.148	24	0.165	0.051	0.4253	Pseudoalteromonas rubra	Ld-bro-a
NC_001973.1_NP_047668.1	AF-A0A1W9UXR7-F1-model_v4	8.652	23	0.1615	0.045	0.4073	Anaerolineaceae bacterium 4572_32.1	Ld-bro-a
NC_001973.1_NP_047689.1	AF-A0A0N0DEQ2-F1-model_v4	0.9531	46	0.2306	0.353	0.5595	Fusarium langsethiae	LdOrf-53 peptide
NC_001973.1_NP_047689.1	AF-A0A7J6FT46-F1-model_v4	0.3032	39	0.1365	0.196	0.5221	Cannabis sativa	LdOrf-53 peptide
NC_001973.1_NP_047689.1	AF-A0A7W4DH50-F1-model_v4	2.672	37	0.2054	0.164	0.5651	Candidatus Saccharibacteria bacterium	LdOrf-53 peptide
NC_001973.1_NP_047689.1	AF-A0A0N4WFV2-F1-model_v4	0.171	36	0.1164	0.15	0.4612	Haemonchus placei	LdOrf-53 peptide
NC_001973.1_NP_047689.1	AF-W6UMG0-F1-model_v4	2.829	36	0.1961	0.15	0.5593	Echinococcus granulosus	LdOrf-53 peptide
NC_001973.1_NP_047689.1	AF-A0A074RPI4-F1-model_v4	2.672	35	0.191	0.138	0.5305	Rhizoctonia solani 123E	LdOrf-53 peptide
NC_001973.1_NP_047689.1	AF-A0A6L7ZFU2-F1-model_v4	3.359	35	0.1836	0.138	0.6006	Gammaproteobacteria bacterium	LdOrf-53 peptide
NC_001973.1_NP_047689.1	AF-A0A7S3TZS8-F1-model_v4	3.173	35	0.1753	0.138	0.6028	Strombidinopsis acuminata	LdOrf-53 peptide
NC_001973.1_NP_047689.1	AF-A0A537YD76-F1-model_v4	0.6028	35	0.1371	0.138	0.4822	Actinomycetia bacterium	LdOrf-53 peptide
NC_001973.1_NP_047689.1	AF-A0A813FLN2-F1-model_v4	9.973	35	0.2792	0.138	0.5901	Polarella glacialis	LdOrf-53 peptide
NC_001973.1_NP_047689.1	AF-A0A183FTL3-F1-model_v4	3.767	34	0.1941	0.126	0.5709	Heligmosomoides polygyrus	LdOrf-53 peptide
NC_001973.1_NP_047689.1	AF-A0A3C0HG32-F1-model_v4	0.9	34	0.1412	0.126	0.5066	Xanthomonadaceae bacterium	LdOrf-53 peptide
NC_001973.1_NP_047689.1	AF-A0A1B7Y9E9-F1-model_v4	5.625	33	0.2036	0.116	0.5813	Colletotrichum higginsianum IMI 349063	LdOrf-53 peptide
NC_001973.1_NP_047689.1	AF-A0A7S0TNF5-F1-model_v4	3.359	33	0.1809	0.116	0.5498	Hemiselmis andersenii	LdOrf-53 peptide
NC_001973.1_NP_047689.1	AF-A0A371D962-F1-model_v4	5.625	32	0.1799	0.106	0.6192	Polyporus brumalis	LdOrf-53 peptide
NC_001973.1_NP_047689.1	AF-A0A7S1F0W0-F1-model_v4	3.767	32	0.1634	0.106	0.5823	Noctiluca scintillans	LdOrf-53 peptide
NC_001973.1_NP_047689.1	AF-U6K3N5-F1-model_v4	1.423	32	0.1503	0.106	0.4807	Eimeria mitis	LdOrf-53 peptide
NC_001973.1_NP_047689.1	AF-A0A351TGK6-F1-model_v4	1.69	31	0.1432	0.098	0.4793	Lachnospiraceae bacterium	LdOrf-53 peptide
NC_001973.1_NP_047689.1	AF-A0A5C6B1F4-F1-model_v4	3.989	31	0.1894	0.098	0.4962	Stieleria varia	LdOrf-53 peptide
NC_001973.1_NP_047689.1	AF-A0A812I179-F1-model_v4	1.507	31	0.1554	0.098	0.4477	Symbiodinium sp. CCMP2592	LdOrf-53 peptide
NC_001973.1_NP_047689.1	AF-A0A6G0WWT7-F1-model_v4	3.359	31	0.1494	0.098	0.5631	Aphanomyces euteiches	LdOrf-53 peptide
NC_001973.1_NP_047689.1	AF-A0A5N6KQA5-F1-model_v4	6.679	31	0.1977	0.098	0.5461	Carpinus fangiana	LdOrf-53 peptide
NC_001973.1_NP_047689.1	AF-A0A1I2GZI4-F1-model_v4	3.557	30	0.1587	0.09	0.5356	Flavimobilis marinus	LdOrf-53 peptide
NC_001973.1_NP_047689.1	AF-A0A167TDG4-F1-model_v4	2.672	30	0.1494	0.09	0.5133	Fibularhizoctonia sp. CBS 109695	LdOrf-53 peptide
NC_001973.1_NP_047689.1	AF-A0A6L8AD13-F1-model_v4	9.418	30	0.1932	0.09	0.5909	Gammaproteobacteria bacterium	LdOrf-53 peptide
NC_001973.1_NP_047689.1	AF-A0A1D3CSW8-F1-model_v4	1.69	30	0.1382	0.09	0.4804	Cyclospora cayetanensis	LdOrf-53 peptide
NC_001973.1_NP_047689.1	AF-A0A087X3P3-F1-model_v4	1.423	30	0.1221	0.09	0.5037	Poecilia formosa	LdOrf-53 peptide
NC_001973.1_NP_047689.1	AF-A0A813LR46-F1-model_v4	8.893	30	0.1978	0.09	0.579	Polarella glacialis	LdOrf-53 peptide
NC_001973.1_NP_047689.1	AF-A0A5C6JRJ4-F1-model_v4	1.198	29	0.1222	0.082	0.4425	Streptomyces misionensis	LdOrf-53 peptide
NC_001973.1_NP_047689.1	AF-A0A6N8UM85-F1-model_v4	6.679	28	0.1525	0.076	0.5886	Gammaproteobacteria bacterium	LdOrf-53 peptide
NC_001973.1_NP_047689.1	AF-A0A225VFA4-F1-model_v4	7.073	28	0.1739	0.076	0.5462	Phytophthora megakarya	LdOrf-53 peptide
NC_001973.1_NP_047689.1	AF-A0A4D9BXX5-F1-model_v4	9.973	28	0.1856	0.076	0.5788	Salvia splendens	LdOrf-53 peptide
NC_001973.1_NP_047689.1	AF-A0A3N0AY95-F1-model_v4	2.829	28	0.1359	0.076	0.5061	Slackia equolifaciens	LdOrf-53 peptide
NC_001973.1_NP_047689.1	AF-A0A2T7PWW8-F1-model_v4	3.173	28	0.1403	0.076	0.5018	Pomacea canaliculata	LdOrf-53 peptide
NC_001973.1_NP_047689.1	AF-A0A1G8G4D7-F1-model_v4	2.672	28	0.1289	0.076	0.5134	Paraburkholderia phenazinium	LdOrf-53 peptide
NC_001973.1_NP_047689.1	AF-A0A699JNI8-F1-model_v4	1.596	28	0.1253	0.076	0.4627	Tanacetum cinerariifolium	LdOrf-53 peptide
NC_001973.1_NP_047689.1	AF-A0A269PV25-F1-model_v4	5.016	28	0.1532	0.076	0.5349	Pseudoalteromonas sp. NBT06-2	LdOrf-53 peptide
NC_001973.1_NP_047689.1	AF-A0A1I8AZ05-F1-model_v4	9.418	28	0.1794	0.076	0.5709	Meloidogyne hapla	LdOrf-53 peptide
NC_001973.1_NP_047689.1	AF-A0A383V5X6-F1-model_v4	2.672	28	0.142	0.076	0.4734	Tetradesmus obliquus	LdOrf-53 peptide
NC_001973.1_NP_047689.1	AF-A0A813EM85-F1-model_v4	7.49	28	0.1741	0.076	0.5352	Polarella glacialis	LdOrf-53 peptide
NC_001973.1_NP_047689.1	AF-A0A507FDL7-F1-model_v4	8.398	28	0.1655	0.076	0.5744	Chytriomyces confervae	LdOrf-53 peptide
NC_001973.1_NP_047689.1	AF-A0A7V5AQG7-F1-model_v4	2.829	28	0.1352	0.076	0.4927	bacterium	LdOrf-53 peptide
NC_001973.1_NP_047689.1	AF-A0A5N5QAM9-F1-model_v4	7.073	28	0.1812	0.076	0.5189	Ceratobasidium theobromae	LdOrf-53 peptide
NC_001973.1_NP_047689.1	AF-A0A1F8MR12-F1-model_v4	4.737	28	0.156	0.076	0.5167	Chloroflexi bacterium RBG_13_51_52	LdOrf-53 peptide
NC_001973.1_NP_047689.1	AF-A0A4Q5B7J9-F1-model_v4	6.307	27	0.1742	0.069	0.4573	Bifidobacterium pseudolongum subsp. globosum	LdOrf-53 peptide
NC_001973.1_NP_047689.1	AF-A0A5N6P6F8-F1-model_v4	8.398	27	0.1613	0.069	0.5523	Mikania micrantha	LdOrf-53 peptide
NC_001973.1_NP_047689.1	AF-A0A158JI71-F1-model_v4	2.25	27	0.1191	0.069	0.4938	Caballeronia choica	LdOrf-53 peptide
NC_001973.1_NP_047689.1	AF-A0A2T4V142-F1-model_v4	3.359	27	0.1374	0.069	0.4801	Vitiosangium sp. GDMCC 1.1324	LdOrf-53 peptide
NC_001973.1_NP_047689.1	AF-A0A0D3E7L6-F1-model_v4	9.418	27	0.165	0.069	0.5679	Brassica oleracea var. oleracea	LdOrf-53 peptide
NC_001973.1_NP_047689.1	AF-A0A804HMA2-F1-model_v4	7.49	26	0.1679	0.063	0.4879	Musa acuminata subsp. malaccensis	LdOrf-53 peptide
NC_001973.1_NP_047689.1	AF-A0A3L7INM4-F1-model_v4	1.895	26	0.1121	0.063	0.473	Cricetulus griseus	LdOrf-53 peptide
NC_001973.1_NP_047689.1	AF-A0A2E3KJ61-F1-model_v4	6.679	26	0.1539	0.063	0.5149	Phycisphaerae bacterium	LdOrf-53 peptide
NC_001973.1_NP_047689.1	AF-A0A239CGV5-F1-model_v4	5.956	26	0.1475	0.063	0.4935	Noviherbaspirillum humi	LdOrf-53 peptide
NC_001973.1_NP_047689.1	AF-A0A6I8U5B8-F1-model_v4	2.829	26	0.1254	0.063	0.4509	Aedes aegypti	LdOrf-53 peptide
NC_001973.1_NP_047689.1	AF-A0A0L6VJL9-F1-model_v4	7.073	26	0.1614	0.063	0.506	Puccinia sorghi	LdOrf-53 peptide
NC_001973.1_NP_047689.1	AF-A0A0L0RYE7-F1-model_v4	6.307	26	0.1677	0.063	0.4673	Allomyces macrogynus ATCC 38327	LdOrf-53 peptide
NC_001973.1_NP_047689.1	AF-A0A1S3AN63-F1-model_v4	9.418	25	0.1506	0.057	0.5351	Erinaceus europaeus	LdOrf-53 peptide
NC_001973.1_NP_047689.1	AF-A0A0A9DHB1-F1-model_v4	4.224	25	0.1269	0.057	0.4825	Arundo donax	LdOrf-53 peptide
NC_001973.1_NP_047689.1	AF-D2VY46-F1-model_v4	6.307	25	0.1407	0.057	0.5003	Naegleria gruberi	LdOrf-53 peptide
NC_001973.1_NP_047689.1	AF-A0A7Y5U8T1-F1-model_v4	6.307	25	0.1295	0.057	0.5298	Polyangiaceae bacterium	LdOrf-53 peptide
NC_001973.1_NP_047689.1	AF-A0A834HJ36-F1-model_v4	4.737	25	0.1286	0.057	0.477	Rhododendron simsii	LdOrf-53 peptide
NC_001973.1_NP_047689.1	AF-C7HTJ4-F1-model_v4	2.672	24	0.1082	0.051	0.4449	Anaerococcus vaginalis ATCC 51170	LdOrf-53 peptide
NC_001973.1_NP_047689.1	AF-M5T5T2-F1-model_v4	5.956	24	0.1398	0.051	0.4678	Rhodopirellula sp. SWK7	LdOrf-53 peptide
NC_001973.1_NP_047689.1	AF-A0A146HYV9-F1-model_v4	5.016	24	0.1246	0.051	0.4718	Mycena chlorophos	LdOrf-53 peptide
NC_001973.1_NP_047689.1	AF-A0A6B2L2X0-F1-model_v4	5.956	24	0.1309	0.051	0.4822	Arcella intermedia	LdOrf-53 peptide
NC_001973.1_NP_047689.1	AF-A0A4T0HYK9-F1-model_v4	8.398	24	0.1365	0.051	0.511	Wallemia ichthyophaga	LdOrf-53 peptide
NC_001973.1_NP_047689.1	AF-A0A836HYV7-F1-model_v4	9.418	24	0.1426	0.051	0.5119	Porcisia hertigi	LdOrf-53 peptide
NC_001973.1_NP_047689.1	AF-A0A135LNM4-F1-model_v4	8.398	23	0.1458	0.045	0.456	Penicillium griseofulvum	LdOrf-53 peptide
NC_001973.1_NP_047689.1	AF-B7G760-F1-model_v4	8.398	23	0.1439	0.045	0.4483	Phaeodactylum tricornutum CCAP 1055/1	LdOrf-53 peptide
NC_001973.1_NP_047689.1	AF-A0A0N0U5R8-F1-model_v4	2.672	23	0.09991	0.045	0.4596	Melipona quadrifasciata	LdOrf-53 peptide
NC_001973.1_NP_047689.1	AF-A0A1Y2EMK2-F1-model_v4	6.307	23	0.1268	0.045	0.4761	Neocallimastix californiae	LdOrf-53 peptide
NC_001973.1_NP_047689.1	AF-A0A1E3JXG5-F1-model_v4	5.016	23	0.1238	0.045	0.4456	Cryptococcus amylolentus CBS 6273	LdOrf-53 peptide
NC_001973.1_NP_047689.1	AF-A0A6N2UNY8-F1-model_v4	5.956	23	0.1279	0.045	0.4614	Anaerococcus vaginalis	LdOrf-53 peptide
NC_001973.1_NP_047689.1	AF-K8FCW7-F1-model_v4	4.737	23	0.1167	0.045	0.4676	Bathycoccus prasinos	LdOrf-53 peptide
NC_001973.1_NP_047689.1	AF-A0A0E0J550-F1-model_v4	9.418	22	0.1242	0.04	0.4958	Oryza nivara	LdOrf-53 peptide
NC_001973.1_NP_047689.1	AF-V5BUH7-F1-model_v4	7.931	22	0.1321	0.04	0.4628	Trypanosoma cruzi Dm28c	LdOrf-53 peptide
NC_001973.1_NP_047689.1	AF-A0A328WXN6-F1-model_v4	5.956	22	0.1115	0.04	0.4814	Paraburkholderia unamae	LdOrf-53 peptide
NC_001973.1_NP_047689.1	AF-A0A7S4EH68-F1-model_v4	2.125	22	0.08368	0.04	0.4431	Pseudo-nitzschia australis	LdOrf-53 peptide
NC_001973.1_NP_047689.1	AF-A0A397E9Q8-F1-model_v4	3.767	22	0.1035	0.04	0.4517	Aphanomyces astaci	LdOrf-53 peptide
NC_001973.1_NP_047689.1	AF-A0A4Y7K5K1-F1-model_v4	6.307	22	0.1077	0.04	0.5106	Papaver somniferum	LdOrf-53 peptide
NC_001973.1_NP_047689.1	AF-A0A7S3ZU53-F1-model_v4	9.973	21	0.1183	0.034	0.5032	Pelagomonas calceolata	LdOrf-53 peptide
NC_001973.1_NP_047689.1	AF-A0A0G4NE47-F1-model_v4	8.398	21	0.1178	0.034	0.4827	Verticillium longisporum	LdOrf-53 peptide
NC_001973.1_NP_047689.1	AF-A0A212CHE7-F1-model_v4	6.679	21	0.1103	0.034	0.4848	Cervus elaphus hippelaphus	LdOrf-53 peptide
NC_001973.1_NP_047689.1	AF-A0A804PJX3-F1-model_v4	9.973	21	0.1325	0.034	0.4578	Zea mays	LdOrf-53 peptide
NC_001973.1_NP_047689.1	AF-A0A3B9YGD0-F1-model_v4	9.973	21	0.1222	0.034	0.4696	Elusimicrobia bacterium	LdOrf-53 peptide
NC_001973.1_NP_047689.1	AF-A0A847HPY6-F1-model_v4	4.224	21	0.1046	0.034	0.4311	Candidatus Peribacteria bacterium	LdOrf-53 peptide
NC_001973.1_NP_047689.1	AF-A0A6A5BUB0-F1-model_v4	9.973	21	0.1222	0.034	0.4769	Naegleria fowleri	LdOrf-53 peptide
NC_001973.1_NP_047689.1	AF-A0A0N4YVT9-F1-model_v4	5.312	20	0.09447	0.029	0.4634	Nippostrongylus brasiliensis	LdOrf-53 peptide
NC_001973.1_NP_047689.1	AF-A0A662YGZ1-F1-model_v4	7.073	20	0.1046	0.029	0.4655	Nothophytophthora sp. Chile5	LdOrf-53 peptide
NC_001973.1_NP_047689.1	AF-A0A643CDT8-F1-model_v4	7.931	20	0.1222	0.029	0.4215	Balaenoptera physalus	LdOrf-53 peptide
NC_001973.1_NP_047689.1	AF-A0A0D2I386-F1-model_v4	8.893	19	0.1155	0.024	0.4207	Rhinocladiella mackenziei CBS 650.93	LdOrf-53 peptide
NC_001973.1_NP_047689.1	AF-A0A670I2U1-F1-model_v4	5.956	19	0.09099	0.024	0.448	Podarcis muralis	LdOrf-53 peptide
NC_001973.1_NP_047689.1	AF-Q4DMN2-F1-model_v4	6.679	19	0.1079	0.024	0.4083	Trypanosoma cruzi strain CL Brener	LdOrf-53 peptide
NC_001973.1_NP_047689.1	AF-A0A3L6VQB2-F1-model_v4	7.931	19	0.09559	0.024	0.4604	Aphanomyces astaci	LdOrf-53 peptide
NC_001973.1_NP_047710.1	AF-A0A821XPL2-F1-model_v4	1.051e-08	328	0.8202	1	0.7544	Pieris macdunnoughi	Ld-bro-e
NC_001973.1_NP_047710.1	AF-A0A821UI83-F1-model_v4	1.238e-07	290	0.8017	1	0.7419	Pieris macdunnoughi	Ld-bro-e
NC_001973.1_NP_047710.1	AF-A0A2T1BWH6-F1-model_v4	0.001455	159	0.734	1	0.6849	Merismopedia glauca CCAP 1448/3	Ld-bro-e
NC_001973.1_NP_047710.1	AF-A0A3A5QBS5-F1-model_v4	0.001069	147	0.6625	1	0.6188	Bacteroides sp. AM54-2NS	Ld-bro-e
NC_001973.1_NP_047710.1	AF-A0A1I3P7N9-F1-model_v4	0.001368	147	0.6743	1	0.6312	Terrisporobacter glycolicus	Ld-bro-e
NC_001973.1_NP_047710.1	AF-A0A173YTU0-F1-model_v4	0.001069	142	0.6565	1	0.5868	Bifidobacterium pseudocatenulatum	Ld-bro-e
NC_001973.1_NP_047710.1	AF-A0A238DR56-F1-model_v4	0.003242	141	0.6967	1	0.6409	Thiomonas sp. X19	Ld-bro-e
NC_001973.1_NP_047710.1	AF-A0A7K3QSQ9-F1-model_v4	0.001861	140	0.675	1	0.6011	Streptomyces bauhiniae	Ld-bro-e
NC_001973.1_NP_047710.1	AF-A0A497CD63-F1-model_v4	0.002534	139	0.6519	1	0.6441	Chloroflexi bacterium	Ld-bro-e
NC_001973.1_NP_047710.1	AF-A0A1H7JIK7-F1-model_v4	0.003901	139	0.6929	1	0.6438	Streptacidiphilus jiangxiensis	Ld-bro-e
NC_001973.1_NP_047710.1	AF-A0A839HCW2-F1-model_v4	0.004149	138	0.6742	1	0.6574	Thiospirillum jenense	Ld-bro-e
NC_001973.1_NP_047710.1	AF-A0A6G9Z753-F1-model_v4	0.006007	138	0.7176	1	0.6518	Nocardia terpenica	Ld-bro-e
NC_001973.1_NP_047710.1	AF-T4W113-F1-model_v4	0.004413	137	0.6854	1	0.64	Paraclostridium bifermentans ATCC 19299	Ld-bro-e
NC_001973.1_NP_047710.1	AF-A0A401W4U0-F1-model_v4	0.003048	134	0.666	1	0.6025	Streptomyces paromomycinus	Ld-bro-e
NC_001973.1_NP_047710.1	AF-A0A7C3E0B5-F1-model_v4	0.002382	133	0.6525	1	0.5829	Gracilinema caldarium	Ld-bro-e
NC_001973.1_NP_047710.1	AF-A3WWY3-F1-model_v4	0.002382	132	0.6332	1	0.5903	Nitrobacter sp. Nb-311A	Ld-bro-e
NC_001973.1_NP_047710.1	AF-A0A5J4R0A1-F1-model_v4	0.001455	132	0.6088	1	0.5722	termite gut metagenome	Ld-bro-e
NC_001973.1_NP_047710.1	AF-A0A0F2QVD8-F1-model_v4	0.004413	131	0.6705	1	0.6026	Desulfatitalea sp. BRH_c12	Ld-bro-e
NC_001973.1_NP_047710.1	AF-A0A1E5A527-F1-model_v4	0.006795	131	0.6802	1	0.6382	Flavobacteriaceae bacterium (ex Bugula neritina AB1)	Ld-bro-e
NC_001973.1_NP_047710.1	AF-A0A1N7MFK4-F1-model_v4	0.004694	130	0.66	1	0.6035	Insolitispirillum peregrinum	Ld-bro-e
NC_001973.1_NP_047710.1	AF-A0A6I2AFH1-F1-model_v4	0.002382	130	0.6163	1	0.5903	Acinetobacter baumannii	Ld-bro-e
NC_001973.1_NP_047710.1	AF-A0A7H2X7D6-F1-model_v4	0.002534	130	0.6166	1	0.5926	Acinetobacter seifertii	Ld-bro-e
NC_001973.1_NP_047710.1	AF-A0A4R7MQT2-F1-model_v4	0.002695	129	0.6429	1	0.5667	Streptomyces sp. 846.5	Ld-bro-e
NC_001973.1_NP_047710.1	AF-A0A345RIY3-F1-model_v4	0.006795	129	0.6795	1	0.6202	Pseudomonas kribbensis	Ld-bro-e
NC_001973.1_NP_047710.1	AF-A0A7C9F098-F1-model_v4	0.006389	128	0.6775	1	0.603	Acetobacter senegalensis	Ld-bro-e
NC_001973.1_NP_047710.1	AF-J1FAT9-F1-model_v4	0.008696	128	0.6689	1	0.6418	Thiovulum sp. ES	Ld-bro-e
NC_001973.1_NP_047710.1	AF-A0A4U7JKE0-F1-model_v4	0.003242	128	0.6229	1	0.5881	Ruminiclostridium herbifermentans	Ld-bro-e
NC_001973.1_NP_047710.1	AF-A0A7R6V9U5-F1-model_v4	0.006389	128	0.6501	1	0.6333	Nitratiruptor sp. YY08-13	Ld-bro-e
NC_001973.1_NP_047710.1	AF-A0A1G7AI56-F1-model_v4	0.007687	128	0.6577	1	0.6399	Peptococcus niger	Ld-bro-e
NC_001973.1_NP_047710.1	AF-A0A349YI84-F1-model_v4	0.005648	128	0.6477	1	0.6143	Lachnospiraceae bacterium	Ld-bro-e
NC_001973.1_NP_047710.1	AF-A0A6G0ZWI1-F1-model_v4	0.004694	127	0.6377	1	0.6028	Andreprevotia sp. IGB-42	Ld-bro-e
NC_001973.1_NP_047710.1	AF-A0A1M5AV96-F1-model_v4	0.009249	127	0.6648	1	0.6465	Seinonella peptonophila	Ld-bro-e
NC_001973.1_NP_047710.1	AF-A0A6I6WHR3-F1-model_v4	0.004992	127	0.647	1	0.5986	Streptomyces sp. NHF165	Ld-bro-e
NC_001973.1_NP_047710.1	AF-A0A1G7B0H2-F1-model_v4	0.01424	126	0.7119	1	0.6385	Desulfuromonas thiophila	Ld-bro-e
NC_001973.1_NP_047710.1	AF-A0A369Z885-F1-model_v4	0.01113	126	0.7039	1	0.6135	Haemophilus parahaemolyticus	Ld-bro-e
NC_001973.1_NP_047710.1	AF-A0A370AH10-F1-model_v4	0.006007	126	0.6432	1	0.6141	Oceanispirochaeta sp. M1	Ld-bro-e
NC_001973.1_NP_047710.1	AF-A0A6A2W063-F1-model_v4	0.004149	126	0.6141	1	0.6053	Bifidobacterium apri	Ld-bro-e
NC_001973.1_NP_047710.1	AF-A0A208ZZ75-F1-model_v4	0.009249	126	0.6707	1	0.6266	Yersinia frederiksenii	Ld-bro-e
NC_001973.1_NP_047710.1	AF-A0A1A0DLN2-F1-model_v4	0.003901	125	0.628	1	0.5781	Acetobacter pasteurianus	Ld-bro-e
NC_001973.1_NP_047710.1	AF-A0A1H7JGK4-F1-model_v4	0.00531	125	0.6345	1	0.5978	Streptacidiphilus jiangxiensis	Ld-bro-e
NC_001973.1_NP_047710.1	AF-A0A2A7HVF1-F1-model_v4	0.004694	124	0.6254	1	0.5869	Bacillus cereus	Ld-bro-e
NC_001973.1_NP_047710.1	AF-A0A5J4SRX0-F1-model_v4	0.003668	124	0.6019	1	0.5846	termite gut metagenome	Ld-bro-e
NC_001973.1_NP_047710.1	AF-A0A7W9YQN8-F1-model_v4	0.009249	124	0.6473	1	0.6254	Anoxybacillus tengchongensis	Ld-bro-e
NC_001973.1_NP_047710.1	AF-A0A4Q5AK95-F1-model_v4	0.007687	124	0.6499	1	0.6072	Bifidobacterium pseudolongum subsp. globosum	Ld-bro-e
NC_001973.1_NP_047710.1	AF-A0A1I2QKV7-F1-model_v4	0.01259	124	0.6829	1	0.6297	Clostridium cadaveris	Ld-bro-e
NC_001973.1_NP_047710.1	AF-C7LPH1-F1-model_v4	0.01113	123	0.6669	1	0.6182	Desulfomicrobium baculatum DSM 4028	Ld-bro-e
NC_001973.1_NP_047710.1	AF-A0A2A4V1P2-F1-model_v4	0.01184	123	0.6742	1	0.6231	Alphaproteobacteria bacterium	Ld-bro-e
NC_001973.1_NP_047710.1	AF-A0A2V4DUI7-F1-model_v4	0.009249	122	0.6428	1	0.6101	Gilliamella apicola	Ld-bro-e
NC_001973.1_NP_047710.1	AF-A0A1Z4C0G3-F1-model_v4	0.007687	122	0.6345	1	0.599	Methylovulum psychrotolerans	Ld-bro-e
NC_001973.1_NP_047710.1	AF-A0A2N6FNR7-F1-model_v4	0.01713	122	0.6832	1	0.6406	Arcobacter sp.	Ld-bro-e
NC_001973.1_NP_047710.1	AF-A0A1E4R4Q4-F1-model_v4	0.005648	122	0.611	1	0.5934	Lysinibacillus fusiformis	Ld-bro-e
NC_001973.1_NP_047710.1	AF-A0A4Y9IXP2-F1-model_v4	0.01113	122	0.6569	1	0.6185	Barnesiella sp. WM24	Ld-bro-e
NC_001973.1_NP_047710.1	AF-A0A349YIF5-F1-model_v4	0.003242	122	0.5933	1	0.5615	Lachnospiraceae bacterium	Ld-bro-e
NC_001973.1_NP_047710.1	AF-A0A108T313-F1-model_v4	0.01515	122	0.6842	1	0.6229	Bacteroides stercoris	Ld-bro-e
NC_001973.1_NP_047710.1	AF-A0A351WNH7-F1-model_v4	0.009249	122	0.6602	1	0.6006	Verrucomicrobia bacterium	Ld-bro-e
NC_001973.1_NP_047710.1	AF-A0A2W4QGH7-F1-model_v4	0.009837	122	0.646	1	0.6131	Candidatus Methylumidiphilus alinenensis	Ld-bro-e
NC_001973.1_NP_047710.1	AF-A0A1Q4XIK6-F1-model_v4	0.01424	121	0.6689	1	0.6204	Streptomyces sp. CB03911	Ld-bro-e
NC_001973.1_NP_047710.1	AF-A0A6S7G3I6-F1-model_v4	0.01515	121	0.6658	1	0.6294	Paramuricea clavata	Ld-bro-e
NC_001973.1_NP_047710.1	AF-C6S6F2-F1-model_v4	0.01938	121	0.6863	1	0.6475	Neisseria meningitidis alpha14	Ld-bro-e
NC_001973.1_NP_047710.1	AF-A0A353GD28-F1-model_v4	0.004413	120	0.5653	1	0.5952	Rhizobium sp.	Ld-bro-e
NC_001973.1_NP_047710.1	AF-A0A0L8NS94-F1-model_v4	0.01515	120	0.6779	1	0.6107	Streptomyces griseoflavus	Ld-bro-e
NC_001973.1_NP_047710.1	AF-A0A261EQB4-F1-model_v4	0.003668	120	0.5919	1	0.5606	Pseudoscardovia suis	Ld-bro-e
NC_001973.1_NP_047710.1	AF-A0A5C5BJT8-F1-model_v4	0.01113	119	0.6303	1	0.615	Lactococcus lactis subsp. lactis	Ld-bro-e
NC_001973.1_NP_047710.1	AF-A0A209B1W3-F1-model_v4	0.008176	119	0.6239	1	0.5859	Yersinia frederiksenii	Ld-bro-e
NC_001973.1_NP_047710.1	AF-A0A127K368-F1-model_v4	0.02062	119	0.6751	1	0.6424	Thauera humireducens	Ld-bro-e
NC_001973.1_NP_047710.1	AF-A0A3N2D2M9-F1-model_v4	0.008696	119	0.6269	1	0.5925	Salana multivorans	Ld-bro-e
NC_001973.1_NP_047710.1	AF-A0A2X0JW58-F1-model_v4	0.006795	119	0.6215	1	0.5757	Streptacidiphilus pinicola	Ld-bro-e
NC_001973.1_NP_047710.1	AF-A0A0H2SJ65-F1-model_v4	0.01515	119	0.6586	1	0.6196	Marinitoga sp. 1197	Ld-bro-e
NC_001973.1_NP_047710.1	AF-A0A5J4RCS3-F1-model_v4	0.01046	119	0.6349	1	0.604	termite gut metagenome	Ld-bro-e
NC_001973.1_NP_047710.1	AF-A0A1E8RB14-F1-model_v4	0.01713	118	0.6846	1	0.597	Anaerococcus sp. HMSC065G05	Ld-bro-e
NC_001973.1_NP_047710.1	AF-A0A2B9E7Z8-F1-model_v4	0.005648	118	0.5915	1	0.5721	Bacillus cereus	Ld-bro-e
NC_001973.1_NP_047710.1	AF-A0A2W4TDM3-F1-model_v4	0.01259	118	0.6329	1	0.6099	Candidatus Methylumidiphilus alinenensis	Ld-bro-e
NC_001973.1_NP_047710.1	AF-A0A377I1I4-F1-model_v4	0.01259	118	0.6426	1	0.606	Haemophilus parahaemolyticus	Ld-bro-e
NC_001973.1_NP_047710.1	AF-A0A2T6DPM7-F1-model_v4	0.01259	118	0.6436	1	0.6089	Verrucomicrobia bacterium LW23	Ld-bro-e
NC_001973.1_NP_047710.1	AF-A0A139RII3-F1-model_v4	0.007227	118	0.6086	1	0.5824	Streptococcus oralis	Ld-bro-e
NC_001973.1_NP_047710.1	AF-A0A081R6L8-F1-model_v4	0.02062	118	0.6766	1	0.628	Streptococcus oralis	Ld-bro-e
NC_001973.1_NP_047710.1	AF-A0A0K6IXP4-F1-model_v4	0.01184	118	0.6402	1	0.5988	Tepidiphilus thermophilus	Ld-bro-e
NC_001973.1_NP_047710.1	AF-A0A7T9QAG8-F1-model_v4	0.01713	118	0.6769	1	0.608	Candidatus Peregrinibacteria bacterium	Ld-bro-e
NC_001973.1_NP_047710.1	AF-A0A367FH24-F1-model_v4	0.01184	118	0.6442	1	0.6007	Sphaerisporangium album	Ld-bro-e
NC_001973.1_NP_047710.1	AF-A0A7W7RYS8-F1-model_v4	0.02062	118	0.6577	1	0.6448	Streptosporangium album	Ld-bro-e
NC_001973.1_NP_047710.1	AF-B0VTV9-F1-model_v4	0.008696	117	0.611	1	0.5901	Acinetobacter baumannii SDF	Ld-bro-e
NC_001973.1_NP_047710.1	AF-A0A242PHG4-F1-model_v4	0.01113	117	0.6346	1	0.5921	Gilliamella sp. N-G2	Ld-bro-e
NC_001973.1_NP_047710.1	AF-A0A212K442-F1-model_v4	0.01113	117	0.6353	1	0.5854	uncultured Desulfovibrio sp.	Ld-bro-e
NC_001973.1_NP_047710.1	AF-A0A379EU59-F1-model_v4	0.01184	117	0.6253	1	0.6098	Pasteurella canis	Ld-bro-e
NC_001973.1_NP_047710.1	AF-A0A076JIV0-F1-model_v4	0.01938	117	0.6838	1	0.6076	Bifidobacterium coryneforme	Ld-bro-e
NC_001973.1_NP_047710.1	AF-V5U2M6-F1-model_v4	0.01515	117	0.6428	1	0.6131	Cronobacter malonaticus	Ld-bro-e
NC_001973.1_NP_047710.1	AF-D5AMN0-F1-model_v4	0.02984	117	0.706	1	0.6306	Rhodobacter capsulatus SB 1003	Ld-bro-e
NC_001973.1_NP_047710.1	AF-A0A1U9L3B2-F1-model_v4	0.01713	117	0.6591	1	0.617	Gluconobacter albidus	Ld-bro-e
NC_001973.1_NP_047710.1	AF-A0A134B593-F1-model_v4	0.006389	117	0.5908	1	0.5738	Prevotella amnii	Ld-bro-e
NC_001973.1_NP_047710.1	AF-U6Q197-F1-model_v4	0.01339	116	0.6354	1	0.5933	Simonsiella muelleri ATCC 29453	Ld-bro-e
NC_001973.1_NP_047710.1	AF-A0A7W0HM90-F1-model_v4	0.0248	116	0.6706	1	0.6332	Desulfosalsimonas propionicica	Ld-bro-e
NC_001973.1_NP_047710.1	AF-A0A4S2FP66-F1-model_v4	0.02193	116	0.6684	1	0.6187	Phocaeicola sartorii	Ld-bro-e
NC_001973.1_NP_047710.1	AF-A0A0D6N7R0-F1-model_v4	0.004694	116	0.5813	1	0.5461	Acetobacter cibinongensis	Ld-bro-e
NC_001973.1_NP_047710.1	AF-A0A7Y4JMQ3-F1-model_v4	0.01184	116	0.6303	1	0.5891	Myxococcus xanthus	Ld-bro-e
NC_001973.1_NP_047710.1	AF-A0A3C1HKA9-F1-model_v4	0.01113	116	0.623	1	0.5922	Alcanivorax sp.	Ld-bro-e
NC_001973.1_NP_047710.1	AF-A0A418VWZ1-F1-model_v4	0.009837	116	0.6274	1	0.5718	Azospirillum cavernae	Ld-bro-e
NC_001973.1_NP_047710.1	AF-A0A286EYR2-F1-model_v4	0.02332	116	0.701	1	0.5942	Streptomyces sp. 1222.2	Ld-bro-e
NC_001973.1_NP_047710.1	AF-K1UFX4-F1-model_v4	0.02332	115	0.6647	1	0.6168	human gut metagenome	Ld-bro-e
NC_001973.1_NP_047710.1	AF-A0A2A4RT31-F1-model_v4	0.02193	115	0.677	1	0.6026	Flavobacteriaceae bacterium	Ld-bro-e
NC_001973.1_NP_047710.1	AF-A0A379ANC6-F1-model_v4	0.01184	115	0.6122	1	0.5991	Avibacterium avium	Ld-bro-e
NC_001973.1_NP_047710.1	AF-A0A7Z0VSA2-F1-model_v4	0.01515	115	0.6282	1	0.6046	Actinomyces sp. HMSC065F12	Ld-bro-e
NC_001973.1_NP_047710.1	AF-A0A1X3A2C2-F1-model_v4	0.01424	115	0.6503	1	0.5783	Bifidobacterium adolescentis	Ld-bro-e
NC_001973.1_NP_047710.1	AF-A0A7Y9QX63-F1-model_v4	0.02984	115	0.6723	1	0.6398	Sphaerotilus montanus	Ld-bro-e
NC_001973.1_NP_047710.1	AF-Q5F7T5-F1-model_v4	0.03819	115	0.681	1	0.6581	Neisseria gonorrhoeae FA 1090	Ld-bro-e
NC_001973.1_NP_047710.1	AF-A0A4Y7QV80-F1-model_v4	0.008176	114	0.6055	1	0.562	Bacillus sp. BH2	Ld-bro-e
NC_001973.1_NP_047710.1	AF-A0A7C6PCK8-F1-model_v4	0.02193	114	0.6567	1	0.6093	Rhodocyclaceae bacterium	Ld-bro-e
NC_001973.1_NP_047710.1	AF-A0A844GAG1-F1-model_v4	0.02638	114	0.6662	1	0.6189	Paludibacterium denitrificans	Ld-bro-e
NC_001973.1_NP_047710.1	AF-A0A1Y1QXK7-F1-model_v4	0.02984	114	0.6771	1	0.623	Thiothrix lacustris	Ld-bro-e
NC_001973.1_NP_047710.1	AF-A0A7C6K539-F1-model_v4	0.01822	114	0.6498	1	0.5951	Tissierellia bacterium	Ld-bro-e
NC_001973.1_NP_047710.1	AF-A0A292YBU0-F1-model_v4	0.0248	114	0.6538	1	0.6227	Lebetimonas natsushimae	Ld-bro-e
NC_001973.1_NP_047710.1	AF-A0A653K236-F1-model_v4	0.006389	114	0.5725	1	0.569	Acinetobacter proteolyticus	Ld-bro-e
NC_001973.1_NP_047710.1	AF-A0A835Z871-F1-model_v4	0.02638	114	0.6862	1	0.5982	Tribonema minus	Ld-bro-e
NC_001973.1_NP_047710.1	AF-U2TPG4-F1-model_v4	0.01938	114	0.6398	1	0.6142	Olsenella profusa F0195	Ld-bro-e
NC_001973.1_NP_047710.1	AF-A0A3N4VXR7-F1-model_v4	0.01938	114	0.6527	1	0.6011	Vespertiliibacter pulmonis	Ld-bro-e
NC_001973.1_NP_047710.1	AF-I7JGU4-F1-model_v4	0.01713	113	0.6227	1	0.6052	Lactococcus raffinolactis 4877	Ld-bro-e
NC_001973.1_NP_047710.1	AF-A0A560IT64-F1-model_v4	0.01938	113	0.6472	1	0.5914	Nitrospirillum amazonense	Ld-bro-e
NC_001973.1_NP_047710.1	AF-A0A1V1X3R4-F1-model_v4	0.01113	113	0.6087	1	0.5732	Desulfobacterales bacterium PC51MH44	Ld-bro-e
NC_001973.1_NP_047710.1	AF-A0A7V8SK87-F1-model_v4	0.01713	113	0.6214	1	0.6055	Lactococcus laudensis	Ld-bro-e
NC_001973.1_NP_047710.1	AF-A0A2S1Z287-F1-model_v4	0.02806	113	0.6722	1	0.617	Streptomyces spongiicola	Ld-bro-e
NC_001973.1_NP_047710.1	AF-A0A354UAZ4-F1-model_v4	0.02806	113	0.6495	1	0.6289	Lentisphaeria bacterium	Ld-bro-e
NC_001973.1_NP_047710.1	AF-A0A4P6F327-F1-model_v4	0.01611	113	0.6284	1	0.5874	Xylanimonas protaetiae	Ld-bro-e
NC_001973.1_NP_047710.1	AF-A0A6C0E2K0-F1-model_v4	0.00531	113	0.5874	1	0.5279	viral metagenome	Ld-bro-e
NC_001973.1_NP_047710.1	AF-A0A853EMH5-F1-model_v4	0.02332	112	0.6324	1	0.6151	Actinomyces bowdenii	Ld-bro-e
NC_001973.1_NP_047710.1	AF-A0A074LI19-F1-model_v4	0.02062	112	0.6368	1	0.596	Tumebacillus flagellatus	Ld-bro-e
NC_001973.1_NP_047710.1	AF-A0A849CQQ7-F1-model_v4	0.01713	112	0.6306	1	0.5836	Pasteurella multocida	Ld-bro-e
NC_001973.1_NP_047710.1	AF-A0A5J4RDU8-F1-model_v4	0.01822	112	0.6342	1	0.593	termite gut metagenome	Ld-bro-e
NC_001973.1_NP_047710.1	AF-A0A143XX02-F1-model_v4	0.03591	112	0.671	1	0.6337	Alistipes sp. CHKCI003	Ld-bro-e
NC_001973.1_NP_047710.1	AF-F5LC85-F1-model_v4	0.02193	112	0.6366	1	0.603	Paenibacillus sp. HGF7	Ld-bro-e
NC_001973.1_NP_047710.1	AF-E3I797-F1-model_v4	0.009837	112	0.5849	1	0.5742	Rhodomicrobium vannielii ATCC 17100	Ld-bro-e
NC_001973.1_NP_047710.1	AF-K0NII2-F1-model_v4	0.01822	112	0.6231	1	0.5982	Desulfobacula toluolica Tol2	Ld-bro-e
NC_001973.1_NP_047710.1	AF-A0A3A8RV66-F1-model_v4	0.0248	112	0.6358	1	0.6161	Corallococcus sp. AB032C	Ld-bro-e
NC_001973.1_NP_047710.1	AF-A0A162J7K9-F1-model_v4	0.01713	112	0.61	1	0.6085	Clostridium ljungdahlii	Ld-bro-e
NC_001973.1_NP_047710.1	AF-E0ULX5-F1-model_v4	0.01713	112	0.6239	1	0.5916	Gloeothece verrucosa PCC 7822	Ld-bro-e
NC_001973.1_NP_047710.1	AF-B8IDP0-F1-model_v4	0.01184	112	0.6243	1	0.5575	Methylobacterium nodulans ORS 2060	Ld-bro-e
NC_001973.1_NP_047710.1	AF-A0A2N3KJW6-F1-model_v4	0.01339	112	0.6158	1	0.575	Thalassospira marina	Ld-bro-e
NC_001973.1_NP_047710.1	AF-A0A846FZE4-F1-model_v4	0.02332	112	0.6469	1	0.6061	Okeania sp. SIO2B3	Ld-bro-e
NC_001973.1_NP_047710.1	AF-B7GS26-F1-model_v4	0.01515	111	0.6239	1	0.5654	Bifidobacterium longum subsp. infantis ATCC 15697 = JCM 1222 = DSM 20088	Ld-bro-e
NC_001973.1_NP_047710.1	AF-A0A7U9GYY7-F1-model_v4	0.0248	111	0.6497	1	0.6025	Klebsiella pneumoniae subsp. pneumoniae KpQ3	Ld-bro-e
NC_001973.1_NP_047710.1	AF-A0A1C4CQX8-F1-model_v4	0.008696	111	0.5687	1	0.5681	Bacillus mycoides	Ld-bro-e
NC_001973.1_NP_047710.1	AF-A0A7G2K1D6-F1-model_v4	0.01713	111	0.6321	1	0.5731	Haemophilus influenzae HK1212	Ld-bro-e
NC_001973.1_NP_047710.1	AF-P44189-F1-model_v4	0.02062	111	0.626	1	0.5948	Haemophilus influenzae Rd KW20	Ld-bro-e
NC_001973.1_NP_047710.1	AF-A0A3Q9V1I6-F1-model_v4	0.03591	111	0.6672	1	0.627	Riemerella anatipestifer	Ld-bro-e
NC_001973.1_NP_047710.1	AF-E7A8J1-F1-model_v4	0.01515	111	0.6189	1	0.5772	Haemophilus influenzae F3031	Ld-bro-e
NC_001973.1_NP_047710.1	AF-A0A162J5V6-F1-model_v4	0.01713	111	0.6219	1	0.5866	Fusobacterium necrophorum subsp. funduliforme	Ld-bro-e
NC_001973.1_NP_047710.1	AF-A0A496PMU6-F1-model_v4	0.03591	111	0.6638	1	0.6278	Galactobacter caseinivorans	Ld-bro-e
NC_001973.1_NP_047710.1	AF-A0A1G8KBK6-F1-model_v4	0.03376	111	0.66	1	0.6185	Pseudomonas abietaniphila	Ld-bro-e
NC_001973.1_NP_047710.1	AF-A0A6P2FEI4-F1-model_v4	0.01046	111	0.5843	1	0.5687	Variovorax sp. PBL-E5	Ld-bro-e
NC_001973.1_NP_047710.1	AF-A0A3P3VWV5-F1-model_v4	0.0248	111	0.6459	1	0.6059	Gulosibacter macacae	Ld-bro-e
NC_001973.1_NP_047710.1	AF-A0A212KMD5-F1-model_v4	0.01822	111	0.6499	1	0.5647	uncultured Alphaproteobacteria bacterium	Ld-bro-e
NC_001973.1_NP_047710.1	AF-A0A3D1WQC5-F1-model_v4	0.01938	111	0.6297	1	0.5928	Collinsella sp.	Ld-bro-e
NC_001973.1_NP_047710.1	AF-A0A1B2I863-F1-model_v4	0.01046	110	0.595	1	0.5507	Cloacibacillus porcorum	Ld-bro-e
NC_001973.1_NP_047710.1	AF-A0A0S2S3Q4-F1-model_v4	0.02062	110	0.6311	1	0.5831	Paenibacillus sp. IHB B 3084	Ld-bro-e
NC_001973.1_NP_047710.1	AF-A0A2G0QEU9-F1-model_v4	0.02638	110	0.6387	1	0.6084	Xenorhabdus hominickii	Ld-bro-e
NC_001973.1_NP_047710.1	AF-J7Y9B4-F1-model_v4	0.01713	110	0.6191	1	0.5737	Bacillus cereus BAG6X1-2	Ld-bro-e
NC_001973.1_NP_047710.1	AF-A0A317HFI2-F1-model_v4	0.02984	110	0.6707	1	0.5917	Bacteroidetes bacterium	Ld-bro-e
NC_001973.1_NP_047710.1	AF-A0A6P2EY57-F1-model_v4	0.0248	110	0.629	1	0.6102	Variovorax sp. PBL-E5	Ld-bro-e
NC_001973.1_NP_047710.1	AF-A0A0R2BJB7-F1-model_v4	0.03591	110	0.6507	1	0.6259	Ligilactobacillus murinus DSM 20452 = NBRC 14221	Ld-bro-e
NC_001973.1_NP_047710.1	AF-A0A2E2NLD1-F1-model_v4	0.0248	110	0.6376	1	0.6011	Citromicrobium sp.	Ld-bro-e
NC_001973.1_NP_047710.1	AF-A0A1J7C7N8-F1-model_v4	0.02193	110	0.6321	1	0.5943	Sodalis sp. TME1	Ld-bro-e
NC_001973.1_NP_047710.1	AF-A0A822VLV8-F1-model_v4	0.01611	110	0.6151	1	0.5789	Streptococcus suis	Ld-bro-e
NC_001973.1_NP_047710.1	AF-A0A1N7B2Z5-F1-model_v4	0.0432	110	0.6799	1	0.6265	Pseudomonas sp. A214	Ld-bro-e
NC_001973.1_NP_047710.1	AF-A0A087B4G2-F1-model_v4	0.02638	110	0.6364	1	0.604	Bifidobacterium cuniculi	Ld-bro-e
NC_001973.1_NP_047710.1	AF-R4UQA1-F1-model_v4	0.02806	110	0.6427	1	0.6028	Mycobacteroides abscessus subsp. bolletii 50594	Ld-bro-e
NC_001973.1_NP_047710.1	AF-A0A7X0AWL1-F1-model_v4	0.007687	110	0.5791	1	0.5416	Nitrospirillum iridis	Ld-bro-e
NC_001973.1_NP_047710.1	AF-A0A417H2R4-F1-model_v4	0.01339	109	0.5956	1	0.5671	Ruminococcus sp. AM28-41	Ld-bro-e
NC_001973.1_NP_047710.1	AF-A0A2R4KFI4-F1-model_v4	0.03819	109	0.6619	1	0.6133	Tannerella serpentiformis	Ld-bro-e
NC_001973.1_NP_047710.1	AF-A0A1S9ZW52-F1-model_v4	0.03174	109	0.6474	1	0.6096	Moraxella caviae	Ld-bro-e
NC_001973.1_NP_047710.1	AF-A0A845I7Q1-F1-model_v4	0.04595	109	0.6528	1	0.6409	Ligilactobacillus salivarius	Ld-bro-e
NC_001973.1_NP_047710.1	AF-A0A7Y3JCY4-F1-model_v4	0.02806	109	0.6433	1	0.591	Burkholderiales bacterium	Ld-bro-e
NC_001973.1_NP_047710.1	AF-A0A4Q5ATV1-F1-model_v4	0.01611	109	0.6062	1	0.5713	Bifidobacterium pseudolongum subsp. globosum	Ld-bro-e
NC_001973.1_NP_047710.1	AF-A0A5C7LGM9-F1-model_v4	0.02806	109	0.6429	1	0.5947	Hyphomicrobiaceae bacterium	Ld-bro-e
NC_001973.1_NP_047710.1	AF-I0RPB5-F1-model_v4	0.05198	109	0.6788	1	0.628	Mycobacterium xenopi RIVM700367	Ld-bro-e
NC_001973.1_NP_047710.1	AF-A0A853IL73-F1-model_v4	0.03819	108	0.6611	1	0.5996	Endozoicomonas sp. SM1973	Ld-bro-e
NC_001973.1_NP_047710.1	AF-A0A7C6K7G7-F1-model_v4	0.03819	108	0.6513	1	0.6148	Tissierellia bacterium	Ld-bro-e
NC_001973.1_NP_047710.1	AF-A0A4Y5W3H0-F1-model_v4	0.01938	108	0.5916	1	0.599	Pseudomonas psychrotolerans	Ld-bro-e
NC_001973.1_NP_047710.1	AF-A0A2A2GZU5-F1-model_v4	0.02806	108	0.6287	1	0.5972	Arsenophonus sp. ENCA	Ld-bro-e
NC_001973.1_NP_047710.1	AF-A0A523PXM3-F1-model_v4	0.02193	108	0.6209	1	0.5816	Flavobacteriaceae bacterium	Ld-bro-e
NC_001973.1_NP_047710.1	AF-A0A049DR96-F1-model_v4	0.05529	108	0.6817	1	0.6273	Mycobacterium avium XTB13-223	Ld-bro-e
NC_001973.1_NP_047710.1	AF-W1V4J3-F1-model_v4	0.01822	108	0.6098	1	0.5671	Actinomyces urogenitalis DORA_12	Ld-bro-e
NC_001973.1_NP_047710.1	AF-A0A840J7U2-F1-model_v4	0.02638	108	0.6274	1	0.5898	Amycolatopsis jiangsuensis	Ld-bro-e
NC_001973.1_NP_047710.1	AF-A0A2W1LAP2-F1-model_v4	0.03819	108	0.6535	1	0.6055	Paenibacillus sambharensis	Ld-bro-e
NC_001973.1_NP_047710.1	AF-A0A837STH3-F1-model_v4	0.01938	108	0.6012	1	0.589	Lactococcus lactis subsp. lactis	Ld-bro-e
NC_001973.1_NP_047710.1	AF-A0A3S9QGD3-F1-model_v4	0.02062	108	0.617	1	0.5718	Moraxella catarrhalis	Ld-bro-e
NC_001973.1_NP_047710.1	AF-L8MKU5-F1-model_v4	0.02984	108	0.6369	1	0.5924	Pseudomonas furukawaii	Ld-bro-e
NC_001973.1_NP_047710.1	AF-A0A076JHV9-F1-model_v4	0.009837	108	0.5695	1	0.553	Bifidobacterium coryneforme	Ld-bro-e
NC_001973.1_NP_047710.1	AF-G1UXI1-F1-model_v4	0.03174	108	0.6385	1	0.6019	Desulfovibrio sp. 6_1_46AFAA	Ld-bro-e
NC_001973.1_NP_047710.1	AF-A0A6C0AD22-F1-model_v4	0.03376	108	0.6251	1	0.6186	viral metagenome	Ld-bro-e
NC_001973.1_NP_047710.1	AF-A0A6I0F0A0-F1-model_v4	0.02984	107	0.6242	1	0.5946	Alkaliphilus pronyensis	Ld-bro-e
NC_001973.1_NP_047710.1	AF-A0A7K1KFU3-F1-model_v4	0.05529	107	0.7205	1	0.5783	Mycolicibacterium sp. CBMA 247	Ld-bro-e
NC_001973.1_NP_047710.1	AF-A0A1B6JEL2-F1-model_v4	0.06254	107	0.7328	1	0.5841	Homalodisca liturata	Ld-bro-e
NC_001973.1_NP_047710.1	AF-A0A069CW56-F1-model_v4	0.02638	107	0.6125	1	0.5938	Weissella oryzae SG25	Ld-bro-e
NC_001973.1_NP_047710.1	AF-A0A3D9XGT9-F1-model_v4	0.03819	107	0.6665	1	0.5836	Paracoccus versutus	Ld-bro-e
NC_001973.1_NP_047710.1	AF-A0A143PY43-F1-model_v4	0.02638	107	0.5987	1	0.6041	Limosilactobacillus reuteri	Ld-bro-e
NC_001973.1_NP_047710.1	AF-A0A645B0S7-F1-model_v4	0.02984	107	0.6391	1	0.5826	bioreactor metagenome	Ld-bro-e
NC_001973.1_NP_047710.1	AF-K4Z6W6-F1-model_v4	0.0432	107	0.6486	1	0.6208	Paenibacillus alvei DSM 29	Ld-bro-e
NC_001973.1_NP_047710.1	AF-A0A0U4FGS5-F1-model_v4	0.02062	107	0.6064	1	0.5763	Lentibacillus amyloliquefaciens	Ld-bro-e
NC_001973.1_NP_047710.1	AF-A0A4R3RFR0-F1-model_v4	0.02062	107	0.6005	1	0.5817	Streptomyces sp. BK215	Ld-bro-e
NC_001973.1_NP_047710.1	AF-A0A7K0KIP5-F1-model_v4	0.03819	107	0.6374	1	0.6113	Prevotella mizrahii	Ld-bro-e
NC_001973.1_NP_047710.1	AF-A0A1U0U4Q6-F1-model_v4	0.02806	107	0.6185	1	0.5918	Mycobacteroides abscessus subsp. massiliense	Ld-bro-e
NC_001973.1_NP_047710.1	AF-D2Z3R5-F1-model_v4	0.05529	107	0.6721	1	0.6227	Dethiosulfovibrio peptidovorans DSM 11002	Ld-bro-e
NC_001973.1_NP_047710.1	AF-L2F815-F1-model_v4	0.02806	106	0.6128	1	0.5886	Moraxella macacae 0408225	Ld-bro-e
NC_001973.1_NP_047710.1	AF-T3DQ89-F1-model_v4	0.02638	106	0.6434	1	0.5606	Clostridioides difficile CD160	Ld-bro-e
NC_001973.1_NP_047710.1	AF-A0A0F2IYZ1-F1-model_v4	0.02806	106	0.6229	1	0.5855	Candidatus Magnetoovum chiemensis	Ld-bro-e
NC_001973.1_NP_047710.1	AF-A0A139BN22-F1-model_v4	0.03174	106	0.6285	1	0.5838	Candidatus Gallionella acididurans	Ld-bro-e
NC_001973.1_NP_047710.1	AF-A0A378R9G9-F1-model_v4	0.04887	106	0.6516	1	0.6121	Moraxella caviae	Ld-bro-e
NC_001973.1_NP_047710.1	AF-A0A7M1PZ62-F1-model_v4	0.02984	106	0.6242	1	0.5915	Clostridium sp. 'deep sea'	Ld-bro-e
NC_001973.1_NP_047710.1	AF-H6LF41-F1-model_v4	0.02062	106	0.5971	1	0.5745	Acetobacterium woodii DSM 1030	Ld-bro-e
NC_001973.1_NP_047710.1	AF-A0A510IYB8-F1-model_v4	0.01424	106	0.5819	1	0.5553	Microbulbifer sp. GL-2	Ld-bro-e
NC_001973.1_NP_047710.1	AF-K9TRN0-F1-model_v4	0.02638	106	0.6139	1	0.582	Oscillatoria acuminata PCC 6304	Ld-bro-e
NC_001973.1_NP_047710.1	AF-A0A2G3Q2X9-F1-model_v4	0.02806	106	0.6229	1	0.5836	Lachnospiraceae bacterium	Ld-bro-e
NC_001973.1_NP_047710.1	AF-A0A7M3MHS9-F1-model_v4	0.04595	106	0.6563	1	0.6096	Oceanidesulfovibrio indonesiensis	Ld-bro-e
NC_001973.1_NP_047710.1	AF-A0A2E3FFM9-F1-model_v4	0.01822	106	0.594	1	0.5688	Rhodobacteraceae bacterium	Ld-bro-e
NC_001973.1_NP_047710.1	AF-A0A2G4AY12-F1-model_v4	0.03174	106	0.6191	1	0.5966	Vibrio splendidus	Ld-bro-e
NC_001973.1_NP_047710.1	AF-A0A7W4NIS2-F1-model_v4	0.03376	106	0.6265	1	0.5999	Gluconacetobacter diazotrophicus	Ld-bro-e
NC_001973.1_NP_047710.1	AF-A0A380QB92-F1-model_v4	0.05198	106	0.6603	1	0.614	Yersinia pseudotuberculosis	Ld-bro-e
NC_001973.1_NP_047710.1	AF-A0A6C0H430-F1-model_v4	0.01259	106	0.5907	1	0.5359	viral metagenome	Ld-bro-e
NC_001973.1_NP_047710.1	AF-A0A133YZQ0-F1-model_v4	0.03591	105	0.6776	1	0.5482	Tissierellia bacterium KA00581	Ld-bro-e
NC_001973.1_NP_047710.1	AF-A0A854YV35-F1-model_v4	0.04595	105	0.6398	1	0.6082	Bacillus thuringiensis	Ld-bro-e
NC_001973.1_NP_047710.1	AF-A0A437M126-F1-model_v4	0.02062	105	0.5887	1	0.5721	Sphingomonas crocodyli	Ld-bro-e
NC_001973.1_NP_047710.1	AF-C1D862-F1-model_v4	0.04062	105	0.6507	1	0.5866	Laribacter hongkongensis HLHK9	Ld-bro-e
NC_001973.1_NP_047710.1	AF-A0A1V5UE70-F1-model_v4	0.02332	105	0.6032	1	0.5682	Lentisphaerae bacterium ADurb.Bin242	Ld-bro-e
NC_001973.1_NP_047710.1	AF-A0A4R6LE49-F1-model_v4	0.03174	105	0.6117	1	0.5906	Halanaerobium saccharolyticum	Ld-bro-e
NC_001973.1_NP_047710.1	AF-A0A318QC26-F1-model_v4	0.03819	105	0.6446	1	0.5815	Gluconacetobacter entanii	Ld-bro-e
NC_001973.1_NP_047710.1	AF-A0A7K3NKE2-F1-model_v4	0.03819	105	0.641	1	0.5923	Desulfovibrio sulfodismutans	Ld-bro-e
NC_001973.1_NP_047710.1	AF-A0A502FUK1-F1-model_v4	0.0432	105	0.6427	1	0.5946	Roseomonas nepalensis	Ld-bro-e
NC_001973.1_NP_047710.1	AF-A0A6B9T2E4-F1-model_v4	0.03591	105	0.6407	1	0.5812	Klebsiella pneumoniae	Ld-bro-e
NC_001973.1_NP_047710.1	AF-A0A854NLV4-F1-model_v4	0.0588	105	0.655	1	0.6291	Corynebacterium diphtheriae bv. mitis	Ld-bro-e
NC_001973.1_NP_047710.1	AF-A0A2A2R0W3-F1-model_v4	0.04595	105	0.6483	1	0.6059	Verrucomicrobia bacterium Tous-C9LFEB	Ld-bro-e
NC_001973.1_NP_047710.1	AF-A0A3E1DNP3-F1-model_v4	0.01713	105	0.575	1	0.5702	Candidatus Nitrotoga sp. LAW	Ld-bro-e
NC_001973.1_NP_047710.1	AF-A0A839RTU9-F1-model_v4	0.03376	105	0.6166	1	0.6008	Hoyosella altamirensis	Ld-bro-e
NC_001973.1_NP_047710.1	AF-A0A496KL12-F1-model_v4	0.03376	105	0.6137	1	0.5989	Alloprevotella sp.	Ld-bro-e
NC_001973.1_NP_047710.1	AF-A0A1B0A2R3-F1-model_v4	0.02984	105	0.6178	1	0.579	Glossina pallidipes	Ld-bro-e
NC_001973.1_NP_047710.1	AF-A0A1C0V8I8-F1-model_v4	0.02193	105	0.5957	1	0.5696	Limnothrix sp. P13C2	Ld-bro-e
NC_001973.1_NP_047710.1	AF-A0A7W4NJK5-F1-model_v4	0.03591	105	0.6245	1	0.5971	Gluconacetobacter sacchari	Ld-bro-e
NC_001973.1_NP_047710.1	AF-A0A6N7KUI3-F1-model_v4	0.0588	105	0.6636	1	0.6144	Streptomyces kaniharaensis	Ld-bro-e
NC_001973.1_NP_047710.1	AF-A0A100W853-F1-model_v4	0.04595	104	0.6291	1	0.6027	Mycolicibacterium canariasense	Ld-bro-e
NC_001973.1_NP_047710.1	AF-A0A398D9L5-F1-model_v4	0.02193	104	0.5877	1	0.5634	Candidatus Cryosericum hinesii	Ld-bro-e
NC_001973.1_NP_047710.1	AF-A0A8A6GUT6-F1-model_v4	0.02806	104	0.5648	1	0.6165	Escherichia coli	Ld-bro-e
NC_001973.1_NP_047710.1	AF-A0A4P8G5H3-F1-model_v4	0.01713	104	0.5486	1	0.5774	Vibrio neocaledonicus	Ld-bro-e
NC_001973.1_NP_047710.1	AF-A0A502KJC4-F1-model_v4	0.04062	104	0.635	1	0.5901	Haemophilus haemolyticus	Ld-bro-e
NC_001973.1_NP_047710.1	AF-A0A6N7S693-F1-model_v4	0.02984	104	0.6019	1	0.5806	Holdemania massiliensis	Ld-bro-e
NC_001973.1_NP_047710.1	AF-H3SBF0-F1-model_v4	0.03591	104	0.6212	1	0.5836	Paenibacillus dendritiformis C454	Ld-bro-e
NC_001973.1_NP_047710.1	AF-A0A1W2EKJ3-F1-model_v4	0.04887	104	0.6418	1	0.6022	Fulvimarina manganoxydans	Ld-bro-e
NC_001973.1_NP_047710.1	AF-A0A7H2BGE6-F1-model_v4	0.03174	104	0.6008	1	0.5941	Rothia terrae	Ld-bro-e
NC_001973.1_NP_047710.1	AF-A0A134CAB7-F1-model_v4	0.04595	104	0.6245	1	0.6121	Veillonella dispar	Ld-bro-e
NC_001973.1_NP_047710.1	AF-C9MV70-F1-model_v4	0.04595	104	0.6284	1	0.6107	Leptotrichia hofstadii F0254	Ld-bro-e
NC_001973.1_NP_047710.1	AF-A0A2Z6AIW2-F1-model_v4	0.01938	104	0.5774	1	0.5603	Sphingobium sp. YG1	Ld-bro-e
NC_001973.1_NP_047710.1	AF-A0A809QDE2-F1-model_v4	0.06652	104	0.6551	1	0.628	Corynebacterium ulcerans	Ld-bro-e
NC_001973.1_NP_047710.1	AF-A0A352TI38-F1-model_v4	0.04062	104	0.6444	1	0.5802	Ruminococcus sp.	Ld-bro-e
NC_001973.1_NP_047710.1	AF-A0A7D7LE74-F1-model_v4	0.02193	104	0.5809	1	0.5743	Nostoc edaphicum CCNP1411	Ld-bro-e
NC_001973.1_NP_047710.1	AF-A0A4R5XHP8-F1-model_v4	0.02806	104	0.6096	1	0.5682	Jeotgalibacillus sp. S-D1	Ld-bro-e
NC_001973.1_NP_047710.1	AF-A0A087AFB7-F1-model_v4	0.03174	104	0.5878	1	0.6056	Bifidobacterium choerinum	Ld-bro-e
NC_001973.1_NP_047710.1	AF-B8F4I9-F1-model_v4	0.04887	104	0.6561	1	0.5893	Glaesserella parasuis SH0165	Ld-bro-e
NC_001973.1_NP_047710.1	AF-A0A644ZHI7-F1-model_v4	0.0248	103	0.5992	1	0.5625	bioreactor metagenome	Ld-bro-e
NC_001973.1_NP_047710.1	AF-A0A1C5VWK6-F1-model_v4	0.04595	103	0.6382	1	0.5873	uncultured Ruminococcus sp.	Ld-bro-e
NC_001973.1_NP_047710.1	AF-A0A2T5J1I5-F1-model_v4	0.03819	103	0.6213	1	0.5799	Agitococcus lubricus	Ld-bro-e
NC_001973.1_NP_047710.1	AF-A0A7W8PHE2-F1-model_v4	0.05529	103	0.6507	1	0.6006	Paraburkholderia sp. HC6.4b	Ld-bro-e
NC_001973.1_NP_047710.1	AF-A0A2G4YUK4-F1-model_v4	0.09054	103	0.6968	1	0.6164	Paremcibacter congregatus	Ld-bro-e
NC_001973.1_NP_047710.1	AF-A0A327L2T6-F1-model_v4	0.08004	103	0.6889	1	0.6095	Rhodoplanes roseus	Ld-bro-e
NC_001973.1_NP_047710.1	AF-A0A4U2YR98-F1-model_v4	0.03819	103	0.6117	1	0.5923	Lysinibacillus mangiferihumi	Ld-bro-e
NC_001973.1_NP_047710.1	AF-A0A497V0F3-F1-model_v4	0.0588	103	0.6407	1	0.6104	Chryseobacterium sp. 7	Ld-bro-e
NC_001973.1_NP_047710.1	AF-A0A497CDL5-F1-model_v4	0.03591	103	0.6176	1	0.5838	Chloroflexi bacterium	Ld-bro-e
NC_001973.1_NP_047710.1	AF-C8VXR4-F1-model_v4	0.08004	103	0.7054	1	0.5972	Desulfofarcimen acetoxidans DSM 771	Ld-bro-e
NC_001973.1_NP_047710.1	AF-A0A3A6MV78-F1-model_v4	0.04887	103	0.6383	1	0.5893	Candidatus Desulforudis sp.	Ld-bro-e
NC_001973.1_NP_047710.1	AF-A0A2G6M0V7-F1-model_v4	0.07075	103	0.6591	1	0.621	Dethiosulfovibrio peptidovorans	Ld-bro-e
NC_001973.1_NP_047710.1	AF-E6W6X4-F1-model_v4	0.05529	103	0.6287	1	0.6231	Desulfurispirillum indicum S5	Ld-bro-e
NC_001973.1_NP_047710.1	AF-N8Y2R8-F1-model_v4	0.0432	102	0.6341	1	0.5775	Acinetobacter schindleri NIPH 900	Ld-bro-e
NC_001973.1_NP_047710.1	AF-S9RW97-F1-model_v4	0.06254	102	0.6519	1	0.6011	Rubellimicrobium thermophilum DSM 16684	Ld-bro-e
NC_001973.1_NP_047710.1	AF-E5BEU8-F1-model_v4	0.04595	102	0.6134	1	0.5992	Fusobacterium gonidiaformans 3-1-5R	Ld-bro-e
NC_001973.1_NP_047710.1	AF-A0A1W1YYM0-F1-model_v4	0.03591	102	0.598	1	0.5901	Papillibacter cinnamivorans DSM 12816	Ld-bro-e
NC_001973.1_NP_047710.1	AF-A0A359B3B9-F1-model_v4	0.02062	102	0.5721	1	0.5592	Desulfotomaculum sp.	Ld-bro-e
NC_001973.1_NP_047710.1	AF-A0A4R6BD09-F1-model_v4	0.04062	102	0.6118	1	0.5916	Macrococcus brunensis	Ld-bro-e
NC_001973.1_NP_047710.1	AF-A0A8B6J130-F1-model_v4	0.04595	102	0.6219	1	0.5956	Streptococcus pyogenes	Ld-bro-e
NC_001973.1_NP_047710.1	AF-A0A5M9ENM2-F1-model_v4	0.03819	102	0.6035	1	0.5839	Weissella paramesenteroides	Ld-bro-e
NC_001973.1_NP_047710.1	AF-A0A285MAA3-F1-model_v4	0.06254	102	0.6459	1	0.601	Cohaesibacter sp. ES.047	Ld-bro-e
NC_001973.1_NP_047710.1	AF-A0A2P8H689-F1-model_v4	0.06652	102	0.649	1	0.6111	Salsuginibacillus halophilus	Ld-bro-e
NC_001973.1_NP_047710.1	AF-A0A4R3B5V5-F1-model_v4	0.08513	102	0.7004	1	0.5981	Streptomyces sp. BK329	Ld-bro-e
NC_001973.1_NP_047710.1	AF-A0A416BS10-F1-model_v4	0.03376	102	0.6013	1	0.5729	Clostridium sp. AF37-7	Ld-bro-e
NC_001973.1_NP_047710.1	AF-A0A2S5HKJ2-F1-model_v4	0.0432	102	0.6307	1	0.579	Brevibacillus laterosporus	Ld-bro-e
NC_001973.1_NP_047710.1	AF-A0A2E3M701-F1-model_v4	0.06652	102	0.6468	1	0.613	Rickettsiales bacterium	Ld-bro-e
NC_001973.1_NP_047710.1	AF-A0A2W6W492-F1-model_v4	0.0588	102	0.6359	1	0.6085	Sphingobium sp.	Ld-bro-e
NC_001973.1_NP_047710.1	AF-A0A1E2WJ35-F1-model_v4	0.03376	102	0.6102	1	0.5718	Nostoc sp. KVJ20	Ld-bro-e
NC_001973.1_NP_047710.1	AF-A0A412C0G2-F1-model_v4	0.03591	102	0.6096	1	0.5764	Bacteroides sp. AF27-33	Ld-bro-e
NC_001973.1_NP_047710.1	AF-A0A210WA49-F1-model_v4	0.0248	102	0.5794	1	0.5634	Delftia sp. K82	Ld-bro-e
NC_001973.1_NP_047710.1	AF-S7U2A1-F1-model_v4	0.04887	102	0.6327	1	0.5841	Desulfovibrio sp. X2	Ld-bro-e
NC_001973.1_NP_047710.1	AF-A0A2Z5YJI5-F1-model_v4	0.0432	102	0.6004	1	0.6062	Mycobacterium marinum	Ld-bro-e
NC_001973.1_NP_047710.1	AF-A0A496V3F3-F1-model_v4	0.05198	102	0.6393	1	0.5945	Gammaproteobacteria bacterium	Ld-bro-e
NC_001973.1_NP_047710.1	AF-A0A350SU88-F1-model_v4	0.05529	101	0.6234	1	0.6023	Hydrogenophaga sp.	Ld-bro-e
NC_001973.1_NP_047710.1	AF-X6QDP2-F1-model_v4	0.05529	101	0.6211	1	0.6034	Providencia alcalifaciens F90-2004	Ld-bro-e
NC_001973.1_NP_047710.1	AF-A0A1Y6CZQ5-F1-model_v4	0.0588	101	0.6452	1	0.5861	Methylomagnum ishizawai	Ld-bro-e
NC_001973.1_NP_047710.1	AF-A0A060GZU4-F1-model_v4	0.03819	101	0.6027	1	0.5739	Xylella fastidiosa subsp. sandyi Ann-1	Ld-bro-e
NC_001973.1_NP_047710.1	AF-G1Y424-F1-model_v4	0.0588	101	0.6448	1	0.5873	Nitrospirillum amazonense Y2	Ld-bro-e
NC_001973.1_NP_047710.1	AF-A0A1V5E0R8-F1-model_v4	0.03591	101	0.6405	1	0.5402	Smithella sp. PtaU1.Bin162	Ld-bro-e
NC_001973.1_NP_047710.1	AF-A0A1G7I2Y9-F1-model_v4	0.02806	101	0.6026	1	0.5445	Rhodobacter capsulatus	Ld-bro-e
NC_001973.1_NP_047710.1	AF-A0A4R1IWV2-F1-model_v4	0.08004	101	0.6514	1	0.6146	Paraburkholderia sp. BL8N3	Ld-bro-e
NC_001973.1_NP_047710.1	AF-A0A091C9R8-F1-model_v4	0.03376	101	0.6007	1	0.5685	Streptococcus equinus JB1	Ld-bro-e
NC_001973.1_NP_047710.1	AF-A0A1V8ZYM4-F1-model_v4	0.1159	101	0.7091	1	0.6163	Saccharomonospora piscinae	Ld-bro-e
NC_001973.1_NP_047710.1	AF-A0A2S5GAL5-F1-model_v4	0.04595	101	0.6102	1	0.5924	Jeotgalibacillus proteolyticus	Ld-bro-e
NC_001973.1_NP_047710.1	AF-A0A1I4HB29-F1-model_v4	0.04595	101	0.6094	1	0.5942	Gracilibacillus orientalis	Ld-bro-e
NC_001973.1_NP_047710.1	AF-A0A2D9EKQ5-F1-model_v4	0.07525	101	0.6488	1	0.6068	Pusillimonas sp. (ex Stolz et al. 2005)	Ld-bro-e
NC_001973.1_NP_047710.1	AF-Q4QKC7-F1-model_v4	0.04062	101	0.615	1	0.5778	Haemophilus influenzae 86-028NP	Ld-bro-e
NC_001973.1_NP_047710.1	AF-A0A857FJ00-F1-model_v4	0.04887	101	0.6497	1	0.5665	Komagataeibacter xylinus	Ld-bro-e
NC_001973.1_NP_047710.1	AF-A0A1I0GBM2-F1-model_v4	0.03819	101	0.6195	1	0.5631	[Clostridium] cocleatum	Ld-bro-e
NC_001973.1_NP_047710.1	AF-A0A085JGW1-F1-model_v4	0.05529	101	0.6338	1	0.5905	Tatumella ptyseos ATCC 33301	Ld-bro-e
NC_001973.1_NP_047710.1	AF-A0A4Q0HJG7-F1-model_v4	0.0432	101	0.61	1	0.5799	Chromohalobacter salexigens	Ld-bro-e
NC_001973.1_NP_047710.1	AF-A0A060UQS1-F1-model_v4	0.04062	101	0.6237	1	0.568	Acidithiobacillus ferrivorans	Ld-bro-e
NC_001973.1_NP_047710.1	AF-K1V5T9-F1-model_v4	0.05198	100	0.6198	1	0.5874	human gut metagenome	Ld-bro-e
NC_001973.1_NP_047710.1	AF-A0A259N7P5-F1-model_v4	0.04062	100	0.601	1	0.5722	Ferrovum sp. 34-44-207	Ld-bro-e
NC_001973.1_NP_047710.1	AF-A0A355DAI6-F1-model_v4	0.07075	100	0.6533	1	0.5836	Clostridium sp.	Ld-bro-e
NC_001973.1_NP_047710.1	AF-A0A853IBM2-F1-model_v4	0.09054	100	0.6579	1	0.6148	Endozoicomonas sp. SM1973	Ld-bro-e
NC_001973.1_NP_047710.1	AF-A0A376JLB4-F1-model_v4	0.0432	100	0.5961	1	0.5855	Escherichia coli	Ld-bro-e
NC_001973.1_NP_047710.1	AF-A0A252F4X7-F1-model_v4	0.02332	100	0.5736	1	0.5442	Butyricicoccus porcorum	Ld-bro-e
NC_001973.1_NP_047710.1	AF-A0A4R2GTV4-F1-model_v4	0.07525	100	0.6488	1	0.5973	Camelimonas lactis	Ld-bro-e
NC_001973.1_NP_047710.1	AF-D1AHF4-F1-model_v4	0.04062	100	0.5969	1	0.5776	Sebaldella termitidis ATCC 33386	Ld-bro-e
NC_001973.1_NP_047710.1	AF-A0A521PQW0-F1-model_v4	0.0432	100	0.6029	1	0.5758	Sphingobium sp.	Ld-bro-e
NC_001973.1_NP_047710.1	AF-A0A4P9VF37-F1-model_v4	0.05529	100	0.6239	1	0.5866	Zooshikella ganghwensis	Ld-bro-e
NC_001973.1_NP_047710.1	AF-A0A843YYM3-F1-model_v4	0.09054	100	0.6595	1	0.618	Glaciimonas soli	Ld-bro-e
NC_001973.1_NP_047710.1	AF-A0A3C1U9W0-F1-model_v4	0.0432	100	0.5962	1	0.5809	Erysipelotrichaceae bacterium	Ld-bro-e
NC_001973.1_NP_047710.1	AF-A0A7W6RFX7-F1-model_v4	0.05198	100	0.6208	1	0.5821	Roseospira visakhapatnamensis	Ld-bro-e
NC_001973.1_NP_047710.1	AF-A0A852XRR5-F1-model_v4	0.0588	100	0.6222	1	0.5907	Microbacterium esteraromaticum	Ld-bro-e
NC_001973.1_NP_047710.1	AF-A0A3D6C983-F1-model_v4	0.05529	100	0.6273	1	0.5882	Desulfobacteraceae bacterium	Ld-bro-e
NC_001973.1_NP_047710.1	AF-A0A511HQ39-F1-model_v4	0.06254	100	0.6301	1	0.6018	Myxococcus virescens	Ld-bro-e
NC_001973.1_NP_047710.1	AF-A0A261S330-F1-model_v4	0.05198	100	0.6183	1	0.5802	Bordetella genomosp. 10	Ld-bro-e
NC_001973.1_NP_047710.1	AF-A0A1G0KT01-F1-model_v4	0.1024	100	0.6689	1	0.6246	Gammaproteobacteria bacterium RIFOXYD12_FULL_61_37	Ld-bro-e
NC_001973.1_NP_047710.1	AF-D1PGP4-F1-model_v4	0.03591	100	0.5954	1	0.5649	Prevotella copri DSM 18205	Ld-bro-e
NC_001973.1_NP_047710.1	AF-A0A166F4S0-F1-model_v4	0.05198	100	0.6203	1	0.5839	Pseudovibrio sp. WM33	Ld-bro-e
NC_001973.1_NP_047710.1	AF-A0A4Q3PAW9-F1-model_v4	0.06254	100	0.638	1	0.5895	Comamonadaceae bacterium	Ld-bro-e
NC_001973.1_NP_047710.1	AF-A0A1Q9UDK7-F1-model_v4	0.07075	100	0.6392	1	0.6061	Rhodococcus sp. CUA-806	Ld-bro-e
NC_001973.1_NP_047710.1	AF-X6QE15-F1-model_v4	0.03591	100	0.5871	1	0.5776	Providencia alcalifaciens F90-2004	Ld-bro-e
NC_001973.1_NP_047710.1	AF-A0A496V3F6-F1-model_v4	0.0963	99	0.6997	0.999	0.572	Gammaproteobacteria bacterium	Ld-bro-e
NC_001973.1_NP_047710.1	AF-A0A7U8JN31-F1-model_v4	0.07525	99	0.645	0.999	0.5958	Brucella abortus bv. 3 str. Tulya	Ld-bro-e
NC_001973.1_NP_047710.1	AF-A0A0F6TCR8-F1-model_v4	0.08513	99	0.6363	0.999	0.6139	Corynebacterium kutscheri	Ld-bro-e
NC_001973.1_NP_047710.1	AF-A0A2S9HA82-F1-model_v4	0.05529	99	0.6165	0.999	0.5812	Bacillus cereus	Ld-bro-e
NC_001973.1_NP_047710.1	AF-A0A2W4TI99-F1-model_v4	0.01938	99	0.5618	0.999	0.5287	Candidatus Methylumidiphilus alinenensis	Ld-bro-e
NC_001973.1_NP_047710.1	AF-A0A385YTM6-F1-model_v4	0.0588	99	0.6055	0.999	0.5982	Paenisporosarcina cavernae	Ld-bro-e
NC_001973.1_NP_047710.1	AF-A0A1V5D571-F1-model_v4	0.04887	99	0.5991	0.999	0.5826	Syntrophorhabdus sp. PtaU1.Bin153	Ld-bro-e
NC_001973.1_NP_047710.1	AF-A0A7M3MGU4-F1-model_v4	0.08513	99	0.6646	0.999	0.5942	Oceanidesulfovibrio indonesiensis	Ld-bro-e
NC_001973.1_NP_047710.1	AF-A0A316D7D6-F1-model_v4	0.09054	99	0.6581	0.999	0.5999	Tumebacillus permanentifrigoris	Ld-bro-e
NC_001973.1_NP_047710.1	AF-A0A1T1B6A5-F1-model_v4	0.1159	99	0.6512	0.999	0.6415	Deinococcus sp. LM3	Ld-bro-e
NC_001973.1_NP_047710.1	AF-A0A143DDE0-F1-model_v4	0.03174	99	0.5901	0.999	0.5446	Haematospirillum jordaniae	Ld-bro-e
NC_001973.1_NP_047710.1	AF-A0A8B0SF11-F1-model_v4	0.03591	99	0.5801	0.999	0.57	Thiothrix fructosivorans	Ld-bro-e
NC_001973.1_NP_047710.1	AF-A0A2M9G375-F1-model_v4	0.03591	99	0.5877	0.999	0.5611	Minwuia thermotolerans	Ld-bro-e
NC_001973.1_NP_047710.1	AF-A0A7L5AQ48-F1-model_v4	0.06254	99	0.6138	0.999	0.603	Actinomyces sp. 432	Ld-bro-e
NC_001973.1_NP_047710.1	AF-A0A370BCP4-F1-model_v4	0.03376	98	0.5979	0.999	0.5381	Streptomyces corynorhini	Ld-bro-e
NC_001973.1_NP_047710.1	AF-A0A2A2GYE6-F1-model_v4	0.08513	98	0.6279	0.999	0.6121	Arsenophonus sp. ENCA	Ld-bro-e
NC_001973.1_NP_047710.1	AF-A0A7W6C507-F1-model_v4	0.02806	98	0.559	0.999	0.5545	Rhizobium skierniewicense	Ld-bro-e
NC_001973.1_NP_047710.1	AF-A0A0M5JNV2-F1-model_v4	0.0588	98	0.6108	0.999	0.5875	Acinetobacter sp. TTH0-4	Ld-bro-e
NC_001973.1_NP_047710.1	AF-A0A380I6K4-F1-model_v4	0.05198	98	0.5957	0.999	0.5898	Staphylococcus microti	Ld-bro-e
NC_001973.1_NP_047710.1	AF-A0A8B4ETY4-F1-model_v4	0.03174	98	0.5661	0.999	0.564	Mycobacteroides abscessus subsp. abscessus	Ld-bro-e
NC_001973.1_NP_047710.1	AF-A0A0H3N227-F1-model_v4	0.05529	98	0.6445	0.999	0.5518	Clostridioides difficile CD196	Ld-bro-e
NC_001973.1_NP_047710.1	AF-A0A501WFG9-F1-model_v4	0.05198	98	0.6153	0.999	0.5687	Amaricoccus solimangrovi	Ld-bro-e
NC_001973.1_NP_047710.1	AF-A0A246F9R9-F1-model_v4	0.06254	98	0.6208	0.999	0.5766	Pseudomonas nitroreducens	Ld-bro-e
NC_001973.1_NP_047710.1	AF-A0A7W3H5L0-F1-model_v4	0.06652	98	0.6179	0.999	0.5925	Citrobacter freundii	Ld-bro-e
NC_001973.1_NP_047710.1	AF-A0A519GEH6-F1-model_v4	0.08513	98	0.6432	0.999	0.5929	Rubrivivax sp.	Ld-bro-e
NC_001973.1_NP_047710.1	AF-A0A2G7H1G2-F1-model_v4	0.07075	98	0.6332	0.999	0.5838	Deinococcus sp. UR1	Ld-bro-e
NC_001973.1_NP_047710.1	AF-A0A2W4U0D2-F1-model_v4	0.06254	98	0.6314	0.999	0.5721	Candidatus Methylumidiphilus alinenensis	Ld-bro-e
NC_001973.1_NP_047710.1	AF-A0A1I5L0X8-F1-model_v4	0.1394	98	0.6917	0.999	0.6174	Ralstonia sp. NFACC01	Ld-bro-e
NC_001973.1_NP_047710.1	AF-A0A1V5V1S1-F1-model_v4	0.0588	98	0.6216	0.999	0.5699	Lentisphaerae bacterium ADurb.Bin242	Ld-bro-e
NC_001973.1_NP_047710.1	AF-A0A4P9VQL7-F1-model_v4	0.06652	98	0.6252	0.999	0.5855	Zooshikella ganghwensis	Ld-bro-e
NC_001973.1_NP_047710.1	AF-A0A7R6Z6A7-F1-model_v4	0.08513	98	0.6388	0.999	0.5968	Mesorhizobium sp. L-2-11	Ld-bro-e
NC_001973.1_NP_047710.1	AF-A0A437KBE3-F1-model_v4	0.02193	98	0.5579	0.999	0.5349	Niallia taxi	Ld-bro-e
NC_001973.1_NP_047710.1	AF-A0A350RA37-F1-model_v4	0.05198	98	0.6018	0.999	0.5765	Acholeplasmataceae bacterium	Ld-bro-e
NC_001973.1_NP_047710.1	AF-A0A239AM70-F1-model_v4	0.07075	98	0.6225	0.999	0.5936	Anaerovirgula multivorans	Ld-bro-e
NC_001973.1_NP_047710.1	AF-A0A6G7XCJ3-F1-model_v4	0.02984	98	0.5566	0.999	0.5617	Leucobacter viscericola	Ld-bro-e
NC_001973.1_NP_047710.1	AF-A0A1V2S9A2-F1-model_v4	0.0588	98	0.611	0.999	0.5793	Bacillus sp. VT-16-64	Ld-bro-e
NC_001973.1_NP_047710.1	AF-A0A2N3L173-F1-model_v4	0.07525	98	0.6332	0.999	0.594	Thalassospira lohafexi	Ld-bro-e
NC_001973.1_NP_047710.1	AF-A0A084EWE4-F1-model_v4	0.04887	98	0.5923	0.999	0.5836	Glaesserella parasuis	Ld-bro-e
NC_001973.1_NP_047710.1	AF-A0A1M3DSQ9-F1-model_v4	0.09054	98	0.6579	0.999	0.5906	Alphaproteobacteria bacterium 43-37	Ld-bro-e
NC_001973.1_NP_047710.1	AF-A0A059KKR3-F1-model_v4	0.07525	98	0.6206	0.999	0.5971	Sphaerotilus natans subsp. natans DSM 6575	Ld-bro-e
NC_001973.1_NP_047710.1	AF-A0A2U8VY78-F1-model_v4	0.05198	98	0.6076	0.999	0.5704	Methylobacterium radiodurans	Ld-bro-e
NC_001973.1_NP_047710.1	AF-A0A4V2EL01-F1-model_v4	0.1577	98	0.7247	0.999	0.608	Amycolatopsis suaedae	Ld-bro-e
NC_001973.1_NP_047710.1	AF-A0A379CDI9-F1-model_v4	0.04595	98	0.5957	0.999	0.5715	Peptostreptococcus anaerobius	Ld-bro-e
NC_001973.1_NP_047710.1	AF-A0A2W4QMX9-F1-model_v4	0.08513	98	0.6251	0.999	0.6151	Candidatus Methylumidiphilus alinenensis	Ld-bro-e
NC_001973.1_NP_047710.1	AF-A0A7G2JZA9-F1-model_v4	0.07525	97	0.6466	0.999	0.572	Haemophilus influenzae HK1212	Ld-bro-e
NC_001973.1_NP_047710.1	AF-A0A6N6TAJ0-F1-model_v4	0.06652	97	0.6136	0.999	0.5791	Candidatus Contendobacter sp.	Ld-bro-e
NC_001973.1_NP_047710.1	AF-A0A1W9WLC4-F1-model_v4	0.1232	97	0.7013	0.999	0.5811	Beggiatoa sp. 4572_84	Ld-bro-e
NC_001973.1_NP_047710.1	AF-Q57D53-F1-model_v4	0.06652	97	0.6179	0.999	0.5847	Brucella abortus bv. 1 str. 9-941	Ld-bro-e
NC_001973.1_NP_047710.1	AF-A0A433J1B8-F1-model_v4	0.1024	97	0.6557	0.999	0.6014	Azospirillum doebereinerae	Ld-bro-e
NC_001973.1_NP_047710.1	AF-A0A6P1ZLB0-F1-model_v4	0.08004	97	0.6487	0.999	0.5783	Oceanidesulfovibrio marinus	Ld-bro-e
NC_001973.1_NP_047710.1	AF-A0A6S7H5I0-F1-model_v4	0.02984	97	0.5832	0.999	0.5311	Paramuricea clavata	Ld-bro-e
NC_001973.1_NP_047710.1	AF-A0A261S327-F1-model_v4	0.02806	97	0.5675	0.999	0.5375	Bordetella genomosp. 10	Ld-bro-e
NC_001973.1_NP_047710.1	AF-A0A7Y0R6D7-F1-model_v4	0.04887	97	0.6133	0.999	0.5444	Clostridioides difficile	Ld-bro-e
NC_001973.1_NP_047710.1	AF-H2JEX6-F1-model_v4	0.04887	97	0.5932	0.999	0.5653	Clostridium sp. BNL1100	Ld-bro-e
NC_001973.1_NP_047710.1	AF-Q3JTQ5-F1-model_v4	0.07075	97	0.6155	0.999	0.591	Burkholderia pseudomallei 1710b	Ld-bro-e
NC_001973.1_NP_047710.1	AF-A0A433WUL4-F1-model_v4	0.02062	97	0.5413	0.999	0.5294	Asaia sp. W19	Ld-bro-e
NC_001973.1_NP_047710.1	AF-A0A6S4V5J0-F1-model_v4	0.0588	97	0.6082	0.999	0.5706	Aeromonas veronii	Ld-bro-e
NC_001973.1_NP_047710.1	AF-A0A850DWW7-F1-model_v4	0.07525	97	0.6153	0.999	0.5904	Curtobacterium albidum	Ld-bro-e
NC_001973.1_NP_047710.1	AF-A0A418L3U1-F1-model_v4	0.08513	97	0.6354	0.999	0.5955	Mycobacteroides abscessus	Ld-bro-e
NC_001973.1_NP_047710.1	AF-A0A3R8W4E1-F1-model_v4	0.0963	97	0.6559	0.999	0.584	Pseudomonas oleovorans	Ld-bro-e
NC_001973.1_NP_047710.1	AF-A0A010RU49-F1-model_v4	0.1677	97	0.7101	0.999	0.6134	Pseudomonas fluorescens HK44	Ld-bro-e
NC_001973.1_NP_047710.1	AF-B7J821-F1-model_v4	0.04595	97	0.5809	0.999	0.5726	Acidithiobacillus ferrooxidans ATCC 23270	Ld-bro-e
NC_001973.1_NP_047710.1	AF-A0A7K1M1D0-F1-model_v4	0.06652	97	0.6229	0.999	0.5704	Prevotella copri	Ld-bro-e
NC_001973.1_NP_047710.1	AF-A0A3S9JEH6-F1-model_v4	0.05198	97	0.6022	0.999	0.5689	Acidipropionibacterium acidipropionici	Ld-bro-e
NC_001973.1_NP_047710.1	AF-A0A6I3SM33-F1-model_v4	0.1483	97	0.6907	0.999	0.6085	Heliobacterium mobile	Ld-bro-e
NC_001973.1_NP_047710.1	AF-A0A2E0LHP6-F1-model_v4	0.1159	96	0.6891	0.999	0.5681	Porticoccaceae bacterium	Ld-bro-e
NC_001973.1_NP_047710.1	AF-A0A7W7NGM4-F1-model_v4	0.09054	96	0.6253	0.999	0.5953	Pseudomonas alcaligenes	Ld-bro-e
NC_001973.1_NP_047710.1	AF-A0A4P5VGH7-F1-model_v4	0.06652	96	0.6131	0.999	0.577	Cyanobium sp.	Ld-bro-e
NC_001973.1_NP_047710.1	AF-A0A415VBY0-F1-model_v4	0.02332	96	0.5634	0.999	0.5095	Prevotella sp. AM23-5	Ld-bro-e
NC_001973.1_NP_047710.1	AF-A0A5J4SM01-F1-model_v4	0.06254	96	0.5957	0.999	0.5766	termite gut metagenome	Ld-bro-e
NC_001973.1_NP_047710.1	AF-A0A366EUQ7-F1-model_v4	0.05198	96	0.602	0.999	0.5557	Roseiarcus fermentans	Ld-bro-e
NC_001973.1_NP_047710.1	AF-A0A0C7QU06-F1-model_v4	0.05529	96	0.5955	0.999	0.5649	Paeniclostridium sordellii	Ld-bro-e
NC_001973.1_NP_047710.1	AF-A0A135YZ97-F1-model_v4	0.08513	96	0.6235	0.999	0.5856	Peptostreptococcus anaerobius	Ld-bro-e
NC_001973.1_NP_047710.1	AF-A0A1Y0GYE4-F1-model_v4	0.06254	96	0.612	0.999	0.5661	Armatimonadetes bacterium Uphvl-Ar1	Ld-bro-e
NC_001973.1_NP_047710.1	AF-A0A5M8P307-F1-model_v4	0.0588	96	0.6015	0.999	0.568	Candidatus Ordinivivax streblomastigis	Ld-bro-e
NC_001973.1_NP_047710.1	AF-A0A6I3SM15-F1-model_v4	0.1577	96	0.7062	0.999	0.5928	Heliobacterium mobile	Ld-bro-e
NC_001973.1_NP_047710.1	AF-A0A838AAK9-F1-model_v4	0.1577	96	0.7008	0.999	0.6021	Haloechinothrix aidingensis	Ld-bro-e
NC_001973.1_NP_047710.1	AF-A0A7W7RQC1-F1-model_v4	0.1024	96	0.6526	0.999	0.5902	Lipingzhangella halophila	Ld-bro-e
NC_001973.1_NP_047710.1	AF-R6URN8-F1-model_v4	0.03819	96	0.5672	0.999	0.5534	Erysipelotrichaceae bacterium CAG:64	Ld-bro-e
NC_001973.1_NP_047710.1	AF-A0A496NRZ2-F1-model_v4	0.1483	96	0.6797	0.999	0.6152	Lachnospiraceae bacterium	Ld-bro-e
NC_001973.1_NP_047710.1	AF-A0A291BL07-F1-model_v4	0.1024	96	0.633	0.999	0.6051	Brevibacillus brevis X23	Ld-bro-e
NC_001973.1_NP_047710.1	AF-A0A419G232-F1-model_v4	0.07075	96	0.6184	0.999	0.5683	Peptococcaceae bacterium	Ld-bro-e
NC_001973.1_NP_047710.1	AF-A0A2X5NQP4-F1-model_v4	0.1089	96	0.6437	0.999	0.5964	Tatumella ptyseos	Ld-bro-e
NC_001973.1_NP_047710.1	AF-A0A417B8G4-F1-model_v4	0.01113	96	0.5192	0.999	0.4852	Ruminococcus sp. AM45-2	Ld-bro-e
NC_001973.1_NP_047710.1	AF-A0A2H2YBI0-F1-model_v4	0.07075	95	0.6029	0.998	0.572	Calothrix sp. NIES-4071	Ld-bro-e
NC_001973.1_NP_047710.1	AF-A0A832U6N9-F1-model_v4	0.1232	95	0.645	0.998	0.6037	Candidatus Methanofastidiosum sp.	Ld-bro-e
NC_001973.1_NP_047710.1	AF-A0A6S6PE40-F1-model_v4	0.08513	95	0.6242	0.998	0.5741	Acetobacter aceti	Ld-bro-e
NC_001973.1_NP_047710.1	AF-A0A853IED3-F1-model_v4	0.1483	95	0.6608	0.998	0.615	Endozoicomonas sp. SM1973	Ld-bro-e
NC_001973.1_NP_047710.1	AF-A3DI85-F1-model_v4	0.0432	95	0.5754	0.998	0.5486	Acetivibrio thermocellus ATCC 27405	Ld-bro-e
NC_001973.1_NP_047710.1	AF-A0A7U0U745-F1-model_v4	0.07525	95	0.6068	0.998	0.5761	Cutibacterium avidum	Ld-bro-e
NC_001973.1_NP_047710.1	AF-A0A6G7Z0B9-F1-model_v4	0.03376	95	0.5586	0.998	0.5406	Sanguibacter sp. HDW7	Ld-bro-e
NC_001973.1_NP_047710.1	AF-A0A645DMT7-F1-model_v4	0.0588	95	0.589	0.998	0.565	bioreactor metagenome	Ld-bro-e
NC_001973.1_NP_047710.1	AF-A0A061P340-F1-model_v4	0.07525	95	0.6079	0.998	0.5746	Geomicrobium sp. JCM 19039	Ld-bro-e
NC_001973.1_NP_047710.1	AF-A0A3N6FK11-F1-model_v4	0.1159	95	0.6497	0.998	0.5909	Streptomyces sp. ADI96-02	Ld-bro-e
NC_001973.1_NP_047710.1	AF-A0A412QSJ3-F1-model_v4	0.1089	95	0.6321	0.998	0.602	Parabacteroides distasonis	Ld-bro-e
NC_001973.1_NP_047710.1	AF-A0A1V4XV34-F1-model_v4	0.07525	95	0.6201	0.998	0.5628	Syntrophus sp. PtaB.Bin138	Ld-bro-e
NC_001973.1_NP_047710.1	AF-A0A6N9PWW5-F1-model_v4	0.08004	95	0.6144	0.998	0.5846	Neglectibacter sp. 59	Ld-bro-e
NC_001973.1_NP_047710.1	AF-A0A2S5KT29-F1-model_v4	0.08004	95	0.6337	0.998	0.5595	Proteobacteria bacterium 228	Ld-bro-e
NC_001973.1_NP_047710.1	AF-A0A853IJK0-F1-model_v4	0.1394	94	0.6507	0.998	0.6068	Endozoicomonas sp. SM1973	Ld-bro-e
NC_001973.1_NP_047710.1	AF-A0A4R2NAR3-F1-model_v4	0.1159	94	0.6487	0.998	0.576	Nicoletella semolina	Ld-bro-e
NC_001973.1_NP_047710.1	AF-A0A2M8USY2-F1-model_v4	0.08513	94	0.6227	0.998	0.5681	Pseudomonas sp.	Ld-bro-e
NC_001973.1_NP_047710.1	AF-A0A0B0D4S2-F1-model_v4	0.09054	94	0.6235	0.998	0.5786	Halobacillus sp. BBL2006	Ld-bro-e
NC_001973.1_NP_047710.1	AF-F0QZX8-F1-model_v4	0.05198	94	0.5667	0.998	0.5631	Phocaeicola salanitronis DSM 18170	Ld-bro-e
NC_001973.1_NP_047710.1	AF-A0A749KZL0-F1-model_v4	0.08004	94	0.6004	0.998	0.5823	Salmonella enterica	Ld-bro-e
NC_001973.1_NP_047710.1	AF-A0A0Q9C150-F1-model_v4	0.07525	94	0.5992	0.998	0.5787	Oerskovia sp. Root918	Ld-bro-e
NC_001973.1_NP_047710.1	AF-A0A3E4YLP4-F1-model_v4	0.08513	94	0.6053	0.998	0.5834	[Eubacterium] rectale	Ld-bro-e
NC_001973.1_NP_047710.1	AF-A0A085HIB5-F1-model_v4	0.1394	94	0.6568	0.998	0.596	Leminorella grimontii ATCC 33999 = DSM 5078	Ld-bro-e
NC_001973.1_NP_047710.1	AF-A0A1A2C9X7-F1-model_v4	0.07525	94	0.595	0.998	0.5734	Mycolicibacterium fortuitum	Ld-bro-e
NC_001973.1_NP_047710.1	AF-A0A1H7V975-F1-model_v4	0.05529	94	0.5835	0.998	0.5559	Pasteurella skyensis	Ld-bro-e
NC_001973.1_NP_047710.1	AF-A0A2P2BQU0-F1-model_v4	0.06254	93	0.5812	0.998	0.5564	Romboutsia hominis	Ld-bro-e
NC_001973.1_NP_047710.1	AF-A0A418JGQ5-F1-model_v4	0.06254	93	0.5858	0.998	0.5589	Staphylococcus hyicus	Ld-bro-e
NC_001973.1_NP_047710.1	AF-D4XNJ5-F1-model_v4	0.1577	93	0.6424	0.998	0.6195	Acinetobacter haemolyticus ATCC 19194	Ld-bro-e
NC_001973.1_NP_047710.1	AF-A0A6I1TBG8-F1-model_v4	0.0588	93	0.5953	0.998	0.5368	Prevotella copri	Ld-bro-e
NC_001973.1_NP_047710.1	AF-A0A6A8QJZ6-F1-model_v4	0.1394	93	0.6312	0.998	0.6049	Telmatospirillum sp.	Ld-bro-e
NC_001973.1_NP_047710.1	AF-A0A349H7W9-F1-model_v4	0.1311	93	0.6366	0.998	0.5967	Candidatus Competibacteraceae bacterium	Ld-bro-e
NC_001973.1_NP_047710.1	AF-U0ZRA2-F1-model_v4	0.1311	93	0.6358	0.998	0.5948	Pseudogulbenkiania ferrooxidans EGD-HP2	Ld-bro-e
NC_001973.1_NP_047710.1	AF-A0A4V3A5N9-F1-model_v4	0.03591	93	0.5564	0.998	0.5291	Mycobacteroides franklinii	Ld-bro-e
NC_001973.1_NP_047710.1	AF-A0A255TXQ4-F1-model_v4	0.1232	93	0.6214	0.998	0.6007	Prevotella sp. P2-180	Ld-bro-e
NC_001973.1_NP_047710.1	AF-A0A1I2BGG9-F1-model_v4	0.0432	93	0.5659	0.998	0.54	Actinopolyspora alba	Ld-bro-e
NC_001973.1_NP_047710.1	AF-A0A1D8UYS7-F1-model_v4	0.08004	93	0.5936	0.998	0.5714	Kozakia baliensis	Ld-bro-e
NC_001973.1_NP_047710.1	AF-A0A7W5GQZ8-F1-model_v4	0.1232	93	0.6264	0.998	0.595	Parvibacter caecicola	Ld-bro-e
NC_001973.1_NP_047710.1	AF-A0A8B3WRB6-F1-model_v4	0.1232	93	0.6325	0.998	0.5915	Propionibacterium freudenreichii	Ld-bro-e
NC_001973.1_NP_047710.1	AF-A0A7V8U7Q0-F1-model_v4	0.09054	93	0.6172	0.998	0.569	Sphingomonas ursincola	Ld-bro-e
NC_001973.1_NP_047710.1	AF-A0A2P8H7H3-F1-model_v4	0.1483	93	0.6485	0.998	0.5993	Planomicrobium soli	Ld-bro-e
NC_001973.1_NP_047710.1	AF-A0A5J5I740-F1-model_v4	0.1677	93	0.6527	0.998	0.607	Sphingobium limneticum	Ld-bro-e
NC_001973.1_NP_047710.1	AF-A0A010ZIH9-F1-model_v4	0.0963	93	0.6106	0.998	0.5789	Cloacibacillus evryensis DSM 19522	Ld-bro-e
NC_001973.1_NP_047710.1	AF-A0A7Y4IIK9-F1-model_v4	0.1159	93	0.6166	0.998	0.6018	Myxococcus xanthus	Ld-bro-e
NC_001973.1_NP_047710.1	AF-A0A1I2Q6E5-F1-model_v4	0.1577	93	0.6654	0.998	0.5957	Streptomyces mirabilis	Ld-bro-e
NC_001973.1_NP_047710.1	AF-A0A3C1BS17-F1-model_v4	0.1159	92	0.6483	0.997	0.5605	Deferribacteraceae bacterium	Ld-bro-e
NC_001973.1_NP_047710.1	AF-G1WGE2-F1-model_v4	0.1394	92	0.6293	0.997	0.5945	Collinsella tanakaei YIT 12063	Ld-bro-e
NC_001973.1_NP_047710.1	AF-A0A561DGV8-F1-model_v4	0.1089	92	0.5892	0.997	0.6069	Pseudomonas sp. AG1028	Ld-bro-e
NC_001973.1_NP_047710.1	AF-A0A560H6J1-F1-model_v4	0.06254	92	0.5701	0.997	0.5535	Nitrospirillum amazonense	Ld-bro-e
NC_001973.1_NP_047710.1	AF-A0A2X0QIH9-F1-model_v4	0.09054	92	0.5933	0.997	0.5723	Brochothrix thermosphacta	Ld-bro-e
NC_001973.1_NP_047710.1	AF-A0A160MA55-F1-model_v4	0.07075	92	0.5849	0.997	0.5622	Cytobacillus oceanisediminis 2691	Ld-bro-e
NC_001973.1_NP_047710.1	AF-A0A2X0WHZ8-F1-model_v4	0.1311	92	0.642	0.997	0.5744	Anaerobiospirillum thomasii	Ld-bro-e
NC_001973.1_NP_047710.1	AF-A0A515J062-F1-model_v4	0.1089	92	0.6118	0.997	0.5759	Bacteroides ovatus	Ld-bro-e
NC_001973.1_NP_047710.1	AF-A0A6S7B956-F1-model_v4	0.1311	92	0.6283	0.997	0.5932	Pararobbsia alpina	Ld-bro-e
NC_001973.1_NP_047710.1	AF-A0A6A2FC51-F1-model_v4	0.08004	92	0.5998	0.997	0.5601	Exiguobacterium chiriqhucha	Ld-bro-e
NC_001973.1_NP_047710.1	AF-A0A173HBQ5-F1-model_v4	0.1784	92	0.6443	0.997	0.6139	Pseudomonas sp. JY-Q	Ld-bro-e
NC_001973.1_NP_047710.1	AF-A0A6N7VRX4-F1-model_v4	0.1483	92	0.6308	0.997	0.5968	Scrofimicrobium canadense	Ld-bro-e
NC_001973.1_NP_047710.1	AF-A0A1E4VEK8-F1-model_v4	0.2583	92	0.7084	0.997	0.606	Aeromonas sp. DNP9	Ld-bro-e
NC_001973.1_NP_047710.1	AF-A0A433H5C5-F1-model_v4	0.2747	92	0.7127	0.997	0.6068	Kocuria sp. HSID16901	Ld-bro-e
NC_001973.1_NP_047710.1	AF-A0A3S0UXR9-F1-model_v4	0.06254	92	0.598	0.997	0.5342	Azospirillum doebereinerae	Ld-bro-e
NC_001973.1_NP_047710.1	AF-A0A4V2FR75-F1-model_v4	0.2428	92	0.7235	0.997	0.5914	Pseudonocardia sediminis	Ld-bro-e
NC_001973.1_NP_047710.1	AF-A0A3D2LUW8-F1-model_v4	0.2428	92	0.7199	0.997	0.5877	Bacteroides ovatus	Ld-bro-e
NC_001973.1_NP_047710.1	AF-A0A4P7ZCW0-F1-model_v4	0.0963	92	0.6194	0.997	0.5577	Azospirillum sp. TSA2s	Ld-bro-e
NC_001973.1_NP_047710.1	AF-A0A3D3ARJ8-F1-model_v4	0.1483	92	0.6428	0.997	0.588	Spirochaetia bacterium	Ld-bro-e
NC_001973.1_NP_047710.1	AF-A0A3R9ESY5-F1-model_v4	0.2428	91	0.7032	0.997	0.5964	Bacillus sp. (in: Bacteria)	Ld-bro-e
NC_001973.1_NP_047710.1	AF-A0A7C9B5Y2-F1-model_v4	0.1577	91	0.6457	0.997	0.5802	Acetobacter senegalensis	Ld-bro-e
NC_001973.1_NP_047710.1	AF-A0A069A448-F1-model_v4	0.1784	91	0.6589	0.997	0.5925	Clostridioides difficile	Ld-bro-e
NC_001973.1_NP_047710.1	AF-A0A1S9TCN9-F1-model_v4	0.1311	91	0.618	0.997	0.5818	Bacillus mycoides	Ld-bro-e
NC_001973.1_NP_047710.1	AF-A0A143C7G2-F1-model_v4	0.2283	91	0.708	0.997	0.5759	Streptomyces qaidamensis	Ld-bro-e
NC_001973.1_NP_047710.1	AF-A0A0X3Y1T1-F1-model_v4	0.03174	91	0.5204	0.997	0.5206	Fusobacterium nucleatum subsp. nucleatum	Ld-bro-e
NC_001973.1_NP_047710.1	AF-A0A011RMN7-F1-model_v4	0.1897	91	0.6515	0.997	0.6019	Candidatus Accumulibacter sp. BA-94	Ld-bro-e
NC_001973.1_NP_047710.1	AF-A0A349A4S8-F1-model_v4	0.1784	91	0.6445	0.997	0.5974	Syntrophus sp. (in: Bacteria)	Ld-bro-e
NC_001973.1_NP_047710.1	AF-A0A1V5UJD0-F1-model_v4	0.1311	91	0.6269	0.997	0.5802	Lentisphaerae bacterium ADurb.Bin242	Ld-bro-e
NC_001973.1_NP_047710.1	AF-A0A6L5X8X7-F1-model_v4	0.1483	91	0.63	0.997	0.5897	Sodaliphilus pleomorphus	Ld-bro-e
NC_001973.1_NP_047710.1	AF-A0A259BK20-F1-model_v4	0.08513	91	0.5836	0.997	0.5617	Rhizobiales bacterium 17-65-6	Ld-bro-e
NC_001973.1_NP_047710.1	AF-A0A378PXI5-F1-model_v4	0.2922	91	0.7154	0.997	0.6114	Moraxella bovis	Ld-bro-e
NC_001973.1_NP_047710.1	AF-A0A4Y3W3Y7-F1-model_v4	0.06652	91	0.5786	0.997	0.5446	Glutamicibacter nicotianae	Ld-bro-e
NC_001973.1_NP_047710.1	AF-A0A7X0AZJ0-F1-model_v4	0.06652	91	0.5724	0.997	0.5446	Nitrospirillum iridis	Ld-bro-e
NC_001973.1_NP_047710.1	AF-A0A2E8IHL9-F1-model_v4	0.1394	91	0.6233	0.997	0.5877	Pseudomonadaceae bacterium	Ld-bro-e
NC_001973.1_NP_047710.1	AF-A0A6B8Z348-F1-model_v4	0.02984	91	0.5423	0.997	0.5025	Lacticaseibacillus paracasei subsp. paracasei	Ld-bro-e
NC_001973.1_NP_047710.1	AF-A0A0D6NKT0-F1-model_v4	0.06652	91	0.5701	0.997	0.5494	Acetobacter orientalis	Ld-bro-e
NC_001973.1_NP_047710.1	AF-A0A1I4B5P4-F1-model_v4	0.1232	91	0.6148	0.997	0.5757	Nitrosomonas aestuarii	Ld-bro-e
NC_001973.1_NP_047710.1	AF-A0A7V6U1C4-F1-model_v4	0.1394	90	0.6232	0.996	0.5753	Brucella intermedia	Ld-bro-e
NC_001973.1_NP_047710.1	AF-A0A2Z6D3Y5-F1-model_v4	0.07075	90	0.5714	0.996	0.547	Nostoc sp. HK-01	Ld-bro-e
NC_001973.1_NP_047710.1	AF-A0A140E4R6-F1-model_v4	0.1394	90	0.6246	0.996	0.5792	Methylomonas denitrificans	Ld-bro-e
NC_001973.1_NP_047710.1	AF-A0A378QGT2-F1-model_v4	0.1677	90	0.633	0.996	0.5905	Moraxella lacunata	Ld-bro-e
NC_001973.1_NP_047710.1	AF-A0A148N495-F1-model_v4	0.08513	90	0.5765	0.996	0.559	Methylothermaceae bacteria B42	Ld-bro-e
NC_001973.1_NP_047710.1	AF-A0A3P1ZJH3-F1-model_v4	0.1232	90	0.6118	0.996	0.5704	Desulfovibrio sp. OH1186_COT-070	Ld-bro-e
NC_001973.1_NP_047710.1	AF-A0A377ICF2-F1-model_v4	0.1784	90	0.6471	0.996	0.5843	Avibacterium paragallinarum	Ld-bro-e
NC_001973.1_NP_047710.1	AF-A0A6H2Y8Q7-F1-model_v4	0.09054	90	0.5898	0.996	0.562	Bacillus sp. M 2-6	Ld-bro-e
NC_001973.1_NP_047710.1	AF-A0A2Z4R605-F1-model_v4	0.04595	90	0.5506	0.996	0.5266	Moraxella bovis	Ld-bro-e
NC_001973.1_NP_047710.1	AF-A0A4Q2HYJ5-F1-model_v4	0.09054	90	0.5739	0.996	0.5657	Fictibacillus sp. S7	Ld-bro-e
NC_001973.1_NP_047710.1	AF-A0A2V2GP72-F1-model_v4	0.2283	90	0.6563	0.996	0.6076	Oscillospiraceae bacterium	Ld-bro-e
NC_001973.1_NP_047710.1	AF-A0A1Y5DI87-F1-model_v4	0.09054	90	0.5782	0.996	0.5658	Bermanella sp. 47_1433_sub80_T6	Ld-bro-e
NC_001973.1_NP_047710.1	AF-A0A5R8QYB6-F1-model_v4	0.2922	90	0.7042	0.996	0.6055	Pseudomonas edaphica	Ld-bro-e
NC_001973.1_NP_047710.1	AF-A0A839E3P5-F1-model_v4	0.1677	90	0.6305	0.996	0.5906	Halosaccharopolyspora lacisalsi	Ld-bro-e
NC_001973.1_NP_047710.1	AF-A0A2V2TBW7-F1-model_v4	0.1577	90	0.6148	0.996	0.5986	Pseudomonas sp. RW407	Ld-bro-e
NC_001973.1_NP_047710.1	AF-Q8XLD2-F1-model_v4	0.07525	90	0.5705	0.996	0.5587	Clostridium perfringens str. 13	Ld-bro-e
NC_001973.1_NP_047710.1	AF-A0A1Y2H7G7-F1-model_v4	0.1784	90	0.6717	0.996	0.5702	Catenaria anguillulae PL171	Ld-bro-e
NC_001973.1_NP_047710.1	AF-J8FI89-F1-model_v4	0.06652	89	0.5461	0.996	0.5498	Bacillus cereus MC67	Ld-bro-e
NC_001973.1_NP_047710.1	AF-A0A7S7AHH1-F1-model_v4	0.1394	89	0.6229	0.996	0.5641	Acinetobacter piscicola	Ld-bro-e
NC_001973.1_NP_047710.1	AF-A0A6I2ITH4-F1-model_v4	0.1784	89	0.6328	0.996	0.5808	Xylella fastidiosa subsp. multiplex	Ld-bro-e
NC_001973.1_NP_047710.1	AF-A0A3A8W367-F1-model_v4	0.0963	89	0.5784	0.996	0.5661	bacterium D16-59	Ld-bro-e
NC_001973.1_NP_047710.1	AF-K1YM13-F1-model_v4	0.1677	89	0.6284	0.996	0.5776	uncultured bacterium	Ld-bro-e
NC_001973.1_NP_047710.1	AF-A0A3R6IK22-F1-model_v4	0.1024	89	0.6096	0.996	0.5452	Prevotella copri	Ld-bro-e
NC_001973.1_NP_047710.1	AF-A0A6N7D7P4-F1-model_v4	0.1232	89	0.6004	0.996	0.565	Xylophilus sp.	Ld-bro-e
NC_001973.1_NP_047710.1	AF-A0A2N0X510-F1-model_v4	0.04887	89	0.5409	0.996	0.525	Corynebacterium mastitidis	Ld-bro-e
NC_001973.1_NP_047710.1	AF-A0A6J4F6Y2-F1-model_v4	0.1483	89	0.6099	0.996	0.5856	Magnetospirillum sp. UT-4	Ld-bro-e
NC_001973.1_NP_047710.1	AF-R7KZM5-F1-model_v4	0.1159	89	0.5895	0.996	0.5671	Ruminococcus sp. CAG:353	Ld-bro-e
NC_001973.1_NP_047710.1	AF-G0A3S4-F1-model_v4	0.1024	89	0.6027	0.996	0.5461	Methylomonas methanica MC09	Ld-bro-e
NC_001973.1_NP_047710.1	AF-A0A433R816-F1-model_v4	0.2428	89	0.6917	0.996	0.5785	Cohnella sp. AR92	Ld-bro-e
NC_001973.1_NP_047710.1	AF-A0A5C0SHK2-F1-model_v4	0.3107	89	0.7245	0.996	0.5821	Crassaminicella thermophila	Ld-bro-e
NC_001973.1_NP_047710.1	AF-A0A0Q6TGH4-F1-model_v4	0.2583	89	0.6522	0.996	0.6165	Massilia sp. Root335	Ld-bro-e
NC_001973.1_NP_047710.1	AF-C6M4H5-F1-model_v4	0.0432	89	0.5336	0.996	0.5247	Neisseria sicca ATCC 29256	Ld-bro-e
NC_001973.1_NP_047710.1	AF-A0A6G1VK46-F1-model_v4	0.0588	89	0.5601	0.996	0.5247	Prevotella copri	Ld-bro-e
NC_001973.1_NP_047710.1	AF-A0A6A4KM59-F1-model_v4	0.05198	89	0.5433	0.996	0.5337	Apolygus lucorum	Ld-bro-e
NC_001973.1_NP_047710.1	AF-A0A2K8TA82-F1-model_v4	0.1089	88	0.5919	0.995	0.5517	Nostoc flagelliforme CCNUN1	Ld-bro-e
NC_001973.1_NP_047710.1	AF-A0A7I7TEB3-F1-model_v4	0.3305	88	0.6967	0.995	0.5924	Mycolicibacterium helvum	Ld-bro-e
NC_001973.1_NP_047710.1	AF-F8GCL6-F1-model_v4	0.1311	88	0.6215	0.995	0.5454	Nitrosomonas sp. Is79A3	Ld-bro-e
NC_001973.1_NP_047710.1	AF-A0A6H0KFX9-F1-model_v4	0.1897	88	0.6226	0.995	0.5952	Yokenella regensburgei	Ld-bro-e
NC_001973.1_NP_047710.1	AF-A0A836TRK4-F1-model_v4	0.1394	88	0.6204	0.995	0.5572	Sneathiellales bacterium	Ld-bro-e
NC_001973.1_NP_047710.1	AF-A0A1H0V2H2-F1-model_v4	0.0963	88	0.5712	0.995	0.5603	Eubacterium limosum	Ld-bro-e
NC_001973.1_NP_047710.1	AF-A0A2Z4R6E6-F1-model_v4	0.1089	88	0.5913	0.995	0.5529	Moraxella bovis	Ld-bro-e
NC_001973.1_NP_047710.1	AF-A0A7Z0MZZ7-F1-model_v4	0.1784	88	0.6266	0.995	0.5789	Alcaligenaceae bacterium	Ld-bro-e
NC_001973.1_NP_047710.1	AF-A0A2D8M988-F1-model_v4	0.1232	88	0.5722	0.995	0.5823	Erythrobacter sp.	Ld-bro-e
NC_001973.1_NP_047710.1	AF-A0A1Y1IVL9-F1-model_v4	0.2283	88	0.6774	0.995	0.5592	Klebsormidium nitens	Ld-bro-e
NC_001973.1_NP_047710.1	AF-A0A6B2PYY2-F1-model_v4	0.01046	87	0.4482	0.994	0.4579	Acinetobacter baumannii	Ld-bro-e
NC_001973.1_NP_047710.1	AF-A0A3A6MUC1-F1-model_v4	0.2428	87	0.6554	0.994	0.5844	Candidatus Desulforudis sp.	Ld-bro-e
NC_001973.1_NP_047710.1	AF-A0A2S0UC50-F1-model_v4	0.3107	87	0.6937	0.994	0.5835	Paenibacillus sp. CAA11	Ld-bro-e
NC_001973.1_NP_047710.1	AF-A0A6N0LXT7-F1-model_v4	0.0963	87	0.5678	0.994	0.5464	Nostoc sp. TCL240-02	Ld-bro-e
NC_001973.1_NP_047710.1	AF-A0A7X6JUV8-F1-model_v4	0.2747	87	0.6843	0.994	0.5764	Rhodobacteraceae bacterium R_SAG2	Ld-bro-e
NC_001973.1_NP_047710.1	AF-E5YAN8-F1-model_v4	0.2146	87	0.6227	0.994	0.5997	Bilophila wadsworthia 3_1_6	Ld-bro-e
NC_001973.1_NP_047710.1	AF-A0A069EXU9-F1-model_v4	0.1311	87	0.594	0.994	0.5579	Exiguobacterium sp. AB2	Ld-bro-e
NC_001973.1_NP_047710.1	AF-K7T173-F1-model_v4	0.1577	87	0.6086	0.994	0.5679	Gluconobacter oxydans H24	Ld-bro-e
NC_001973.1_NP_047710.1	AF-A0A3R6RVW4-F1-model_v4	0.06652	87	0.5651	0.994	0.5135	Clostridiaceae bacterium AF18-31LB	Ld-bro-e
NC_001973.1_NP_047710.1	AF-A0A1G6K3K3-F1-model_v4	0.1089	87	0.56	0.994	0.5637	Actinokineospora iranica	Ld-bro-e
NC_001973.1_NP_047710.1	AF-A0A6I1C056-F1-model_v4	0.1394	87	0.5922	0.994	0.5636	Bifidobacterium longum	Ld-bro-e
NC_001973.1_NP_047710.1	AF-V9V245-F1-model_v4	0.1784	87	0.6057	0.994	0.591	Pseudomonas monteilii SB3101	Ld-bro-e
NC_001973.1_NP_047710.1	AF-A0A417LQY3-F1-model_v4	0.06254	87	0.5346	0.994	0.5272	Ruminococcus sp. TM09-4	Ld-bro-e
NC_001973.1_NP_047710.1	AF-A0A5B8HK47-F1-model_v4	0.1677	87	0.615	0.994	0.5697	Dickeya poaceiphila	Ld-bro-e
NC_001973.1_NP_047710.1	AF-A0A5P0WXE9-F1-model_v4	0.09054	86	0.5685	0.993	0.5266	Prevotella copri	Ld-bro-e
NC_001973.1_NP_047710.1	AF-A0A4S2E7K5-F1-model_v4	0.3977	86	0.7073	0.993	0.5906	Pasteurella caecimuris	Ld-bro-e
NC_001973.1_NP_047710.1	AF-A0A1Y6CUF8-F1-model_v4	0.2146	86	0.6401	0.993	0.5695	Methylomagnum ishizawai	Ld-bro-e
NC_001973.1_NP_047710.1	AF-E1VAE1-F1-model_v4	0.2146	86	0.6565	0.993	0.5534	Halomonas elongata DSM 2581	Ld-bro-e
NC_001973.1_NP_047710.1	AF-A0A3M4YLB6-F1-model_v4	0.2018	86	0.6275	0.993	0.5693	Pseudomonas coronafaciens pv. striafaciens	Ld-bro-e
NC_001973.1_NP_047710.1	AF-A0A7J5B6L6-F1-model_v4	0.2428	86	0.6329	0.993	0.5839	Pseudoclavibacter terrae	Ld-bro-e
NC_001973.1_NP_047710.1	AF-A0A1G8PX93-F1-model_v4	0.1677	85	0.5745	0.992	0.5827	Pseudomonas flavescens	Ld-bro-e
NC_001973.1_NP_047710.1	AF-G9RS55-F1-model_v4	0.2283	85	0.6199	0.992	0.5811	Subdoligranulum sp. 4_3_54A2FAA	Ld-bro-e
NC_001973.1_NP_047710.1	AF-C1D8H6-F1-model_v4	0.07525	85	0.557	0.992	0.5115	Laribacter hongkongensis HLHK9	Ld-bro-e
NC_001973.1_NP_047710.1	AF-Q2NTL3-F1-model_v4	0.2747	85	0.628	0.992	0.5911	Sodalis glossinidius str. 'morsitans'	Ld-bro-e
NC_001973.1_NP_047710.1	AF-B7KIY7-F1-model_v4	0.1311	85	0.5792	0.992	0.5478	Gloeothece citriformis PCC 7424	Ld-bro-e
NC_001973.1_NP_047710.1	AF-A0A149UMP0-F1-model_v4	0.07525	85	0.5418	0.992	0.5155	Acetobacter malorum	Ld-bro-e
NC_001973.1_NP_047710.1	AF-A0A510J812-F1-model_v4	0.1159	85	0.5569	0.992	0.5564	Pseudoleptotrichia goodfellowii	Ld-bro-e
NC_001973.1_NP_047710.1	AF-A0A2N8NAM2-F1-model_v4	0.1024	85	0.5436	0.992	0.5579	Tannerella sp. oral taxon 808	Ld-bro-e
NC_001973.1_NP_047710.1	AF-C6XH53-F1-model_v4	0.2018	85	0.6176	0.992	0.5648	Candidatus Liberibacter asiaticus str. psy62	Ld-bro-e
NC_001973.1_NP_047710.1	AF-A0A7D4JYC6-F1-model_v4	0.2747	85	0.6119	0.992	0.6072	Finegoldia magna	Ld-bro-e
NC_001973.1_NP_047710.1	AF-A0A212SHY1-F1-model_v4	0.2428	85	0.6368	0.992	0.568	Rhodoblastus acidophilus	Ld-bro-e
NC_001973.1_NP_047710.1	AF-A0A1H9VJB8-F1-model_v4	0.4785	85	0.7052	0.992	0.5986	Lentzea albida	Ld-bro-e
NC_001973.1_NP_047710.1	AF-A0A1G9V7S9-F1-model_v4	0.2583	85	0.6259	0.992	0.5876	Methylobacterium phyllostachyos	Ld-bro-e
NC_001973.1_NP_047710.1	AF-A0A0N0GNR5-F1-model_v4	0.2583	85	0.6225	0.992	0.5961	Amantichitinum ursilacus	Ld-bro-e
NC_001973.1_NP_047710.1	AF-A0A6I2ITP0-F1-model_v4	0.3305	85	0.644	0.992	0.6101	Xylella fastidiosa subsp. multiplex	Ld-bro-e
NC_001973.1_NP_047710.1	AF-G9PUE5-F1-model_v4	0.2018	84	0.5962	0.991	0.5643	Synergistes sp. 3_1_syn1	Ld-bro-e
NC_001973.1_NP_047710.1	AF-A0A2S9I838-F1-model_v4	0.2922	84	0.6178	0.991	0.6033	Pantoea coffeiphila	Ld-bro-e
NC_001973.1_NP_047710.1	AF-V4PZL5-F1-model_v4	0.2018	84	0.6123	0.991	0.5554	Pasteurella multocida subsp. multocida P1062	Ld-bro-e
NC_001973.1_NP_047710.1	AF-A0A6I4IM69-F1-model_v4	0.03174	84	0.4756	0.991	0.4885	Acinetobacter baumannii	Ld-bro-e
NC_001973.1_NP_047710.1	AF-A0A563W2G2-F1-model_v4	0.1677	84	0.5839	0.991	0.5533	Hyella patelloides LEGE 07179	Ld-bro-e
NC_001973.1_NP_047710.1	AF-A0A6M8HXZ1-F1-model_v4	0.4229	84	0.695	0.991	0.575	Lichenicola cladoniae	Ld-bro-e
NC_001973.1_NP_047710.1	AF-A0A432D549-F1-model_v4	0.1784	84	0.5832	0.991	0.5652	Vibrio penaeicida	Ld-bro-e
NC_001973.1_NP_047710.1	AF-A0A8B2AQE2-F1-model_v4	0.1677	83	0.6133	0.99	0.5178	Prevotella melaninogenica	Ld-bro-e
NC_001973.1_NP_047710.1	AF-A0A1I6XZC6-F1-model_v4	0.1897	83	0.5865	0.99	0.5634	Pseudovibrio denitrificans	Ld-bro-e
NC_001973.1_NP_047710.1	AF-D5H583-F1-model_v4	0.03819	83	0.4574	0.99	0.5141	Salinibacter ruber M8	Ld-bro-e
NC_001973.1_NP_047710.1	AF-J1F6L3-F1-model_v4	0.3305	83	0.6625	0.99	0.5554	Thiovulum sp. ES	Ld-bro-e
NC_001973.1_NP_047710.1	AF-A0A439EPD5-F1-model_v4	0.2283	83	0.6044	0.99	0.568	Xylella fastidiosa subsp. sandyi	Ld-bro-e
NC_001973.1_NP_047710.1	AF-A0A448J6V4-F1-model_v4	0.1677	83	0.582	0.99	0.5426	Campylobacter jejuni subsp. doylei	Ld-bro-e
NC_001973.1_NP_047710.1	AF-A0A4P5NTQ4-F1-model_v4	0.2018	83	0.6019	0.99	0.5528	Komagataeibacter diospyri	Ld-bro-e
NC_001973.1_NP_047710.1	AF-D0WCQ7-F1-model_v4	0.1577	83	0.5981	0.99	0.5285	Neisseria lactamica ATCC 23970	Ld-bro-e
NC_001973.1_NP_047710.1	AF-D5BYU3-F1-model_v4	0.2283	83	0.6221	0.99	0.5474	Nitrosococcus halophilus Nc 4	Ld-bro-e
NC_001973.1_NP_047710.1	AF-A0A8B0U871-F1-model_v4	0.2428	83	0.62	0.99	0.5538	Xylella fastidiosa subsp. multiplex	Ld-bro-e
NC_001973.1_NP_047710.1	AF-A0A193QJV1-F1-model_v4	0.2018	82	0.5959	0.988	0.5387	Sodalis glossinidius str. 'morsitans'	Ld-bro-e
NC_001973.1_NP_047710.1	AF-A0A4S5BB02-F1-model_v4	0.1311	82	0.5617	0.988	0.5259	Bifidobacterium longum subsp. infantis	Ld-bro-e
NC_001973.1_NP_047710.1	AF-A0A4Q3L7S0-F1-model_v4	0.2146	82	0.5928	0.988	0.547	Oxalobacteraceae bacterium	Ld-bro-e
NC_001973.1_NP_047710.1	AF-A0A6N7RMW0-F1-model_v4	0.2428	82	0.6031	0.988	0.5633	Eggerthella guodeyinii	Ld-bro-e
NC_001973.1_NP_047710.1	AF-A0A7X5ZGB9-F1-model_v4	0.2146	82	0.5874	0.988	0.5632	Mycolicibacterium fluoranthenivorans	Ld-bro-e
NC_001973.1_NP_047710.1	AF-A0A0A7I6R7-F1-model_v4	0.09054	82	0.5446	0.988	0.5	Bifidobacterium kashiwanohense PV20-2	Ld-bro-e
NC_001973.1_NP_047710.1	AF-A0A3Q9W3I1-F1-model_v4	0.1784	82	0.5559	0.988	0.5681	Pseudoalteromonas sp. R3	Ld-bro-e
NC_001973.1_NP_047710.1	AF-A0A809D800-F1-model_v4	0.03819	82	0.472	0.988	0.4886	Acinetobacter baumannii	Ld-bro-e
NC_001973.1_NP_047710.1	AF-A0A823U6W1-F1-model_v4	0.1311	81	0.5521	0.986	0.518	Campylobacter jejuni	Ld-bro-e
NC_001973.1_NP_047710.1	AF-A0A443Z6R1-F1-model_v4	0.4498	81	0.6424	0.986	0.5972	Xanthomonas axonopodis pv. manihotis str. CIO151	Ld-bro-e
NC_001973.1_NP_047710.1	AF-A0A4Q9QWI1-F1-model_v4	0.3305	81	0.6214	0.986	0.5749	Pseudomonas dryadis	Ld-bro-e
[truncated: 229,429+ more rows]

## Sheet: Table S2
Supplementary Table 2. Baculoviral homologs founded in Araneus ventricosus by querying predicted protein structures of selected scaffolds in predicted baculoviral protein structures via Foldseek
query	target	evalue	bits	alntmscore	prob	lddt	product	symbol
BGPR01003736.1_ORF.73	NC_003084.1_NP_203376.1	1.54	18	0.221	0.02	0.6951	CUN072 hypothetical protein
BGPR01003736.1_ORF.73	NC_001973.1_NP_047713.1	4.39	12	0.242	0.008	0.6091	LdOrf-76 peptide
BGPR01003736.1_ORF.73	NC_002816.1_NP_148833.1	4.094	12	0.2034	0.008	0.6649	ORF49 similar to XcGV ORF46
BGPR01003736.1_ORF.73	NC_001973.1_NP_047681.1	5.048	11	0.2063	0.007	0.693	late expression factor 11
BGPR01003736.1_ORF.73	NC_002816.1_NP_148855.1	5.048	10	0.1843	0	0.6401	ORF71 P24capsid
BGPR01003736.1_ORF.73	NC_002816.1_NP_148822.1	8.82	9	0.2834	0	0.717	ORF38 similar to XcGV ORF33
BGPR01003736.1_ORF.73	NC_005906.1_YP_025262.1	9.456	8	0.2791	0	0.6323	occlusion-derived virus envelope protein
BGPR01003736.1_ORF.73	NC_005906.1_YP_025243.1	9.456	8	0.2356	0	0.6595	hypothetical protein
BGPR01003736.1_ORF.73	NC_001973.1_NP_047724.1	8.82	8	0.2447	0	0.6515	LdOrf-87 peptide
BGPR01003736.1_ORF.73	NC_001973.1_NP_047700.1	9.456	8	0.2145	0	0.6831	Ld-FP'
BGPR01003736.1_ORF.73	NC_002816.1_NP_148857.1	8.226	8	0.24	0	0.6344	ORF73 38.7KD
BGPR01003736.1_ORF.73	NC_001623.1_NP_054129.1	5.804	8	0.1731	0	0.5911	late expression factor 5
BGPR01003736.1_ORF.73	NC_005906.1_YP_025206.1	4.39	8	0.1017	0	0.6599	hypothetical protein
BGPR01003736.1_ORF.73	NC_001623.1_NP_054121.1	9.456	7	0.1601	0	0.7386	AcOrf-91 peptide
BGPR01003736.1_ORF.73	NC_001973.1_NP_047755.1	9.456	7	0.1678	0	0.6918	LdOrf-118 peptide
BGPR01003736.1_ORF.73	NC_002816.1_NP_148813.1	7.672	6	0.09876	0	0.7305	ORF29 similar to XcGV ORF25
BGPR01001437.1_ORF.326	NC_002816.1_NP_148856.1	2.12	20	0.5042	0.029	0.3618	ORF72
BGPR01001437.1_ORF.326	NC_001973.1_NP_047692.1	1.302	18	0.3449	0.02	0.3097	late expression factor 10
BGPR01001437.1_ORF.326	NC_001623.1_NP_054117.1	0.96	18	0.2409	0.02	0.3675	p15
BGPR01001437.1_ORF.326	NC_005906.1_YP_025226.1	2.253	18	0.4327	0.02	0.3251	hypothetical protein
BGPR01001437.1_ORF.326	NC_003084.1_NP_203339.1	4.144	18	0.5734	0.02	0.4125	CUN035 putative p91 capsid virion protein, similar to AcMNPV ORF83
BGPR01001437.1_ORF.326	NC_005906.1_YP_025290.1	1.661	17	0.2368	0.016	0.4409	hypothetical protein
BGPR01001437.1_ORF.326	NC_002816.1_NP_148792.1	4.144	17	0.6775	0.016	0.3185	ORF8 similar to AcMNPV ORF146
BGPR01001437.1_ORF.326	NC_003084.1_NP_203377.1	2.253	17	0.4103	0.016	0.3261	CUN073 putative p47 transcription regulator factor, similar to AcMNPV ORF40
BGPR01001437.1_ORF.326	NC_002816.1_NP_148885.1	3.899	17	0.5521	0.016	0.3794	ORF101 VP91 capsid
BGPR01001437.1_ORF.326	NC_001623.1_NP_054128.1	2.705	16	0.4076	0.014	0.3248	hypothetical protein
BGPR01001437.1_ORF.326	NC_001623.1_NP_054107.1	3.669	16	0.3982	0.014	0.4201	very late expression factor 1
BGPR01001437.1_ORF.326	NC_001623.1_NP_054156.1	1.766	16	0.2909	0.014	0.3296	chitinase
BGPR01001437.1_ORF.326	NC_002816.1_NP_148890.1	6.746	15	0.6015	0.011	0.4485	ORF106 VLF-1
BGPR01001437.1_ORF.326	NC_003084.1_NP_203313.1	6.348	14	0.5675	0.01	0.3707	CUN009 hypothetical protein
BGPR01001437.1_ORF.326	NC_003084.1_NP_203387.1	3.056	14	0.2926	0.01	0.3806	CUN084 hypothetical protein
BGPR01001437.1_ORF.326	NC_001973.1_NP_047788.1	1.995	14	0.2445	0.01	0.3529	LdOrf-151 peptide
BGPR01001437.1_ORF.326	NC_003084.1_NP_203322.1	6.746	14	0.5091	0.01	0.4682	CUN018 putative vlf-1 very late expression factor 1, similar to AcMNPV ORF77
BGPR01001437.1_ORF.326	NC_001623.1_NP_054086.1	5.973	13	0.4845	0.009	0.3572	AcOrf-56 peptide
BGPR01001437.1_ORF.326	NC_001623.1_NP_054038.1	2.395	13	0.176	0.009	0.4358	viral capsid associated protein
BGPR01001437.1_ORF.326	NC_001973.1_NP_047728.1	4.144	13	0.4971	0.009	0.2697	capsid associated protein
BGPR01001437.1_ORF.326	NC_001623.1_NP_054083.1	3.248	12	0.3295	0.008	0.2693	late expression factor 10
BGPR01001437.1_ORF.326	NC_005906.1_YP_025271.1	5.288	12	0.4896	0.008	0.2794	hypothetical protein
BGPR01001437.1_ORF.326	NC_003084.1_NP_203397.1	5.62	12	0.3785	0.008	0.3604	CUN093 hypothetical protein
BGPR01001437.1_ORF.326	NC_001973.1_NP_047736.1	3.669	12	0.2934	0.008	0.3195	LdOrf-99 peptide
BGPR01001437.1_ORF.326	NC_002816.1_NP_148897.1	4.975	12	0.4715	0.008	0.2852	ORF113 LEF-3
BGPR01001437.1_ORF.326	NC_001623.1_NP_054131.1	2.875	12	0.2148	0.008	0.4044	hypothetical protein
BGPR01001437.1_ORF.326	NC_005906.1_YP_025259.1	3.056	12	0.3457	0.008	0.2385	late expression factor-4
BGPR01001437.1_ORF.326	NC_002816.1_NP_148920.1	3.056	11	0.2936	0.007	0.2638	ORF136 similar to XcGV ORF173
BGPR01001437.1_ORF.326	NC_001623.1_NP_054064.1	8.605	11	0.5865	0.007	0.3402	viral ubiquitin
BGPR01001437.1_ORF.326	NC_002816.1_NP_148793.1	2.12	11	0.2331	0.007	0.2538	ORF9 similar to AcMNPV ORF145
BGPR01001437.1_ORF.326	NC_002816.1_NP_148898.1	4.144	11	0.3611	0.007	0.2368	ORF114 similar to AcMNPV ORF68
BGPR01001437.1_ORF.326	NC_001623.1_NP_054030.1	8.097	11	0.6141	0.007	0.3032	protein tyrosine phosphatase
BGPR01001437.1_ORF.326	NC_001623.1_NP_054041.1	7.169	11	0.3834	0.007	0.3933	AcOrf-12 peptide
BGPR01001437.1_ORF.326	NC_002816.1_NP_148871.1	2.545	11	0.1859	0.007	0.3399	ORF87 LEF-5
BGPR01001437.1_ORF.326	NC_001623.1_NP_054069.1	3.248	11	0.2638	0.007	0.2909	transcription regulator
BGPR01001437.1_ORF.326	NC_002816.1_NP_148852.1	4.404	11	0.2793	0.007	0.3303	ORF68 P47
BGPR01001437.1_ORF.326	NC_003084.1_NP_203378.1	8.605	11	0.5376	0.007	0.3961	CUN074 putative p74 envelope protein, similar to AcMNPV ORF138
BGPR01001437.1_ORF.326	NC_001973.1_NP_047672.1	6.348	10	0.424	0	0.2612	LdOrf-36 peptide
BGPR01001437.1_ORF.326	NC_001973.1_NP_047717.1	7.619	10	0.6423	0	0.2394	LdOrf-80 peptide
BGPR01001437.1_ORF.326	NC_001623.1_NP_054055.1	6.348	10	0.4372	0	0.2552	AcOrf-26 peptide
BGPR01001437.1_ORF.326	NC_002816.1_NP_148873.1	9.144	10	0.4096	0	0.4046	ORF89 similar to AcMNPV ORF96
BGPR01001437.1_ORF.326	NC_001623.1_NP_054129.1	3.248	10	0.203	0	0.3138	late expression factor 5
BGPR01001437.1_ORF.326	NC_001623.1_NP_054097.1	4.144	10	0.2217	0	0.3392	late expression factor 3
BGPR01001437.1_ORF.326	NC_001973.1_NP_047707.1	5.288	10	0.2968	0	0.3141	chitinase
BGPR01001437.1_ORF.326	NC_003084.1_NP_203363.1	1.877	10	0.1402	0	0.3129	CUN059 putative lef-9 transcription factor, RNApol motif, similar to AcMNPV ORF62
BGPR01001437.1_ORF.326	NC_003084.1_NP_203362.1	8.097	9	0.3822	0	0.3052	CUN058 similar to AcMNPV ORF68
BGPR01001437.1_ORF.326	NC_005906.1_YP_025238.1	8.097	9	0.3892	0	0.3084	hypothetical protein
BGPR01001437.1_ORF.326	NC_001623.1_NP_054118.1	8.097	9	0.5699	0	0.2291	hypothetical protein
BGPR01001437.1_ORF.326	NC_003084.1_NP_203308.1	7.619	9	0.3864	0	0.3042	CUN004 bro-like protein
BGPR01001437.1_ORF.326	NC_003084.1_NP_203357.1	7.619	9	0.4263	0	0.2842	CUN054 putative alk-exo DNA processing exonuclease, similar to AcMNPV ORF133
BGPR01001437.1_ORF.326	NC_005906.1_YP_025246.1	6.348	9	0.316	0	0.3042	hypothetical protein
BGPR01001437.1_ORF.326	NC_001973.1_NP_047684.1	4.681	9	0.2501	0	0.2957	Ld-p47
BGPR01001437.1_ORF.326	NC_001623.1_NP_054079.1	5.973	9	0.3777	0	0.2402	late expression factor 8
BGPR01001437.1_ORF.326	NC_003084.1_NP_203330.1	8.097	9	0.3809	0	0.3037	CUN026 putative lef-8 late transcription factor, Rna_Pol_Beta motif, similar to AcMNPV ORF50
BGPR01001437.1_ORF.326	NC_003084.1_NP_203396.1	1.661	9	0.1	0	0.2994	CUN091 putative dnapolymerase, similar to AcMNPV ORF65
BGPR01001437.1_ORF.326	NC_002816.1_NP_148902.1	7.169	8	0.2527	0	0.3198	ORF118 FP
BGPR01001437.1_ORF.326	NC_003084.1_NP_203346.1	5.973	8	0.323	0	0.241	CUN041 hypothetical protein
BGPR01001437.1_ORF.326	NC_002816.1_NP_148857.1	2.705	8	0.1263	0	0.3022	ORF73 38.7KD
BGPR01001437.1_ORF.326	NC_001623.1_NP_054166.1	6.746	8	0.3342	0	0.2487	hypothetical protein
BGPR01001437.1_ORF.326	NC_002816.1_NP_148877.1	7.619	8	0.2055	0	0.43	ORF93 similar to AcMNPV ORF92
BGPR01001437.1_ORF.326	NC_003084.1_NP_203376.1	7.619	8	0.362	0	0.2823	CUN072 hypothetical protein
BGPR01001437.1_ORF.326	NC_005906.1_YP_025239.1	2.705	8	0.1414	0	0.2695	hypothetical protein
BGPR01001437.1_ORF.326	NC_002816.1_NP_148867.1	4.975	8	0.1985	0	0.2707	ORF83 similar to AcMNPV ORF103
BGPR01001437.1_ORF.326	NC_001973.1_NP_047686.1	8.097	8	0.3962	0	0.2736	Ld-helicase-2
BGPR01001437.1_ORF.326	NC_003084.1_NP_203400.1	7.619	8	0.3083	0	0.3195	CUN096 putative lef-4 transcription factor, similar to AcMNPV ORF90
BGPR01001437.1_ORF.326	NC_002816.1_NP_148901.1	7.169	8	0.2486	0	0.3354	ORF117 LEF-9
BGPR01001437.1_ORF.326	NC_003084.1_NP_203309.1	4.975	8	0.2034	0	0.2881	CUN005 putative bro protein, similar to AcMNPV ORF2
BGPR01001437.1_ORF.326	NC_001623.1_NP_054113.1	4.144	8	0.2117	0	0.2309	viral capsid associated protein
BGPR01001437.1_ORF.326	NC_001973.1_NP_047720.1	7.619	8	0.3072	0	0.3278	DNA polymerase
BGPR01001437.1_ORF.326	NC_002816.1_NP_148882.1	7.619	7	0.2892	0	0.2213	ORF98 PTP-2
BGPR01001437.1_ORF.326	NC_002816.1_NP_148801.1	5.62	7	0.1536	0	0.37	ORF17 IAP-3
BGPR01001437.1_ORF.326	NC_005906.1_YP_025260.1	5.973	7	0.1569	0	0.3357	hypothetical protein
BGPR01001437.1_ORF.326	NC_002816.1_NP_148879.1	9.717	7	0.3423	0	0.2757	ORF95 LEF-4
BGPR01001437.1_ORF.326	NC_003084.1_NP_203413.1	5.973	7	0.1678	0	0.3275	CUN109 putative bro protein, ATP_GTP_A motif, similar to AcMNPV ORF2
BGPR01001437.1_ORF.326	NC_001623.1_NP_054164.1	3.669	7	0.1261	0	0.2791	hypothetical protein
BGPR01001437.1_ORF.326	NC_001623.1_NP_054095.1	8.097	7	0.3095	0	0.2226	DNA-dependant DNA-polymerase
BGPR01001437.1_ORF.326	NC_003084.1_NP_203388.1	9.144	6	0.2392	0	0.2855	CUN083 hypothetical protein
BGPR01001437.1_ORF.326	NC_001623.1_NP_054036.1	9.717	6	0.3741	0	0.2225	hypothetical protein
BGPR01001437.1_ORF.326	NC_001973.1_NP_047727.1	7.169	6	0.2096	0	0.2445	LdOrf-82 peptide
BGPR01001437.1_ORF.326	NC_001973.1_NP_047765.1	7.169	6	0.2335	0	0.2166	LdOrf-128 peptide
BGPR01001437.1_ORF.326	NC_001973.1_NP_047687.1	8.605	6	0.2153	0	0.2676	late expression factor 8
BGPR01001437.1_ORF.326	NC_005906.1_YP_025255.1	9.717	5	0.1714	0	0.2951	late expression factor-5
BGPR01001437.1_ORF.326	NC_001623.1_NP_054119.1	8.097	5	0.1296	0	0.2786	major viral capsid protein
BGPR01001437.1_ORF.326	NC_001623.1_NP_054046.1	9.144	4	0.1803	0	0.1956	AcOrf-17 peptide
BGPR01003736.1_ORF.98	NC_001973.1_NP_047657.1	0.004264	69	0.4848	0.923	0.5207	immediate early transactivator 0	IE-0
BGPR01003736.1_ORF.98	NC_001623.1_NP_054082.1	0.06111	56	0.6133	0.663	0.5512	AcOrf-53 peptide
BGPR01003736.1_ORF.98	NC_001623.1_NP_054172.1	0.1552	53	0.6956	0.569	0.582	hypothetical protein
BGPR01003736.1_ORF.98	NC_001973.1_NP_047769.1	0.01971	52	0.4045	0.537	0.5138	LdOrf-132
BGPR01003736.1_ORF.98	NC_001623.1_NP_054101.1	0.05005	51	0.5227	0.505	0.4948	apoptosis inhibitor
BGPR01003736.1_ORF.98	NC_002816.1_NP_148878.1	0.01614	49	0.351	0.442	0.5075	ORF94 IAP
BGPR01003736.1_ORF.98	NC_001623.1_NP_054056.1	0.01614	46	0.3406	0.353	0.4475	apoptosis inhibitor
BGPR01003736.1_ORF.98	NC_001623.1_NP_054073.1	0.03357	45	0.3492	0.326	0.5122	AcOrf-44 peptide
BGPR01003736.1_ORF.98	NC_001973.1_NP_047690.1	0.2313	38	0.5026	0.179	0.4885	LdOrf-54 peptide
BGPR01003736.1_ORF.98	NC_001973.1_NP_047776.1	0.05349	38	0.3368	0.179	0.4324	apoptosis inhibitor
BGPR01003736.1_ORF.98	NC_001973.1_NP_047716.1	0.05717	37	0.3341	0.164	0.4356	apoptosis inhibitor
BGPR01003736.1_ORF.98	NC_002816.1_NP_148801.1	0.05005	37	0.303	0.164	0.4466	ORF17 IAP-3
BGPR01003736.1_ORF.98	NC_001623.1_NP_054182.1	0.07462	36	0.3167	0.15	0.4636	early gene transactivator
BGPR01003736.1_ORF.98	NC_002816.1_NP_148900.1	0.1112	34	0.3156	0.126	0.4816	ORF116 IAP-5
BGPR01003736.1_ORF.98	NC_001623.1_NP_054184.1	0.4811	28	0.3748	0.076	0.4831	hypothetical protein
BGPR01003736.1_ORF.98	NC_002816.1_NP_148811.1	1.594	28	0.6262	0.076	0.5282	ORF27
BGPR01003736.1_ORF.98	NC_002816.1_NP_148918.1	0.8194	25	0.4322	0.057	0.4279	ORF134 similar to AcMNPV ORF53
BGPR01003736.1_ORF.98	NC_001623.1_NP_054118.1	2.715	22	0.5454	0.04	0.5593	hypothetical protein
BGPR01003736.1_ORF.98	NC_001623.1_NP_054072.1	0.8194	21	0.3561	0.034	0.3586	AcOrf-43 peptide
BGPR01003736.1_ORF.98	NC_001973.1_NP_047694.1	5.646	14	0.4168	0.01	0.5499	LdOrf-58 peptide
BGPR01003736.1_ORF.98	NC_003084.1_NP_203389.1	0.5142	14	0.09746	0.01	0.491	CUN085 putative occlusion body protein
BGPR01003736.1_ORF.98	NC_001973.1_NP_047685.1	7.367	13	0.4757	0.009	0.5446	LdOrf-49 peptide
BGPR01003736.1_ORF.98	NC_001973.1_NP_047648.1	7.873	13	0.4807	0.009	0.6388	LdOrf-12 peptide
BGPR01003736.1_ORF.98	NC_003084.1_NP_203399.1	6.449	13	0.395	0.009	0.558	CUN095 putative bro protein, similar to AcMNPV ORF2
BGPR01003736.1_ORF.98	NC_002816.1_NP_148844.1	7.367	13	0.4796	0.009	0.5502	ORF60 P74
BGPR01003736.1_ORF.98	NC_005906.1_YP_025251.1	1.306	12	0.14	0.008	0.3821	hypothetical protein
BGPR01003736.1_ORF.98	NC_003084.1_NP_203319.1	1.306	11	0.1337	0.007	0.3848	CUN015 hypothetical protein
BGPR01003736.1_ORF.98	NC_003084.1_NP_203376.1	5.646	11	0.3216	0.007	0.4942	CUN072 hypothetical protein
BGPR01003736.1_ORF.98	NC_001973.1_NP_047749.1	8.414	10	0.3584	0	0.5375	Ld-bro-h
BGPR01003736.1_ORF.98	NC_002816.1_NP_148786.1	3.316	10	0.1755	0	0.4213	ORF2 similar to XcGV ORF2
BGPR01003736.1_ORF.98	NC_001973.1_NP_047794.1	6.449	10	0.4557	0	0.3316	alkaline exonuclease
BGPR01003736.1_ORF.98	NC_002816.1_NP_148879.1	1.594	10	0.1691	0	0.2961	ORF95 LEF-4
BGPR01003736.1_ORF.98	NC_001623.1_NP_054096.1	4.943	10	0.174	0	0.6461	AcOrf-66 peptide
BGPR01003736.1_ORF.98	NC_001623.1_NP_054088.1	8.991	9	0.3512	0	0.4965	AcOrf-58 peptide
BGPR01003736.1_ORF.98	NC_001973.1_NP_047771.1	4.327	9	0.2013	0	0.3642	LdOrf-134 peptide
BGPR01003736.1_ORF.98	NC_002816.1_NP_148846.1	3.544	9	0.1061	0	0.5945	ORF62 similar to PxGV ORF50
BGPR01003736.1_ORF.98	NC_003084.1_NP_203310.1	4.625	9	0.1419	0	0.5823	CUN007 hypothetical protein
BGPR01003736.1_ORF.98	NC_003084.1_NP_203391.1	7.367	9	0.2687	0	0.4902	CUN088 putative lef-5 late expression factor, similar to AcMNPV ORF99
BGPR01003736.1_ORF.98	NC_002816.1_NP_148919.1	8.414	9	0.3047	0	0.4996	ORF135 similar to XcGV ORF172
BGPR01003736.1_ORF.98	NC_001973.1_NP_047688.1	7.367	8	0.2372	0	0.4481	LdOrf-52 peptide
BGPR01003736.1_ORF.98	NC_001623.1_NP_054050.1	7.367	8	0.2516	0	0.4187	actin rearrangement inducing factor
BGPR01003736.1_ORF.98	NC_001973.1_NP_047739.1	7.367	8	0.2609	0	0.4517	LdOrf-102 peptide
BGPR01003736.1_ORF.98	NC_002816.1_NP_148808.1	7.873	8	0.2543	0	0.4501	ORF24 PE-38
BGPR01003736.1_ORF.98	NC_001973.1_NP_047742.1	2.377	8	0.08153	0	0.4573	Ld-vp80
BGPR01003736.1_ORF.98	NC_001973.1_NP_047640.1	3.544	8	0.09609	0	0.5585	mucin-like protein
BGPR01003736.1_ORF.98	NC_002816.1_NP_148854.1	6.449	7	0.1742	0	0.3849	ORF70
BGPR01003736.1_ORF.98	NC_002816.1_NP_148875.1	6.034	7	0.171	0	0.4283	ORF91 ODV-E25
BGPR01003736.1_ORF.98	NC_002816.1_NP_148871.1	3.102	7	0.1173	0	0.3477	ORF87 LEF-5
BGPR01003736.1_ORF.98	NC_001623.1_NP_054129.1	5.283	7	0.1407	0	0.371	late expression factor 5
BGPR01003736.1_ORF.98	NC_003084.1_NP_203407.1	3.316	7	0.07981	0	0.51	CUN103 hypothetical protein
BGPR01003736.1_ORF.98	NC_001623.1_NP_054131.1	9.608	7	0.2162	0	0.4692	hypothetical protein
BGPR01003736.1_ORF.98	NC_003084.1_NP_203361.1	9.608	7	0.267	0	0.4666	CUN057 hypothetical protein
BGPR01003736.1_ORF.98	NC_001623.1_NP_054178.1	7.367	7	0.2125	0	0.3971	early gene transactivator
BGPR01003736.1_ORF.98	NC_001973.1_NP_047697.1	4.943	6	0.1275	0	0.3684	LdOrf-61 peptide
BGPR01003736.1_ORF.98	NC_001623.1_NP_054177.1	8.991	6	0.2985	0	0.284	AcOrf-146 peptide
BGPR01003736.1_ORF.98	NC_001623.1_NP_054121.1	7.873	6	0.1098	0	0.6105	AcOrf-91 peptide
BGPR01003736.1_ORF.98	NC_001973.1_NP_047800.1	7.367	6	0.1808	0	0.3908	LdOrf-163 peptide
BGPR01003736.1_ORF.98	NC_002816.1_NP_148909.1	7.873	6	0.2381	0	0.2544	ORF125 ALK-EXO
BGPR01003736.1_ORF.98	NC_001973.1_NP_047756.1	6.449	6	0.1412	0	0.3667	LdOrf-119 peptide
BGPR01003736.1_ORF.98	NC_002816.1_NP_148915.1	8.414	6	0.1776	0	0.4547	ORF131 LEF-8
BGPR01003736.1_ORF.98	NC_003084.1_NP_203367.1	7.873	5	0.1388	0	0.3186	CUN063 hypothetical protein
BGPR01003736.1_ORF.98	NC_002816.1_NP_148904.1	9.608	5	0.2103	0	0.2888	ORF120 DNALIGASE
BGPR01003736.1_ORF.98	NC_005906.1_YP_025206.1	6.449	5	0.1039	0	0.4233	hypothetical protein
BGPR01003736.1_ORF.98	NC_001973.1_NP_047692.1	9.608	4	0.1744	0	0.2762	late expression factor 10
BGPR01006520.1_ORF.10	NC_001973.1_NP_047664.1	4.076	11	0.2397	0.007	0.6606	LdOrf-28 peptide
BGPR01006520.1_ORF.10	NC_002816.1_NP_148810.1	7.836	10	0.3536	0	0.7476	ORF26
BGPR01006520.1_ORF.10	NC_005906.1_YP_025276.1	5.652	10	0.2773	0	0.6321	hypothetical protein
BGPR01006520.1_ORF.10	NC_002816.1_NP_148798.1	6.656	8	0.2194	0	0.6253	ORF14 ODV-E18
BGPR01006520.1_ORF.10	NC_003084.1_NP_203367.1	9.225	8	0.3598	0	0.6638	CUN063 hypothetical protein
BGPR01006520.1_ORF.10	NC_001623.1_NP_054119.1	8.503	7	0.2254	0	0.648	major viral capsid protein
BGPR01006520.1_ORF.19	NC_003084.1_NP_203374.1	3.873	22	0.6223	0.04	0.7445	CUN070 hypothetical protein
BGPR01006520.1_ORF.19	NC_001623.1_NP_054037.1	3.354	19	0.5254	0.024	0.5912	major occlusion body protein
BGPR01006520.1_ORF.19	NC_002816.1_NP_148882.1	7.402	18	0.8344	0.02	0.7275	ORF98 PTP-2
BGPR01006520.1_ORF.19	NC_001623.1_NP_054068.1	5.165	18	0.6264	0.02	0.6749	hypothetical protein
BGPR01006520.1_ORF.19	NC_001623.1_NP_054097.1	5.965	16	0.5819	0.014	0.6326	late expression factor 3
BGPR01006520.1_ORF.19	NC_003084.1_NP_203386.1	5.551	15	0.4339	0.011	0.701	CUN082 hypothetical protein
BGPR01006520.1_ORF.19	NC_003084.1_NP_203347.1	5.965	13	0.3572	0.009	0.6628	CUN043 hypothetical protein
BGPR01006520.1_ORF.19	NC_003084.1_NP_203334.1	8.546	10	0.3588	0	0.6243	CUN030 similar to AcMNPV ORF142
BGPR01006520.1_ORF.19	NC_005906.1_YP_025273.1	5.551	9	0.2488	0	0.4735	hypothetical protein
BGPR01006520.1_ORF.19	NC_001973.1_NP_047799.1	5.551	8	0.2069	0	0.476	LdOrf-162 peptide
BGPR01006520.1_ORF.19	NC_001973.1_NP_047693.1	9.866	8	0.3765	0	0.4886	LdOrf-57 peptide
BGPR01006520.1_ORF.19	NC_002816.1_NP_148856.1	9.866	7	0.2789	0	0.5212	ORF72
BGPR01006520.1_ORF.19	NC_002816.1_NP_148841.1	9.182	6	0.2058	0	0.4078	ORF57 39K
BGPR01017730.1_ORF.44	NC_003084.1_NP_203346.1	0.3886	38	0.5376	0.179	0.4727	CUN041 hypothetical protein
BGPR01017730.1_ORF.44	NC_005906.1_YP_025239.1	1.312	33	0.5908	0.116	0.591	hypothetical protein
BGPR01017730.1_ORF.44	NC_001623.1_NP_054097.1	0.9676	33	0.5224	0.116	0.5614	late expression factor 3
BGPR01017730.1_ORF.44	NC_001623.1_NP_054162.1	1.312	27	0.6207	0.069	0.3755	AcOrf-132 peptide
BGPR01017730.1_ORF.44	NC_001623.1_NP_054095.1	0.8063	24	0.363	0.051	0.3975	DNA-dependant DNA-polymerase
BGPR01017730.1_ORF.44	NC_005906.1_YP_025226.1	0.7587	23	0.3212	0.045	0.3872	hypothetical protein
BGPR01017730.1_ORF.44	NC_003084.1_NP_203404.1	0.8063	23	0.3827	0.045	0.3428	CUN100 hypothetical protein
BGPR01017730.1_ORF.44	NC_001623.1_NP_054117.1	1.312	21	0.4073	0.034	0.3572	p15
BGPR01017730.1_ORF.44	NC_001623.1_NP_054165.1	2.133	21	0.4321	0.034	0.4549	annihilator
BGPR01017730.1_ORF.44	NC_005906.1_YP_025231.1	2.409	21	0.4853	0.034	0.4498	unkown
BGPR01017730.1_ORF.44	NC_002816.1_NP_148799.1	1.673	21	0.3611	0.034	0.447	ORF15 P49
BGPR01017730.1_ORF.44	NC_005906.1_YP_025204.1	2.892	20	0.4873	0.029	0.4578	hypothetical protein
BGPR01017730.1_ORF.44	NC_003084.1_NP_203313.1	1.889	19	0.3655	0.024	0.3918	CUN009 hypothetical protein
BGPR01017730.1_ORF.44	NC_001623.1_NP_054112.1	2.892	18	0.4147	0.02	0.4158	telokin-like protein-20
BGPR01017730.1_ORF.44	NC_001973.1_NP_047718.1	3.919	18	0.4522	0.02	0.5079	late expression factor 3
BGPR01017730.1_ORF.44	NC_003084.1_NP_203339.1	1.778	18	0.293	0.02	0.4208	CUN035 putative p91 capsid virion protein, similar to AcMNPV ORF83
BGPR01017730.1_ORF.44	NC_001973.1_NP_047692.1	1.889	17	0.3446	0.016	0.358	late expression factor 10
BGPR01017730.1_ORF.44	NC_003084.1_NP_203376.1	3.266	16	0.3522	0.014	0.4433	CUN072 hypothetical protein
BGPR01017730.1_ORF.44	NC_003084.1_NP_203399.1	1.673	16	0.2731	0.014	0.3548	CUN095 putative bro protein, similar to AcMNPV ORF2
BGPR01017730.1_ORF.44	NC_003084.1_NP_203308.1	7.648	15	0.6911	0.011	0.4453	CUN004 bro-like protein
BGPR01017730.1_ORF.44	NC_001973.1_NP_047656.1	2.133	15	0.2553	0.011	0.3804	LdOrf-20 peptide
BGPR01017730.1_ORF.44	NC_003084.1_NP_203413.1	2.56	15	0.3241	0.011	0.3491	CUN109 putative bro protein, ATP_GTP_A motif, similar to AcMNPV ORF2
BGPR01017730.1_ORF.44	NC_002816.1_NP_148895.1	2.892	15	0.3451	0.011	0.3738	ORF111 DNAPOL
BGPR01017730.1_ORF.44	NC_005906.1_YP_025284.1	7.648	14	0.4798	0.01	0.5843	viral capsid associated protein
BGPR01017730.1_ORF.44	NC_003084.1_NP_203312.1	3.266	14	0.3114	0.01	0.3781	CUN008 putative vp1054 virion associated assembly protein, similar to AcMNPV ORF54
BGPR01017730.1_ORF.44	NC_002816.1_NP_148820.1	1.778	13	0.2018	0.009	0.3295	ORF36
BGPR01017730.1_ORF.44	NC_002816.1_NP_148827.1	4.703	13	0.3058	0.009	0.4357	ORF43
BGPR01017730.1_ORF.44	NC_003084.1_NP_203320.1	5.311	13	0.3438	0.009	0.469	CUN016 hypothetical protein
BGPR01017730.1_ORF.44	NC_001973.1_NP_047643.1	6.773	13	0.4261	0.009	0.4784	LdOrf-7 peptide
BGPR01017730.1_ORF.44	NC_002816.1_NP_148886.1	5.311	13	0.4655	0.009	0.3502	ORF102 TLP20
BGPR01017730.1_ORF.44	NC_001623.1_NP_054078.1	4.703	13	0.3709	0.009	0.374	proliferating cell nuclear antigen
BGPR01017730.1_ORF.44	NC_001623.1_NP_054129.1	3.266	13	0.3222	0.009	0.3034	late expression factor 5
BGPR01017730.1_ORF.44	NC_001973.1_NP_047775.1	7.648	13	0.5927	0.009	0.3704	LdOrf-138 peptide
BGPR01017730.1_ORF.44	NC_003084.1_NP_203389.1	5.644	13	0.3685	0.009	0.4221	CUN085 putative occlusion body protein
BGPR01017730.1_ORF.44	NC_003084.1_NP_203397.1	8.126	12	0.4428	0.008	0.4491	CUN093 hypothetical protein
BGPR01017730.1_ORF.44	NC_001973.1_NP_047727.1	2.721	12	0.2983	0.008	0.258	LdOrf-82 peptide
BGPR01017730.1_ORF.44	NC_002816.1_NP_148924.1	4.165	12	0.2824	0.008	0.37	ORF140 similar to XcGV ORF178
BGPR01017730.1_ORF.44	NC_003084.1_NP_203342.1	4.703	12	0.2885	0.008	0.4438	CUN038 similar to AcMNPV ORF22
BGPR01017730.1_ORF.44	NC_001623.1_NP_054182.1	3.688	12	0.2632	0.008	0.3431	early gene transactivator
BGPR01017730.1_ORF.44	NC_001973.1_NP_047720.1	7.648	12	0.4391	0.008	0.4501	DNA polymerase
BGPR01017730.1_ORF.44	NC_001623.1_NP_054185.1	4.426	11	0.3453	0.007	0.295	AcOrf-154 peptide
BGPR01017730.1_ORF.44	NC_002816.1_NP_148856.1	7.197	11	0.3958	0.007	0.3733	ORF72
BGPR01017730.1_ORF.44	NC_002816.1_NP_148814.1	3.688	11	0.2204	0.007	0.3465	ORF30 similar to XcGV ORF26
BGPR01017730.1_ORF.44	NC_003084.1_NP_203306.1	4.703	11	0.2794	0.007	0.3516	CUN002 hypothetical protein, ATP_GTP_A motif
BGPR01017730.1_ORF.44	NC_005906.1_YP_025289.1	4.998	11	0.3769	0.007	0.3026	major viral capsid protein
BGPR01017730.1_ORF.44	NC_005906.1_YP_025260.1	5.311	11	0.2417	0.007	0.4593	hypothetical protein
BGPR01017730.1_ORF.44	NC_001623.1_NP_054079.1	4.998	11	0.2642	0.007	0.4125	late expression factor 8
BGPR01017730.1_ORF.44	NC_003084.1_NP_203314.1	7.648	10	0.3396	0	0.389	CUN010 hypothetical protein
BGPR01017730.1_ORF.44	NC_001623.1_NP_054083.1	4.165	10	0.2487	0	0.3109	late expression factor 10
BGPR01017730.1_ORF.44	NC_002816.1_NP_148921.1	4.703	10	0.3069	0	0.2693	ORF137 LEF-10
BGPR01017730.1_ORF.44	NC_003084.1_NP_203393.1	4.426	10	0.223	0	0.3908	CUN090 putative similar to AcMNPV ORF96
BGPR01017730.1_ORF.44	NC_001973.1_NP_047704.1	5.644	10	0.2646	0	0.3498	host range factor 1
BGPR01017730.1_ORF.44	NC_003084.1_NP_203305.1	5.311	10	0.2806	0	0.321	CUN001 putative bro protein, ATP_GTP_A motif, similar to AcMNPV ORF 2
BGPR01017730.1_ORF.44	NC_001973.1_NP_047714.1	8.635	9	0.3378	0	0.3953	LdOrf-77 peptide
BGPR01017730.1_ORF.44	NC_001973.1_NP_047793.1	6.773	9	0.2784	0	0.3788	fibroblast growth factor
BGPR01017730.1_ORF.44	NC_002816.1_NP_148832.1	8.126	9	0.2898	0	0.4149	ORF48 similar to AcMNPV ORF22
BGPR01017730.1_ORF.44	NC_001973.1_NP_047795.1	4.998	9	0.2205	0	0.3032	LdOrf-158 peptide
BGPR01017730.1_ORF.44	NC_005906.1_YP_025250.1	7.648	9	0.3532	0	0.3387	hypothetical protein
BGPR01017730.1_ORF.44	NC_003084.1_NP_203309.1	6.773	9	0.311	0	0.3488	CUN005 putative bro protein, similar to AcMNPV ORF2
BGPR01017730.1_ORF.44	NC_003084.1_NP_203412.1	9.748	9	0.5473	0	0.316	CUN108 putative bro protein, ATP_GTP_A motif, similar to AcMNPV ORF2
BGPR01017730.1_ORF.44	NC_001973.1_NP_047748.1	7.197	8	0.2139	0	0.394	LdOrf-111 peptide
BGPR01017730.1_ORF.44	NC_002816.1_NP_148861.1	4.426	8	0.1685	0	0.3223	ORF77 similar to XcGV ORF86
BGPR01017730.1_ORF.44	NC_003084.1_NP_203368.1	4.426	8	0.1789	0	0.3255	CUN064 hypothetical protein
BGPR01017730.1_ORF.44	NC_005906.1_YP_025257.1	6.773	8	0.2162	0	0.343	hypothetical protein
BGPR01017730.1_ORF.44	NC_001623.1_NP_054061.1	5.644	8	0.2095	0	0.3099	fibroblast growth factor
BGPR01017730.1_ORF.44	NC_001973.1_NP_047726.1	8.126	8	0.3177	0	0.3048	LdOrf-81 peptide
BGPR01017730.1_ORF.44	NC_002816.1_NP_148871.1	9.175	8	0.3262	0	0.3181	ORF87 LEF-5
BGPR01017730.1_ORF.44	NC_001623.1_NP_054051.1	9.748	8	0.3363	0	0.41	AcOrf-22 peptide
BGPR01017730.1_ORF.44	NC_001973.1_NP_047756.1	9.748	8	0.3081	0	0.44	LdOrf-119 peptide
BGPR01017730.1_ORF.44	NC_002816.1_NP_148830.1	9.175	8	0.2957	0	0.3655	ORF46 metalloproteinase
BGPR01017730.1_ORF.44	NC_003084.1_NP_203363.1	8.126	8	0.3058	0	0.3128	CUN059 putative lef-9 transcription factor, RNApol motif, similar to AcMNPV ORF62
BGPR01017730.1_ORF.44	NC_001623.1_NP_054113.1	5.998	8	0.2492	0	0.291	viral capsid associated protein
BGPR01017730.1_ORF.44	NC_002816.1_NP_148915.1	6.374	8	0.2144	0	0.3385	ORF131 LEF-8
BGPR01017730.1_ORF.44	NC_003084.1_NP_203330.1	9.748	8	0.325	0	0.3687	CUN026 putative lef-8 late transcription factor, Rna_Pol_Beta motif, similar to AcMNPV ORF50
BGPR01017730.1_ORF.44	NC_002816.1_NP_148908.1	8.126	7	0.2755	0	0.2646	ORF124
BGPR01017730.1_ORF.44	NC_001973.1_NP_047672.1	8.126	7	0.2221	0	0.3068	LdOrf-36 peptide
BGPR01017730.1_ORF.44	NC_001973.1_NP_047759.1	6.773	7	0.2056	0	0.3331	LdOrf-122 peptide
BGPR01017730.1_ORF.44	NC_001973.1_NP_047794.1	9.748	7	0.3781	0	0.2787	alkaline exonuclease
BGPR01017730.1_ORF.44	NC_001623.1_NP_054116.1	8.126	7	0.247	0	0.2981	polynucleotide kinase/ligase
BGPR01017730.1_ORF.44	NC_002816.1_NP_148873.1	6.773	6	0.1733	0	0.3038	ORF89 similar to AcMNPV ORF96
BGPR01017730.1_ORF.44	NC_001623.1_NP_054126.1	7.197	6	0.1815	0	0.3084	AcOrf-96 peptide
BGPR01017730.1_ORF.44	NC_001973.1_NP_047705.1	9.748	6	0.2702	0	0.31	Ld-gp37
BGPR01017730.1_ORF.44	NC_002816.1_NP_148907.1	9.748	6	0.2217	0	0.37	ORF123 FGF
BGPR01017730.1_ORF.44	NC_005906.1_YP_025279.1	8.126	6	0.2035	0	0.2949	late expression factor-8
BGPR01005754.1_ORF.127	NC_001623.1_NP_054183.1	0.8896	22	0.2906	0.04	0.7288	AcOrf-152 peptide
BGPR01005754.1_ORF.127	NC_001623.1_NP_054121.1	3.912	16	0.4028	0.014	0.739	AcOrf-91 peptide
BGPR01005754.1_ORF.127	NC_003084.1_NP_203356.1	7.295	14	0.5606	0.01	0.7818	CUN051 hypothetical protein
BGPR01005754.1_ORF.127	NC_001973.1_NP_047739.1	3.912	13	0.2793	0.009	0.7228	LdOrf-102 peptide
BGPR01005754.1_ORF.127	NC_002816.1_NP_148822.1	5.775	11	0.295	0.007	0.7222	ORF38 similar to XcGV ORF33
BGPR01005754.1_ORF.127	NC_002816.1_NP_148855.1	6.749	11	0.3452	0.007	0.7511	ORF71 P24capsid
BGPR01005754.1_ORF.127	NC_003084.1_NP_203362.1	9.957	9	0.4567	0	0.6626	CUN058 similar to AcMNPV ORF68
BGPR01005754.1_ORF.127	NC_003084.1_NP_203321.1	9.213	9	0.3324	0	0.7373	CUN017 hypothetical protein
BGPR01005754.1_ORF.127	NC_001623.1_NP_054129.1	7.885	9	0.288	0	0.6641	late expression factor 5
BGPR01005754.1_ORF.127	NC_001623.1_NP_054134.1	9.213	9	0.3198	0	0.7697	viral capsid associated protein
BGPR01005754.1_ORF.127	NC_005906.1_YP_025220.1	9.957	9	0.3336	0	0.7499	hypothetical protein
BGPR01005754.1_ORF.127	NC_002816.1_NP_148869.1	7.885	8	0.2204	0	0.6589	ORF85 similar to AcMNPV ORF101
BGPR01005754.1_ORF.227	NC_001973.1_NP_047655.1	7.096	9	0.2814	0	0.5659	LdOrf-odv-e18 peptide
BGPR01005754.1_ORF.245	NC_005906.1_YP_025204.1	4.441	10	0.3041	0	0.3745	hypothetical protein
BGPR01005754.1_ORF.245	NC_003084.1_NP_203401.1	6.749	8	0.3137	0	0.3565	CUN097 hypothetical protein
BGPR01005754.1_ORF.245	NC_001623.1_NP_054052.1	8.918	8	0.4243	0	0.3496	copia-like envelope protein
BGPR01005754.1_ORF.245	NC_001623.1_NP_054093.1	9.561	7	0.2678	0	0.4727	AcOrf-63 peptide
BGPR01005754.1_ORF.245	NC_002816.1_NP_148896.1	5.475	7	0.1836	0	0.4005	ORF112 DESMOPLAKIN
BGPR01005754.1_ORF.35	NC_002816.1_NP_148839.1	0.0009342	68	0.4124	0.912	0.348	ORF55 similar to AcMNPV ORF109	49K
BGPR01005754.1_ORF.35	NC_001623.1_NP_054139.1	0.0007363	63	0.3642	0.837	0.3306	AcOrf-109 peptide
BGPR01005754.1_ORF.35	NC_001973.1_NP_047744.1	0.0005467	55	0.2928	0.632	0.2984	LdOrf-107 peptide
BGPR01005754.1_ORF.35	NC_002816.1_NP_148910.1	0.05678	32	0.293	0.106	0.2979	ORF126 HELICASE-2
BGPR01005754.1_ORF.35	NC_002816.1_NP_148874.1	0.2669	29	0.377	0.082	0.3197	ORF90 HELICASE
BGPR01005754.1_ORF.35	NC_001973.1_NP_047686.1	0.1231	28	0.2697	0.076	0.3057	Ld-helicase-2
BGPR01005754.1_ORF.35	NC_001973.1_NP_047734.1	0.5137	21	0.3139	0.034	0.2616	helicase
BGPR01005754.1_ORF.35	NC_001623.1_NP_054071.1	0.4297	20	0.2422	0.029	0.2926	global transactivator-like protein
BGPR01005754.1_ORF.35	NC_001623.1_NP_054125.1	2.275	16	0.3754	0.014	0.3167	helicase
BGPR01005754.1_ORF.35	NC_001623.1_NP_054099.1	3.451	15	0.3814	0.011	0.3346	putative methyl transferase
BGPR01005754.1_ORF.35	NC_001973.1_NP_047778.1	2.02	15	0.3304	0.011	0.2849	LdOrf-141 peptide
BGPR01005754.1_ORF.35	NC_003084.1_NP_203394.1	1.413	15	0.2977	0.011	0.2604	CUN089 putative helicase-1, DNA replication, similar to AcMNPV ORF95
BGPR01005754.1_ORF.35	NC_005906.1_YP_025267.1	2.144	13	0.2771	0.009	0.2749	hypothetical protein
BGPR01005754.1_ORF.35	NC_001623.1_NP_054087.1	8.939	11	0.6131	0.007	0.3006	AcOrf-57 peptide
BGPR01005754.1_ORF.35	NC_003084.1_NP_203331.1	9.485	10	0.5378	0	0.3215	CUN027 hypothetical protein
BGPR01005754.1_ORF.35	NC_001623.1_NP_054144.1	5.556	10	0.3521	0	0.267	AcOrf-114 peptide
BGPR01005754.1_ORF.35	NC_002816.1_NP_148876.1	3.451	9	0.3002	0	0.1838	ORF92 similar to AcMNPV ORF93
BGPR01005754.1_ORF.35	NC_003084.1_NP_203382.1	9.485	8	0.4135	0	0.2495	CUN078 hypothetical protein
BGPR01005754.1_ORF.35	NC_001973.1_NP_047775.1	3.451	8	0.1598	0	0.2433	LdOrf-138 peptide
BGPR01005754.1_ORF.35	NC_001623.1_NP_054044.1	7.479	8	0.3479	0	0.2413	ecdysteroid UDP-glucosyl transferase
BGPR01005754.1_ORF.35	NC_003084.1_NP_203400.1	3.252	7	0.1354	0	0.2111	CUN096 putative lef-4 transcription factor, similar to AcMNPV ORF90
BGPR01005754.1_ORF.35	NC_003084.1_NP_203389.1	4.647	7	0.2039	0	0.223	CUN085 putative occlusion body protein
BGPR01005754.1_ORF.35	NC_005906.1_YP_025225.1	5.235	6	0.1772	0	0.2191	hypothetical protein
BGPR01005754.1_ORF.35	NC_002816.1_NP_148795.1	5.896	6	0.2044	0	0.1767	ORF11 cathepsin
BGPR01005754.1_ORF.35	NC_005906.1_YP_025288.1	7.479	6	0.2304	0	0.2207	hypothetical protein
BGPR01005754.1_ORF.35	NC_001973.1_NP_047730.1	8.423	6	0.3154	0	0.1682	late expression factor 4
BGPR01005754.1_ORF.35	NC_001623.1_NP_054142.1	7.937	5	0.2001	0	0.1973	AcOrf-112 peptide
BGPR01005754.1_ORF.35	NC_002816.1_NP_148800.1	6.641	5	0.1451	0	0.2039	ORF16 similar to OpMNPV ORF31
BGPR01005754.1_ORF.35	NC_001973.1_NP_047777.1	9.485	5	0.2023	0	0.2425	LdOrf-140 peptide
BGPR01005754.1_ORF.35	NC_003084.1_NP_203390.1	7.479	5	0.1663	0	0.2448	CUN086 hypothetical protein ATP_GTP_A motif
BGPR01005754.1_ORF.35	NC_005906.1_YP_025275.1	9.485	5	0.1799	0	0.2439	hypothetical protein
BGPR01005754.1_ORF.35	NC_005906.1_YP_025256.1	6.641	5	0.1494	0	0.1917	hypothetical protein
BGPR01005754.1_ORF.35	NC_001973.1_NP_047746.1	3.888	5	0.1327	0	0.1526	LdOrf-109 peptide
BGPR01005754.1_ORF.35	NC_001623.1_NP_054052.1	6.258	5	0.1468	0	0.202	copia-like envelope protein
BGPR01005754.1_ORF.35	NC_002816.1_NP_148799.1	7.048	4	0.1181	0	0.1691	ORF15 P49
BGPR01005754.1_ORF.35	NC_001623.1_NP_054128.1	7.937	3	0.1074	0	0.1591	hypothetical protein
BGPR01006520.1_ORF.95	NC_001623.1_NP_054165.1	0.2939	32	0.3566	0.106	0.42	annihilator
BGPR01006520.1_ORF.95	NC_001623.1_NP_054095.1	2.192	23	0.5263	0.045	0.4158	DNA-dependant DNA-polymerase
BGPR01006520.1_ORF.95	NC_001623.1_NP_054117.1	1.538	21	0.3971	0.034	0.3558	p15
BGPR01006520.1_ORF.95	NC_003084.1_NP_203314.1	1.731	20	0.3801	0.029	0.3887	CUN010 hypothetical protein
BGPR01006520.1_ORF.95	NC_003084.1_NP_203313.1	2.192	20	0.4232	0.029	0.4088	CUN009 hypothetical protein
BGPR01006520.1_ORF.95	NC_005906.1_YP_025251.1	4.727	19	0.609	0.024	0.4662	hypothetical protein
BGPR01006520.1_ORF.95	NC_005906.1_YP_025204.1	4.456	18	0.5883	0.02	0.3972	hypothetical protein
BGPR01006520.1_ORF.95	NC_001623.1_NP_054151.1	1.45	17	0.2633	0.016	0.3745	AcOrf-121 peptide
BGPR01006520.1_ORF.95	NC_005906.1_YP_025226.1	1.079	17	0.211	0.016	0.3676	hypothetical protein
BGPR01006520.1_ORF.95	NC_003084.1_NP_203339.1	5.015	16	0.4838	0.014	0.4368	CUN035 putative p91 capsid virion protein, similar to AcMNPV ORF83
BGPR01006520.1_ORF.95	NC_001623.1_NP_054079.1	3.518	15	0.3136	0.011	0.4225	late expression factor 8
BGPR01006520.1_ORF.95	NC_002816.1_NP_148827.1	5.015	14	0.4118	0.01	0.3742	ORF43
BGPR01006520.1_ORF.95	NC_003084.1_NP_203387.1	2.618	14	0.2722	0.01	0.3678	CUN084 hypothetical protein
BGPR01006520.1_ORF.95	NC_001973.1_NP_047717.1	6.351	13	0.4661	0.009	0.3824	LdOrf-80 peptide
BGPR01006520.1_ORF.95	NC_003084.1_NP_203332.1	4.727	13	0.3352	0.009	0.3855	CUN028 hypothetical protein
BGPR01006520.1_ORF.95	NC_003084.1_NP_203308.1	6.738	13	0.4392	0.009	0.4077	CUN004 bro-like protein
BGPR01006520.1_ORF.95	NC_001623.1_NP_054097.1	6.351	13	0.4126	0.009	0.4291	late expression factor 3
BGPR01006520.1_ORF.95	NC_003084.1_NP_203377.1	5.644	13	0.3908	0.009	0.3819	CUN073 putative p47 transcription regulator factor, similar to AcMNPV ORF40
BGPR01006520.1_ORF.95	NC_001973.1_NP_047692.1	4.2	12	0.3794	0.008	0.2859	late expression factor 10
BGPR01006520.1_ORF.95	NC_003084.1_NP_203310.1	4.2	12	0.2701	0.008	0.3538	CUN007 hypothetical protein
BGPR01006520.1_ORF.95	NC_001973.1_NP_047775.1	9.599	12	0.6252	0.008	0.4307	LdOrf-138 peptide
BGPR01006520.1_ORF.95	NC_003084.1_NP_203406.1	6.351	12	0.353	0.008	0.4286	CUN102 putative odv-e56 envelope protein, similar to AcMNPV ORF148
BGPR01006520.1_ORF.95	NC_002816.1_NP_148885.1	2.468	12	0.1975	0.008	0.3314	ORF101 VP91 capsid
BGPR01006520.1_ORF.95	NC_005906.1_YP_025285.1	7.147	11	0.3907	0.007	0.3871	hypothetical protein
BGPR01006520.1_ORF.95	NC_002816.1_NP_148920.1	5.015	11	0.2637	0.007	0.3616	ORF136 similar to XcGV ORF173
BGPR01006520.1_ORF.95	NC_003084.1_NP_203380.1	3.126	11	0.2323	0.007	0.2996	CUN076 hypothetical protein
BGPR01006520.1_ORF.95	NC_003084.1_NP_203345.1	7.582	11	0.4087	0.007	0.3594	CUN042 hypothetical protein
BGPR01006520.1_ORF.95	NC_001973.1_NP_047643.1	6.738	11	0.3844	0.007	0.3611	LdOrf-7 peptide
BGPR01006520.1_ORF.95	NC_003084.1_NP_203346.1	8.043	11	0.4497	0.007	0.4069	CUN041 hypothetical protein
BGPR01006520.1_ORF.95	NC_002816.1_NP_148792.1	7.147	11	0.4254	0.007	0.3312	ORF8 similar to AcMNPV ORF146
BGPR01006520.1_ORF.95	NC_001973.1_NP_047652.1	7.582	11	0.423	0.007	0.3471	LdOrf-16 peptide
BGPR01006520.1_ORF.95	NC_001623.1_NP_054078.1	6.738	11	0.4087	0.007	0.3554	proliferating cell nuclear antigen
BGPR01006520.1_ORF.95	NC_001623.1_NP_054047.1	4.2	11	0.3247	0.007	0.2729	AcOrf-18 peptide
BGPR01006520.1_ORF.95	NC_002816.1_NP_148897.1	6.351	11	0.3249	0.007	0.3883	ORF113 LEF-3
BGPR01006520.1_ORF.95	NC_005906.1_YP_025239.1	5.015	11	0.3165	0.007	0.2994	hypothetical protein
BGPR01006520.1_ORF.95	NC_003084.1_NP_203400.1	4.727	11	0.2702	0.007	0.3309	CUN096 putative lef-4 transcription factor, similar to AcMNPV ORF90
BGPR01006520.1_ORF.95	NC_003084.1_NP_203389.1	4.727	11	0.2898	0.007	0.3495	CUN085 putative occlusion body protein
BGPR01006520.1_ORF.95	NC_001973.1_NP_047720.1	7.147	11	0.4231	0.007	0.3383	DNA polymerase
BGPR01006520.1_ORF.95	NC_001623.1_NP_054083.1	5.32	10	0.3517	0	0.2779	late expression factor 10
BGPR01006520.1_ORF.95	NC_001973.1_NP_047641.1	6.351	10	0.2977	0	0.3698	LdOrf-5 peptide
BGPR01006520.1_ORF.95	NC_001623.1_NP_054177.1	5.644	10	0.3387	0	0.2701	AcOrf-146 peptide
BGPR01006520.1_ORF.95	NC_003084.1_NP_203319.1	7.147	10	0.3167	0	0.3965	CUN015 hypothetical protein
BGPR01006520.1_ORF.95	NC_003084.1_NP_203343.1	4.2	10	0.236	0	0.329	CUN039 hypothetical protein
BGPR01006520.1_ORF.95	NC_002816.1_NP_148915.1	7.147	10	0.3531	0	0.321	ORF131 LEF-8
BGPR01006520.1_ORF.95	NC_002816.1_NP_148921.1	9.049	9	0.4184	0	0.3515	ORF137 LEF-10
BGPR01006520.1_ORF.95	NC_003084.1_NP_203362.1	9.599	9	0.4196	0	0.3659	CUN058 similar to AcMNPV ORF68
BGPR01006520.1_ORF.95	NC_003084.1_NP_203391.1	5.644	9	0.2322	0	0.3685	CUN088 putative lef-5 late expression factor, similar to AcMNPV ORF99
BGPR01006520.1_ORF.95	NC_001973.1_NP_047800.1	7.582	9	0.2973	0	0.347	LdOrf-163 peptide
BGPR01006520.1_ORF.95	NC_002816.1_NP_148904.1	7.147	9	0.2937	0	0.369	ORF120 DNALIGASE
BGPR01006520.1_ORF.95	NC_001623.1_NP_054113.1	4.2	9	0.2248	0	0.2731	viral capsid associated protein
BGPR01006520.1_ORF.95	NC_001973.1_NP_047687.1	4.456	9	0.2528	0	0.2246	late expression factor 8
BGPR01006520.1_ORF.95	NC_003084.1_NP_203330.1	6.738	9	0.2793	0	0.3529	CUN026 putative lef-8 late transcription factor, Rna_Pol_Beta motif, similar to AcMNPV ORF50
BGPR01006520.1_ORF.95	NC_003084.1_NP_203312.1	9.599	8	0.3964	0	0.3233	CUN008 putative vp1054 virion associated assembly protein, similar to AcMNPV ORF54
BGPR01006520.1_ORF.95	NC_005906.1_YP_025283.1	5.32	8	0.1816	0	0.3201	viral capsid associated protein
BGPR01006520.1_ORF.95	NC_001973.1_NP_047728.1	7.147	8	0.2647	0	0.3084	capsid associated protein
BGPR01006520.1_ORF.95	NC_002816.1_NP_148873.1	9.049	7	0.2243	0	0.3395	ORF89 similar to AcMNPV ORF96
BGPR01006520.1_ORF.95	NC_003084.1_NP_203306.1	5.644	7	0.1754	0	0.2707	CUN002 hypothetical protein, ATP_GTP_A motif
BGPR01006520.1_ORF.95	NC_003084.1_NP_203328.1	9.049	7	0.222	0	0.3424	CUN024 putative p39 late capsid coat protein, similar to AcMNPV ORF89
BGPR01006520.1_ORF.95	NC_001973.1_NP_047672.1	9.049	6	0.222	0	0.2844	LdOrf-36 peptide
BGPR01006520.1_ORF.95	NC_001623.1_NP_054111.1	7.582	6	0.1884	0	0.2985	AcOrf-81 peptide
BGPR01006520.1_ORF.95	NC_005906.1_YP_025245.1	9.599	5	0.1888	0	0.3006	hypothetical protein
BGPR01001437.1_ORF.218	NC_003084.1_NP_203344.1	2.681	27	0.7388	0.069	0.5658	CUN040 hypothetical protein
BGPR01001437.1_ORF.218	NC_005906.1_YP_025271.1	1.394	26	0.5131	0.063	0.5224	hypothetical protein
BGPR01001437.1_ORF.218	NC_001623.1_NP_054055.1	1.933	22	0.4481	0.04	0.5108	AcOrf-26 peptide
BGPR01001437.1_ORF.218	NC_001623.1_NP_054151.1	1.933	20	0.4081	0.029	0.4603	AcOrf-121 peptide
BGPR01001437.1_ORF.218	NC_001973.1_NP_047666.1	3.719	17	0.4511	0.016	0.4864	LdOrf-30 peptide
BGPR01001437.1_ORF.218	NC_002816.1_NP_148920.1	1.811	15	0.2676	0.011	0.3696	ORF136 similar to XcGV ORF173
BGPR01001437.1_ORF.218	NC_005906.1_YP_025269.1	2.352	15	0.3219	0.011	0.3921	hypothetical protein
BGPR01001437.1_ORF.218	NC_002816.1_NP_148907.1	0.9413	15	0.2096	0.011	0.3451	ORF123 FGF
BGPR01001437.1_ORF.218	NC_002816.1_NP_148846.1	1.005	14	0.1497	0.01	0.4125	ORF62 similar to PxGV ORF50
BGPR01001437.1_ORF.218	NC_002816.1_NP_148802.1	5.506	14	0.4573	0.01	0.4587	ORF18 ODV-E56
BGPR01001437.1_ORF.218	NC_003084.1_NP_203384.1	1.811	14	0.2257	0.01	0.3797	CUN080 hypothetical protein
BGPR01001437.1_ORF.218	NC_001623.1_NP_054113.1	4.831	14	0.4001	0.01	0.496	viral capsid associated protein
BGPR01001437.1_ORF.218	NC_003084.1_NP_203366.1	1.005	13	0.1418	0.009	0.4141	CUN062 hypothetical protein
BGPR01001437.1_ORF.218	NC_003084.1_NP_203400.1	2.863	13	0.2613	0.009	0.4086	CUN096 putative lef-4 transcription factor, similar to AcMNPV ORF90
BGPR01001437.1_ORF.218	NC_003084.1_NP_203339.1	4.239	13	0.3358	0.009	0.4122	CUN035 putative p91 capsid virion protein, similar to AcMNPV ORF83
BGPR01001437.1_ORF.218	NC_002816.1_NP_148895.1	4.525	13	0.4701	0.009	0.3514	ORF111 DNAPOL
BGPR01001437.1_ORF.218	NC_002816.1_NP_148863.1	4.831	12	0.3829	0.008	0.3635	ORF79 similar to AcMNPV ORF150
BGPR01001437.1_ORF.218	NC_002816.1_NP_148897.1	3.263	12	0.3273	0.008	0.3036	ORF113 LEF-3
BGPR01001437.1_ORF.218	NC_002816.1_NP_148844.1	1.073	12	0.1308	0.008	0.3861	ORF60 P74
BGPR01001437.1_ORF.218	NC_003084.1_NP_203351.1	5.157	11	0.353	0.007	0.3679	CUN047 hypothetical protein
BGPR01001437.1_ORF.218	NC_001973.1_NP_047672.1	5.506	11	0.4028	0.007	0.3663	LdOrf-36 peptide
BGPR01001437.1_ORF.218	NC_003084.1_NP_203367.1	3.056	11	0.1999	0.007	0.4001	CUN063 hypothetical protein
BGPR01001437.1_ORF.218	NC_001623.1_NP_054061.1	8.149	11	0.6545	0.007	0.3325	fibroblast growth factor
BGPR01001437.1_ORF.218	NC_002816.1_NP_148878.1	2.681	11	0.2013	0.007	0.3642	ORF94 IAP
BGPR01001437.1_ORF.218	NC_002816.1_NP_148927.1	3.056	11	0.2389	0.007	0.3423	ORF143 ME53
BGPR01001437.1_ORF.218	NC_001623.1_NP_054047.1	3.056	10	0.2313	0	0.3084	AcOrf-18 peptide
BGPR01001437.1_ORF.218	NC_001973.1_NP_047754.1	7.151	9	0.3201	0	0.3655	LdOrf-117 peptide
BGPR01001437.1_ORF.218	NC_001623.1_NP_054124.1	6.699	9	0.3406	0	0.3072	occlusion-derived virus envelope protein
BGPR01001437.1_ORF.218	NC_001973.1_NP_047775.1	9.912	9	0.47	0	0.417	LdOrf-138 peptide
BGPR01001437.1_ORF.218	NC_002816.1_NP_148922.1	6.699	9	0.3789	0	0.2996	ORF138 VP1054
BGPR01001437.1_ORF.218	NC_001973.1_NP_047718.1	2.863	9	0.166	0	0.3091	late expression factor 3
BGPR01001437.1_ORF.218	NC_005906.1_YP_025258.1	1.811	9	0.1068	0	0.3706	helicase
BGPR01001437.1_ORF.218	NC_002816.1_NP_148810.1	4.239	8	0.1791	0	0.3427	ORF26
BGPR01001437.1_ORF.218	NC_003084.1_NP_203364.1	4.831	8	0.2437	0	0.2682	CUN060 hypothetical protein
BGPR01001437.1_ORF.218	NC_005906.1_YP_025213.1	9.912	8	0.3867	0	0.392	hypothetical protein
BGPR01001437.1_ORF.218	NC_002816.1_NP_148865.1	6.699	8	0.3398	0	0.2712	ORF81 DBP
BGPR01001437.1_ORF.218	NC_001973.1_NP_047795.1	5.157	8	0.2287	0	0.3028	LdOrf-158 peptide
BGPR01001437.1_ORF.218	NC_001973.1_NP_047663.1	3.719	8	0.1757	0	0.3325	envelope protein p74
BGPR01001437.1_ORF.218	NC_005906.1_YP_025285.1	9.912	7	0.3885	0	0.3163	hypothetical protein
BGPR01001437.1_ORF.218	NC_001973.1_NP_047726.1	6.699	7	0.2509	0	0.3193	LdOrf-81 peptide
BGPR01001437.1_ORF.218	NC_003084.1_NP_203376.1	5.878	7	0.1484	0	0.4193	CUN072 hypothetical protein
BGPR01001437.1_ORF.218	NC_001623.1_NP_054078.1	7.634	7	0.2858	0	0.2964	proliferating cell nuclear antigen
BGPR01001437.1_ORF.218	NC_003084.1_NP_203382.1	9.912	6	0.268	0	0.3084	CUN078 hypothetical protein
BGPR01001437.1_ORF.218	NC_003084.1_NP_203380.1	7.634	6	0.2225	0	0.2501	CUN076 hypothetical protein
BGPR01001437.1_ORF.218	NC_002816.1_NP_148833.1	7.634	6	0.1647	0	0.389	ORF49 similar to XcGV ORF46
BGPR01001437.1_ORF.218	NC_005906.1_YP_025204.1	6.699	6	0.1598	0	0.2932	hypothetical protein
BGPR01001437.1_ORF.218	NC_005906.1_YP_025266.1	9.912	6	0.2705	0	0.309	hypothetical protein
BGPR01001437.1_ORF.218	NC_002816.1_NP_148857.1	5.878	6	0.1482	0	0.3532	ORF73 38.7KD
BGPR01001437.1_ORF.218	NC_003084.1_NP_203343.1	9.286	6	0.3196	0	0.2791	CUN039 hypothetical protein
BGPR01001437.1_ORF.218	NC_003084.1_NP_203328.1	7.151	6	0.1636	0	0.381	CUN024 putative p39 late capsid coat protein, similar to AcMNPV ORF89
BGPR01001437.1_ORF.218	NC_001623.1_NP_054069.1	5.506	6	0.1286	0	0.3004	transcription regulator
BGPR01001437.1_ORF.218	NC_005906.1_YP_025259.1	7.151	6	0.1828	0	0.3081	late expression factor-4
BGPR01001437.1_ORF.218	NC_002816.1_NP_148901.1	6.699	6	0.1826	0	0.2778	ORF117 LEF-9
BGPR01001437.1_ORF.218	NC_002816.1_NP_148885.1	6.699	6	0.1367	0	0.3909	ORF101 VP91 capsid
BGPR01001437.1_ORF.218	NC_002816.1_NP_148896.1	8.699	6	0.1754	0	0.3841	ORF112 DESMOPLAKIN
BGPR01001437.1_ORF.218	NC_001623.1_NP_054147.1	6.699	5	0.1384	0	0.3154	AcOrf-117 peptide
BGPR01001437.1_ORF.218	NC_001973.1_NP_047670.1	6.699	5	0.1324	0	0.2732	LdOrf-34 peptide
BGPR01001437.1_ORF.218	NC_002816.1_NP_148801.1	8.699	5	0.1302	0	0.3555	ORF17 IAP-3
BGPR01001437.1_ORF.218	NC_002816.1_NP_148900.1	7.634	5	0.1157	0	0.3327	ORF116 IAP-5
BGPR01001437.1_ORF.218	NC_001623.1_NP_054042.1	9.912	5	0.2	0	0.3074	AcOrf-13 peptide
BGPR01001437.1_ORF.218	NC_003084.1_NP_203386.1	9.286	5	0.1982	0	0.3023	CUN082 hypothetical protein
BGPR01001437.1_ORF.218	NC_003084.1_NP_203363.1	8.699	5	0.13	0	0.3963	CUN059 putative lef-9 transcription factor, RNApol motif, similar to AcMNPV ORF62
BGPR01001437.1_ORF.218	NC_003084.1_NP_203412.1	5.878	5	0.1079	0	0.3603	CUN108 putative bro protein, ATP_GTP_A motif, similar to AcMNPV ORF2
BGPR01001437.1_ORF.218	NC_003084.1_NP_203320.1	7.634	4	0.1167	0	0.3095	CUN016 hypothetical protein
BGPR01001437.1_ORF.218	NC_001623.1_NP_054120.1	8.699	4	0.14	0	0.2774	late expression factor 4
BGPR01062732.1_ORF.16	NC_001623.1_NP_054103.1	0.7198	23	0.2941	0.045	0.3985	AcOrf-73 peptide
BGPR01062732.1_ORF.16	NC_005906.1_YP_025263.1	0.5081	21	0.213	0.034	0.3888	occlusion-derived virus envelope/capsid protein
BGPR01062732.1_ORF.16	NC_003084.1_NP_203326.1	0.7629	18	0.1814	0.02	0.3987	CUN022 hypothetical protein
BGPR01062732.1_ORF.16	NC_001623.1_NP_054172.1	1.081	15	0.1751	0.011	0.3643	hypothetical protein
BGPR01062732.1_ORF.16	NC_003084.1_NP_203411.1	4.614	12	0.2693	0.008	0.3784	CUN107 hypothetical protein
BGPR01062732.1_ORF.16	NC_003084.1_NP_203321.1	3.257	11	0.1921	0.007	0.3473	CUN017 hypothetical protein
BGPR01062732.1_ORF.16	NC_001973.1_NP_047768.1	2.736	11	0.1962	0.007	0.2888	Ld-odv-e66
BGPR01062732.1_ORF.16	NC_001973.1_NP_047685.1	7.339	10	0.2903	0	0.3849	LdOrf-49 peptide
BGPR01062732.1_ORF.16	NC_003084.1_NP_203366.1	3.658	10	0.1762	0	0.3549	CUN062 hypothetical protein
BGPR01062732.1_ORF.16	NC_001623.1_NP_054122.1	2.736	10	0.1619	0	0.3183	AcOrf-92 peptide
BGPR01062732.1_ORF.16	NC_001973.1_NP_047700.1	5.182	9	0.1751	0	0.3736	Ld-FP'
BGPR01062732.1_ORF.16	NC_001973.1_NP_047680.1	3.877	9	0.1246	0	0.39	Ld-39K/pp31
BGPR01062732.1_ORF.16	NC_002816.1_NP_148857.1	9.805	8	0.2735	0	0.3973	ORF73 38.7KD
BGPR01062732.1_ORF.16	NC_002816.1_NP_148871.1	4.354	8	0.1396	0	0.3388	ORF87 LEF-5
BGPR01062732.1_ORF.16	NC_003084.1_NP_203407.1	7.339	8	0.2206	0	0.3375	CUN103 hypothetical protein
BGPR01062732.1_ORF.16	NC_001623.1_NP_054184.1	5.819	8	0.1714	0	0.3663	hypothetical protein
BGPR01062732.1_ORF.16	NC_001973.1_NP_047723.1	4.89	8	0.1414	0	0.3581	very late factor 1
BGPR01062732.1_ORF.16	NC_003084.1_NP_203396.1	3.257	8	0.1164	0	0.3128	CUN091 putative dnapolymerase, similar to AcMNPV ORF65
BGPR01062732.1_ORF.16	NC_005906.1_YP_025212.1	9.253	7	0.209	0	0.3511	late expression factor-11
BGPR01062732.1_ORF.16	NC_001973.1_NP_047657.1	8.733	7	0.1959	0	0.365	immediate early transactivator 0
BGPR01062732.1_ORF.16	NC_003084.1_NP_203334.1	6.535	7	0.1442	0	0.335	CUN030 similar to AcMNPV ORF142
BGPR01062732.1_ORF.16	NC_005906.1_YP_025258.1	6.926	7	0.1474	0	0.3643	helicase
BGPR01062732.1_ORF.16	NC_002816.1_NP_148786.1	8.733	6	0.1698	0	0.3828	ORF2 similar to XcGV ORF2
BGPR01062732.1_ORF.16	NC_003084.1_NP_203325.1	7.339	5	0.1882	0	0.2068	CUN021 hypothetical protein
BGPR01062732.1_ORF.16	NC_002816.1_NP_148846.1	7.777	5	0.1245	0	0.3271	ORF62 similar to PxGV ORF50
BGPR01062732.1_ORF.16	NC_001973.1_NP_047664.1	8.733	5	0.1213	0	0.3248	LdOrf-28 peptide
BGPR01036730.1_ORF.9	NC_003084.1_NP_203386.1	0.8806	27	0.3558	0.069	0.6215	CUN082 hypothetical protein
BGPR01036730.1_ORF.9	NC_001973.1_NP_047750.1	0.678	25	0.2899	0.057	0.5767	Ld-bro-i
BGPR01036730.1_ORF.9	NC_001623.1_NP_054184.1	1.304	22	0.3047	0.04	0.568	hypothetical protein
BGPR01036730.1_ORF.9	NC_001973.1_NP_047798.1	4.82	19	0.4997	0.024	0.708	Ld-bro-p
BGPR01036730.1_ORF.9	NC_003084.1_NP_203406.1	2.676	19	0.3097	0.024	0.6617	CUN102 putative odv-e56 envelope protein, similar to AcMNPV ORF148
BGPR01036730.1_ORF.9	NC_001973.1_NP_047790.1	6.682	18	0.58	0.02	0.7872	Ld-bro-n
BGPR01036730.1_ORF.9	NC_001623.1_NP_054133.1	3.962	18	0.458	0.02	0.5538	hypothetical protein
BGPR01036730.1_ORF.9	NC_003084.1_NP_203314.1	7.133	17	0.5757	0.016	0.743	CUN010 hypothetical protein
BGPR01036730.1_ORF.9	NC_001973.1_NP_047641.1	3.476	15	0.3185	0.011	0.5371	LdOrf-5 peptide
BGPR01036730.1_ORF.9	NC_001623.1_NP_054177.1	5.146	15	0.3549	0.011	0.6406	AcOrf-146 peptide
BGPR01036730.1_ORF.9	NC_002816.1_NP_148897.1	7.615	15	0.4797	0.011	0.7741	ORF113 LEF-3
BGPR01036730.1_ORF.9	NC_001623.1_NP_054126.1	6.682	14	0.3637	0.01	0.7159	AcOrf-96 peptide
BGPR01036730.1_ORF.9	NC_005906.1_YP_025239.1	4.82	14	0.3122	0.01	0.6142	hypothetical protein
BGPR01036730.1_ORF.9	NC_005906.1_YP_025237.1	5.146	14	0.4095	0.01	0.504	late expression factor-9
BGPR01036730.1_ORF.9	NC_001973.1_NP_047741.1	4.229	13	0.3424	0.009	0.4329	LdOrf-104 peptide
BGPR01036730.1_ORF.9	NC_001973.1_NP_047708.1	5.864	13	0.3277	0.009	0.6263	Ld-bro-c
BGPR01036730.1_ORF.9	NC_002816.1_NP_148785.1	5.864	12	0.3519	0.008	0.5011	ORF1 granulin
BGPR01036730.1_ORF.9	NC_002816.1_NP_148922.1	7.133	12	0.3625	0.008	0.6099	ORF138 VP1054
BGPR01036730.1_ORF.9	NC_001973.1_NP_047794.1	9.261	12	0.4299	0.008	0.6659	alkaline exonuclease
BGPR01036730.1_ORF.9	NC_003084.1_NP_203389.1	5.864	12	0.3204	0.008	0.5396	CUN085 putative occlusion body protein
BGPR01036730.1_ORF.9	NC_003084.1_NP_203313.1	9.261	11	0.3987	0.007	0.6448	CUN009 hypothetical protein
BGPR01036730.1_ORF.9	NC_001623.1_NP_054185.1	7.133	11	0.353	0.007	0.5549	AcOrf-154 peptide
BGPR01036730.1_ORF.9	NC_001973.1_NP_047793.1	8.128	11	0.4205	0.007	0.5325	fibroblast growth factor
BGPR01036730.1_ORF.9	NC_001623.1_NP_054031.1	9.261	11	0.3739	0.007	0.6502	baculovirus repeated ORF
BGPR01036730.1_ORF.9	NC_003084.1_NP_203409.1	6.682	10	0.2759	0	0.4921	CUN105 hypothetical protein
BGPR01036730.1_ORF.9	NC_001623.1_NP_054074.1	9.261	10	0.3272	0	0.6498	AcOrf-45 peptide
BGPR01036730.1_ORF.9	NC_001623.1_NP_054129.1	7.615	10	0.3317	0	0.4851	late expression factor 5
BGPR01036730.1_ORF.9	NC_001623.1_NP_054042.1	9.261	10	0.3251	0	0.6529	AcOrf-13 peptide
BGPR01036730.1_ORF.9	NC_001973.1_NP_047662.1	6.682	9	0.2511	0	0.4136	LdOrf-26 peptide
BGPR01036730.1_ORF.9	NC_001623.1_NP_054086.1	7.133	9	0.2327	0	0.505	AcOrf-56 peptide
BGPR01036730.1_ORF.9	NC_003084.1_NP_203354.1	7.615	9	0.3447	0	0.4102	CUN050 hypothetical protein
BGPR01036730.1_ORF.9	NC_001973.1_NP_047714.1	9.261	9	0.3845	0	0.4374	LdOrf-77 peptide
BGPR01036730.1_ORF.9	NC_003084.1_NP_203401.1	9.885	9	0.3141	0	0.6022	CUN097 hypothetical protein
BGPR01036730.1_ORF.9	NC_003084.1_NP_203334.1	9.885	9	0.3618	0	0.5568	CUN030 similar to AcMNPV ORF142
BGPR01036730.1_ORF.9	NC_003084.1_NP_203331.1	7.615	8	0.2475	0	0.4472	CUN027 hypothetical protein
BGPR01036730.1_ORF.9	NC_002816.1_NP_148792.1	9.261	8	0.274	0	0.5123	ORF8 similar to AcMNPV ORF146
BGPR01036730.1_ORF.9	NC_002816.1_NP_148867.1	8.676	8	0.3199	0	0.4217	ORF83 similar to AcMNPV ORF103
BGPR01036730.1_ORF.9	NC_003084.1_NP_203413.1	9.261	7	0.2277	0	0.4996	CUN109 putative bro protein, ATP_GTP_A motif, similar to AcMNPV ORF2
BGPR01036730.1_ORF.9	NC_005906.1_YP_025283.1	8.676	7	0.2189	0	0.4285	viral capsid associated protein
BGPR01001437.1_ORF.289	NC_005906.1_YP_025201.1	4.975	14	0.4633	0.01	0.762	hypothetical protein
BGPR01001437.1_ORF.289	NC_002816.1_NP_148868.1	5.879	11	0.3536	0.007	0.7183	ORF84 similar to AcMNPV ORF102
BGPR01001437.1_ORF.289	NC_001973.1_NP_047695.1	7.55	8	0.3173	0	0.5464	LdOrf-59 peptide
BGPR01003736.1_ORF.154	NC_003084.1_NP_203353.1	2.777	21	0.4906	0.034	0.4505	CUN049 hypothetical protein
BGPR01003736.1_ORF.154	NC_003084.1_NP_203405.1	6.466	17	0.7101	0.016	0.4717	CUN101 hypothetical protein
BGPR01003736.1_ORF.154	NC_002816.1_NP_148788.1	4.781	17	0.5791	0.016	0.4262	ORF4 similar to XcGV ORF7
BGPR01003736.1_ORF.154	NC_001973.1_NP_047781.1	0.6136	15	0.1982	0.011	0.2339	LdOrf-144 peptide
BGPR01003736.1_ORF.154	NC_003084.1_NP_203367.1	0.512	15	0.175	0.011	0.2637	CUN063 hypothetical protein
BGPR01003736.1_ORF.154	NC_002816.1_NP_148917.1	6.466	14	0.5061	0.01	0.4525	ORF133 similar to XcGV ORF170
BGPR01003736.1_ORF.154	NC_002816.1_NP_148824.1	2.181	14	0.3402	0.01	0.2531	ORF40
BGPR01003736.1_ORF.154	NC_001973.1_NP_047729.1	2.614	14	0.3121	0.01	0.3187	capsid protein
BGPR01003736.1_ORF.154	NC_001623.1_NP_054131.1	0.8816	14	0.1861	0.01	0.273	hypothetical protein
BGPR01003736.1_ORF.154	NC_002816.1_NP_148826.1	5.731	13	0.3903	0.009	0.4298	ORF42 similar to XcGV ORF36
BGPR01003736.1_ORF.154	NC_003084.1_NP_203347.1	3.133	13	0.2677	0.009	0.3459	CUN043 hypothetical protein
BGPR01003736.1_ORF.154	NC_001623.1_NP_054091.1	4.501	13	0.573	0.009	0.2163	FP protein
BGPR01003736.1_ORF.154	NC_003084.1_NP_203366.1	1.345	13	0.204	0.009	0.2744	CUN062 hypothetical protein
BGPR01003736.1_ORF.154	NC_001973.1_NP_047718.1	2.461	13	0.3992	0.009	0.2072	late expression factor 3
BGPR01003736.1_ORF.154	NC_001623.1_NP_054069.1	0.6136	13	0.1251	0.009	0.285	transcription regulator
BGPR01003736.1_ORF.154	NC_001973.1_NP_047742.1	0.9365	13	0.1471	0.009	0.3243	Ld-vp80
BGPR01003736.1_ORF.154	NC_001973.1_NP_047662.1	2.614	12	0.4088	0.008	0.175	LdOrf-26 peptide
BGPR01003736.1_ORF.154	NC_001973.1_NP_047748.1	4.501	12	0.487	0.008	0.2272	LdOrf-111 peptide
BGPR01003736.1_ORF.154	NC_001623.1_NP_054117.1	1.122	12	0.1639	0.008	0.2729	p15
BGPR01003736.1_ORF.154	NC_005906.1_YP_025282.1	3.536	12	0.2801	0.008	0.3507	hypothetical protein
BGPR01003736.1_ORF.154	NC_002816.1_NP_148852.1	0.4537	12	0.1086	0.008	0.276	ORF68 P47
BGPR01003736.1_ORF.154	NC_001973.1_NP_047768.1	4.501	12	0.5047	0.008	0.211	Ld-odv-e66
BGPR01003736.1_ORF.154	NC_001623.1_NP_054181.1	2.317	11	0.2137	0.007	0.2892	AcOrf-150 peptide
BGPR01003736.1_ORF.154	NC_001623.1_NP_054093.1	5.731	11	0.3271	0.007	0.3433	AcOrf-63 peptide
BGPR01003736.1_ORF.154	NC_002816.1_NP_148865.1	3.989	11	0.41	0.007	0.2022	ORF81 DBP
BGPR01003736.1_ORF.154	NC_002816.1_NP_148869.1	2.95	11	0.2026	0.007	0.3361	ORF85 similar to AcMNPV ORF101
BGPR01003736.1_ORF.154	NC_005906.1_YP_025283.1	4.238	11	0.4642	0.007	0.1834	viral capsid associated protein
BGPR01003736.1_ORF.154	NC_003084.1_NP_203398.1	6.868	10	0.3698	0	0.3507	CUN094 hypothetical protein
BGPR01003736.1_ORF.154	NC_003084.1_NP_203364.1	3.536	10	0.2396	0	0.2617	CUN060 hypothetical protein
BGPR01003736.1_ORF.154	NC_002816.1_NP_148786.1	3.989	10	0.2283	0	0.3344	ORF2 similar to XcGV ORF2
BGPR01003736.1_ORF.154	NC_002816.1_NP_148814.1	1.933	10	0.1449	0	0.2699	ORF30 similar to XcGV ORF26
BGPR01003736.1_ORF.154	NC_001623.1_NP_054124.1	3.328	10	0.2198	0	0.2668	occlusion-derived virus envelope protein
BGPR01003736.1_ORF.154	NC_001623.1_NP_054119.1	4.238	10	0.2402	0	0.3116	major viral capsid protein
BGPR01003736.1_ORF.154	NC_002816.1_NP_148811.1	1.267	10	0.1392	0	0.2509	ORF27
BGPR01003736.1_ORF.154	NC_001973.1_NP_047649.1	6.466	9	0.2682	0	0.3148	LdOrf-13 peptide
BGPR01003736.1_ORF.154	NC_002816.1_NP_148921.1	7.748	9	0.3543	0	0.3014	ORF137 LEF-10
BGPR01003736.1_ORF.154	NC_002816.1_NP_148833.1	4.238	9	0.215	0	0.3122	ORF49 similar to XcGV ORF46
BGPR01003736.1_ORF.154	NC_002816.1_NP_148902.1	3.536	9	0.2283	0	0.2281	ORF118 FP
BGPR01003736.1_ORF.154	NC_001973.1_NP_047788.1	5.731	9	0.4879	0	0.172	LdOrf-151 peptide
BGPR01003736.1_ORF.154	NC_001973.1_NP_047759.1	1.933	9	0.1425	0	0.2367	LdOrf-122 peptide
BGPR01003736.1_ORF.154	NC_005906.1_YP_025265.1	3.536	9	0.2042	0	0.2373	late expression factor-1
BGPR01003736.1_ORF.154	NC_002816.1_NP_148866.1	2.777	9	0.1478	0	0.3184	ORF82 similar to XcGV ORF90
BGPR01003736.1_ORF.154	NC_001623.1_NP_054139.1	1.518	9	0.1211	0	0.2545	AcOrf-109 peptide
BGPR01003736.1_ORF.154	NC_005906.1_YP_025231.1	1.82	9	0.1306	0	0.2664	unkown
BGPR01003736.1_ORF.154	NC_003084.1_NP_203309.1	3.328	9	0.1556	0	0.2986	CUN005 putative bro protein, similar to AcMNPV ORF2
BGPR01003736.1_ORF.154	NC_001623.1_NP_054168.1	6.087	9	0.2527	0	0.3587	occlusion-derived virus envelope protein
BGPR01003736.1_ORF.154	NC_002816.1_NP_148885.1	5.079	9	0.4304	0	0.179	ORF101 VP91 capsid
BGPR01003736.1_ORF.154	NC_001623.1_NP_054164.1	0.6518	9	0.1008	0	0.1919	hypothetical protein
BGPR01003736.1_ORF.154	NC_001623.1_NP_054095.1	0.9948	9	0.1111	0	0.2228	DNA-dependant DNA-polymerase
BGPR01003736.1_ORF.154	NC_002816.1_NP_148849.1	4.501	8	0.2174	0	0.2289	ORF65 similar to AcMNPV ORF79
BGPR01003736.1_ORF.154	NC_001973.1_NP_047666.1	6.087	8	0.2398	0	0.3015	LdOrf-30 peptide
BGPR01003736.1_ORF.154	NC_001623.1_NP_054147.1	6.868	8	0.3133	0	0.2348	AcOrf-117 peptide
BGPR01003736.1_ORF.154	NC_001623.1_NP_054048.1	8.229	8	0.2692	0	0.3467	AcOrf-19 peptide
BGPR01003736.1_ORF.154	NC_003084.1_NP_203380.1	2.777	8	0.1598	0	0.2104	CUN076 hypothetical protein
BGPR01003736.1_ORF.154	NC_005906.1_YP_025230.1	5.395	8	0.2575	0	0.2662	hypothetical protein
BGPR01003736.1_ORF.154	NC_001623.1_NP_054033.1	8.229	8	0.3136	0	0.3212	AcOrf-4 peptide
BGPR01003736.1_ORF.154	NC_003084.1_NP_203343.1	7.748	8	0.4495	0	0.2005	CUN039 hypothetical protein
BGPR01003736.1_ORF.154	NC_003084.1_NP_203376.1	4.238	8	0.1626	0	0.2752	CUN072 hypothetical protein
BGPR01003736.1_ORF.154	NC_001623.1_NP_054043.1	2.317	8	0.1468	0	0.2042	late expression factor 1
BGPR01003736.1_ORF.154	NC_001973.1_NP_047755.1	2.777	8	0.1466	0	0.236	LdOrf-118 peptide
BGPR01003736.1_ORF.154	NC_001973.1_NP_047773.1	9.859	8	0.3208	0	0.3759	polyhedral calyx protein
BGPR01003736.1_ORF.154	NC_001623.1_NP_054107.1	8.741	8	0.2915	0	0.3791	very late expression factor 1
BGPR01003736.1_ORF.154	NC_001623.1_NP_054133.1	5.079	8	0.1979	0	0.2922	hypothetical protein
BGPR01003736.1_ORF.154	NC_005906.1_YP_025246.1	2.461	8	0.1167	0	0.2971	hypothetical protein
BGPR01003736.1_ORF.154	NC_001973.1_NP_047684.1	1.192	8	0.08555	0	0.2201	Ld-p47
BGPR01003736.1_ORF.154	NC_001973.1_NP_047751.1	4.238	8	0.1843	0	0.282	Ld-bro-j
BGPR01003736.1_ORF.154	NC_005906.1_YP_025250.1	6.466	8	0.2699	0	0.3083	hypothetical protein
BGPR01003736.1_ORF.154	NC_001623.1_NP_054135.1	6.868	8	0.2496	0	0.3322	hypothetical protein
BGPR01003736.1_ORF.154	NC_003084.1_NP_203408.1	2.461	8	0.1373	0	0.2173	CUN104 putative Ld130 envelope fusion protein, similar to AcMNPV ORF23
BGPR01003736.1_ORF.154	NC_001973.1_NP_047702.1	4.238	8	0.1678	0	0.2661	viral enhancing factor 1
BGPR01003736.1_ORF.154	NC_003084.1_NP_203389.1	3.536	8	0.1514	0	0.254	CUN085 putative occlusion body protein
BGPR01003736.1_ORF.154	NC_001973.1_NP_047722.1	7.748	7	0.2356	0	0.3311	LdOrf-85 peptide
BGPR01003736.1_ORF.154	NC_001973.1_NP_047653.1	8.741	7	0.2693	0	0.3004	LdOrf-17 peptide
BGPR01003736.1_ORF.154	NC_001623.1_NP_054109.1	6.087	7	0.2615	0	0.2038	AcOrf-79 peptide
BGPR01003736.1_ORF.154	NC_001973.1_NP_047772.1	6.087	7	0.2028	0	0.3045	LdOrf-135 peptide
BGPR01003736.1_ORF.154	NC_001623.1_NP_054105.1	6.868	7	0.1952	0	0.2924	AcOrf-75 peptide
BGPR01003736.1_ORF.154	NC_001973.1_NP_047696.1	6.466	7	0.203	0	0.2552	LdOrf-60 peptide
BGPR01003736.1_ORF.154	NC_001973.1_NP_047660.1	9.283	7	0.2774	0	0.3677	LdOrf-24 peptide
BGPR01003736.1_ORF.154	NC_002816.1_NP_148886.1	4.501	7	0.3069	0	0.1305	ORF102 TLP20
BGPR01003736.1_ORF.154	NC_003084.1_NP_203306.1	5.731	7	0.177	0	0.2675	CUN002 hypothetical protein, ATP_GTP_A motif
BGPR01003736.1_ORF.154	NC_001973.1_NP_047760.1	5.079	7	0.161	0	0.2533	late expression factor 1
BGPR01003736.1_ORF.154	NC_002816.1_NP_148858.1	3.989	7	0.1606	0	0.2275	ORF74 LEF-1
BGPR01003736.1_ORF.154	NC_001623.1_NP_054039.1	5.079	7	0.23	0	0.1822	protein kinase
BGPR01003736.1_ORF.154	NC_005906.1_YP_025236.1	2.777	7	0.142	0	0.1961	hypothetical protein
BGPR01003736.1_ORF.154	NC_001623.1_NP_054080.1	6.466	7	0.2281	0	0.289	AcOrf-51 peptide
BGPR01003736.1_ORF.154	NC_001973.1_NP_047750.1	5.079	7	0.1954	0	0.2609	Ld-bro-i
BGPR01003736.1_ORF.154	NC_001623.1_NP_054047.1	6.087	7	0.1786	0	0.2851	AcOrf-18 peptide
BGPR01003736.1_ORF.154	NC_003084.1_NP_203412.1	6.868	7	0.2171	0	0.2774	CUN108 putative bro protein, ATP_GTP_A motif, similar to AcMNPV ORF2
BGPR01003736.1_ORF.154	NC_005906.1_YP_025247.1	6.868	7	0.1779	0	0.3258	p74
BGPR01003736.1_ORF.154	NC_001973.1_NP_047766.1	3.133	7	0.1175	0	0.2298	LdOrf-129 peptide
BGPR01003736.1_ORF.154	NC_003084.1_NP_203356.1	9.859	6	0.2354	0	0.3164	CUN051 hypothetical protein
BGPR01003736.1_ORF.154	NC_002816.1_NP_148864.1	7.295	6	0.2988	0	0.1758	ORF80 LEF-6
BGPR01003736.1_ORF.154	NC_003084.1_NP_203383.1	5.731	6	0.264	0	0.1279	CUN079 hypothetical protein
BGPR01003736.1_ORF.154	NC_001973.1_NP_047721.1	9.859	6	0.222	0	0.3387	LdOrf-84 peptide
BGPR01003736.1_ORF.154	NC_003084.1_NP_203318.1	9.859	6	0.2513	0	0.332	CUN013 hypothetical protein
BGPR01003736.1_ORF.154	NC_002816.1_NP_148863.1	7.295	6	0.1831	0	0.292	ORF79 similar to AcMNPV ORF150
BGPR01003736.1_ORF.154	NC_001623.1_NP_054087.1	7.748	6	0.2375	0	0.2195	AcOrf-57 peptide
BGPR01003736.1_ORF.154	NC_002816.1_NP_148899.1	3.536	6	0.1092	0	0.2388	ORF115 similar to XcGV ORF136
BGPR01003736.1_ORF.154	NC_002816.1_NP_148887.1	5.731	6	0.1397	0	0.2629	ORF103 similar to AcMNPV ORF81
BGPR01003736.1_ORF.154	NC_001973.1_NP_047733.1	6.868	6	0.1836	0	0.2488	Ld-odv-e25 peptide
BGPR01003736.1_ORF.154	NC_001973.1_NP_047727.1	4.781	6	0.1522	0	0.1982	LdOrf-82 peptide
BGPR01003736.1_ORF.154	NC_005906.1_YP_025275.1	3.328	6	0.09794	0	0.2386	hypothetical protein
BGPR01003736.1_ORF.154	NC_001973.1_NP_047737.1	4.781	6	0.1467	0	0.2333	late expression factor 5
BGPR01003736.1_ORF.154	NC_005906.1_YP_025286.1	6.868	6	0.1977	0	0.2665	hypothetical protein
BGPR01003736.1_ORF.154	NC_001973.1_NP_047795.1	9.859	6	0.3837	0	0.2017	LdOrf-158 peptide
BGPR01003736.1_ORF.154	NC_005906.1_YP_025221.1	9.283	6	0.2748	0	0.2759	hypothetical protein
BGPR01003736.1_ORF.154	NC_001623.1_NP_054169.1	8.741	6	0.2821	0	0.2231	DNA synthesis regulator
BGPR01003736.1_ORF.154	NC_001973.1_NP_047656.1	8.741	6	0.2529	0	0.2146	LdOrf-20 peptide
BGPR01003736.1_ORF.154	NC_001973.1_NP_047709.1	3.756	6	0.1059	0	0.2165	Ld-bro-d
BGPR01003736.1_ORF.154	NC_002816.1_NP_148904.1	6.868	6	0.1551	0	0.2664	ORF120 DNALIGASE
BGPR01003736.1_ORF.154	NC_001973.1_NP_047767.1	5.079	6	0.134	0	0.255	envelope protein
BGPR01003736.1_ORF.154	NC_001623.1_NP_054116.1	7.748	6	0.1874	0	0.2689	polynucleotide kinase/ligase
BGPR01003736.1_ORF.154	NC_003084.1_NP_203330.1	4.238	6	0.1462	0	0.2191	CUN026 putative lef-8 late transcription factor, Rna_Pol_Beta motif, similar to AcMNPV ORF50
BGPR01003736.1_ORF.154	NC_002816.1_NP_148874.1	9.859	6	0.2376	0	0.2818	ORF90 HELICASE
BGPR01003736.1_ORF.154	NC_001623.1_NP_054058.1	9.859	5	0.254	0	0.2408	AcOrf-29 peptide
BGPR01003736.1_ORF.154	NC_005906.1_YP_025209.1	8.741	5	0.2758	0	0.1501	hypothetical protein
BGPR01003736.1_ORF.154	NC_003084.1_NP_203331.1	7.748	5	0.1747	0	0.224	CUN027 hypothetical protein
BGPR01003736.1_ORF.154	NC_003084.1_NP_203397.1	9.859	5	0.201	0	0.2629	CUN093 hypothetical protein
BGPR01003736.1_ORF.154	NC_001973.1_NP_047661.1	8.741	5	0.1921	0	0.1973	LdOrf-25 peptide
BGPR01003736.1_ORF.154	NC_002816.1_NP_148882.1	9.283	5	0.1825	0	0.2659	ORF98 PTP-2
BGPR01003736.1_ORF.154	NC_003084.1_NP_203355.1	6.868	5	0.1335	0	0.2395	CUN052 hypothetical protein
BGPR01003736.1_ORF.154	NC_005906.1_YP_025251.1	6.466	5	0.1125	0	0.252	hypothetical protein
BGPR01003736.1_ORF.154	NC_001973.1_NP_047764.1	8.229	5	0.1443	0	0.2493	LdOrf-127 peptide
BGPR01003736.1_ORF.154	NC_002816.1_NP_148792.1	6.466	5	0.1637	0	0.1875	ORF8 similar to AcMNPV ORF146
BGPR01003736.1_ORF.154	NC_001623.1_NP_054159.1	8.229	5	0.1475	0	0.2825	viral capsid protein
BGPR01003736.1_ORF.154	NC_001623.1_NP_054177.1	9.283	5	0.2293	0	0.2176	AcOrf-146 peptide
BGPR01003736.1_ORF.154	NC_002816.1_NP_148855.1	6.466	5	0.1382	0	0.2409	ORF71 P24capsid
BGPR01003736.1_ORF.154	NC_001623.1_NP_054067.1	4.501	5	0.1993	0	0.1276	AcOrf-38 peptide
BGPR01003736.1_ORF.154	NC_002816.1_NP_148841.1	4.238	5	0.09721	0	0.245	ORF57 39K
BGPR01003736.1_ORF.154	NC_005906.1_YP_025203.1	7.295	5	0.2364	0	0.1461	hypothetical protein
BGPR01003736.1_ORF.154	NC_001623.1_NP_054172.1	7.748	5	0.1702	0	0.263	hypothetical protein
BGPR01003736.1_ORF.154	NC_001623.1_NP_054094.1	7.295	5	0.1579	0	0.2265	fusolin; spindle body protein
BGPR01003736.1_ORF.154	NC_002816.1_NP_148927.1	7.748	5	0.2724	0	0.1614	ORF143 ME53
BGPR01003736.1_ORF.154	NC_005906.1_YP_025289.1	7.748	5	0.1379	0	0.2323	major viral capsid protein
BGPR01003736.1_ORF.154	NC_001623.1_NP_054050.1	7.295	5	0.1475	0	0.2194	actin rearrangement inducing factor
BGPR01003736.1_ORF.154	NC_002816.1_NP_148795.1	6.868	5	0.1195	0	0.2441	ORF11 cathepsin
BGPR01003736.1_ORF.154	NC_002816.1_NP_148872.1	7.295	5	0.1531	0	0.1942	ORF88 similar to AcMNPV ORF98
BGPR01003736.1_ORF.154	NC_002816.1_NP_148924.1	5.731	5	0.1344	0	0.2182	ORF140 similar to XcGV ORF178
BGPR01003736.1_ORF.154	NC_003084.1_NP_203386.1	6.087	5	0.1309	0	0.2506	CUN082 hypothetical protein
BGPR01003736.1_ORF.154	NC_002816.1_NP_148883.1	9.283	5	0.2747	0	0.158	ORF99 similar to XcGV ORF113
BGPR01003736.1_ORF.154	NC_001623.1_NP_054182.1	3.536	5	0.06947	0	0.2204	early gene transactivator
BGPR01003736.1_ORF.154	NC_003084.1_NP_203399.1	8.229	5	0.1547	0	0.2721	CUN095 putative bro protein, similar to AcMNPV ORF2
BGPR01003736.1_ORF.154	NC_002816.1_NP_148799.1	5.079	5	0.1086	0	0.1884	ORF15 P49
BGPR01003736.1_ORF.154	NC_002816.1_NP_148910.1	7.295	5	0.2906	0	0.1463	ORF126 HELICASE-2
BGPR01003736.1_ORF.154	NC_001973.1_NP_047686.1	7.748	5	0.2519	0	0.1376	Ld-helicase-2
BGPR01003736.1_ORF.154	NC_001623.1_NP_054120.1	4.781	5	0.09979	0	0.1995	late expression factor 4
BGPR01003736.1_ORF.154	NC_001623.1_NP_054173.1	8.741	5	0.2462	0	0.1599	early 49 Daa protein
BGPR01003736.1_ORF.154	NC_001973.1_NP_047730.1	2.95	5	0.08351	0	0.1975	late expression factor 4
BGPR01003736.1_ORF.154	NC_003084.1_NP_203413.1	4.238	5	0.08192	0	0.2519	CUN109 putative bro protein, ATP_GTP_A motif, similar to AcMNPV ORF2
BGPR01003736.1_ORF.154	NC_001973.1_NP_047701.1	6.087	5	0.1215	0	0.2326	late expression factor 9
BGPR01003736.1_ORF.154	NC_005906.1_YP_025277.1	7.295	5	0.1369	0	0.2299	per os infectivity factor
BGPR01003736.1_ORF.154	NC_001623.1_NP_054038.1	7.748	5	0.1375	0	0.292	viral capsid associated protein
BGPR01003736.1_ORF.154	NC_003084.1_NP_203305.1	9.283	5	0.1862	0	0.267	CUN001 putative bro protein, ATP_GTP_A motif, similar to AcMNPV ORF 2
BGPR01003736.1_ORF.154	NC_001973.1_NP_047663.1	7.748	5	0.1673	0	0.2413	envelope protein p74
BGPR01003736.1_ORF.154	NC_005906.1_YP_025206.1	4.238	5	0.1085	0	0.1983	hypothetical protein
BGPR01003736.1_ORF.154	NC_002816.1_NP_148895.1	6.087	5	0.1252	0	0.2422	ORF111 DNAPOL
BGPR01003736.1_ORF.154	NC_001623.1_NP_054185.1	9.283	4	0.1827	0	0.1965	AcOrf-154 peptide
BGPR01003736.1_ORF.154	NC_001973.1_NP_047643.1	9.283	4	0.1386	0	0.2292	LdOrf-7 peptide
BGPR01003736.1_ORF.154	NC_002816.1_NP_148857.1	7.295	4	0.1167	0	0.2423	ORF73 38.7KD
BGPR01003736.1_ORF.154	NC_001623.1_NP_054111.1	9.859	4	0.1318	0	0.2518	AcOrf-81 peptide
BGPR01003736.1_ORF.154	NC_003084.1_NP_203372.1	9.859	4	0.1468	0	0.2006	CUN068 hypothetical protein
BGPR01003736.1_ORF.154	NC_001623.1_NP_054037.1	9.859	4	0.1489	0	0.2055	major occlusion body protein
BGPR01003736.1_ORF.154	NC_002816.1_NP_148785.1	9.859	4	0.1527	0	0.197	ORF1 granulin
BGPR01003736.1_ORF.154	NC_001973.1_NP_047670.1	9.859	4	0.1702	0	0.2374	LdOrf-34 peptide
BGPR01003736.1_ORF.154	NC_001973.1_NP_047705.1	8.229	4	0.228	0	0.1057	Ld-gp37
BGPR01003736.1_ORF.154	NC_001973.1_NP_047639.1	9.859	4	0.2066	0	0.155	protein kinase
BGPR01003736.1_ORF.154	NC_002816.1_NP_148922.1	6.466	4	0.115	0	0.1998	ORF138 VP1054
BGPR01003736.1_ORF.154	NC_001623.1_NP_054068.1	9.859	4	0.1273	0	0.221	hypothetical protein
BGPR01003736.1_ORF.154	NC_001623.1_NP_054092.1	8.229	4	0.1219	0	0.2159	late expression factor 9
BGPR01003736.1_ORF.154	NC_001973.1_NP_047707.1	8.741	4	0.1366	0	0.1779	chitinase
BGPR01003736.1_ORF.154	NC_002816.1_NP_148821.1	9.859	4	0.2638	0	0.1344	ORF37 ODV-E66
BGPR01003736.1_ORF.154	NC_003084.1_NP_203396.1	9.859	4	0.1368	0	0.2639	CUN091 putative dnapolymerase, similar to AcMNPV ORF65
BGPR01003736.1_ORF.154	NC_001973.1_NP_047734.1	8.741	4	0.1537	0	0.1854	helicase
BGPR01003736.1_ORF.154	NC_002816.1_NP_148875.1	9.859	3	0.1324	0	0.1619	ORF91 ODV-E25
BGPR01003736.1_ORF.154	NC_003084.1_NP_203400.1	9.859	3	0.09493	0	0.2193	CUN096 putative lef-4 transcription factor, similar to AcMNPV ORF90
BGPR01003736.1_ORF.154	NC_001623.1_NP_054156.1	7.748	3	0.09956	0	0.1665	chitinase
BGPR01005754.1_ORF.211	NC_001623.1_NP_054095.1	0.06957	30	0.2719	0.09	0.2985	DNA-dependant DNA-polymerase
BGPR01005754.1_ORF.211	NC_001973.1_NP_047720.1	0.2444	27	0.3437	0.069	0.2912	DNA polymerase
BGPR01005754.1_ORF.211	NC_001623.1_NP_054124.1	0.8587	26	0.4174	0.063	0.3994	occlusion-derived virus envelope protein
BGPR01005754.1_ORF.211	NC_005906.1_YP_025217.1	0.2043	23	0.2327	0.045	0.303	DNA polymerase
BGPR01005754.1_ORF.211	NC_002816.1_NP_148895.1	0.35	23	0.2904	0.045	0.2992	ORF111 DNAPOL
BGPR01005754.1_ORF.211	NC_003084.1_NP_203396.1	0.1924	23	0.2292	0.045	0.2908	CUN091 putative dnapolymerase, similar to AcMNPV ORF65
BGPR01005754.1_ORF.211	NC_001623.1_NP_054042.1	1.158	21	0.503	0.034	0.2513	AcOrf-13 peptide
BGPR01005754.1_ORF.211	NC_001973.1_NP_047733.1	1.562	20	0.4734	0.029	0.2986	Ld-odv-e25 peptide
BGPR01005754.1_ORF.211	NC_003084.1_NP_203343.1	1.658	20	0.3462	0.029	0.4321	CUN039 hypothetical protein
BGPR01005754.1_ORF.211	NC_002816.1_NP_148857.1	3.017	19	0.4067	0.024	0.4693	ORF73 38.7KD
BGPR01005754.1_ORF.211	NC_001973.1_NP_047718.1	0.2755	19	0.225	0.024	0.2509	late expression factor 3
BGPR01005754.1_ORF.211	NC_001973.1_NP_047670.1	0.5321	18	0.2106	0.02	0.3202	LdOrf-34 peptide
BGPR01005754.1_ORF.211	NC_001973.1_NP_047727.1	0.2925	16	0.16	0.014	0.2374	LdOrf-82 peptide
BGPR01005754.1_ORF.211	NC_002816.1_NP_148897.1	1.562	16	0.2701	0.014	0.3235	ORF113 LEF-3
BGPR01005754.1_ORF.211	NC_005906.1_YP_025239.1	0.8587	16	0.2382	0.014	0.2661	hypothetical protein
BGPR01005754.1_ORF.211	NC_005906.1_YP_025229.1	1.23	16	0.2424	0.014	0.3125	hypothetical protein
BGPR01005754.1_ORF.211	NC_001623.1_NP_054173.1	0.3105	15	0.1365	0.011	0.2523	early 49 Daa protein
BGPR01005754.1_ORF.211	NC_001973.1_NP_047764.1	3.017	14	0.5194	0.01	0.2178	LdOrf-127 peptide
BGPR01005754.1_ORF.211	NC_001623.1_NP_054047.1	0.2925	14	0.1269	0.01	0.2495	AcOrf-18 peptide
BGPR01005754.1_ORF.211	NC_001623.1_NP_054097.1	4.586	14	0.5308	0.01	0.2843	late expression factor 3
BGPR01005754.1_ORF.211	NC_001973.1_NP_047734.1	4.069	14	0.3835	0.01	0.3678	helicase
BGPR01005754.1_ORF.211	NC_001623.1_NP_054103.1	2.237	13	0.2372	0.009	0.2982	AcOrf-73 peptide
BGPR01005754.1_ORF.211	NC_003084.1_NP_203364.1	0.8587	13	0.1922	0.009	0.2128	CUN060 hypothetical protein
BGPR01005754.1_ORF.211	NC_001623.1_NP_054135.1	0.9117	13	0.1749	0.009	0.2669	hypothetical protein
BGPR01005754.1_ORF.211	NC_001973.1_NP_047795.1	0.5649	12	0.1261	0.008	0.2212	LdOrf-158 peptide
BGPR01005754.1_ORF.211	NC_002816.1_NP_148879.1	2.521	12	0.2825	0.008	0.2667	ORF95 LEF-4
BGPR01005754.1_ORF.211	NC_001623.1_NP_054117.1	5.487	11	0.4631	0.007	0.2337	p15
BGPR01005754.1_ORF.211	NC_003084.1_NP_203320.1	3.4	11	0.3814	0.007	0.2084	CUN016 hypothetical protein
BGPR01005754.1_ORF.211	NC_005906.1_YP_025251.1	3.4	11	0.2311	0.007	0.3333	hypothetical protein
BGPR01005754.1_ORF.211	NC_005906.1_YP_025211.1	5.169	11	0.4299	0.007	0.2546	DNA binding protein
BGPR01005754.1_ORF.211	NC_005906.1_YP_025273.1	5.487	11	0.5261	0.007	0.2251	hypothetical protein
BGPR01005754.1_ORF.211	NC_003084.1_NP_203344.1	2.237	10	0.1797	0	0.252	CUN040 hypothetical protein
BGPR01005754.1_ORF.211	NC_001623.1_NP_054112.1	2.842	10	0.2679	0	0.2231	telokin-like protein-20
BGPR01005754.1_ORF.211	NC_001973.1_NP_047759.1	4.069	10	0.2706	0	0.2772	LdOrf-122 peptide
BGPR01005754.1_ORF.211	NC_002816.1_NP_148886.1	5.487	10	0.4743	0	0.2035	ORF102 TLP20
BGPR01005754.1_ORF.211	NC_005906.1_YP_025232.1	3.017	10	0.2059	0	0.2975	hypothetical protein
BGPR01005754.1_ORF.211	NC_001973.1_NP_047651.1	1.658	10	0.1386	0	0.2564	immediate early transactivator 1
BGPR01005754.1_ORF.211	NC_005906.1_YP_025206.1	3.203	10	0.2067	0	0.2684	hypothetical protein
BGPR01005754.1_ORF.211	NC_005906.1_YP_025285.1	7.854	9	0.3777	0	0.3246	hypothetical protein
BGPR01005754.1_ORF.211	NC_002816.1_NP_148882.1	2.677	9	0.1606	0	0.2679	ORF98 PTP-2
BGPR01005754.1_ORF.211	NC_001623.1_NP_054070.1	5.169	9	0.239	0	0.3012	AcOrf-41 peptide
BGPR01005754.1_ORF.211	NC_001623.1_NP_054162.1	3.017	9	0.3568	0	0.1412	AcOrf-132 peptide
BGPR01005754.1_ORF.211	NC_001623.1_NP_054166.1	7.854	9	0.4996	0	0.2158	hypothetical protein
BGPR01005754.1_ORF.211	NC_002816.1_NP_148878.1	2.375	9	0.1317	0	0.2803	ORF94 IAP
BGPR01005754.1_ORF.211	NC_001973.1_NP_047676.1	7.854	9	0.4884	0	0.2116	Ld-p26 peptide
BGPR01005754.1_ORF.211	NC_002816.1_NP_148817.1	5.487	9	0.2681	0	0.3126	ORF33 similar to XcGV ORF29
BGPR01005754.1_ORF.211	NC_003084.1_NP_203357.1	2.375	9	0.143	0	0.252	CUN054 putative alk-exo DNA processing exonuclease, similar to AcMNPV ORF133
BGPR01005754.1_ORF.211	NC_002816.1_NP_148907.1	3.203	9	0.2658	0	0.1816	ORF123 FGF
BGPR01005754.1_ORF.211	NC_001623.1_NP_054125.1	1.23	9	0.1374	0	0.2028	helicase
BGPR01005754.1_ORF.211	NC_001973.1_NP_047692.1	8.338	8	0.3463	0	0.2755	late expression factor 10
BGPR01005754.1_ORF.211	NC_003084.1_NP_203313.1	3.4	8	0.2799	0	0.1384	CUN009 hypothetical protein
BGPR01005754.1_ORF.211	NC_002816.1_NP_148894.1	6.565	8	0.2653	0	0.2589	ORF110
BGPR01005754.1_ORF.211	NC_003084.1_NP_203336.1	5.825	8	0.2332	0	0.274	CUN032 putative odv-ec27 oclusion derived envelope protein, similar to AcMNPV ORF144
BGPR01005754.1_ORF.211	NC_002816.1_NP_148881.1	2.677	8	0.1527	0	0.2238	ORF97 ODV-EC27
BGPR01005754.1_ORF.211	NC_002816.1_NP_148922.1	5.487	8	0.2676	0	0.223	ORF138 VP1054
BGPR01005754.1_ORF.211	NC_001623.1_NP_054178.1	6.184	8	0.252	0	0.3031	early gene transactivator
BGPR01005754.1_ORF.211	NC_003084.1_NP_203412.1	8.338	8	0.388	0	0.2296	CUN108 putative bro protein, ATP_GTP_A motif, similar to AcMNPV ORF2
BGPR01005754.1_ORF.211	NC_003084.1_NP_203398.1	9.972	7	0.3382	0	0.3254	CUN094 hypothetical protein
BGPR01005754.1_ORF.211	NC_005906.1_YP_025272.1	8.338	7	0.3794	0	0.182	hypothetical protein
BGPR01005754.1_ORF.211	NC_001973.1_NP_047672.1	3.833	7	0.2418	0	0.1592	LdOrf-36 peptide
BGPR01005754.1_ORF.211	NC_003084.1_NP_203387.1	8.851	7	0.3542	0	0.2543	CUN084 hypothetical protein
BGPR01005754.1_ORF.211	NC_002816.1_NP_148842.1	7.854	7	0.2054	0	0.3196	ORF58 LEF-11
BGPR01005754.1_ORF.211	NC_002816.1_NP_148887.1	1.23	7	0.1292	0	0.1172	ORF103 similar to AcMNPV ORF81
BGPR01005754.1_ORF.211	NC_003084.1_NP_203346.1	8.338	7	0.4425	0	0.1707	CUN041 hypothetical protein
BGPR01005754.1_ORF.211	NC_002816.1_NP_148875.1	5.825	7	0.2071	0	0.2759	ORF91 ODV-E25
BGPR01005754.1_ORF.211	NC_001973.1_NP_047673.1	3.833	7	0.1912	0	0.2027	LdOrf-37 peptide
BGPR01005754.1_ORF.211	NC_003084.1_NP_203372.1	5.487	7	0.2827	0	0.1732	CUN068 hypothetical protein
BGPR01005754.1_ORF.211	NC_005906.1_YP_025203.1	7.854	7	0.1927	0	0.4041	hypothetical protein
BGPR01005754.1_ORF.211	NC_005906.1_YP_025256.1	5.487	7	0.198	0	0.2192	hypothetical protein
BGPR01005754.1_ORF.211	NC_001623.1_NP_054128.1	7.854	7	0.2791	0	0.2302	hypothetical protein
BGPR01005754.1_ORF.211	NC_002816.1_NP_148924.1	4.069	7	0.2638	0	0.1498	ORF140 similar to XcGV ORF178
BGPR01005754.1_ORF.211	NC_001973.1_NP_047664.1	3.4	7	0.148	0	0.2373	LdOrf-28 peptide
BGPR01005754.1_ORF.211	NC_002816.1_NP_148909.1	3.833	7	0.1371	0	0.2407	ORF125 ALK-EXO
BGPR01005754.1_ORF.211	NC_003084.1_NP_203361.1	3.833	7	0.1445	0	0.2404	CUN057 hypothetical protein
BGPR01005754.1_ORF.211	NC_001973.1_NP_047686.1	2.375	7	0.1261	0	0.2055	Ld-helicase-2
BGPR01005754.1_ORF.211	NC_001973.1_NP_047762.1	5.825	7	0.1959	0	0.2444	ecdysteroid UDP-glucosyltransferase
BGPR01005754.1_ORF.211	NC_001623.1_NP_054134.1	9.395	7	0.2608	0	0.325	viral capsid associated protein
BGPR01005754.1_ORF.211	NC_001973.1_NP_047728.1	9.395	7	0.4775	0	0.1998	capsid associated protein
BGPR01005754.1_ORF.211	NC_002816.1_NP_148874.1	3.203	7	0.1377	0	0.2177	ORF90 HELICASE
BGPR01005754.1_ORF.211	NC_001623.1_NP_054151.1	9.395	6	0.3213	0	0.226	AcOrf-121 peptide
BGPR01005754.1_ORF.211	NC_003084.1_NP_203314.1	8.851	6	0.3697	0	0.1771	CUN010 hypothetical protein
BGPR01005754.1_ORF.211	NC_001973.1_NP_047698.1	4.869	6	0.1806	0	0.1951	LdOrf-62 peptide
BGPR01005754.1_ORF.211	NC_001623.1_NP_054055.1	6.184	6	0.2406	0	0.1849	AcOrf-26 peptide
BGPR01005754.1_ORF.211	NC_001973.1_NP_047643.1	6.565	6	0.2948	0	0.1537	LdOrf-7 peptide
BGPR01005754.1_ORF.211	NC_001623.1_NP_054111.1	2.521	6	0.1196	0	0.1842	AcOrf-81 peptide
BGPR01005754.1_ORF.211	NC_003084.1_NP_203376.1	4.869	6	0.1203	0	0.2501	CUN072 hypothetical protein
BGPR01005754.1_ORF.211	NC_001623.1_NP_054094.1	2.842	6	0.1107	0	0.2049	fusolin; spindle body protein
BGPR01005754.1_ORF.211	NC_005906.1_YP_025284.1	9.395	6	0.2817	0	0.2734	viral capsid associated protein
BGPR01005754.1_ORF.211	NC_003084.1_NP_203322.1	7.399	6	0.2369	0	0.1885	CUN018 putative vlf-1 very late expression factor 1, similar to AcMNPV ORF77
BGPR01005754.1_ORF.211	NC_001623.1_NP_054144.1	3.833	6	0.1094	0	0.2289	AcOrf-114 peptide
BGPR01005754.1_ORF.211	NC_002816.1_NP_148925.1	4.32	6	0.118	0	0.2296	ORF141 EGT
BGPR01005754.1_ORF.211	NC_003084.1_NP_203413.1	9.972	6	0.3625	0	0.2226	CUN109 putative bro protein, ATP_GTP_A motif, similar to AcMNPV ORF2
BGPR01005754.1_ORF.211	NC_002816.1_NP_148794.1	7.854	6	0.2497	0	0.2114	ORF10 chitinase
BGPR01005754.1_ORF.211	NC_001973.1_NP_047766.1	4.069	6	0.1136	0	0.2307	LdOrf-129 peptide
BGPR01005754.1_ORF.211	NC_003084.1_NP_203351.1	5.169	5	0.2449	0	0.1142	CUN047 hypothetical protein
BGPR01005754.1_ORF.211	NC_001973.1_NP_047666.1	8.851	5	0.1901	0	0.2711	LdOrf-30 peptide
BGPR01005754.1_ORF.211	NC_001623.1_NP_054073.1	8.851	5	0.1626	0	0.2408	AcOrf-44 peptide
BGPR01005754.1_ORF.211	NC_001973.1_NP_047754.1	9.395	5	0.1965	0	0.2186	LdOrf-117 peptide
BGPR01005754.1_ORF.211	NC_001623.1_NP_054046.1	6.97	5	0.2482	0	0.1316	AcOrf-17 peptide
BGPR01005754.1_ORF.211	NC_001973.1_NP_047747.1	9.972	5	0.182	0	0.2884	LdOrf-110 peptide
BGPR01005754.1_ORF.211	NC_001973.1_NP_047697.1	7.854	5	0.1932	0	0.2205	LdOrf-61 peptide
BGPR01005754.1_ORF.211	NC_002816.1_NP_148787.1	7.854	5	0.1574	0	0.2398	ORF3 PK-1
BGPR01005754.1_ORF.211	NC_003084.1_NP_203312.1	5.487	5	0.1529	0	0.2027	CUN008 putative vp1054 virion associated assembly protein, similar to AcMNPV ORF54
BGPR01005754.1_ORF.211	NC_001973.1_NP_047650.1	8.851	5	0.1583	0	0.2636	envelope protein
BGPR01005754.1_ORF.211	NC_001623.1_NP_054107.1	8.851	5	0.1769	0	0.2969	very late expression factor 1
BGPR01005754.1_ORF.211	NC_005906.1_YP_025246.1	6.565	5	0.1552	0	0.2368	hypothetical protein
BGPR01005754.1_ORF.211	NC_001623.1_NP_054120.1	5.825	5	0.174	0	0.1617	late expression factor 4
BGPR01005754.1_ORF.211	NC_005906.1_YP_025288.1	9.395	5	0.1711	0	0.3175	hypothetical protein
BGPR01005754.1_ORF.211	NC_001973.1_NP_047707.1	9.972	5	0.2412	0	0.2013	chitinase
BGPR01005754.1_ORF.211	NC_002816.1_NP_148904.1	8.851	5	0.1868	0	0.2065	ORF120 DNALIGASE
BGPR01005754.1_ORF.211	NC_003084.1_NP_203309.1	6.184	5	0.1107	0	0.2491	CUN005 putative bro protein, similar to AcMNPV ORF2
BGPR01005754.1_ORF.211	NC_001623.1_NP_054052.1	9.395	5	0.1685	0	0.2435	copia-like envelope protein
BGPR01005754.1_ORF.211	NC_001623.1_NP_054116.1	5.825	5	0.1349	0	0.2274	polynucleotide kinase/ligase
BGPR01005754.1_ORF.211	NC_001623.1_NP_054164.1	8.338	5	0.1504	0	0.2752	hypothetical protein
BGPR01005754.1_ORF.211	NC_003084.1_NP_203395.1	7.399	5	0.1755	0	0.2433	CUN092 hypothetical protein
BGPR01005754.1_ORF.211	NC_001623.1_NP_054083.1	7.854	4	0.194	0	0.137	late expression factor 10
BGPR01005754.1_ORF.211	NC_002816.1_NP_148921.1	8.851	4	0.22	0	0.1538	ORF137 LEF-10
BGPR01005754.1_ORF.211	NC_003084.1_NP_203380.1	8.851	4	0.1974	0	0.1372	CUN076 hypothetical protein
BGPR01005754.1_ORF.211	NC_005906.1_YP_025271.1	9.395	4	0.2359	0	0.12	hypothetical protein
BGPR01005754.1_ORF.211	NC_002816.1_NP_148873.1	8.851	4	0.1475	0	0.2284	ORF89 similar to AcMNPV ORF96
BGPR01005754.1_ORF.211	NC_002816.1_NP_148814.1	7.854	4	0.1369	0	0.2222	ORF30 similar to XcGV ORF26
BGPR01005754.1_ORF.211	NC_002816.1_NP_148828.1	7.854	4	0.1151	0	0.2448	ORF44
BGPR01005754.1_ORF.211	NC_001973.1_NP_047726.1	4.32	4	0.1149	0	0.1051	LdOrf-81 peptide
BGPR01005754.1_ORF.211	NC_001973.1_NP_047790.1	6.97	4	0.1205	0	0.2157	Ld-bro-n
BGPR01005754.1_ORF.211	NC_003084.1_NP_203377.1	8.338	4	0.1094	0	0.2481	CUN073 putative p47 transcription regulator factor, similar to AcMNPV ORF40
BGPR01005754.1_ORF.211	NC_003084.1_NP_203339.1	8.851	4	0.1378	0	0.1899	CUN035 putative p91 capsid virion protein, similar to AcMNPV ORF83
BGPR01005754.1_ORF.211	NC_002816.1_NP_148915.1	5.169	4	0.09783	0	0.2085	ORF131 LEF-8
BGPR01005754.1_ORF.211	NC_001973.1_NP_047742.1	9.972	3	0.1039	0	0.2225	Ld-vp80
BGPR01005754.1_ORF.211	NC_001623.1_NP_054054.1	9.972	2	0.08541	0	0.1202	ssDNA binding protein
BGPR01005754.1_ORF.57	NC_001623.1_NP_054076.1	7.684	10	0.3717	0	0.5384	AcOrf-47 peptide
BGPR01005754.1_ORF.57	NC_002816.1_NP_148799.1	8.894	10	0.4838	0	0.5021	ORF15 P49
BGPR01005754.1_ORF.57	NC_001623.1_NP_054084.1	7.684	9	0.3202	0	0.5565	viral capsid associated protein
BGPR01005754.1_ORF.57	NC_001623.1_NP_054080.1	9.569	8	0.3554	0	0.5368	AcOrf-51 peptide
BGPR01005754.1_ORF.57	NC_001623.1_NP_054175.1	5.328	7	0.1776	0	0.3752	occlusion-derived virus envelope/capsid protein
BGPR01005754.1_ORF.57	NC_002816.1_NP_148811.1	7.684	7	0.2949	0	0.3741	ORF27
BGPR01005754.1_ORF.57	NC_001973.1_NP_047729.1	7.684	6	0.1946	0	0.3844	capsid protein
BGPR01005754.1_ORF.57	NC_001623.1_NP_054072.1	9.569	5	0.2297	0	0.282	AcOrf-43 peptide
BGPR01036730.1_ORF.3	NC_002816.1_NP_148816.1	7.012	17	0.6951	0.016	0.6729	ORF32
BGPR01036730.1_ORF.3	NC_002816.1_NP_148917.1	5.712	15	0.5117	0.011	0.5865	ORF133 similar to XcGV ORF170
BGPR01036730.1_ORF.3	NC_003084.1_NP_203381.1	4.653	13	0.3373	0.009	0.4988	CUN077 hypothetical protein
BGPR01036730.1_ORF.3	NC_001623.1_NP_054148.1	9.212	12	0.5068	0.008	0.6393	AcOrf-118 peptide
BGPR01036730.1_ORF.3	NC_002816.1_NP_148844.1	8.605	12	0.4966	0.008	0.6186	ORF60 P74
BGPR01036730.1_ORF.3	NC_005906.1_YP_025250.1	8.037	10	0.4203	0	0.47	hypothetical protein
BGPR01036730.1_ORF.3	NC_001623.1_NP_054158.1	8.605	10	0.4968	0	0.4139	major budded virus envelope glycoprotein
BGPR01036730.1_ORF.3	NC_001973.1_NP_047663.1	8.605	9	0.3228	0	0.4819	envelope protein p74
BGPR01052641.1_ORF.23	NC_005906.1_YP_025217.1	1.719	24	0.5592	0.051	0.3692	DNA polymerase
BGPR01052641.1_ORF.23	NC_002816.1_NP_148887.1	0.7387	22	0.3515	0.04	0.332	ORF103 similar to AcMNPV ORF81
BGPR01052641.1_ORF.23	NC_005906.1_YP_025245.1	0.8853	20	0.316	0.029	0.337	hypothetical protein
BGPR01052641.1_ORF.23	NC_002816.1_NP_148895.1	2.784	20	0.5697	0.029	0.351	ORF111 DNAPOL
BGPR01052641.1_ORF.23	NC_003084.1_NP_203310.1	0.3373	19	0.2259	0.024	0.2576	CUN007 hypothetical protein
BGPR01052641.1_ORF.23	NC_001973.1_NP_047718.1	2.784	19	0.4933	0.024	0.3653	late expression factor 3
BGPR01052641.1_ORF.23	NC_001973.1_NP_047759.1	0.6955	18	0.2779	0.02	0.2781	LdOrf-122 peptide
BGPR01052641.1_ORF.23	NC_003084.1_NP_203339.1	1.35	18	0.309	0.02	0.3583	CUN035 putative p91 capsid virion protein, similar to AcMNPV ORF83
BGPR01052641.1_ORF.23	NC_001623.1_NP_054040.1	4.247	17	0.5538	0.016	0.3806	AcOrf-11 peptide
BGPR01052641.1_ORF.23	NC_002816.1_NP_148885.1	1.523	17	0.294	0.016	0.3318	ORF101 VP91 capsid
BGPR01052641.1_ORF.23	NC_001973.1_NP_047658.1	1.939	16	0.416	0.014	0.2661	DNA ligase
BGPR01052641.1_ORF.23	NC_003084.1_NP_203313.1	1.35	15	0.2813	0.011	0.2611	CUN009 hypothetical protein
BGPR01052641.1_ORF.23	NC_002816.1_NP_148873.1	1.061	15	0.2102	0.011	0.2927	ORF89 similar to AcMNPV ORF96
BGPR01052641.1_ORF.23	NC_001973.1_NP_047735.1	0.9988	15	0.2179	0.011	0.2847	LdOrf-98 peptide
BGPR01052641.1_ORF.23	NC_003084.1_NP_203376.1	3.544	15	0.4265	0.011	0.351	CUN072 hypothetical protein
BGPR01052641.1_ORF.23	NC_001623.1_NP_054117.1	1.35	14	0.256	0.01	0.2647	p15
BGPR01052641.1_ORF.23	NC_001973.1_NP_047720.1	2.621	14	0.357	0.01	0.2962	DNA polymerase
BGPR01052641.1_ORF.23	NC_001623.1_NP_054126.1	1.939	12	0.2029	0.008	0.2821	AcOrf-96 peptide
BGPR01052641.1_ORF.23	NC_002816.1_NP_148924.1	5.741	12	0.3792	0.008	0.3559	ORF140 similar to XcGV ORF178
BGPR01052641.1_ORF.23	NC_005906.1_YP_025209.1	5.405	11	0.4288	0.007	0.2842	hypothetical protein
BGPR01052641.1_ORF.23	NC_001973.1_NP_047788.1	1.826	11	0.2182	0.007	0.2361	LdOrf-151 peptide
BGPR01052641.1_ORF.23	NC_002816.1_NP_148904.1	3.764	11	0.3051	0.007	0.2838	ORF120 DNALIGASE
BGPR01052641.1_ORF.23	NC_001973.1_NP_047672.1	3.544	10	0.2444	0	0.2706	LdOrf-36 peptide
BGPR01052641.1_ORF.23	NC_001623.1_NP_054155.1	8.751	10	0.8025	0	0.2018	late expression factor 7
BGPR01052641.1_ORF.23	NC_001973.1_NP_047793.1	3.337	10	0.2279	0	0.2671	fibroblast growth factor
BGPR01052641.1_ORF.23	NC_001623.1_NP_054165.1	1.618	10	0.1662	0	0.2408	annihilator
BGPR01052641.1_ORF.23	NC_001623.1_NP_054135.1	4.247	10	0.3261	0	0.2353	hypothetical protein
BGPR01052641.1_ORF.23	NC_003084.1_NP_203314.1	5.741	9	0.329	0	0.2765	CUN010 hypothetical protein
BGPR01052641.1_ORF.23	NC_001623.1_NP_054083.1	7.759	9	0.3771	0	0.3006	late expression factor 10
BGPR01052641.1_ORF.23	NC_005906.1_YP_025226.1	4.791	9	0.2379	0	0.2717	hypothetical protein
BGPR01052641.1_ORF.23	NC_002816.1_NP_148857.1	3.764	9	0.2429	0	0.254	ORF73 38.7KD
BGPR01052641.1_ORF.23	NC_003084.1_NP_203404.1	3.764	9	0.2091	0	0.2451	CUN100 hypothetical protein
BGPR01052641.1_ORF.23	NC_001973.1_NP_047676.1	3.141	9	0.2168	0	0.229	Ld-p26 peptide
BGPR01052641.1_ORF.23	NC_001623.1_NP_054104.1	5.741	9	0.2659	0	0.2874	AcOrf-74 peptide
BGPR01052641.1_ORF.23	NC_003084.1_NP_203332.1	7.305	9	0.3497	0	0.3141	CUN028 hypothetical protein
BGPR01052641.1_ORF.23	NC_002816.1_NP_148808.1	3.998	9	0.2123	0	0.293	ORF24 PE-38
BGPR01052641.1_ORF.23	NC_003084.1_NP_203333.1	3.337	9	0.2248	0	0.2333	CUN029 similar to AcMNPV ORF119
BGPR01052641.1_ORF.23	NC_003084.1_NP_203396.1	3.141	9	0.2715	0	0.1988	CUN091 putative dnapolymerase, similar to AcMNPV ORF65
BGPR01052641.1_ORF.23	NC_005906.1_YP_025204.1	5.405	8	0.2288	0	0.2496	hypothetical protein
BGPR01052641.1_ORF.23	NC_001623.1_NP_054118.1	5.089	8	0.252	0	0.2442	hypothetical protein
BGPR01052641.1_ORF.23	NC_001973.1_NP_047659.1	1.719	8	0.1385	0	0.1961	LdOrf-23 peptide
BGPR01052641.1_ORF.23	NC_002816.1_NP_148897.1	7.305	8	0.304	0	0.303	ORF113 LEF-3
BGPR01052641.1_ORF.23	NC_001623.1_NP_054097.1	4.791	8	0.2239	0	0.2746	late expression factor 3
BGPR01052641.1_ORF.23	NC_003084.1_NP_203377.1	8.751	8	0.3094	0	0.3634	CUN073 putative p47 transcription regulator factor, similar to AcMNPV ORF40
BGPR01052641.1_ORF.23	NC_005906.1_YP_025259.1	3.337	8	0.1955	0	0.2015	late expression factor-4
BGPR01052641.1_ORF.23	NC_003084.1_NP_203400.1	7.305	8	0.314	0	0.2788	CUN096 putative lef-4 transcription factor, similar to AcMNPV ORF90
BGPR01052641.1_ORF.23	NC_005906.1_YP_025283.1	5.405	8	0.2449	0	0.2827	viral capsid associated protein
BGPR01052641.1_ORF.23	NC_001973.1_NP_047692.1	6.097	7	0.2192	0	0.2409	late expression factor 10
BGPR01052641.1_ORF.23	NC_003084.1_NP_203344.1	9.869	7	0.2906	0	0.3189	CUN040 hypothetical protein
BGPR01052641.1_ORF.23	NC_001623.1_NP_054055.1	6.097	7	0.2427	0	0.2352	AcOrf-26 peptide
BGPR01052641.1_ORF.23	NC_005906.1_YP_025257.1	5.741	7	0.1843	0	0.2691	hypothetical protein
BGPR01052641.1_ORF.23	NC_001623.1_NP_054070.1	7.759	7	0.3017	0	0.2694	AcOrf-41 peptide
BGPR01052641.1_ORF.23	NC_003084.1_NP_203393.1	7.305	7	0.2209	0	0.298	CUN090 putative similar to AcMNPV ORF96
BGPR01052641.1_ORF.23	NC_001623.1_NP_054031.1	8.24	7	0.3019	0	0.277	baculovirus repeated ORF
BGPR01052641.1_ORF.23	NC_001623.1_NP_054047.1	5.405	7	0.2458	0	0.2171	AcOrf-18 peptide
BGPR01052641.1_ORF.23	NC_001973.1_NP_047792.1	8.751	7	0.3157	0	0.2413	LdOrf-155 peptide
BGPR01052641.1_ORF.23	NC_001623.1_NP_054116.1	7.305	7	0.2392	0	0.2712	polynucleotide kinase/ligase
BGPR01052641.1_ORF.23	NC_001623.1_NP_054113.1	6.097	7	0.2275	0	0.2621	viral capsid associated protein
BGPR01052641.1_ORF.23	NC_001623.1_NP_054090.1	8.24	6	0.2189	0	0.2424	AcOrf-60 peptide
BGPR01052641.1_ORF.23	NC_002816.1_NP_148921.1	4.247	6	0.1399	0	0.2019	ORF137 LEF-10
BGPR01052641.1_ORF.23	NC_003084.1_NP_203359.1	6.097	6	0.2374	0	0.197	CUN056 hypothetical protein
BGPR01052641.1_ORF.23	NC_005906.1_YP_025215.1	9.294	6	0.2683	0	0.2543	hypothetical protein
BGPR01052641.1_ORF.23	NC_002816.1_NP_148813.1	9.294	6	0.2444	0	0.2633	ORF29 similar to XcGV ORF25
BGPR01052641.1_ORF.23	NC_001623.1_NP_054184.1	7.305	6	0.2656	0	0.2187	hypothetical protein
BGPR01052641.1_ORF.23	NC_001973.1_NP_047669.1	9.869	6	0.299	0	0.2785	Ld-bro-b
BGPR01052641.1_ORF.23	NC_001623.1_NP_054042.1	8.751	6	0.2799	0	0.2513	AcOrf-13 peptide
BGPR01052641.1_ORF.23	NC_003084.1_NP_203312.1	8.24	6	0.2334	0	0.2821	CUN008 putative vp1054 virion associated assembly protein, similar to AcMNPV ORF54
BGPR01052641.1_ORF.23	NC_001973.1_NP_047795.1	3.337	6	0.1431	0	0.1778	LdOrf-158 peptide
BGPR01052641.1_ORF.23	NC_001623.1_NP_054052.1	9.869	6	0.246	0	0.2805	copia-like envelope protein
BGPR01052641.1_ORF.23	NC_005906.1_YP_025258.1	9.869	6	0.2765	0	0.2599	helicase
BGPR01052641.1_ORF.23	NC_001973.1_NP_047734.1	6.878	6	0.1768	0	0.2612	helicase
BGPR01052641.1_ORF.23	NC_002816.1_NP_148827.1	9.294	5	0.2986	0	0.1794	ORF43
BGPR01052641.1_ORF.23	NC_002816.1_NP_148814.1	5.741	5	0.1227	0	0.2059	ORF30 similar to XcGV ORF26
BGPR01052641.1_ORF.23	NC_001623.1_NP_054041.1	9.869	5	0.1854	0	0.2728	AcOrf-12 peptide
BGPR01052641.1_ORF.23	NC_002816.1_NP_148785.1	7.759	5	0.1731	0	0.2457	ORF1 granulin
BGPR01052641.1_ORF.23	NC_001973.1_NP_047789.1	6.476	5	0.1319	0	0.2287	LdOrf-152 peptide
BGPR01052641.1_ORF.23	NC_005906.1_YP_025260.1	6.097	5	0.2342	0	0.1417	hypothetical protein
BGPR01052641.1_ORF.23	NC_002816.1_NP_148915.1	6.097	5	0.1602	0	0.1644	ORF131 LEF-8
BGPR01052641.1_ORF.23	NC_002816.1_NP_148792.1	9.294	4	0.1722	0	0.1879	ORF8 similar to AcMNPV ORF146
BGPR01052641.1_ORF.23	NC_001623.1_NP_054177.1	9.869	4	0.1817	0	0.202	AcOrf-146 peptide
BGPR01052641.1_ORF.23	NC_005906.1_YP_025203.1	9.869	4	0.1564	0	0.2011	hypothetical protein
BGPR01052641.1_ORF.23	NC_002816.1_NP_148820.1	9.869	3	0.1349	0	0.1562	ORF36
BGPR01052641.1_ORF.23	NC_001973.1_NP_047637.1	9.869	3	0.1319	0	0.1706	polyhedrin
BGPR01003736.1_ORF.138	NC_003084.1_NP_203355.1	4.539	14	0.3357	0.01	0.3576	CUN052 hypothetical protein
BGPR01003736.1_ORF.138	NC_001973.1_NP_047796.1	5.953	13	0.3414	0.009	0.3989	LdOrf-159 peptide
BGPR01003736.1_ORF.138	NC_001973.1_NP_047704.1	5.953	13	0.4077	0.009	0.3512	host range factor 1
BGPR01003736.1_ORF.138	NC_001973.1_NP_047638.1	2.785	13	0.1899	0.009	0.3824	essential structural protein pp78-81
BGPR01003736.1_ORF.138	NC_003084.1_NP_203326.1	3.46	12	0.1997	0.008	0.3769	CUN022 hypothetical protein
BGPR01003736.1_ORF.138	NC_001973.1_NP_047649.1	7.394	11	0.3391	0.007	0.357	LdOrf-13 peptide
BGPR01003736.1_ORF.138	NC_005906.1_YP_025206.1	6.635	11	0.2878	0.007	0.3987	hypothetical protein
BGPR01003736.1_ORF.138	NC_001623.1_NP_054093.1	4.299	10	0.2057	0	0.308	AcOrf-63 peptide
BGPR01003736.1_ORF.138	NC_003084.1_NP_203337.1	6.284	9	0.203	0	0.3551	CUN033 putative gp41 tegument protein, similar to AcMNPV ORF80
BGPR01003736.1_ORF.138	NC_001623.1_NP_054172.1	7.806	8	0.2038	0	0.3482	hypothetical protein
BGPR01003736.1_ORF.138	NC_002816.1_NP_148888.1	5.341	8	0.153	0	0.3358	ORF104 GP41
BGPR01003736.1_ORF.138	NC_005906.1_YP_025226.1	6.635	7	0.1639	0	0.3255	hypothetical protein
BGPR01003736.1_ORF.138	NC_001623.1_NP_054154.1	6.284	7	0.148	0	0.3092	AcOrf-124 peptide
BGPR01001437.1_ORF.228	NC_001973.1_NP_047756.1	1.234e-18	468	0.5926	1	0.6785	LdOrf-119 peptide	PIF-2
BGPR01001437.1_ORF.228	NC_003084.1_NP_203342.1	3.266e-18	437	0.561	1	0.654	CUN038 similar to AcMNPV ORF22	PIF-2
BGPR01001437.1_ORF.228	NC_001623.1_NP_054051.1	3.921e-18	433	0.5517	1	0.6563	AcOrf-22 peptide	PIF-2
BGPR01001437.1_ORF.228	NC_002816.1_NP_148832.1	6.78e-18	425	0.5584	1	0.6427	ORF48 similar to AcMNPV ORF22	PIF-2
BGPR01001437.1_ORF.228	NC_005906.1_YP_025252.1	3.96e-17	425	0.5926	1	0.6572	per os infectivity factor-2	PIF-2
BGPR01001437.1_ORF.228	NC_005906.1_YP_025277.1	4.747e-05	75	0.2638	0.967	0.4284	per os infectivity factor	PIF-1
BGPR01001437.1_ORF.228	NC_003084.1_NP_203333.1	0.0003131	67	0.2731	0.9	0.4472	CUN029 similar to AcMNPV ORF119	PIF-1
BGPR01001437.1_ORF.228	NC_002816.1_NP_148859.1	0.0001113	67	0.2462	0.9	0.4217	ORF75 similar to AcMNPV ORF119	PIF-1
BGPR01001437.1_ORF.228	NC_001973.1_NP_047792.1	0.0003328	44	0.1458	0.301	0.3625	LdOrf-155 peptide
BGPR01001437.1_ORF.228	NC_001623.1_NP_054149.1	0.0005095	37	0.1228	0.164	0.3396	AcOrf-119 peptide
BGPR01001437.1_ORF.228	NC_005906.1_YP_025266.1	0.1555	26	0.1807	0.063	0.4447	hypothetical protein
BGPR01001437.1_ORF.228	NC_001623.1_NP_054145.1	0.253	26	0.2127	0.063	0.4784	AcOrf-115 peptide
BGPR01001437.1_ORF.228	NC_003084.1_NP_203350.1	0.3036	25	0.2219	0.057	0.4509	CUN046 similar to AcMNPV ORF115
BGPR01001437.1_ORF.228	NC_002816.1_NP_148819.1	0.4116	23	0.2083	0.045	0.4762	ORF35 similar to AcMNPV ORF115
BGPR01001437.1_ORF.228	NC_001973.1_NP_047780.1	0.4375	22	0.1916	0.04	0.4814	LdOrf-143 peptide
BGPR01001437.1_ORF.228	NC_005906.1_YP_025283.1	0.1219	19	0.1505	0.024	0.2705	viral capsid associated protein
BGPR01001437.1_ORF.228	NC_005906.1_YP_025231.1	2.716	16	0.3493	0.014	0.4029	unkown
BGPR01001437.1_ORF.228	NC_001623.1_NP_054083.1	3.681	15	0.3242	0.011	0.4792	late expression factor 10
BGPR01001437.1_ORF.228	NC_001623.1_NP_054181.1	4.418	14	0.3142	0.01	0.4957	AcOrf-150 peptide
BGPR01001437.1_ORF.228	NC_001623.1_NP_054121.1	5.303	14	0.3064	0.01	0.5796	AcOrf-91 peptide
BGPR01001437.1_ORF.228	NC_001973.1_NP_047684.1	3.464	14	0.3115	0.01	0.4058	Ld-p47
BGPR01001437.1_ORF.228	NC_003084.1_NP_203380.1	4.158	12	0.3851	0.008	0.2999	CUN076 hypothetical protein
BGPR01001437.1_ORF.228	NC_003084.1_NP_203367.1	2.129	12	0.1937	0.008	0.3418	CUN063 hypothetical protein
BGPR01001437.1_ORF.228	NC_002816.1_NP_148895.1	7.638	12	0.4586	0.008	0.4696	ORF111 DNAPOL
BGPR01001437.1_ORF.228	NC_001623.1_NP_054117.1	2.262	11	0.2614	0.007	0.234	p15
BGPR01001437.1_ORF.228	NC_001623.1_NP_054092.1	5.989	11	0.2944	0.007	0.4335	late expression factor 9
BGPR01001437.1_ORF.228	NC_002816.1_NP_148856.1	7.187	10	0.4331	0	0.306	ORF72
BGPR01001437.1_ORF.228	NC_003084.1_NP_203364.1	6.763	10	0.3183	0	0.396	CUN060 hypothetical protein
BGPR01001437.1_ORF.228	NC_001623.1_NP_054100.1	4.99	10	0.2306	0	0.415	AcOrf-70 peptide
BGPR01001437.1_ORF.228	NC_003084.1_NP_203407.1	7.638	10	0.3219	0	0.4324	CUN103 hypothetical protein
BGPR01001437.1_ORF.228	NC_002816.1_NP_148885.1	1.026	10	0.1431	0	0.2115	ORF101 VP91 capsid
BGPR01001437.1_ORF.228	NC_003084.1_NP_203331.1	6.364	9	0.2778	0	0.3349	CUN027 hypothetical protein
BGPR01001437.1_ORF.228	NC_003084.1_NP_203348.1	9.164	9	0.3326	0	0.3911	CUN044 hypothetical protein
BGPR01001437.1_ORF.228	NC_001623.1_NP_054069.1	8.624	9	0.2717	0	0.447	transcription regulator
BGPR01001437.1_ORF.228	NC_001623.1_NP_054072.1	4.158	8	0.237	0	0.233	AcOrf-43 peptide
BGPR01001437.1_ORF.228	NC_001623.1_NP_054033.1	8.116	8	0.2879	0	0.3328	AcOrf-4 peptide
BGPR01001437.1_ORF.228	NC_005906.1_YP_025210.1	7.638	8	0.1803	0	0.4914	hypothetical protein
BGPR01001437.1_ORF.228	NC_001973.1_NP_047637.1	3.912	8	0.1821	0	0.2631	polyhedrin
BGPR01001437.1_ORF.228	NC_005906.1_YP_025198.1	4.696	8	0.1956	0	0.2716	polyhedrin, major occlusion body protein
BGPR01001437.1_ORF.228	NC_001623.1_NP_054165.1	6.763	8	0.2612	0	0.3036	annihilator
BGPR01001437.1_ORF.228	NC_003084.1_NP_203312.1	9.737	8	0.3248	0	0.3867	CUN008 putative vp1054 virion associated assembly protein, similar to AcMNPV ORF54
BGPR01001437.1_ORF.228	NC_002816.1_NP_148821.1	3.067	8	0.1738	0	0.2176	ORF37 ODV-E66
BGPR01001437.1_ORF.228	NC_001973.1_NP_047720.1	6.364	8	0.2713	0	0.2489	DNA polymerase
BGPR01001437.1_ORF.228	NC_003084.1_NP_203351.1	3.067	7	0.1612	0	0.2069	CUN047 hypothetical protein
BGPR01001437.1_ORF.228	NC_002816.1_NP_148880.1	6.364	7	0.2585	0	0.2274	ORF96 VP39capsid
BGPR01001437.1_ORF.228	NC_001973.1_NP_047707.1	6.763	7	0.2599	0	0.2675	chitinase
BGPR01001437.1_ORF.228	NC_003084.1_NP_203339.1	2.886	7	0.1079	0	0.2419	CUN035 putative p91 capsid virion protein, similar to AcMNPV ORF83
BGPR01001437.1_ORF.228	NC_001623.1_NP_054113.1	2.404	7	0.1128	0	0.23	viral capsid associated protein
BGPR01001437.1_ORF.228	NC_005906.1_YP_025204.1	9.737	6	0.2384	0	0.2797	hypothetical protein
BGPR01001437.1_ORF.228	NC_001973.1_NP_047661.1	8.116	6	0.2324	0	0.279	LdOrf-25 peptide
BGPR01001437.1_ORF.228	NC_003084.1_NP_203359.1	7.187	6	0.1655	0	0.3328	CUN056 hypothetical protein
BGPR01001437.1_ORF.228	NC_002816.1_NP_148788.1	6.364	6	0.2258	0	0.1901	ORF4 similar to XcGV ORF7
BGPR01001437.1_ORF.228	NC_003084.1_NP_203372.1	4.418	6	0.1196	0	0.275	CUN068 hypothetical protein
BGPR01001437.1_ORF.228	NC_002816.1_NP_148785.1	5.303	6	0.152	0	0.2274	ORF1 granulin
BGPR01001437.1_ORF.228	NC_003084.1_NP_203404.1	9.164	6	0.2359	0	0.3296	CUN100 hypothetical protein
BGPR01001437.1_ORF.228	NC_002816.1_NP_148787.1	3.464	6	0.1226	0	0.2275	ORF3 PK-1
BGPR01001437.1_ORF.228	NC_002816.1_NP_148927.1	9.164	6	0.1822	0	0.3288	ORF143 ME53
BGPR01001437.1_ORF.228	NC_001973.1_NP_047800.1	5.989	6	0.2438	0	0.1854	LdOrf-163 peptide
BGPR01001437.1_ORF.228	NC_002816.1_NP_148922.1	9.164	6	0.2526	0	0.2971	ORF138 VP1054
BGPR01001437.1_ORF.228	NC_003084.1_NP_203386.1	3.259	6	0.1293	0	0.1938	CUN082 hypothetical protein
BGPR01001437.1_ORF.228	NC_003084.1_NP_203305.1	7.187	6	0.1882	0	0.2429	CUN001 putative bro protein, ATP_GTP_A motif, similar to AcMNPV ORF 2
BGPR01001437.1_ORF.228	NC_005906.1_YP_025217.1	3.681	6	0.1257	0	0.204	DNA polymerase
BGPR01001437.1_ORF.228	NC_003084.1_NP_203310.1	9.737	5	0.182	0	0.2587	CUN007 hypothetical protein
BGPR01001437.1_ORF.228	NC_001973.1_NP_047669.1	8.624	5	0.2359	0	0.2188	Ld-bro-b
BGPR01001437.1_ORF.228	NC_001623.1_NP_054156.1	9.164	5	0.1958	0	0.2559	chitinase
BGPR01001437.1_ORF.228	NC_001623.1_NP_054135.1	7.187	5	0.1963	0	0.2044	hypothetical protein
BGPR01001437.1_ORF.228	NC_001623.1_NP_054095.1	8.624	5	0.2051	0	0.257	DNA-dependant DNA-polymerase
BGPR01001437.1_ORF.228	NC_001623.1_NP_054067.1	6.364	4	0.0953	0	0.2236	AcOrf-38 peptide
BGPR01001437.1_ORF.228	NC_003084.1_NP_203343.1	7.187	4	0.16	0	0.1792	CUN039 hypothetical protein
BGPR01001437.1_ORF.228	NC_001623.1_NP_054168.1	9.164	4	0.1849	0	0.2143	occlusion-derived virus envelope protein
BGPR01001437.1_ORF.228	NC_001973.1_NP_047728.1	7.638	4	0.1167	0	0.2245	capsid associated protein
BGPR01001437.1_ORF.105	NC_005906.1_YP_025267.1	9.973	6	0.2282	0	0.5695	hypothetical protein
BGPR01001437.1_ORF.53	NC_001973.1_NP_047781.1	2.104	28	0.5693	0.076	0.5831	LdOrf-144 peptide
BGPR01001437.1_ORF.53	NC_005906.1_YP_025235.1	2.104	16	0.2135	0.014	0.4837	hypothetical protein
BGPR01001437.1_ORF.53	NC_001973.1_NP_047656.1	4.063	15	0.3327	0.011	0.5012	LdOrf-20 peptide
BGPR01001437.1_ORF.53	NC_003084.1_NP_203396.1	5.162	15	0.364	0.011	0.5163	CUN091 putative dnapolymerase, similar to AcMNPV ORF65
BGPR01001437.1_ORF.53	NC_001973.1_NP_047746.1	6.556	13	0.3972	0.009	0.4967	LdOrf-109 peptide
BGPR01001437.1_ORF.53	NC_002816.1_NP_148887.1	8.326	11	0.3745	0.007	0.4598	ORF103 similar to AcMNPV ORF81
BGPR01001437.1_ORF.53	NC_001623.1_NP_054144.1	5.817	11	0.3039	0.007	0.4255	AcOrf-114 peptide
BGPR01001437.1_ORF.53	NC_002816.1_NP_148902.1	9.381	8	0.3049	0	0.3361	ORF118 FP
BGPR01001437.1_ORF.53	NC_003084.1_NP_203378.1	9.957	8	0.2751	0	0.452	CUN074 putative p74 envelope protein, similar to AcMNPV ORF138
BGPR01001437.1_ORF.53	NC_005906.1_YP_025282.1	9.381	7	0.2515	0	0.3686	hypothetical protein
BGPR01005754.1_ORF.130	NC_001623.1_NP_054097.1	0.4268	40	0.4263	0.214	0.5963	late expression factor 3
BGPR01005754.1_ORF.130	NC_005906.1_YP_025283.1	0.36	38	0.4556	0.179	0.4717	viral capsid associated protein
BGPR01005754.1_ORF.130	NC_005906.1_YP_025226.1	0.5667	37	0.3927	0.164	0.6284	hypothetical protein
BGPR01005754.1_ORF.130	NC_003084.1_NP_203313.1	0.5998	30	0.4156	0.09	0.4039	CUN009 hypothetical protein
BGPR01005754.1_ORF.130	NC_003084.1_NP_203339.1	0.506	30	0.3637	0.09	0.4199	CUN035 putative p91 capsid virion protein, similar to AcMNPV ORF83
BGPR01005754.1_ORF.130	NC_001623.1_NP_054117.1	3.107	26	0.6588	0.063	0.5082	p15
BGPR01005754.1_ORF.130	NC_001623.1_NP_054083.1	2.089	23	0.3377	0.045	0.5663	late expression factor 10
BGPR01005754.1_ORF.130	NC_003084.1_NP_203387.1	2.34	23	0.3958	0.045	0.5148	CUN084 hypothetical protein
BGPR01005754.1_ORF.130	NC_001973.1_NP_047788.1	0.4268	23	0.199	0.045	0.432	LdOrf-151 peptide
BGPR01005754.1_ORF.130	NC_002816.1_NP_148885.1	0.7526	23	0.2687	0.045	0.4177	ORF101 VP91 capsid
BGPR01005754.1_ORF.130	NC_001623.1_NP_054113.1	0.5667	23	0.2491	0.045	0.3985	viral capsid associated protein
BGPR01005754.1_ORF.130	NC_001973.1_NP_047752.1	4.366	22	0.5357	0.04	0.5847	Ld-bro-k
BGPR01005754.1_ORF.130	NC_003084.1_NP_203404.1	2.621	21	0.3962	0.034	0.4898	CUN100 hypothetical protein
BGPR01005754.1_ORF.130	NC_001973.1_NP_047692.1	1.665	20	0.309	0.029	0.4038	late expression factor 10
BGPR01005754.1_ORF.130	NC_002816.1_NP_148897.1	3.48	20	0.3875	0.029	0.5563	ORF113 LEF-3
BGPR01005754.1_ORF.130	NC_005906.1_YP_025259.1	2.935	20	0.4407	0.029	0.4514	late expression factor-4
BGPR01005754.1_ORF.130	NC_001623.1_NP_054151.1	3.683	19	0.4536	0.024	0.4307	AcOrf-121 peptide
BGPR01005754.1_ORF.130	NC_001623.1_NP_054129.1	3.288	19	0.4384	0.024	0.4365	late expression factor 5
BGPR01005754.1_ORF.130	NC_005906.1_YP_025217.1	4.89	19	0.4996	0.024	0.5472	DNA polymerase
BGPR01005754.1_ORF.130	NC_001623.1_NP_054095.1	4.62	19	0.458	0.024	0.5491	DNA-dependant DNA-polymerase
BGPR01005754.1_ORF.130	NC_003084.1_NP_203384.1	2.476	18	0.3367	0.02	0.403	CUN080 hypothetical protein
BGPR01005754.1_ORF.130	NC_003084.1_NP_203333.1	2.211	18	0.2977	0.02	0.4176	CUN029 similar to AcMNPV ORF119
BGPR01005754.1_ORF.130	NC_001973.1_NP_047720.1	3.48	18	0.3483	0.02	0.4916	DNA polymerase
BGPR01005754.1_ORF.130	NC_002816.1_NP_148895.1	4.366	18	0.4277	0.02	0.4952	ORF111 DNAPOL
BGPR01005754.1_ORF.130	NC_003084.1_NP_203397.1	3.683	17	0.3311	0.016	0.4844	CUN093 hypothetical protein
BGPR01005754.1_ORF.130	NC_003084.1_NP_203345.1	4.125	16	0.3189	0.014	0.519	CUN042 hypothetical protein
BGPR01005754.1_ORF.130	NC_001973.1_NP_047759.1	1.573	16	0.1957	0.014	0.4369	LdOrf-122 peptide
BGPR01005754.1_ORF.130	NC_003084.1_NP_203310.1	6.87	15	0.4596	0.011	0.4858	CUN007 hypothetical protein
BGPR01005754.1_ORF.130	NC_001623.1_NP_054041.1	3.898	15	0.2874	0.011	0.4493	AcOrf-12 peptide
BGPR01005754.1_ORF.130	NC_001623.1_NP_054133.1	7.271	15	0.5142	0.011	0.515	hypothetical protein
BGPR01005754.1_ORF.130	NC_005906.1_YP_025258.1	3.683	15	0.3057	0.011	0.4219	helicase
BGPR01005754.1_ORF.130	NC_003084.1_NP_203367.1	3.683	14	0.2358	0.01	0.478	CUN063 hypothetical protein
BGPR01005754.1_ORF.130	NC_003084.1_NP_203346.1	6.87	14	0.4425	0.01	0.4633	CUN041 hypothetical protein
BGPR01005754.1_ORF.130	NC_001973.1_NP_047726.1	4.62	14	0.3613	0.01	0.3667	LdOrf-81 peptide
BGPR01005754.1_ORF.130	NC_001623.1_NP_054111.1	8.143	14	0.4897	0.01	0.4886	AcOrf-81 peptide
BGPR01005754.1_ORF.130	NC_001973.1_NP_047737.1	5.477	14	0.379	0.01	0.4071	late expression factor 5
BGPR01005754.1_ORF.130	NC_001623.1_NP_054047.1	2.34	14	0.2509	0.01	0.3356	AcOrf-18 peptide
BGPR01005754.1_ORF.130	NC_001973.1_NP_047741.1	7.695	14	0.4922	0.01	0.4843	LdOrf-104 peptide
BGPR01005754.1_ORF.130	NC_001973.1_NP_047728.1	5.796	14	0.3794	0.01	0.4476	capsid associated protein
BGPR01005754.1_ORF.130	NC_001973.1_NP_047717.1	4.366	13	0.2589	0.009	0.4434	LdOrf-80 peptide
BGPR01005754.1_ORF.130	NC_002816.1_NP_148871.1	5.796	13	0.3786	0.009	0.41	ORF87 LEF-5
BGPR01005754.1_ORF.130	NC_001623.1_NP_054118.1	4.89	13	0.2903	0.009	0.4446	hypothetical protein
BGPR01005754.1_ORF.130	NC_001623.1_NP_054042.1	4.125	13	0.2554	0.009	0.4103	AcOrf-13 peptide
BGPR01005754.1_ORF.130	NC_002816.1_NP_148791.1	7.695	13	0.4684	0.009	0.4566	ORF7 IE-1
BGPR01005754.1_ORF.130	NC_003084.1_NP_203396.1	5.477	13	0.349	0.009	0.4066	CUN091 putative dnapolymerase, similar to AcMNPV ORF65
BGPR01005754.1_ORF.130	NC_002816.1_NP_148793.1	5.796	12	0.2551	0.008	0.504	ORF9 similar to AcMNPV ORF145
BGPR01005754.1_ORF.130	NC_002816.1_NP_148861.1	3.683	12	0.1978	0.008	0.4253	ORF77 similar to XcGV ORF86
BGPR01005754.1_ORF.130	NC_002816.1_NP_148792.1	5.175	12	0.3128	0.008	0.367	ORF8 similar to AcMNPV ORF146
BGPR01005754.1_ORF.130	NC_003084.1_NP_203306.1	4.125	12	0.2075	0.008	0.4231	CUN002 hypothetical protein, ATP_GTP_A motif
BGPR01005754.1_ORF.130	NC_003084.1_NP_203308.1	5.175	12	0.3568	0.008	0.3014	CUN004 bro-like protein
BGPR01005754.1_ORF.130	NC_002816.1_NP_148927.1	3.898	12	0.204	0.008	0.4281	ORF143 ME53
BGPR01005754.1_ORF.130	NC_001973.1_NP_047729.1	8.617	12	0.4355	0.008	0.4878	capsid protein
BGPR01005754.1_ORF.130	NC_002816.1_NP_148907.1	4.62	12	0.2377	0.008	0.4628	ORF123 FGF
BGPR01005754.1_ORF.130	NC_003084.1_NP_203378.1	4.125	12	0.2697	0.008	0.3567	CUN074 putative p74 envelope protein, similar to AcMNPV ORF138
BGPR01005754.1_ORF.130	NC_001973.1_NP_047687.1	6.492	12	0.3062	0.008	0.4366	late expression factor 8
BGPR01005754.1_ORF.130	NC_001623.1_NP_054079.1	2.935	12	0.2663	0.008	0.284	late expression factor 8
BGPR01005754.1_ORF.130	NC_005906.1_YP_025209.1	9.649	11	0.4362	0.007	0.4648	hypothetical protein
BGPR01005754.1_ORF.130	NC_005906.1_YP_025264.1	5.796	11	0.2129	0.007	0.4686	hypothetical protein
BGPR01005754.1_ORF.130	NC_002816.1_NP_148887.1	6.87	11	0.3554	0.007	0.3807	ORF103 similar to AcMNPV ORF81
BGPR01005754.1_ORF.130	NC_002816.1_NP_148857.1	4.62	11	0.1961	0.007	0.4213	ORF73 38.7KD
BGPR01005754.1_ORF.130	NC_005906.1_YP_025255.1	6.492	11	0.3457	0.007	0.371	late expression factor-5
BGPR01005754.1_ORF.130	NC_005906.1_YP_025211.1	9.649	11	0.3525	0.007	0.5207	DNA binding protein
BGPR01005754.1_ORF.130	NC_003084.1_NP_203377.1	7.271	11	0.2848	0.007	0.5131	CUN073 putative p47 transcription regulator factor, similar to AcMNPV ORF40
BGPR01005754.1_ORF.130	NC_002816.1_NP_148799.1	7.271	11	0.291	0.007	0.4546	ORF15 P49
BGPR01005754.1_ORF.130	NC_002816.1_NP_148910.1	2.089	11	0.172	0.007	0.2927	ORF126 HELICASE-2
BGPR01005754.1_ORF.130	NC_002816.1_NP_148879.1	6.492	11	0.287	0.007	0.4377	ORF95 LEF-4
BGPR01005754.1_ORF.130	NC_003084.1_NP_203314.1	5.175	10	0.2722	0	0.323	CUN010 hypothetical protein
BGPR01005754.1_ORF.130	NC_001973.1_NP_047748.1	4.89	10	0.1945	0	0.4177	LdOrf-111 peptide
BGPR01005754.1_ORF.130	NC_003084.1_NP_203320.1	9.649	10	0.2889	0	0.5634	CUN016 hypothetical protein
BGPR01005754.1_ORF.130	NC_003084.1_NP_203364.1	9.118	10	0.3648	0	0.4095	CUN060 hypothetical protein
BGPR01005754.1_ORF.130	NC_001623.1_NP_054126.1	3.683	10	0.1725	0	0.3376	AcOrf-96 peptide
BGPR01005754.1_ORF.130	NC_005906.1_YP_025251.1	5.175	10	0.1879	0	0.3925	hypothetical protein
BGPR01005754.1_ORF.130	NC_005906.1_YP_025284.1	4.125	10	0.2015	0	0.3049	viral capsid associated protein
BGPR01005754.1_ORF.130	NC_001973.1_NP_047795.1	6.134	10	0.2493	0	0.3773	LdOrf-158 peptide
BGPR01005754.1_ORF.130	NC_001973.1_NP_047709.1	8.143	10	0.2511	0	0.5338	Ld-bro-d
BGPR01005754.1_ORF.130	NC_001623.1_NP_054185.1	4.62	9	0.2121	0	0.2922	AcOrf-154 peptide
BGPR01005754.1_ORF.130	NC_001973.1_NP_047672.1	7.271	9	0.2731	0	0.3236	LdOrf-36 peptide
BGPR01005754.1_ORF.130	NC_003084.1_NP_203362.1	9.649	9	0.3088	0	0.4759	CUN058 similar to AcMNPV ORF68
BGPR01005754.1_ORF.130	NC_001623.1_NP_054112.1	8.617	9	0.2657	0	0.4116	telokin-like protein-20
BGPR01005754.1_ORF.130	NC_002816.1_NP_148801.1	7.271	9	0.2282	0	0.374	ORF17 IAP-3
BGPR01005754.1_ORF.130	NC_005906.1_YP_025289.1	6.87	9	0.2758	0	0.2933	major viral capsid protein
BGPR01005754.1_ORF.130	NC_002816.1_NP_148808.1	5.477	9	0.1883	0	0.4018	ORF24 PE-38
BGPR01005754.1_ORF.130	NC_003084.1_NP_203400.1	9.649	9	0.3411	0	0.3574	CUN096 putative lef-4 transcription factor, similar to AcMNPV ORF90
BGPR01005754.1_ORF.130	NC_002816.1_NP_148820.1	4.62	8	0.1789	0	0.2925	ORF36
BGPR01005754.1_ORF.130	NC_002816.1_NP_148908.1	6.87	8	0.2574	0	0.2811	ORF124
BGPR01005754.1_ORF.130	NC_002816.1_NP_148898.1	8.617	8	0.2241	0	0.3668	ORF114 similar to AcMNPV ORF68
BGPR01005754.1_ORF.130	NC_001973.1_NP_047735.1	6.87	8	0.1636	0	0.3837	LdOrf-98 peptide
BGPR01005754.1_ORF.130	NC_001623.1_NP_054070.1	9.649	8	0.2315	0	0.4197	AcOrf-41 peptide
BGPR01005754.1_ORF.130	NC_001623.1_NP_054067.1	7.271	8	0.1844	0	0.394	AcOrf-38 peptide
BGPR01005754.1_ORF.130	NC_001973.1_NP_047670.1	8.617	8	0.2165	0	0.4446	LdOrf-34 peptide
BGPR01005754.1_ORF.130	NC_005906.1_YP_025231.1	9.118	8	0.227	0	0.445	unkown
BGPR01005754.1_ORF.130	NC_001973.1_NP_047686.1	5.175	8	0.1793	0	0.3047	Ld-helicase-2
BGPR01005754.1_ORF.130	NC_003084.1_NP_203383.1	7.695	7	0.1861	0	0.3386	CUN079 hypothetical protein
BGPR01005754.1_ORF.130	NC_001623.1_NP_054165.1	6.87	7	0.2004	0	0.2964	annihilator
BGPR01005754.1_ORF.130	NC_001973.1_NP_047659.1	6.134	7	0.1626	0	0.2987	LdOrf-23 peptide
BGPR01005754.1_ORF.130	NC_003084.1_NP_203330.1	8.617	7	0.1978	0	0.3693	CUN026 putative lef-8 late transcription factor, Rna_Pol_Beta motif, similar to AcMNPV ORF50
BGPR01005754.1_ORF.130	NC_001623.1_NP_054176.1	9.118	6	0.1708	0	0.3603	AcOrf-145 peptide
BGPR01005754.1_ORF.130	NC_003084.1_NP_203365.1	9.649	6	0.2442	0	0.2782	CUN061 hypothetical protein
BGPR01005754.1_ORF.130	NC_001623.1_NP_054060.1	9.118	6	0.2499	0	0.2582	superoxide dismutase
BGPR01005754.1_ORF.130	NC_001973.1_NP_047782.1	9.118	6	0.2464	0	0.2652	superoxide dismutase
BGPR01005754.1_ORF.130	NC_002816.1_NP_148873.1	8.617	6	0.1974	0	0.2798	ORF89 similar to AcMNPV ORF96
BGPR01005754.1_ORF.130	NC_001623.1_NP_054177.1	7.271	6	0.174	0	0.2761	AcOrf-146 peptide
BGPR01005754.1_ORF.130	NC_001973.1_NP_047652.1	9.118	6	0.1717	0	0.3103	LdOrf-16 peptide
BGPR01005754.1_ORF.130	NC_001623.1_NP_054162.1	6.492	6	0.174	0	0.2458	AcOrf-132 peptide
BGPR01005754.1_ORF.130	NC_001623.1_NP_054149.1	7.271	6	0.1293	0	0.3066	AcOrf-119 peptide
BGPR01005754.1_ORF.130	NC_002816.1_NP_148915.1	8.143	6	0.2212	0	0.2535	ORF131 LEF-8
BGPR01036730.1_ORF.6	NC_001623.1_NP_054129.1	2.396	16	0.2978	0.014	0.5424	late expression factor 5
BGPR01036730.1_ORF.6	NC_001973.1_NP_047788.1	5.056	12	0.3686	0.008	0.4753	LdOrf-151 peptide
BGPR01036730.1_ORF.6	NC_001973.1_NP_047793.1	7.097	10	0.3243	0	0.5436	fibroblast growth factor
BGPR01036730.1_ORF.6	NC_003084.1_NP_203367.1	7.097	9	0.2862	0	0.4672	CUN063 hypothetical protein
BGPR01036730.1_ORF.6	NC_003084.1_NP_203345.1	6.632	9	0.249	0	0.4508	CUN042 hypothetical protein
BGPR01036730.1_ORF.6	NC_003084.1_NP_203386.1	8.697	9	0.3532	0	0.5222	CUN082 hypothetical protein
BGPR01036730.1_ORF.6	NC_002816.1_NP_148871.1	9.958	8	0.3021	0	0.5694	ORF87 LEF-5
BGPR01036730.1_ORF.6	NC_002816.1_NP_148922.1	5.791	8	0.2166	0	0.4194	ORF138 VP1054
BGPR01036730.1_ORF.6	NC_003084.1_NP_203384.1	3.365	8	0.1419	0	0.3887	CUN080 hypothetical protein
BGPR01036730.1_ORF.6	NC_002816.1_NP_148867.1	4.724	8	0.1744	0	0.4256	ORF83 similar to AcMNPV ORF103
BGPR01036730.1_ORF.6	NC_002816.1_NP_148861.1	4.414	7	0.1539	0	0.3278	ORF77 similar to XcGV ORF86
BGPR01036730.1_ORF.6	NC_001623.1_NP_054078.1	7.097	7	0.2632	0	0.3086	proliferating cell nuclear antigen
BGPR01036730.1_ORF.6	NC_005906.1_YP_025237.1	9.958	7	0.308	0	0.4281	late expression factor-9
BGPR01036730.1_ORF.6	NC_003084.1_NP_203324.1	9.958	5	0.2003	0	0.4024	CUN020 hypothetical protein
BGPR01003736.1_ORF.164	NC_002816.1_NP_148841.1	0.3402	16	0.1547	0.014	0.2465	ORF57 39K
BGPR01003736.1_ORF.164	NC_005906.1_YP_025204.1	4.732	15	0.4336	0.011	0.3569	hypothetical protein
BGPR01003736.1_ORF.164	NC_001623.1_NP_054048.1	2.416	12	0.2077	0.008	0.2749	AcOrf-19 peptide
BGPR01003736.1_ORF.164	NC_001973.1_NP_047732.1	6.621	10	0.4086	0	0.2284	LdOrf-93 peptide
BGPR01003736.1_ORF.164	NC_005906.1_YP_025214.1	3.576	10	0.232	0	0.2614	hypothetical protein
BGPR01003736.1_ORF.164	NC_001623.1_NP_054043.1	8.281	10	0.4698	0	0.2653	late expression factor 1
BGPR01003736.1_ORF.164	NC_001973.1_NP_047775.1	7.002	10	0.4297	0	0.27	LdOrf-138 peptide
BGPR01003736.1_ORF.164	NC_003084.1_NP_203406.1	8.281	10	0.3716	0	0.377	CUN102 putative odv-e56 envelope protein, similar to AcMNPV ORF148
BGPR01003736.1_ORF.164	NC_005906.1_YP_025287.1	6.621	9	0.2674	0	0.2882	hypothetical protein
BGPR01003736.1_ORF.164	NC_002816.1_NP_148882.1	4.474	9	0.2036	0	0.2606	ORF98 PTP-2
BGPR01003736.1_ORF.164	NC_002816.1_NP_148788.1	4.231	9	0.2008	0	0.2951	ORF4 similar to XcGV ORF7
BGPR01003736.1_ORF.164	NC_003084.1_NP_203366.1	7.831	9	0.2899	0	0.3559	CUN062 hypothetical protein
BGPR01003736.1_ORF.164	NC_001623.1_NP_054068.1	5.293	9	0.2606	0	0.2316	hypothetical protein
BGPR01003736.1_ORF.164	NC_001973.1_NP_047741.1	2.416	9	0.134	0	0.2605	LdOrf-104 peptide
BGPR01003736.1_ORF.164	NC_001623.1_NP_054059.1	4.474	9	0.2055	0	0.2792	AcOrf-30 peptide
BGPR01003736.1_ORF.164	NC_002816.1_NP_148893.1	3.197	8	0.1749	0	0.2154	ORF109
BGPR01003736.1_ORF.164	NC_001973.1_NP_047691.1	4.732	8	0.2281	0	0.2115	LdOrf-55 peptide
BGPR01003736.1_ORF.164	NC_002816.1_NP_148869.1	4.231	8	0.1729	0	0.2636	ORF85 similar to AcMNPV ORF101
BGPR01003736.1_ORF.164	NC_001623.1_NP_054075.1	5.92	8	0.2584	0	0.2538	occlusion-derived virus envelope protein
BGPR01003736.1_ORF.164	NC_005906.1_YP_025241.1	8.281	7	0.2776	0	0.2554	hypothetical protein
BGPR01003736.1_ORF.164	NC_001623.1_NP_054103.1	8.281	7	0.2285	0	0.284	AcOrf-73 peptide
BGPR01003736.1_ORF.164	NC_001623.1_NP_054105.1	7.002	7	0.1871	0	0.2706	AcOrf-75 peptide
BGPR01003736.1_ORF.164	NC_001623.1_NP_054039.1	7.405	7	0.205	0	0.3188	protein kinase
BGPR01003736.1_ORF.164	NC_002816.1_NP_148881.1	8.757	7	0.2715	0	0.2562	ORF97 ODV-EC27
BGPR01003736.1_ORF.164	NC_001973.1_NP_047650.1	8.281	7	0.2638	0	0.2221	envelope protein
BGPR01003736.1_ORF.164	NC_001623.1_NP_054131.1	8.757	7	0.2392	0	0.3114	hypothetical protein
BGPR01003736.1_ORF.164	NC_003084.1_NP_203373.1	8.281	7	0.2225	0	0.2813	CUN069 similar to AcMNPV ORF109
BGPR01003736.1_ORF.164	NC_002816.1_NP_148925.1	7.405	7	0.2204	0	0.2712	ORF141 EGT
BGPR01003736.1_ORF.164	NC_001973.1_NP_047778.1	5.92	7	0.1662	0	0.2427	LdOrf-141 peptide
BGPR01003736.1_ORF.164	NC_002816.1_NP_148825.1	5.293	6	0.1345	0	0.2243	ORF41 LEF-2
BGPR01003736.1_ORF.164	NC_001973.1_NP_047657.1	8.757	6	0.2125	0	0.288	immediate early transactivator 0
BGPR01003736.1_ORF.164	NC_005906.1_YP_025289.1	6.261	6	0.1404	0	0.2836	major viral capsid protein
BGPR01003736.1_ORF.164	NC_002816.1_NP_148919.1	7.002	6	0.2078	0	0.18	ORF135 similar to XcGV ORF172
BGPR01003736.1_ORF.164	NC_001973.1_NP_047671.1	5.598	6	0.1393	0	0.2568	LdOrf-35 peptide
BGPR01003736.1_ORF.164	NC_005906.1_YP_025231.1	7.405	6	0.1628	0	0.3027	unkown
BGPR01003736.1_ORF.164	NC_002816.1_NP_148901.1	4.474	6	0.1358	0	0.2194	ORF117 LEF-9
BGPR01003736.1_ORF.164	NC_001623.1_NP_054134.1	7.002	6	0.1591	0	0.2436	viral capsid associated protein
BGPR01003736.1_ORF.164	NC_001623.1_NP_054116.1	5.92	6	0.1396	0	0.2476	polynucleotide kinase/ligase
BGPR01003736.1_ORF.164	NC_005906.1_YP_025258.1	7.831	6	0.1746	0	0.2531	helicase
BGPR01003736.1_ORF.164	NC_001623.1_NP_054035.1	8.281	5	0.1692	0	0.2219	late expression factor 2
BGPR01003736.1_ORF.164	NC_005906.1_YP_025213.1	8.281	5	0.1543	0	0.2536	hypothetical protein
BGPR01003736.1_ORF.164	NC_003084.1_NP_203317.1	9.26	5	0.1914	0	0.2481	CUN014 similar to AcMNPV ORF92
BGPR01003736.1_ORF.164	NC_001623.1_NP_054133.1	7.831	5	0.1401	0	0.2631	hypothetical protein
BGPR01003736.1_ORF.164	NC_003084.1_NP_203315.1	7.831	5	0.1186	0	0.2404	CUN011 hypothetical protein
BGPR01003736.1_ORF.164	NC_005906.1_YP_025220.1	8.757	5	0.1494	0	0.2532	hypothetical protein
BGPR01006520.1_ORF.124	NC_001623.1_NP_054083.1	8.263	8	0.373	0	0.4278	late expression factor 10
BGPR01006520.1_ORF.124	NC_001623.1_NP_054131.1	7.096	7	0.2659	0	0.3603	hypothetical protein
BGPR01006520.1_ORF.124	NC_005906.1_YP_025239.1	7.657	6	0.2421	0	0.3676	hypothetical protein
BGPR01006520.1_ORF.124	NC_001973.1_NP_047734.1	9.621	6	0.3158	0	0.4045	helicase
BGPR01006520.1_ORF.124	NC_001973.1_NP_047697.1	8.263	5	0.2098	0	0.2947	LdOrf-61 peptide
BGPR01006520.1_ORF.124	NC_002816.1_NP_148862.1	9.621	4	0.1978	0	0.3492	ORF78
BGPR01006520.1_ORF.155	NC_001973.1_NP_047766.1	2.395	17	0.3914	0.016	0.7029	LdOrf-129 peptide
BGPR01006520.1_ORF.155	NC_002816.1_NP_148868.1	5.963	11	0.4483	0.007	0.5551	ORF84 similar to AcMNPV ORF102
BGPR01006520.1_ORF.155	NC_001973.1_NP_047770.1	8.305	10	0.4803	0	0.6733	LdOrf-133 peptide
BGPR01006520.1_ORF.155	NC_001973.1_NP_047637.1	9.022	9	0.4254	0	0.7032	polyhedrin
BGPR01006520.1_ORF.155	NC_003084.1_NP_203386.1	6.478	8	0.2836	0	0.506	CUN082 hypothetical protein
BGPR01006520.1_ORF.233	NC_002816.1_NP_148822.1	1.039	25	0.4233	0.057	0.7801	ORF38 similar to XcGV ORF33
BGPR01006520.1_ORF.233	NC_001973.1_NP_047755.1	2.756	19	0.4888	0.024	0.738	LdOrf-118 peptide
BGPR01006520.1_ORF.233	NC_001973.1_NP_047761.1	2.756	16	0.3099	0.014	0.776	LdOrf-124 peptide
BGPR01006520.1_ORF.233	NC_001973.1_NP_047655.1	5.725	14	0.4995	0.01	0.7163	LdOrf-odv-e18 peptide
BGPR01006520.1_ORF.233	NC_001623.1_NP_054145.1	6.209	14	0.5424	0.01	0.6987	AcOrf-115 peptide
BGPR01006520.1_ORF.233	NC_002816.1_NP_148834.1	6.209	14	0.4947	0.01	0.8214	ORF50 similar to XcGV ORF47
BGPR01006520.1_ORF.233	NC_002816.1_NP_148857.1	3.516	13	0.3011	0.009	0.7199	ORF73 38.7KD
BGPR01006520.1_ORF.233	NC_001973.1_NP_047716.1	3.516	13	0.2517	0.009	0.7549	apoptosis inhibitor
BGPR01006520.1_ORF.233	NC_001973.1_NP_047651.1	4.867	11	0.2885	0.007	0.696	immediate early transactivator 1
BGPR01006520.1_ORF.233	NC_002816.1_NP_148833.1	6.734	10	0.2928	0	0.72	ORF49 similar to XcGV ORF46
BGPR01006520.1_ORF.233	NC_005906.1_YP_025223.1	9.315	9	0.4214	0	0.609	hypothetical protein
BGPR01006520.1_ORF.233	NC_003084.1_NP_203363.1	5.278	9	0.2314	0	0.6131	CUN059 putative lef-9 transcription factor, RNApol motif, similar to AcMNPV ORF62
BGPR01006520.1_ORF.233	NC_001973.1_NP_047685.1	8.59	8	0.3017	0	0.6879	LdOrf-49 peptide
BGPR01006520.1_ORF.233	NC_001623.1_NP_054129.1	9.315	8	0.2927	0	0.7038	late expression factor 5
BGPR01006520.1_ORF.233	NC_002816.1_NP_148879.1	8.59	6	0.2044	0	0.6228	ORF95 LEF-4
BGPR01017730.1_ORF.14	NC_002816.1_NP_148806.1	8.955	14	0.7789	0.01	0.8213	ORF22 similar to XcGV ORF19
BGPR01017730.1_ORF.14	NC_003084.1_NP_203311.1	8.955	11	0.5264	0.007	0.7231	CUN006 hypothetical protein
BGPR01017730.1_ORF.48	NC_005906.1_YP_025259.1	4.7e-13	248	0.3908	1	0.4679	late expression factor-4	LEF-4
BGPR01017730.1_ORF.48	NC_002816.1_NP_148879.1	6.35e-12	231	0.4013	1	0.4715	ORF95 LEF-4	LEF-4
BGPR01017730.1_ORF.48	NC_001973.1_NP_047730.1	1.105e-11	223	0.399	1	0.4574	late expression factor 4	LEF-4
BGPR01017730.1_ORF.48	NC_001623.1_NP_054120.1	3.141e-09	177	0.3898	1	0.457	late expression factor 4	LEF-4
BGPR01017730.1_ORF.48	NC_002816.1_NP_148904.1	3.192e-06	89	0.2658	0.996	0.3413	ORF120 DNALIGASE	DNALIGASE
BGPR01017730.1_ORF.48	NC_001973.1_NP_047658.1	0.0002997	62	0.2657	0.817	0.3179	DNA ligase
BGPR01017730.1_ORF.48	NC_001623.1_NP_054135.1	0.02018	58	0.4352	0.72	0.4129	hypothetical protein
BGPR01017730.1_ORF.48	NC_001623.1_NP_054116.1	0.03322	50	0.3961	0.473	0.3816	polynucleotide kinase/ligase
BGPR01017730.1_ORF.48	NC_001623.1_NP_054117.1	2.117	27	0.4503	0.069	0.5856	p15
BGPR01017730.1_ORF.48	NC_001973.1_NP_047670.1	1.793	18	0.5675	0.02	0.1763	LdOrf-34 peptide
BGPR01017730.1_ORF.48	NC_005906.1_YP_025273.1	1.793	18	0.2612	0.02	0.3834	hypothetical protein
BGPR01017730.1_ORF.48	NC_003084.1_NP_203389.1	0.3402	17	0.1254	0.016	0.3186	CUN085 putative occlusion body protein
BGPR01017730.1_ORF.48	NC_002816.1_NP_148882.1	8.928	16	0.5768	0.014	0.5982	ORF98 PTP-2
BGPR01017730.1_ORF.48	NC_003084.1_NP_203399.1	0.7389	15	0.1542	0.011	0.3068	CUN095 putative bro protein, similar to AcMNPV ORF2
BGPR01017730.1_ORF.48	NC_003084.1_NP_203368.1	1.895	14	0.3193	0.01	0.2108	CUN064 hypothetical protein
BGPR01017730.1_ORF.48	NC_001973.1_NP_047718.1	0.1656	14	0.1071	0.01	0.1891	late expression factor 3
BGPR01017730.1_ORF.48	NC_001623.1_NP_054097.1	0.8254	14	0.1938	0.01	0.2269	late expression factor 3
BGPR01017730.1_ORF.48	NC_003084.1_NP_203361.1	0.1124	14	0.09327	0.01	0.1994	CUN057 hypothetical protein
BGPR01017730.1_ORF.48	NC_002816.1_NP_148830.1	3.484	13	0.3676	0.009	0.2606	ORF46 metalloproteinase
BGPR01017730.1_ORF.48	NC_002816.1_NP_148875.1	0.8724	12	0.1178	0.008	0.2758	ORF91 ODV-E25
BGPR01017730.1_ORF.48	NC_003084.1_NP_203372.1	1.286	12	0.159	0.008	0.2322	CUN068 hypothetical protein
BGPR01017730.1_ORF.48	NC_003084.1_NP_203376.1	2.641	12	0.2658	0.008	0.2264	CUN072 hypothetical protein
BGPR01017730.1_ORF.48	NC_001623.1_NP_054104.1	3.297	12	0.2088	0.008	0.335	AcOrf-74 peptide
BGPR01017730.1_ORF.48	NC_005906.1_YP_025239.1	2.364	12	0.1713	0.008	0.3596	hypothetical protein
BGPR01017730.1_ORF.48	NC_005906.1_YP_025231.1	2.641	12	0.1713	0.008	0.3915	unkown
BGPR01017730.1_ORF.48	NC_002816.1_NP_148907.1	0.2184	12	0.08932	0.008	0.201	ORF123 FGF
BGPR01017730.1_ORF.48	NC_001973.1_NP_047751.1	1.436	12	0.1405	0.008	0.3082	Ld-bro-j
BGPR01017730.1_ORF.48	NC_003084.1_NP_203320.1	3.119	11	0.1593	0.007	0.4058	CUN016 hypothetical protein
BGPR01017730.1_ORF.48	NC_005906.1_YP_025271.1	1.151	11	0.1576	0.007	0.212	hypothetical protein
BGPR01017730.1_ORF.48	NC_002816.1_NP_148873.1	2.002	11	0.1672	0.007	0.2685	ORF89 similar to AcMNPV ORF96
BGPR01017730.1_ORF.48	NC_001623.1_NP_054114.1	3.892	11	0.2796	0.007	0.2451	AcOrf-84 peptide
BGPR01017730.1_ORF.48	NC_002816.1_NP_148860.1	2.237	11	0.2215	0.007	0.207	ORF76 similar to XcGV ORF85
BGPR01017730.1_ORF.48	NC_003084.1_NP_203393.1	1.696	11	0.1899	0.007	0.1939	CUN090 putative similar to AcMNPV ORF96
BGPR01017730.1_ORF.48	NC_001973.1_NP_047733.1	1.793	11	0.1511	0.007	0.2506	Ld-odv-e25 peptide
BGPR01017730.1_ORF.48	NC_001623.1_NP_054031.1	2.237	11	0.1408	0.007	0.3615	baculovirus repeated ORF
BGPR01017730.1_ORF.48	NC_001973.1_NP_047790.1	3.297	11	0.1676	0.007	0.352	Ld-bro-n
BGPR01017730.1_ORF.48	NC_002816.1_NP_148791.1	6.771	11	0.6173	0.007	0.1808	ORF7 IE-1
BGPR01017730.1_ORF.48	NC_003084.1_NP_203313.1	3.484	10	0.1813	0	0.3171	CUN009 hypothetical protein
BGPR01017730.1_ORF.48	NC_002816.1_NP_148921.1	2.792	10	0.1649	0	0.2865	ORF137 LEF-10
BGPR01017730.1_ORF.48	NC_005906.1_YP_025226.1	5.134	10	0.236	0	0.3493	hypothetical protein
BGPR01017730.1_ORF.48	NC_001623.1_NP_054067.1	3.297	10	0.2651	0	0.1804	AcOrf-38 peptide
BGPR01017730.1_ORF.48	NC_001623.1_NP_054124.1	1.436	10	0.1357	0	0.2331	occlusion-derived virus envelope protein
BGPR01017730.1_ORF.48	NC_001623.1_NP_054166.1	5.134	10	0.3672	0	0.2076	hypothetical protein
BGPR01017730.1_ORF.48	NC_002816.1_NP_148924.1	0.4246	10	0.07426	0	0.219	ORF140 similar to XcGV ORF178
BGPR01017730.1_ORF.48	NC_001973.1_NP_047783.1	3.484	10	0.1571	0	0.3356	Ld-bro-l
BGPR01017730.1_ORF.48	NC_003084.1_NP_203400.1	0.8724	10	0.07389	0	0.2996	CUN096 putative lef-4 transcription factor, similar to AcMNPV ORF90
BGPR01017730.1_ORF.48	NC_001973.1_NP_047709.1	3.297	10	0.1916	0	0.2932	Ld-bro-d
BGPR01017730.1_ORF.48	NC_002816.1_NP_148885.1	0.6614	10	0.08674	0	0.2251	ORF101 VP91 capsid
BGPR01017730.1_ORF.48	NC_001973.1_NP_047702.1	0.9221	10	0.112	0	0.1899	viral enhancing factor 1
BGPR01017730.1_ORF.48	NC_002816.1_NP_148827.1	2.117	9	0.1906	0	0.1641	ORF43
BGPR01017730.1_ORF.48	NC_001973.1_NP_047735.1	2.002	9	0.1493	0	0.1902	LdOrf-98 peptide
BGPR01017730.1_ORF.48	NC_005906.1_YP_025245.1	2.117	9	0.1657	0	0.2009	hypothetical protein
BGPR01017730.1_ORF.48	NC_001973.1_NP_047643.1	3.892	9	0.187	0	0.2725	LdOrf-7 peptide
BGPR01017730.1_ORF.48	NC_002816.1_NP_148828.1	8.448	9	0.5518	0	0.183	ORF44
BGPR01017730.1_ORF.48	NC_003084.1_NP_203310.1	2.792	9	0.1513	0	0.2363	CUN007 hypothetical protein
BGPR01017730.1_ORF.48	NC_001623.1_NP_054178.1	2.364	9	0.1227	0	0.2908	early gene transactivator
BGPR01017730.1_ORF.48	NC_003084.1_NP_203305.1	3.683	9	0.1568	0	0.3171	CUN001 putative bro protein, ATP_GTP_A motif, similar to AcMNPV ORF 2
BGPR01017730.1_ORF.48	NC_001623.1_NP_054171.1	2.237	9	0.1115	0	0.3131	putative early gene transactivator
BGPR01017730.1_ORF.48	NC_003084.1_NP_203339.1	0.8724	9	0.08169	0	0.2456	CUN035 putative p91 capsid virion protein, similar to AcMNPV ORF83
BGPR01017730.1_ORF.48	NC_001973.1_NP_047797.1	5.134	9	0.3344	0	0.1763	viral enhancing factor 2
BGPR01017730.1_ORF.48	NC_001973.1_NP_047692.1	5.735	8	0.1797	0	0.3435	late expression factor 10
BGPR01017730.1_ORF.48	NC_001623.1_NP_054083.1	4.596	8	0.1906	0	0.2218	late expression factor 10
BGPR01017730.1_ORF.48	NC_005906.1_YP_025257.1	4.114	8	0.1545	0	0.2451	hypothetical protein
BGPR01017730.1_ORF.48	NC_001623.1_NP_054061.1	2.499	8	0.1372	0	0.2232	fibroblast growth factor
BGPR01017730.1_ORF.48	NC_001973.1_NP_047726.1	2.499	8	0.1116	0	0.2447	LdOrf-81 peptide
BGPR01017730.1_ORF.48	NC_001623.1_NP_054111.1	1.696	8	0.09054	0	0.254	AcOrf-81 peptide
BGPR01017730.1_ORF.48	NC_001973.1_NP_047787.1	7.563	8	0.2204	0	0.3092	Ld-bro-m
BGPR01017730.1_ORF.48	NC_001973.1_NP_047654.1	7.993	8	0.2034	0	0.4021	Ld-odv-e27
BGPR01017730.1_ORF.48	NC_001623.1_NP_054042.1	4.348	8	0.1286	0	0.3265	AcOrf-13 peptide
BGPR01017730.1_ORF.48	NC_003084.1_NP_203357.1	1.359	8	0.08086	0	0.2576	CUN054 putative alk-exo DNA processing exonuclease, similar to AcMNPV ORF133
BGPR01017730.1_ORF.48	NC_001973.1_NP_047684.1	7.156	8	0.2383	0	0.3137	Ld-p47
BGPR01017730.1_ORF.48	NC_003084.1_NP_203413.1	5.426	8	0.1567	0	0.2999	CUN109 putative bro protein, ATP_GTP_A motif, similar to AcMNPV ORF2
BGPR01017730.1_ORF.48	NC_005906.1_YP_025258.1	4.858	8	0.1259	0	0.3493	helicase
BGPR01017730.1_ORF.48	NC_003084.1_NP_203351.1	3.892	7	0.1565	0	0.2063	CUN047 hypothetical protein
BGPR01017730.1_ORF.48	NC_002816.1_NP_148861.1	3.683	7	0.2104	0	0.1342	ORF77 similar to XcGV ORF86
BGPR01017730.1_ORF.48	NC_002816.1_NP_148916.1	6.771	7	0.2385	0	0.2044	ORF132 similar to XcGV ORF165
BGPR01017730.1_ORF.48	NC_001973.1_NP_047753.1	2.792	7	0.1432	0	0.1739	dUTPase
BGPR01017730.1_ORF.48	NC_001973.1_NP_047788.1	3.683	7	0.1111	0	0.2735	LdOrf-151 peptide
BGPR01017730.1_ORF.48	NC_001973.1_NP_047641.1	5.426	7	0.2887	0	0.1557	LdOrf-5 peptide
BGPR01017730.1_ORF.48	NC_005906.1_YP_025251.1	5.735	7	0.1816	0	0.2336	hypothetical protein
BGPR01017730.1_ORF.48	NC_001973.1_NP_047764.1	6.407	7	0.1174	0	0.371	LdOrf-127 peptide
BGPR01017730.1_ORF.48	NC_001623.1_NP_054045.1	4.114	7	0.09612	0	0.3084	AcOrf-16 peptide
BGPR01017730.1_ORF.48	NC_001623.1_NP_054078.1	1.793	7	0.1029	0	0.1785	proliferating cell nuclear antigen
BGPR01017730.1_ORF.48	NC_005906.1_YP_025203.1	3.297	7	0.1338	0	0.1829	hypothetical protein
BGPR01017730.1_ORF.48	NC_003084.1_NP_203377.1	3.297	7	0.1039	0	0.2692	CUN073 putative p47 transcription regulator factor, similar to AcMNPV ORF40
BGPR01017730.1_ORF.48	NC_001973.1_NP_047708.1	5.426	7	0.2367	0	0.179	Ld-bro-c
BGPR01017730.1_ORF.48	NC_001623.1_NP_054149.1	3.119	7	0.107	0	0.2139	AcOrf-119 peptide
BGPR01017730.1_ORF.48	NC_005906.1_YP_025217.1	2.951	7	0.1603	0	0.1622	DNA polymerase
BGPR01017730.1_ORF.48	NC_001973.1_NP_047662.1	5.134	6	0.1873	0	0.1621	LdOrf-26 peptide
BGPR01017730.1_ORF.48	NC_001623.1_NP_054057.1	8.448	6	0.1418	0	0.309	late expression factor 6
BGPR01017730.1_ORF.48	NC_001623.1_NP_054126.1	6.771	6	0.1657	0	0.2485	AcOrf-96 peptide
BGPR01017730.1_ORF.48	NC_002816.1_NP_148786.1	9.435	6	0.142	0	0.3632	ORF2 similar to XcGV ORF2
BGPR01017730.1_ORF.48	NC_003084.1_NP_203379.1	7.993	6	0.1645	0	0.2869	CUN075 putative p35 apoptosis inhibitor, similar to AcMNPV ORF135
BGPR01017730.1_ORF.48	NC_002816.1_NP_148857.1	5.426	6	0.115	0	0.2441	ORF73 38.7KD
BGPR01017730.1_ORF.48	NC_001973.1_NP_047759.1	4.348	6	0.1059	0	0.2508	LdOrf-122 peptide
BGPR01017730.1_ORF.48	NC_005906.1_YP_025276.1	7.993	6	0.1443	0	0.3636	hypothetical protein
BGPR01017730.1_ORF.48	NC_001623.1_NP_054118.1	9.435	6	0.1338	0	0.3777	hypothetical protein
BGPR01017730.1_ORF.48	NC_001973.1_NP_047793.1	3.297	6	0.09531	0	0.2252	fibroblast growth factor
BGPR01017730.1_ORF.48	NC_002816.1_NP_148866.1	9.435	6	0.1582	0	0.3637	ORF82 similar to XcGV ORF90
BGPR01017730.1_ORF.48	NC_001973.1_NP_047798.1	6.771	6	0.1408	0	0.3022	Ld-bro-p
BGPR01017730.1_ORF.48	NC_001973.1_NP_047795.1	6.062	6	0.208	0	0.1458	LdOrf-158 peptide
BGPR01017730.1_ORF.48	NC_002816.1_NP_148808.1	8.448	6	0.1341	0	0.3917	ORF24 PE-38
BGPR01017730.1_ORF.48	NC_003084.1_NP_203408.1	2.951	6	0.0861	0	0.219	CUN104 putative Ld130 envelope fusion protein, similar to AcMNPV ORF23
BGPR01017730.1_ORF.48	NC_002816.1_NP_148821.1	7.563	6	0.2318	0	0.1684	ORF37 ODV-E66
BGPR01017730.1_ORF.48	NC_005906.1_YP_025206.1	4.348	6	0.09916	0	0.2502	hypothetical protein
BGPR01017730.1_ORF.48	NC_003084.1_NP_203394.1	7.993	6	0.1306	0	0.3095	CUN089 putative helicase-1, DNA replication, similar to AcMNPV ORF95
BGPR01017730.1_ORF.48	NC_005906.1_YP_025272.1	3.683	5	0.1163	0	0.1419	hypothetical protein
BGPR01017730.1_ORF.48	NC_003084.1_NP_203382.1	6.771	5	0.1384	0	0.2208	CUN078 hypothetical protein
BGPR01017730.1_ORF.48	NC_003084.1_NP_203380.1	9.435	5	0.2162	0	0.1977	CUN076 hypothetical protein
BGPR01017730.1_ORF.48	NC_002816.1_NP_148814.1	8.928	5	0.1462	0	0.2819	ORF30 similar to XcGV ORF26
BGPR01017730.1_ORF.48	NC_005906.1_YP_025290.1	6.062	5	0.1433	0	0.1624	hypothetical protein
BGPR01017730.1_ORF.48	NC_003084.1_NP_203306.1	9.435	5	0.183	0	0.227	CUN002 hypothetical protein, ATP_GTP_A motif
BGPR01017730.1_ORF.48	NC_001973.1_NP_047682.1	4.596	5	0.1348	0	0.1347	LdOrf-46 peptide
BGPR01017730.1_ORF.48	NC_003084.1_NP_203404.1	6.771	5	0.1245	0	0.253	CUN100 hypothetical protein
BGPR01017730.1_ORF.48	NC_002816.1_NP_148813.1	4.114	5	0.08929	0	0.2274	ORF29 similar to XcGV ORF25
BGPR01017730.1_ORF.48	NC_005906.1_YP_025284.1	8.448	5	0.2219	0	0.1601	viral capsid associated protein
BGPR01017730.1_ORF.48	NC_003084.1_NP_203386.1	7.563	5	0.09609	0	0.3074	CUN082 hypothetical protein
BGPR01017730.1_ORF.48	NC_002816.1_NP_148867.1	5.735	5	0.129	0	0.1637	ORF83 similar to AcMNPV ORF103
BGPR01017730.1_ORF.48	NC_001973.1_NP_047767.1	6.771	5	0.07775	0	0.3013	envelope protein
BGPR01017730.1_ORF.48	NC_001623.1_NP_054164.1	7.993	5	0.1598	0	0.1923	hypothetical protein
BGPR01017730.1_ORF.48	NC_001623.1_NP_054113.1	3.484	5	0.07614	0	0.1727	viral capsid associated protein
BGPR01017730.1_ORF.48	NC_003084.1_NP_203330.1	8.448	5	0.1306	0	0.3037	CUN026 putative lef-8 late transcription factor, Rna_Pol_Beta motif, similar to AcMNPV ORF50
BGPR01017730.1_ORF.48	NC_001973.1_NP_047720.1	3.297	5	0.0858	0	0.1614	DNA polymerase
BGPR01017730.1_ORF.48	NC_003084.1_NP_203396.1	4.348	5	0.07948	0	0.2316	CUN091 putative dnapolymerase, similar to AcMNPV ORF65
BGPR01017730.1_ORF.48	NC_003084.1_NP_203383.1	9.435	4	0.1914	0	0.1534	CUN079 hypothetical protein
BGPR01017730.1_ORF.48	NC_003084.1_NP_203346.1	9.97	4	0.1735	0	0.1894	CUN041 hypothetical protein
BGPR01017730.1_ORF.48	NC_003084.1_NP_203340.1	7.993	4	0.1156	0	0.1767	CUN036 hypothetical protein
BGPR01017730.1_ORF.48	NC_002816.1_NP_148804.1	8.448	4	0.09533	0	0.3019	ORF20 similar to XcGV ORF17
BGPR01017730.1_ORF.48	NC_002816.1_NP_148797.1	7.156	4	0.1432	0	0.1505	ORF13 GP37
BGPR01017730.1_ORF.48	NC_001973.1_NP_047676.1	7.993	4	0.1219	0	0.2126	Ld-p26 peptide
BGPR01017730.1_ORF.48	NC_001973.1_NP_047750.1	7.563	4	0.09299	0	0.2546	Ld-bro-i
BGPR01017730.1_ORF.48	NC_005906.1_YP_025221.1	7.563	4	0.1304	0	0.1806	hypothetical protein
BGPR01017730.1_ORF.48	NC_002816.1_NP_148909.1	7.563	4	0.2439	0	0.07795	ORF125 ALK-EXO
BGPR01017730.1_ORF.48	NC_001973.1_NP_047792.1	7.156	4	0.08004	0	0.2287	LdOrf-155 peptide
BGPR01017730.1_ORF.48	NC_001623.1_NP_054095.1	4.348	4	0.06808	0	0.1577	DNA-dependant DNA-polymerase
BGPR01017730.1_ORF.48	NC_001973.1_NP_047672.1	9.97	3	0.128	0	0.1541	LdOrf-36 peptide
BGPR01017730.1_ORF.48	NC_002816.1_NP_148887.1	7.563	3	0.1022	0	0.1448	ORF103 similar to AcMNPV ORF81
BGPR01006520.1_ORF.248	NC_005906.1_YP_025266.1	7.378e-09	170	0.3461	1	0.6201	hypothetical protein
BGPR01006520.1_ORF.248	NC_002816.1_NP_148819.1	3.003e-08	167	0.378	1	0.6202	ORF35 similar to AcMNPV ORF115	PIF-3
BGPR01006520.1_ORF.248	NC_001973.1_NP_047780.1	6.64e-08	158	0.3551	1	0.6421	LdOrf-143 peptide	PIF-3
BGPR01006520.1_ORF.248	NC_003084.1_NP_203350.1	5.29e-07	155	0.3926	1	0.6938	CUN046 similar to AcMNPV ORF115	PIF-3
BGPR01006520.1_ORF.248	NC_001623.1_NP_054145.1	5.29e-07	133	0.3282	1	0.6074	AcOrf-115 peptide	PIF-3
BGPR01006520.1_ORF.248	NC_002816.1_NP_148859.1	1.428e-05	106	0.342	1	0.5608	ORF75 similar to AcMNPV ORF119	PIF-3
BGPR01006520.1_ORF.248	NC_001623.1_NP_054149.1	1.715e-05	103	0.3177	1	0.5833	AcOrf-119 peptide	PIF-1
BGPR01006520.1_ORF.248	NC_005906.1_YP_025277.1	3.793e-05	96	0.3399	0.999	0.5263	per os infectivity factor	PIF-1
BGPR01006520.1_ORF.248	NC_001973.1_NP_047792.1	3.357e-05	96	0.295	0.999	0.5994	LdOrf-155 peptide	PIF-1
BGPR01006520.1_ORF.248	NC_003084.1_NP_203333.1	2.795e-05	94	0.3082	0.998	0.5283	CUN029 similar to AcMNPV ORF119	PIF-1
BGPR01006520.1_ORF.248	NC_005906.1_YP_025252.1	0.03321	43	0.2669	0.277	0.5216	per os infectivity factor-2
BGPR01006520.1_ORF.248	NC_001973.1_NP_047756.1	0.03988	43	0.2716	0.277	0.5287	LdOrf-119 peptide
BGPR01006520.1_ORF.248	NC_003084.1_NP_203342.1	0.09372	40	0.2809	0.214	0.5743	CUN038 similar to AcMNPV ORF22
BGPR01006520.1_ORF.248	NC_002816.1_NP_148832.1	0.03988	37	0.2136	0.164	0.5202	ORF48 similar to AcMNPV ORF22
BGPR01006520.1_ORF.248	NC_001623.1_NP_054051.1	0.1059	35	0.2625	0.138	0.5107	AcOrf-22 peptide
BGPR01006520.1_ORF.248	NC_001623.1_NP_054108.1	2.24	22	0.3239	0.04	0.7076	AcOrf-78 peptide
BGPR01006520.1_ORF.248	NC_001973.1_NP_047773.1	8.065	15	0.4498	0.011	0.7267	polyhedral calyx protein
BGPR01006520.1_ORF.248	NC_001623.1_NP_054113.1	1.217	15	0.1902	0.011	0.3958	viral capsid associated protein
BGPR01006520.1_ORF.248	NC_003084.1_NP_203376.1	0.7024	13	0.1369	0.009	0.3045	CUN072 hypothetical protein
BGPR01006520.1_ORF.248	NC_003084.1_NP_203339.1	0.7466	13	0.1044	0.009	0.4001	CUN035 putative p91 capsid virion protein, similar to AcMNPV ORF83
BGPR01006520.1_ORF.248	NC_003084.1_NP_203382.1	3.23	12	0.3071	0.008	0.3098	CUN078 hypothetical protein
BGPR01006520.1_ORF.248	NC_001623.1_NP_054045.1	7.14	12	0.2902	0.008	0.6331	AcOrf-16 peptide
BGPR01006520.1_ORF.248	NC_001973.1_NP_047762.1	6.32	12	0.2497	0.008	0.6601	ecdysteroid UDP-glucosyltransferase
BGPR01006520.1_ORF.248	NC_001973.1_NP_047666.1	5.594	11	0.2577	0.007	0.4583	LdOrf-30 peptide
BGPR01006520.1_ORF.248	NC_002816.1_NP_148882.1	8.572	11	0.7008	0.007	0.2932	ORF98 PTP-2
BGPR01006520.1_ORF.248	NC_001973.1_NP_047764.1	8.065	11	0.3199	0.007	0.554	LdOrf-127 peptide
BGPR01006520.1_ORF.248	NC_001623.1_NP_054072.1	5.263	10	0.2358	0	0.4173	AcOrf-43 peptide
BGPR01006520.1_ORF.248	NC_005906.1_YP_025243.1	9.11	10	0.3007	0	0.6069	hypothetical protein
BGPR01006520.1_ORF.248	NC_001973.1_NP_047737.1	3.23	10	0.1683	0	0.3374	late expression factor 5
BGPR01006520.1_ORF.248	NC_001973.1_NP_047691.1	8.065	10	0.2069	0	0.7827	LdOrf-55 peptide
BGPR01006520.1_ORF.248	NC_001623.1_NP_054052.1	7.14	10	0.2028	0	0.6367	copia-like envelope protein
BGPR01006520.1_ORF.248	NC_001973.1_NP_047781.1	7.588	9	0.3495	0	0.3013	LdOrf-144 peptide
BGPR01006520.1_ORF.248	NC_003084.1_NP_203320.1	3.23	9	0.1464	0	0.3406	CUN016 hypothetical protein
BGPR01006520.1_ORF.248	NC_005906.1_YP_025255.1	2.859	9	0.1615	0	0.3125	late expression factor-5
BGPR01006520.1_ORF.248	NC_001973.1_NP_047654.1	4.123	9	0.3001	0	0.227	Ld-odv-e27
BGPR01006520.1_ORF.248	NC_005906.1_YP_025236.1	6.32	9	0.2428	0	0.3632	hypothetical protein
BGPR01006520.1_ORF.248	NC_002816.1_NP_148914.1	9.11	8	0.244	0	0.4558	ORF130 similar to PxGV ORF108
BGPR01006520.1_ORF.248	NC_001973.1_NP_047661.1	9.11	8	0.3835	0	0.2837	LdOrf-25 peptide
BGPR01006520.1_ORF.248	NC_003084.1_NP_203391.1	7.588	8	0.2173	0	0.4628	CUN088 putative lef-5 late expression factor, similar to AcMNPV ORF99
BGPR01006520.1_ORF.248	NC_001623.1_NP_054182.1	3.879	8	0.09469	0	0.4685	early gene transactivator
BGPR01006520.1_ORF.248	NC_003084.1_NP_203351.1	5.946	7	0.2395	0	0.2569	CUN047 hypothetical protein
BGPR01006520.1_ORF.248	NC_001623.1_NP_054090.1	8.572	7	0.2085	0	0.3921	AcOrf-60 peptide
BGPR01006520.1_ORF.248	NC_002816.1_NP_148921.1	4.659	7	0.1939	0	0.2243	ORF137 LEF-10
BGPR01006520.1_ORF.248	NC_001623.1_NP_054175.1	9.11	7	0.354	0	0.2854	occlusion-derived virus envelope/capsid protein
BGPR01006520.1_ORF.248	NC_005906.1_YP_025283.1	6.32	7	0.1543	0	0.3776	viral capsid associated protein
BGPR01006520.1_ORF.248	NC_002816.1_NP_148799.1	8.572	6	0.2348	0	0.2374	ORF15 P49
BGPR01006520.1_ORF.248	NC_003084.1_NP_203367.1	7.588	5	0.164	0	0.244	CUN063 hypothetical protein
BGPR01006520.1_ORF.248	NC_001973.1_NP_047733.1	8.065	5	0.1199	0	0.3541	Ld-odv-e25 peptide
BGPR01006520.1_ORF.248	NC_003084.1_NP_203336.1	9.681	5	0.213	0	0.2467	CUN032 putative odv-ec27 oclusion derived envelope protein, similar to AcMNPV ORF144
BGPR01006520.1_ORF.248	NC_003084.1_NP_203380.1	7.588	4	0.1254	0	0.2157	CUN076 hypothetical protein
BGPR01006520.1_ORF.248	NC_001973.1_NP_047643.1	9.11	4	0.1309	0	0.2504	LdOrf-7 peptide
BGPR01006520.1_ORF.248	NC_002816.1_NP_148785.1	9.11	4	0.09602	0	0.3601	ORF1 granulin
BGPR01006520.1_ORF.248	NC_001973.1_NP_047800.1	9.681	4	0.1131	0	0.2733	LdOrf-163 peptide
BGPR01005754.1_ORF.197	NC_005906.1_YP_025284.1	2.419	14	0.3788	0.01	0.2898	viral capsid associated protein
BGPR01005754.1_ORF.197	NC_002816.1_NP_148906.1	8.284	7	0.313	0	0.305	ORF122 similar to XcGV ORF143
BGPR01005754.1_ORF.197	NC_003084.1_NP_203324.1	7.765	7	0.2457	0	0.3549	CUN020 hypothetical protein
BGPR01005754.1_ORF.197	NC_005906.1_YP_025288.1	8.284	7	0.2514	0	0.3703	hypothetical protein
BGPR01005754.1_ORF.197	NC_001973.1_NP_047685.1	8.284	5	0.1415	0	0.3199	LdOrf-49 peptide
BGPR01005754.1_ORF.197	NC_001973.1_NP_047720.1	8.838	5	0.1583	0	0.3051	DNA polymerase
BGPR01068391.1_ORF.15	NC_002816.1_NP_148857.1	0.9116	20	0.2154	0.029	0.4494	ORF73 38.7KD
BGPR01068391.1_ORF.15	NC_001973.1_NP_047755.1	0.2543	19	0.1322	0.024	0.3721	LdOrf-118 peptide
BGPR01068391.1_ORF.15	NC_001623.1_NP_054055.1	2.445	18	0.4938	0.02	0.2935	AcOrf-26 peptide
BGPR01068391.1_ORF.15	NC_001623.1_NP_054114.1	0.573	18	0.1924	0.02	0.3184	AcOrf-84 peptide
BGPR01068391.1_ORF.15	NC_002816.1_NP_148855.1	1.15	18	0.202	0.02	0.4256	ORF71 P24capsid
BGPR01068391.1_ORF.15	NC_001623.1_NP_054151.1	4.368	16	0.6266	0.014	0.2863	AcOrf-121 peptide
BGPR01068391.1_ORF.15	NC_002816.1_NP_148833.1	1.829	16	0.2234	0.014	0.4397	ORF49 similar to XcGV ORF46
BGPR01068391.1_ORF.15	NC_002816.1_NP_148786.1	2.591	16	0.2366	0.014	0.4916	ORF2 similar to XcGV ORF2
BGPR01068391.1_ORF.15	NC_003084.1_NP_203350.1	5.509	16	0.4716	0.014	0.4927	CUN046 similar to AcMNPV ORF115
BGPR01068391.1_ORF.15	NC_001973.1_NP_047660.1	0.573	16	0.1285	0.014	0.3732	LdOrf-24 peptide
BGPR01068391.1_ORF.15	NC_005906.1_YP_025232.1	1.219	16	0.1823	0.014	0.4093	hypothetical protein
BGPR01068391.1_ORF.15	NC_001973.1_NP_047657.1	0.7227	16	0.1589	0.014	0.3544	immediate early transactivator 0
BGPR01068391.1_ORF.15	NC_002816.1_NP_148886.1	0.573	15	0.128	0.011	0.3492	ORF102 TLP20
BGPR01068391.1_ORF.15	NC_001973.1_NP_047666.1	4.629	14	0.4989	0.01	0.3106	LdOrf-30 peptide
BGPR01068391.1_ORF.15	NC_001623.1_NP_054109.1	6.556	14	0.7635	0.01	0.2827	AcOrf-79 peptide
BGPR01068391.1_ORF.15	NC_001623.1_NP_054048.1	2.177	14	0.235	0.01	0.3542	AcOrf-19 peptide
BGPR01068391.1_ORF.15	NC_001973.1_NP_047727.1	0.3207	14	0.08834	0.01	0.3346	LdOrf-82 peptide
BGPR01068391.1_ORF.15	NC_001623.1_NP_054110.1	1.291	14	0.1639	0.01	0.3595	occlusion-derived virus glycoprotein
BGPR01068391.1_ORF.15	NC_003084.1_NP_203333.1	2.054	14	0.1888	0.01	0.3911	CUN029 similar to AcMNPV ORF119
BGPR01068391.1_ORF.15	NC_001973.1_NP_047649.1	5.199	13	0.4092	0.009	0.3295	LdOrf-13 peptide
BGPR01068391.1_ORF.15	NC_003084.1_NP_203313.1	1.829	13	0.1776	0.009	0.361	CUN009 hypothetical protein
BGPR01068391.1_ORF.15	NC_001973.1_NP_047641.1	2.591	13	0.2683	0.009	0.2895	LdOrf-5 peptide
BGPR01068391.1_ORF.15	NC_002816.1_NP_148875.1	0.3602	13	0.1278	0.009	0.2236	ORF91 ODV-E25
BGPR01068391.1_ORF.15	NC_001973.1_NP_047683.1	1.085	13	0.2313	0.009	0.199	LdOrf-47; ssDNA binding protein
BGPR01068391.1_ORF.15	NC_001973.1_NP_047680.1	0.9661	13	0.1218	0.009	0.3513	Ld-39K/pp31
BGPR01068391.1_ORF.15	NC_002816.1_NP_148808.1	1.368	13	0.1338	0.009	0.384	ORF24 PE-38
BGPR01068391.1_ORF.15	NC_002816.1_NP_148907.1	0.8602	13	0.1555	0.009	0.2516	ORF123 FGF
BGPR01068391.1_ORF.15	NC_001623.1_NP_054134.1	1.219	13	0.1249	0.009	0.3713	viral capsid associated protein
BGPR01068391.1_ORF.15	NC_001623.1_NP_054079.1	1.939	13	0.2031	0.009	0.3381	late expression factor 8
BGPR01068391.1_ORF.15	NC_005906.1_YP_025262.1	6.947	12	0.3071	0.008	0.551	occlusion-derived virus envelope protein
BGPR01068391.1_ORF.15	NC_001973.1_NP_047721.1	2.177	12	0.1678	0.008	0.33	LdOrf-84 peptide
BGPR01068391.1_ORF.15	NC_001623.1_NP_054061.1	2.591	12	0.2913	0.008	0.2475	fibroblast growth factor
BGPR01068391.1_ORF.15	NC_001623.1_NP_054172.1	2.054	12	0.1586	0.008	0.336	hypothetical protein
BGPR01068391.1_ORF.15	NC_001623.1_NP_054065.1	1.629	12	0.1367	0.008	0.35	nuclear matrix associated phosphoprotein
BGPR01068391.1_ORF.15	NC_002816.1_NP_148865.1	2.054	12	0.2907	0.008	0.2059	ORF81 DBP
BGPR01068391.1_ORF.15	NC_001973.1_NP_047725.1	1.939	12	0.1578	0.008	0.3294	Ld-gp41
BGPR01068391.1_ORF.15	NC_002816.1_NP_148924.1	0.8602	12	0.1055	0.008	0.339	ORF140 similar to XcGV ORF178
BGPR01068391.1_ORF.15	NC_003084.1_NP_203326.1	2.054	12	0.1641	0.008	0.3441	CUN022 hypothetical protein
BGPR01068391.1_ORF.15	NC_005906.1_YP_025277.1	2.591	12	0.1814	0.008	0.3746	per os infectivity factor
BGPR01068391.1_ORF.15	NC_005906.1_YP_025279.1	1.368	12	0.2008	0.008	0.2246	late expression factor-8
BGPR01068391.1_ORF.15	NC_005906.1_YP_025241.1	4.122	11	0.279	0.007	0.2953	hypothetical protein
BGPR01068391.1_ORF.15	NC_002816.1_NP_148914.1	2.91	11	0.1901	0.007	0.3551	ORF130 similar to PxGV ORF108
BGPR01068391.1_ORF.15	NC_002816.1_NP_148892.1	2.91	11	0.1854	0.007	0.3386	ORF108 similar to AcMNPV ORF75
BGPR01068391.1_ORF.15	NC_003084.1_NP_203319.1	1.537	11	0.1147	0.007	0.3478	CUN015 hypothetical protein
BGPR01068391.1_ORF.15	NC_001623.1_NP_054166.1	0.9116	11	0.1302	0.007	0.2225	hypothetical protein
BGPR01068391.1_ORF.15	NC_001973.1_NP_047723.1	1.45	11	0.1282	0.007	0.2937	very late factor 1
BGPR01068391.1_ORF.15	NC_002816.1_NP_148869.1	0.7659	11	0.0821	0.007	0.3438	ORF85 similar to AcMNPV ORF101
BGPR01068391.1_ORF.15	NC_001623.1_NP_054182.1	1.939	11	0.1336	0.007	0.3461	early gene transactivator
BGPR01068391.1_ORF.15	NC_003084.1_NP_203339.1	2.445	11	0.2161	0.007	0.2662	CUN035 putative p91 capsid virion protein, similar to AcMNPV ORF83
BGPR01068391.1_ORF.15	NC_005906.1_YP_025285.1	6.947	10	0.6107	0	0.2055	hypothetical protein
BGPR01068391.1_ORF.15	NC_001623.1_NP_054185.1	3.67	10	0.1694	0	0.345	AcOrf-154 peptide
BGPR01068391.1_ORF.15	NC_001973.1_NP_047710.1	5.838	10	0.3142	0	0.2773	Ld-bro-e
BGPR01068391.1_ORF.15	NC_003084.1_NP_203382.1	4.629	10	0.3053	0	0.259	CUN078 hypothetical protein
BGPR01068391.1_ORF.15	NC_003084.1_NP_203364.1	1.939	10	0.1609	0	0.2626	CUN060 hypothetical protein
BGPR01068391.1_ORF.15	NC_002816.1_NP_148863.1	3.89	10	0.2178	0	0.2914	ORF79 similar to AcMNPV ORF150
BGPR01068391.1_ORF.15	NC_001623.1_NP_054112.1	2.177	10	0.1157	0	0.3617	telokin-like protein-20
BGPR01068391.1_ORF.15	NC_001623.1_NP_054165.1	1.219	10	0.1518	0	0.184	annihilator
BGPR01068391.1_ORF.15	NC_001623.1_NP_054050.1	5.838	10	0.24	0	0.381	actin rearrangement inducing factor
BGPR01068391.1_ORF.15	NC_001973.1_NP_047800.1	5.838	10	0.2543	0	0.377	LdOrf-163 peptide
BGPR01068391.1_ORF.15	NC_003084.1_NP_203361.1	2.746	10	0.154	0	0.3388	CUN057 hypothetical protein
BGPR01068391.1_ORF.15	NC_005906.1_YP_025288.1	3.084	10	0.1305	0	0.3814	hypothetical protein
BGPR01068391.1_ORF.15	NC_001973.1_NP_047701.1	3.89	10	0.2019	0	0.3345	late expression factor 9
BGPR01068391.1_ORF.15	NC_003084.1_NP_203400.1	0.8602	10	0.08352	0	0.2813	CUN096 putative lef-4 transcription factor, similar to AcMNPV ORF90
BGPR01068391.1_ORF.15	NC_001973.1_NP_047742.1	2.054	10	0.1159	0	0.3584	Ld-vp80
BGPR01068391.1_ORF.15	NC_003084.1_NP_203394.1	2.445	10	0.1402	0	0.3494	CUN089 putative helicase-1, DNA replication, similar to AcMNPV ORF95
BGPR01068391.1_ORF.15	NC_003084.1_NP_203395.1	3.67	10	0.1733	0	0.3509	CUN092 hypothetical protein
BGPR01068391.1_ORF.15	NC_003084.1_NP_203381.1	9.834	9	0.4375	0	0.346	CUN077 hypothetical protein
BGPR01068391.1_ORF.15	NC_002816.1_NP_148921.1	4.122	9	0.1617	0	0.3758	ORF137 LEF-10
BGPR01068391.1_ORF.15	NC_003084.1_NP_203320.1	4.122	9	0.2055	0	0.2511	CUN016 hypothetical protein
BGPR01068391.1_ORF.15	NC_001973.1_NP_047761.1	5.838	9	0.192	0	0.4282	LdOrf-124 peptide
BGPR01068391.1_ORF.15	NC_003084.1_NP_203409.1	3.463	9	0.1483	0	0.3033	CUN105 hypothetical protein
BGPR01068391.1_ORF.15	NC_001973.1_NP_047679.1	4.368	9	0.1359	0	0.4215	viral ubiquitin
BGPR01068391.1_ORF.15	NC_001623.1_NP_054148.1	4.629	9	0.1997	0	0.3283	AcOrf-118 peptide
BGPR01068391.1_ORF.15	NC_001973.1_NP_047732.1	6.947	9	0.2451	0	0.3475	LdOrf-93 peptide
BGPR01068391.1_ORF.15	NC_001973.1_NP_047682.1	7.362	9	0.4319	0	0.2119	LdOrf-46 peptide
BGPR01068391.1_ORF.15	NC_001623.1_NP_054054.1	4.122	9	0.3018	0	0.1979	ssDNA binding protein
BGPR01068391.1_ORF.15	NC_001623.1_NP_054097.1	2.177	9	0.1159	0	0.322	late expression factor 3
BGPR01068391.1_ORF.15	NC_002816.1_NP_148811.1	9.834	9	0.2486	0	0.5302	ORF27
BGPR01068391.1_ORF.15	NC_003084.1_NP_203399.1	7.801	9	0.2712	0	0.3884	CUN095 putative bro protein, similar to AcMNPV ORF2
BGPR01068391.1_ORF.15	NC_005906.1_YP_025259.1	3.463	9	0.2185	0	0.234	late expression factor-4
BGPR01068391.1_ORF.15	NC_001623.1_NP_054038.1	3.463	9	0.1438	0	0.3317	viral capsid associated protein
BGPR01068391.1_ORF.15	NC_001623.1_NP_054178.1	3.67	9	0.169	0	0.3345	early gene transactivator
BGPR01068391.1_ORF.15	NC_003084.1_NP_203351.1	7.362	8	0.3619	0	0.2391	CUN047 hypothetical protein
BGPR01068391.1_ORF.15	NC_003084.1_NP_203356.1	8.267	8	0.2955	0	0.3243	CUN051 hypothetical protein
BGPR01068391.1_ORF.15	NC_003084.1_NP_203388.1	8.267	8	0.3204	0	0.2684	CUN083 hypothetical protein
BGPR01068391.1_ORF.15	NC_001973.1_NP_047672.1	4.629	8	0.1956	0	0.2352	LdOrf-36 peptide
BGPR01068391.1_ORF.15	NC_002816.1_NP_148894.1	5.838	8	0.2034	0	0.3184	ORF110
BGPR01068391.1_ORF.15	NC_002816.1_NP_148825.1	7.362	8	0.2346	0	0.3176	ORF41 LEF-2
BGPR01068391.1_ORF.15	NC_001973.1_NP_047648.1	6.947	8	0.1852	0	0.4001	LdOrf-12 peptide
BGPR01068391.1_ORF.15	NC_002816.1_NP_148887.1	9.834	8	0.4754	0	0.2356	ORF103 similar to AcMNPV ORF81
BGPR01068391.1_ORF.15	NC_001623.1_NP_054159.1	7.801	8	0.2538	0	0.3262	viral capsid protein
BGPR01068391.1_ORF.15	NC_001973.1_NP_047712.1	9.281	8	0.3622	0	0.2814	Ld-bro-g
BGPR01068391.1_ORF.15	NC_001973.1_NP_047673.1	7.801	8	0.3018	0	0.2722	LdOrf-37 peptide
BGPR01068391.1_ORF.15	NC_001623.1_NP_054078.1	2.307	8	0.107	0	0.2419	proliferating cell nuclear antigen
BGPR01068391.1_ORF.15	NC_001623.1_NP_054104.1	5.838	8	0.1782	0	0.3251	AcOrf-74 peptide
BGPR01068391.1_ORF.15	NC_001623.1_NP_054129.1	5.509	8	0.147	0	0.364	late expression factor 5
BGPR01068391.1_ORF.15	NC_001973.1_NP_047793.1	2.91	8	0.1435	0	0.2373	fibroblast growth factor
BGPR01068391.1_ORF.15	NC_001973.1_NP_047693.1	2.91	8	0.145	0	0.2408	LdOrf-57 peptide
BGPR01068391.1_ORF.15	NC_001973.1_NP_047757.1	5.509	8	0.1875	0	0.3401	ribonucleotide reductase small subunit homolog
BGPR01068391.1_ORF.15	NC_001623.1_NP_054047.1	1.939	8	0.1408	0	0.1696	AcOrf-18 peptide
BGPR01068391.1_ORF.15	NC_001973.1_NP_047784.1	3.463	8	0.1141	0	0.3815	ribonucleotide reductase small subunit homolog
BGPR01068391.1_ORF.15	NC_001623.1_NP_054131.1	4.368	8	0.1236	0	0.351	hypothetical protein
BGPR01068391.1_ORF.15	NC_001973.1_NP_047795.1	1.939	8	0.1496	0	0.1898	LdOrf-158 peptide
BGPR01068391.1_ORF.15	NC_001973.1_NP_047718.1	2.746	8	0.09323	0	0.3226	late expression factor 3
BGPR01068391.1_ORF.15	NC_001973.1_NP_047739.1	7.801	8	0.2102	0	0.4099	LdOrf-102 peptide
BGPR01068391.1_ORF.15	NC_001623.1_NP_054092.1	6.556	8	0.1977	0	0.342	late expression factor 9
BGPR01068391.1_ORF.15	NC_001973.1_NP_047638.1	6.947	8	0.2037	0	0.3488	essential structural protein pp78-81
BGPR01068391.1_ORF.15	NC_002816.1_NP_148895.1	6.947	8	0.3222	0	0.2542	ORF111 DNAPOL
BGPR01068391.1_ORF.15	NC_003084.1_NP_203344.1	6.556	7	0.2363	0	0.2552	CUN040 hypothetical protein
BGPR01068391.1_ORF.15	NC_002816.1_NP_148898.1	6.947	7	0.3079	0	0.1762	ORF114 similar to AcMNPV ORF68
BGPR01068391.1_ORF.15	NC_005906.1_YP_025282.1	7.801	7	0.236	0	0.307	hypothetical protein
BGPR01068391.1_ORF.15	NC_001973.1_NP_047774.1	8.267	7	0.2257	0	0.2952	late expression factor 2
BGPR01068391.1_ORF.15	NC_001973.1_NP_047733.1	2.91	7	0.1331	0	0.2073	Ld-odv-e25 peptide
BGPR01068391.1_ORF.15	NC_001623.1_NP_054124.1	7.362	7	0.2407	0	0.2481	occlusion-derived virus envelope protein
BGPR01068391.1_ORF.15	NC_001623.1_NP_054043.1	5.509	7	0.132	0	0.3532	late expression factor 1
BGPR01068391.1_ORF.15	NC_002816.1_NP_148836.1	9.281	7	0.2258	0	0.3816	ORF52 similar to AcMNPV ORF106 and ORF107
BGPR01068391.1_ORF.15	NC_001623.1_NP_054068.1	4.122	7	0.1067	0	0.3065	hypothetical protein
BGPR01068391.1_ORF.15	NC_002816.1_NP_148890.1	3.89	7	0.1167	0	0.3043	ORF106 VLF-1
BGPR01068391.1_ORF.15	NC_003084.1_NP_203360.1	7.801	7	0.1674	0	0.3574	CUN055 hypothetical protein
BGPR01068391.1_ORF.15	NC_003084.1_NP_203373.1	7.362	7	0.1859	0	0.321	CUN069 similar to AcMNPV ORF109
BGPR01068391.1_ORF.15	NC_001623.1_NP_054171.1	6.187	7	0.1373	0	0.3697	putative early gene transactivator
BGPR01068391.1_ORF.15	NC_001973.1_NP_047687.1	6.556	7	0.2217	0	0.2486	late expression factor 8
BGPR01068391.1_ORF.15	NC_002816.1_NP_148920.1	5.199	6	0.1777	0	0.1752	ORF136 similar to XcGV ORF173
BGPR01068391.1_ORF.15	NC_001973.1_NP_047692.1	8.267	6	0.177	0	0.3308	late expression factor 10
BGPR01068391.1_ORF.15	NC_005906.1_YP_025272.1	7.362	6	0.2089	0	0.2321	hypothetical protein
BGPR01068391.1_ORF.15	NC_001973.1_NP_047685.1	9.834	6	0.2143	0	0.3579	LdOrf-49 peptide
BGPR01068391.1_ORF.15	NC_001623.1_NP_054066.1	7.801	6	0.1831	0	0.3087	late expression factor 11
BGPR01068391.1_ORF.15	NC_005906.1_YP_025271.1	6.556	6	0.1686	0	0.2788	hypothetical protein
BGPR01068391.1_ORF.15	NC_001973.1_NP_047753.1	4.906	6	0.1312	0	0.2517	dUTPase
BGPR01068391.1_ORF.15	NC_001623.1_NP_054093.1	6.556	6	0.1324	0	0.2849	AcOrf-63 peptide
BGPR01068391.1_ORF.15	NC_001973.1_NP_047645.1	3.463	6	0.1558	0	0.1651	LdOrf-9 peptide
BGPR01068391.1_ORF.15	NC_001623.1_NP_054126.1	6.187	6	0.1669	0	0.2176	AcOrf-96 peptide
BGPR01068391.1_ORF.15	NC_001973.1_NP_047681.1	6.556	6	0.105	0	0.3659	late expression factor 11
BGPR01068391.1_ORF.15	NC_001973.1_NP_047697.1	7.362	6	0.117	0	0.3812	LdOrf-61 peptide
BGPR01068391.1_ORF.15	NC_005906.1_YP_025251.1	5.509	6	0.1583	0	0.2445	hypothetical protein
BGPR01068391.1_ORF.15	NC_003084.1_NP_203390.1	7.362	6	0.1296	0	0.3126	CUN086 hypothetical protein ATP_GTP_A motif
BGPR01068391.1_ORF.15	NC_003084.1_NP_203324.1	7.362	6	0.1478	0	0.3617	CUN020 hypothetical protein
BGPR01068391.1_ORF.15	NC_001973.1_NP_047798.1	6.947	6	0.1525	0	0.3225	Ld-bro-p
BGPR01068391.1_ORF.15	NC_005906.1_YP_025237.1	9.281	6	0.1933	0	0.306	late expression factor-9
BGPR01068391.1_ORF.15	NC_001623.1_NP_054149.1	6.187	6	0.1464	0	0.2301	AcOrf-119 peptide
BGPR01068391.1_ORF.15	NC_001973.1_NP_047707.1	8.267	6	0.2268	0	0.2404	chitinase
BGPR01068391.1_ORF.15	NC_002816.1_NP_148885.1	4.368	6	0.1055	0	0.3049	ORF101 VP91 capsid
BGPR01068391.1_ORF.15	NC_002816.1_NP_148827.1	9.281	5	0.2018	0	0.2079	ORF43
BGPR01068391.1_ORF.15	NC_002816.1_NP_148916.1	6.947	5	0.1169	0	0.289	ORF132 similar to XcGV ORF165
BGPR01068391.1_ORF.15	NC_003084.1_NP_203365.1	5.199	5	0.09185	0	0.2228	CUN061 hypothetical protein
BGPR01068391.1_ORF.15	NC_001623.1_NP_054123.1	9.834	5	0.1522	0	0.292	AcOrf-93 peptide
BGPR01068391.1_ORF.15	NC_002816.1_NP_148902.1	9.834	5	0.2101	0	0.2581	ORF118 FP
BGPR01068391.1_ORF.15	NC_001973.1_NP_047700.1	7.801	5	0.1121	0	0.344	Ld-FP'
BGPR01068391.1_ORF.15	NC_003084.1_NP_203359.1	6.947	5	0.08946	0	0.3895	CUN056 hypothetical protein
BGPR01068391.1_ORF.15	NC_003084.1_NP_203410.1	7.801	5	0.1205	0	0.316	CUN106 similar to AcMNPV ORF81
BGPR01068391.1_ORF.15	NC_002816.1_NP_148860.1	7.801	5	0.1802	0	0.2118	ORF76 similar to XcGV ORF85
BGPR01068391.1_ORF.15	NC_003084.1_NP_203343.1	6.947	5	0.1343	0	0.2275	CUN039 hypothetical protein
BGPR01068391.1_ORF.15	NC_005906.1_YP_025213.1	9.834	5	0.1556	0	0.3544	hypothetical protein
BGPR01068391.1_ORF.15	NC_001973.1_NP_047791.1	9.281	5	0.1416	0	0.3345	Ld-bro-o
BGPR01068391.1_ORF.15	NC_002816.1_NP_148867.1	8.759	5	0.1175	0	0.3275	ORF83 similar to AcMNPV ORF103
BGPR01068391.1_ORF.15	NC_002816.1_NP_148791.1	8.267	5	0.1314	0	0.3365	ORF7 IE-1
BGPR01068391.1_ORF.15	NC_001973.1_NP_047792.1	8.267	5	0.1518	0	0.2519	LdOrf-155 peptide
BGPR01068391.1_ORF.15	NC_002816.1_NP_148859.1	6.556	5	0.08998	0	0.2807	ORF75 similar to AcMNPV ORF119
BGPR01068391.1_ORF.15	NC_003084.1_NP_203378.1	8.267	5	0.143	0	0.2932	CUN074 putative p74 envelope protein, similar to AcMNPV ORF138
BGPR01068391.1_ORF.15	NC_001623.1_NP_054116.1	9.281	5	0.1893	0	0.2219	polynucleotide kinase/ligase
BGPR01068391.1_ORF.15	NC_003084.1_NP_203396.1	5.199	5	0.08339	0	0.3318	CUN091 putative dnapolymerase, similar to AcMNPV ORF65
BGPR01068391.1_ORF.15	NC_003084.1_NP_203314.1	9.281	4	0.1377	0	0.2022	CUN010 hypothetical protein
BGPR01068391.1_ORF.15	NC_001973.1_NP_047676.1	8.267	4	0.1289	0	0.2039	Ld-p26 peptide
BGPR01068391.1_ORF.15	NC_003084.1_NP_203376.1	9.834	4	0.1072	0	0.3056	CUN072 hypothetical protein
BGPR01068391.1_ORF.15	NC_005906.1_YP_025239.1	8.759	4	0.101	0	0.2669	hypothetical protein
BGPR01068391.1_ORF.15	NC_005906.1_YP_025260.1	8.759	4	0.1306	0	0.1883	hypothetical protein
BGPR01068391.1_ORF.15	NC_001973.1_NP_047686.1	9.281	4	0.1797	0	0.2006	Ld-helicase-2
BGPR01068391.1_ORF.15	NC_001973.1_NP_047730.1	6.187	4	0.09739	0	0.1829	late expression factor 4
BGPR01068391.1_ORF.15	NC_003084.1_NP_203305.1	8.759	4	0.098	0	0.2874	CUN001 putative bro protein, ATP_GTP_A motif, similar to AcMNPV ORF 2
BGPR01068391.1_ORF.15	NC_003084.1_NP_203377.1	8.759	3	0.07105	0	0.2913	CUN073 putative p47 transcription regulator factor, similar to AcMNPV ORF40
BGPR01068391.1_ORF.15	NC_001623.1_NP_054052.1	9.281	3	0.09183	0	0.226	copia-like envelope protein
BGPR01001437.1_ORF.134	NC_005906.1_YP_025245.1	2.814	19	0.5043	0.024	0.4875	hypothetical protein
BGPR01001437.1_ORF.134	NC_005906.1_YP_025212.1	6.01	15	0.6631	0.011	0.4344	late expression factor-11
BGPR01001437.1_ORF.134	NC_002816.1_NP_148814.1	3.708	15	0.4133	0.011	0.4755	ORF30 similar to XcGV ORF26
BGPR01001437.1_ORF.134	NC_001623.1_NP_054106.1	6.439	11	0.3698	0.007	0.4606	AcOrf-76 peptide
BGPR01001437.1_ORF.134	NC_001623.1_NP_054114.1	7.39	11	0.5315	0.007	0.3815	AcOrf-84 peptide
BGPR01001437.1_ORF.134	NC_001623.1_NP_054104.1	5.609	10	0.2479	0	0.4801	AcOrf-74 peptide
BGPR01001437.1_ORF.134	NC_005906.1_YP_025235.1	6.439	9	0.2785	0	0.4238	hypothetical protein
BGPR01001437.1_ORF.134	NC_002816.1_NP_148844.1	6.439	9	0.279	0	0.4101	ORF60 P74
BGPR01001437.1_ORF.134	NC_001623.1_NP_054135.1	9.086	7	0.2794	0	0.4678	hypothetical protein
BGPR01001437.1_ORF.134	NC_001973.1_NP_047742.1	9.734	7	0.2758	0	0.4262	Ld-vp80
BGPR01001437.1_ORF.134	NC_003084.1_NP_203334.1	8.482	6	0.232	0	0.3618	CUN030 similar to AcMNPV ORF142
BGPR01001437.1_ORF.187	NC_002816.1_NP_148828.1	1.558	18	0.3523	0.02	0.4014	ORF44
BGPR01001437.1_ORF.187	NC_003084.1_NP_203372.1	3.794	15	0.4833	0.011	0.3819	CUN068 hypothetical protein
BGPR01001437.1_ORF.187	NC_001973.1_NP_047714.1	5.72	14	0.6871	0.01	0.3885	LdOrf-77 peptide
BGPR01001437.1_ORF.187	NC_001973.1_NP_047658.1	3.794	10	0.3478	0	0.2758	DNA ligase
BGPR01001437.1_ORF.187	NC_002816.1_NP_148876.1	9.231	7	0.3553	0	0.354	ORF92 similar to AcMNPV ORF93
BGPR01001437.1_ORF.187	NC_003084.1_NP_203341.1	8.622	6	0.2248	0	0.3291	CUN037 hypothetical protein
BGPR01001437.1_ORF.187	NC_002816.1_NP_148830.1	9.883	5	0.2051	0	0.292	ORF46 metalloproteinase
BGPR01001437.1_ORF.187	NC_001973.1_NP_047640.1	9.883	5	0.1919	0	0.3295	mucin-like protein
BGPR01001437.1_ORF.187	NC_002816.1_NP_148916.1	9.883	4	0.1791	0	0.3076	ORF132 similar to XcGV ORF165
BGPR01003736.1_ORF.166	NC_005906.1_YP_025257.1	3.245e-05	158	0.562	1	0.6496	hypothetical protein	PIF-4
BGPR01003736.1_ORF.166	NC_002816.1_NP_148873.1	0.0001533	135	0.5483	1	0.6161	ORF89 similar to AcMNPV ORF96	PIF-4
BGPR01003736.1_ORF.166	NC_003084.1_NP_203393.1	0.000998	110	0.528	1	0.589	CUN090 putative similar to AcMNPV ORF96	PIF-4
BGPR01003736.1_ORF.166	NC_001623.1_NP_054126.1	0.0006164	108	0.503	1	0.5455	AcOrf-96 peptide	PIF-4
BGPR01003736.1_ORF.166	NC_001973.1_NP_047735.1	0.001376	106	0.5405	1	0.5642	LdOrf-98 peptide	PIF-4
BGPR01003736.1_ORF.166	NC_002816.1_NP_148907.1	0.1796	26	0.2043	0.063	0.3294	ORF123 FGF
BGPR01003736.1_ORF.166	NC_003084.1_NP_203306.1	0.2756	25	0.2195	0.057	0.3379	CUN002 hypothetical protein, ATP_GTP_A motif
BGPR01003736.1_ORF.166	NC_003084.1_NP_203314.1	1.373	20	0.3271	0.029	0.3201	CUN010 hypothetical protein
BGPR01003736.1_ORF.166	NC_001623.1_NP_054151.1	0.38	19	0.1944	0.024	0.2559	AcOrf-121 peptide
BGPR01003736.1_ORF.166	NC_001623.1_NP_054045.1	3.797	18	0.3716	0.02	0.4373	AcOrf-16 peptide
BGPR01003736.1_ORF.166	NC_001973.1_NP_047686.1	4.006	18	0.4331	0.02	0.3978	Ld-helicase-2
BGPR01003736.1_ORF.166	NC_002816.1_NP_148920.1	6.484	17	0.6007	0.016	0.423	ORF136 similar to XcGV ORF173
BGPR01003736.1_ORF.166	NC_003084.1_NP_203351.1	1.893	17	0.2661	0.016	0.3247	CUN047 hypothetical protein
BGPR01003736.1_ORF.166	NC_002816.1_NP_148853.1	0.2347	17	0.1483	0.016	0.2182	ORF69 similar to AcMNPV ORF38
BGPR01003736.1_ORF.166	NC_001973.1_NP_047766.1	3.412	17	0.4955	0.016	0.2838	LdOrf-129 peptide
BGPR01003736.1_ORF.166	NC_001973.1_NP_047653.1	4.704	16	0.3675	0.014	0.4315	LdOrf-17 peptide
BGPR01003736.1_ORF.166	NC_002816.1_NP_148910.1	4.704	16	0.4081	0.014	0.3768	ORF126 HELICASE-2
BGPR01003736.1_ORF.166	NC_002816.1_NP_148793.1	2.611	14	0.1974	0.01	0.4131	ORF9 similar to AcMNPV ORF145
BGPR01003736.1_ORF.166	NC_003084.1_NP_203382.1	3.234	14	0.2685	0.01	0.3368	CUN078 hypothetical protein
BGPR01003736.1_ORF.166	NC_005906.1_YP_025271.1	1.051	14	0.1424	0.01	0.3155	hypothetical protein
BGPR01003736.1_ORF.166	NC_003084.1_NP_203365.1	2.223	14	0.1775	0.01	0.3797	CUN061 hypothetical protein
BGPR01003736.1_ORF.166	NC_001973.1_NP_047789.1	6.147	14	0.5433	0.01	0.3159	LdOrf-152 peptide
BGPR01003736.1_ORF.166	NC_001973.1_NP_047668.1	6.147	14	0.3456	0.01	0.4951	Ld-bro-a
BGPR01003736.1_ORF.166	NC_002816.1_NP_148813.1	2.754	13	0.2904	0.009	0.24	ORF29 similar to XcGV ORF25
BGPR01003736.1_ORF.166	NC_005906.1_YP_025283.1	3.234	13	0.2083	0.009	0.3639	viral capsid associated protein
BGPR01003736.1_ORF.166	NC_001623.1_NP_054113.1	2.223	13	0.1939	0.009	0.3334	viral capsid associated protein
BGPR01003736.1_ORF.166	NC_001623.1_NP_054181.1	5.235	12	0.2358	0.008	0.4099	AcOrf-150 peptide
BGPR01003736.1_ORF.166	NC_002816.1_NP_148848.1	2.346	12	0.2319	0.008	0.233	ORF64 similar to XcGV ORF66
BGPR01003736.1_ORF.166	NC_001623.1_NP_054116.1	3.234	12	0.2058	0.008	0.3115	polynucleotide kinase/ligase
BGPR01003736.1_ORF.166	NC_001623.1_NP_054075.1	7.612	12	0.4845	0.008	0.3291	occlusion-derived virus envelope protein
BGPR01003736.1_ORF.166	NC_003084.1_NP_203387.1	7.216	11	0.3372	0.007	0.3628	CUN084 hypothetical protein
BGPR01003736.1_ORF.166	NC_001973.1_NP_047661.1	1.893	11	0.1471	0.007	0.2582	LdOrf-25 peptide
BGPR01003736.1_ORF.166	NC_001973.1_NP_047788.1	3.412	11	0.2586	0.007	0.2208	LdOrf-151 peptide
BGPR01003736.1_ORF.166	NC_002816.1_NP_148788.1	2.754	11	0.1702	0.007	0.2856	ORF4 similar to XcGV ORF7
BGPR01003736.1_ORF.166	NC_001973.1_NP_047733.1	6.484	11	0.2935	0.007	0.3702	Ld-odv-e25 peptide
BGPR01003736.1_ORF.166	NC_001623.1_NP_054039.1	2.754	11	0.1905	0.007	0.268	protein kinase
BGPR01003736.1_ORF.166	NC_005906.1_YP_025284.1	3.599	11	0.2598	0.007	0.2218	viral capsid associated protein
BGPR01003736.1_ORF.166	NC_001623.1_NP_054042.1	5.235	11	0.2585	0.007	0.3381	AcOrf-13 peptide
BGPR01003736.1_ORF.166	NC_001973.1_NP_047790.1	6.841	11	0.3388	0.007	0.3457	Ld-bro-n
BGPR01003736.1_ORF.166	NC_003084.1_NP_203363.1	9.426	11	0.4199	0.007	0.3971	CUN059 putative lef-9 transcription factor, RNApol motif, similar to AcMNPV ORF62
BGPR01003736.1_ORF.166	NC_001973.1_NP_047728.1	4.226	11	0.2233	0.007	0.3328	capsid associated protein
BGPR01003736.1_ORF.166	NC_001623.1_NP_054083.1	8.471	10	0.3979	0	0.3005	late expression factor 10
BGPR01003736.1_ORF.166	NC_003084.1_NP_203344.1	4.226	10	0.1958	0	0.2768	CUN040 hypothetical protein
BGPR01003736.1_ORF.166	NC_002816.1_NP_148914.1	4.459	10	0.2197	0	0.2678	ORF130 similar to PxGV ORF108
BGPR01003736.1_ORF.166	NC_001623.1_NP_054061.1	2.754	10	0.1767	0	0.2591	fibroblast growth factor
BGPR01003736.1_ORF.166	NC_001973.1_NP_047641.1	6.841	10	0.2928	0	0.3192	LdOrf-5 peptide
BGPR01003736.1_ORF.166	NC_001973.1_NP_047764.1	3.234	10	0.1371	0	0.3421	LdOrf-127 peptide
BGPR01003736.1_ORF.166	NC_001973.1_NP_047727.1	1.893	10	0.119	0	0.2878	LdOrf-82 peptide
BGPR01003736.1_ORF.166	NC_003084.1_NP_203376.1	3.797	10	0.1959	0	0.2557	CUN072 hypothetical protein
BGPR01003736.1_ORF.166	NC_001623.1_NP_054078.1	2.754	10	0.1663	0	0.2691	proliferating cell nuclear antigen
BGPR01003736.1_ORF.166	NC_003084.1_NP_203391.1	9.426	10	0.4686	0	0.3025	CUN088 putative lef-5 late expression factor, similar to AcMNPV ORF99
BGPR01003736.1_ORF.166	NC_001623.1_NP_054031.1	9.942	10	0.3923	0	0.3765	baculovirus repeated ORF
BGPR01003736.1_ORF.166	NC_001973.1_NP_047791.1	9.426	10	0.3687	0	0.3783	Ld-bro-o
BGPR01003736.1_ORF.166	NC_005906.1_YP_025239.1	4.459	10	0.2288	0	0.2841	hypothetical protein
BGPR01003736.1_ORF.166	NC_005906.1_YP_025259.1	3.234	10	0.1912	0	0.2432	late expression factor-4
BGPR01003736.1_ORF.166	NC_002816.1_NP_148830.1	3.599	10	0.2103	0	0.2448	ORF46 metalloproteinase
BGPR01003736.1_ORF.166	NC_001973.1_NP_047666.1	9.426	9	0.2719	0	0.455	LdOrf-30 peptide
BGPR01003736.1_ORF.166	NC_005906.1_YP_025272.1	7.216	9	0.2489	0	0.3115	hypothetical protein
BGPR01003736.1_ORF.166	NC_003084.1_NP_203380.1	5.235	9	0.2242	0	0.2647	CUN076 hypothetical protein
BGPR01003736.1_ORF.166	NC_002816.1_NP_148856.1	6.484	9	0.2901	0	0.2299	ORF72
BGPR01003736.1_ORF.166	NC_001973.1_NP_047717.1	4.459	9	0.2181	0	0.2396	LdOrf-80 peptide
BGPR01003736.1_ORF.166	NC_002816.1_NP_148814.1	1.701	9	0.1315	0	0.2106	ORF30 similar to XcGV ORF26
BGPR01003736.1_ORF.166	NC_003084.1_NP_203346.1	4.962	9	0.1801	0	0.2878	CUN041 hypothetical protein
BGPR01003736.1_ORF.166	NC_001623.1_NP_054067.1	1.109	9	0.09388	0	0.225	AcOrf-38 peptide
BGPR01003736.1_ORF.166	NC_002816.1_NP_148924.1	3.797	9	0.1669	0	0.2665	ORF140 similar to XcGV ORF178
BGPR01003736.1_ORF.166	NC_002816.1_NP_148901.1	3.412	9	0.1486	0	0.2489	ORF117 LEF-9
BGPR01003736.1_ORF.166	NC_001973.1_NP_047792.1	9.426	9	0.3262	0	0.3805	LdOrf-155 peptide
[truncated: 45,590 more rows]

## Sheet: Table S3
Supplementary Table 3. Information of the Arachnida WGS data used in this study
[truncated: 144 more rows]

[truncated: 9 more sheets: Table S4, Table S5, Table S6, Table S7, Table S8, Table S9, Table S10, Table S11, Table S12]
